# Supplementary material for: Nonlinear expression patterns and multiple shifts in gene network interactions underlie robust phenotypic change in Drosophila melanogaster selected for night sleep duration
Source: PLoS Comput Biol. 2023 Aug 10;19(8):e1011389. doi: 10.1371/journal.pcbi.1011389 (PMC10443883; doi:10.1371/journal.pcbi.1011389)
Supplement: S3 Table — For each sleep trait, the ANOVA analysis results are presented for each generation. Source indicates each factor in the model. rep, replicate; sel, selection scheme; d.f., degrees of freedom; M.S., Type III mean squares; F, F ratio statistic; P, P-value. (XLSX) [file pcbi.1011389.s011.xlsx]

## Sheet: S3 Table
Trait	Sex	Generation	Source	d.f.	M.S.	F	P
Night sleep (min.)	Combined Sexes	0	sel	1	74.3803	0	0.991
Night sleep (min.)	Combined Sexes	0	rep(sel)	2	462058	4.39	0.1855
Night sleep (min.)	Combined Sexes	0	sex	1	325530	3.09	0.2207
Night sleep (min.)	Combined Sexes	0	sel*sex	1	6161.05	0.06	0.8313
Night sleep (min.)	Combined Sexes	0	rep*sex(sel)	2	105225	6.57	0.0015
Night sleep (min.)	Female	0	sel	1	2403.91	0.01	0.9493
Night sleep (min.)	Female	0	rep(sel)	2	466324	22.76	<.0001
Night sleep (min.)	Male	0	sel	1	3853.74	0.04	0.8611
Night sleep (min.)	Male	0	rep(sel)	2	97905	8.39	0.0003
Night sleep (min.)	Combined Sexes	1	sel	1	1.59569e+06	12.97	0.0692
Night sleep (min.)	Combined Sexes	1	rep(sel)	2	123087	16.35	0.0576
Night sleep (min.)	Combined Sexes	1	sex	1	66165.9	8.79	0.0974
Night sleep (min.)	Combined Sexes	1	sel*sex	1	9972.8	1.32	0.3688
Night sleep (min.)	Combined Sexes	1	rep*sex(sel)	2	7529.95	0.54	0.5835
Night sleep (min.)	Female	1	sel	1	915849	9.84	0.0883
Night sleep (min.)	Female	1	rep(sel)	2	93049.8	5.49	0.0045
Night sleep (min.)	Male	1	sel	1	686525	18.65	0.0496
Night sleep (min.)	Male	1	rep(sel)	2	36805.4	3.32	0.0372
Night sleep (min.)	Combined Sexes	2	sel	1	5.25318e+06	58.73	0.0166
Night sleep (min.)	Combined Sexes	2	rep(sel)	2	89499.1	1.42	0.413
Night sleep (min.)	Combined Sexes	2	sex	1	229375	3.64	0.1964
Night sleep (min.)	Combined Sexes	2	sel*sex	1	5727.1	0.09	0.7914
Night sleep (min.)	Combined Sexes	2	rep*sex(sel)	2	62962	4.59	0.0104
Night sleep (min.)	Female	2	sel	1	2.44022e+06	47.22	0.0205
Night sleep (min.)	Female	2	rep(sel)	2	51692.1	3.08	0.0472
Night sleep (min.)	Male	2	sel	1	2.82115e+06	27.97	0.0339
Night sleep (min.)	Male	2	rep(sel)	2	100936	9.47	<.0001
Night sleep (min.)	Combined Sexes	3	sel	1	1.15606e+07	954.57	0.001
Night sleep (min.)	Combined Sexes	3	rep(sel)	2	12110.8	1.38	0.4204
Night sleep (min.)	Combined Sexes	3	sex	1	1343.05	0.15	0.7335
Night sleep (min.)	Combined Sexes	3	sel*sex	1	690.664	0.08	0.8055
Night sleep (min.)	Combined Sexes	3	rep*sex(sel)	2	8783.51	0.67	0.5102
Night sleep (min.)	Female	3	sel	1	5.69889e+06	356.56	0.0028
Night sleep (min.)	Female	3	rep(sel)	2	15983	1.15	0.3184
Night sleep (min.)	Male	3	sel	1	5.86221e+06	1200.94	0.0008
Night sleep (min.)	Male	3	rep(sel)	2	4881.37	0.4	0.6695
Night sleep (min.)	Combined Sexes	4	sel	1	1.67885e+07	350.91	0.0028
Night sleep (min.)	Combined Sexes	4	rep(sel)	2	47845.4	0.28	0.7789
Night sleep (min.)	Combined Sexes	4	sex	1	2102.72	0.01	0.9213
Night sleep (min.)	Combined Sexes	4	sel*sex	1	507.912	0	0.9612
Night sleep (min.)	Combined Sexes	4	rep*sex(sel)	2	168578	13.58	<.0001
Night sleep (min.)	Female	4	sel	1	8.39927e+06	44.58	0.0217
Night sleep (min.)	Female	4	rep(sel)	2	188467	16.23	<.0001
Night sleep (min.)	Male	4	sel	1	8.3896e+06	340.46	0.0029
Night sleep (min.)	Male	4	rep(sel)	2	24642.2	1.87	0.1562
Night sleep (min.)	Combined Sexes	5	sel	1	2.31008e+07	85.27	0.0115
Night sleep (min.)	Combined Sexes	5	rep(sel)	2	270946	1.37	0.4212
Night sleep (min.)	Combined Sexes	5	sex	1	233117	1.18	0.3905
Night sleep (min.)	Combined Sexes	5	sel*sex	1	194036	0.98	0.4257
Night sleep (min.)	Combined Sexes	5	rep*sex(sel)	2	197191	16.25	<.0001
Night sleep (min.)	Female	5	sel	1	1.40644e+07	4700.58	0.0002
Night sleep (min.)	Female	5	rep(sel)	2	2992	0.21	0.8086
Night sleep (min.)	Male	5	sel	1	9.33128e+06	20.33	0.0458
Night sleep (min.)	Male	5	rep(sel)	2	459107	45.38	<.0001
Night sleep (min.)	Combined Sexes	6	sel	1	2.51345e+07	132.93	0.0074
Night sleep (min.)	Combined Sexes	6	rep(sel)	2	189079	6.64	0.1308
Night sleep (min.)	Combined Sexes	6	sex	1	49680.2	1.75	0.3173
Night sleep (min.)	Combined Sexes	6	sel*sex	1	45023.4	1.58	0.3354
Night sleep (min.)	Combined Sexes	6	rep*sex(sel)	2	28458.4	1.94	0.1451
Night sleep (min.)	Female	6	sel	1	1.37958e+07	97.65	0.0101
Night sleep (min.)	Female	6	rep(sel)	2	141277	9.51	<.0001
Night sleep (min.)	Male	6	sel	1	1.14083e+07	149.95	0.0066
Night sleep (min.)	Male	6	rep(sel)	2	76089.8	5.23	0.0058
Night sleep (min.)	Combined Sexes	7	sel	1	2.91115e+07	263.02	0.0038
Night sleep (min.)	Combined Sexes	7	rep(sel)	2	110695	27.87	0.0346
Night sleep (min.)	Combined Sexes	7	sex	1	9209.31	2.32	0.2672
Night sleep (min.)	Combined Sexes	7	sel*sex	1	7137.72	1.8	0.312
Night sleep (min.)	Combined Sexes	7	rep*sex(sel)	2	3971.76	0.43	0.6531
Night sleep (min.)	Female	7	sel	1	1.38129e+07	281.92	0.0035
Night sleep (min.)	Female	7	rep(sel)	2	49006.2	5.09	0.0066
Night sleep (min.)	Male	7	sel	1	1.53378e+07	232.33	0.0043
Night sleep (min.)	Male	7	rep(sel)	2	66020.2	7.32	0.0008
Night sleep (min.)	Combined Sexes	8	sel	1	3.81386e+07	492.6	0.002
Night sleep (min.)	Combined Sexes	8	rep(sel)	2	77443.1	5.57	0.1521
Night sleep (min.)	Combined Sexes	8	sex	1	38439.3	2.77	0.2381
Night sleep (min.)	Combined Sexes	8	sel*sex	1	1527.81	0.11	0.7717
Night sleep (min.)	Combined Sexes	8	rep*sex(sel)	2	13897.3	1.84	0.1596
Night sleep (min.)	Female	8	sel	1	1.8948e+07	1326.95	0.0008
Night sleep (min.)	Female	8	rep(sel)	2	14279.8	1.92	0.1474
Night sleep (min.)	Male	8	sel	1	1.91968e+07	247.11	0.004
Night sleep (min.)	Male	8	rep(sel)	2	77734.6	10.11	<.0001
Night sleep (min.)	Combined Sexes	9	sel	1	3.62173e+07	8182.89	0.0001
Night sleep (min.)	Combined Sexes	9	rep(sel)	2	4425.82	0.25	0.7971
Night sleep (min.)	Combined Sexes	9	sex	1	19689.2	1.13	0.3987
Night sleep (min.)	Combined Sexes	9	sel*sex	1	90.8159	0.01	0.949
Night sleep (min.)	Combined Sexes	9	rep*sex(sel)	2	17385.4	2.13	0.1199
Night sleep (min.)	Female	9	sel	1	1.82796e+07	968.57	0.001
Night sleep (min.)	Female	9	rep(sel)	2	18873.7	2.12	0.1209
Night sleep (min.)	Male	9	sel	1	1.794e+07	5858.97	0.0002
Night sleep (min.)	Male	9	rep(sel)	2	3061.93	0.41	0.6634
Night sleep (min.)	Combined Sexes	10	sel	1	3.7229e+07	184.58	0.0054
Night sleep (min.)	Combined Sexes	10	rep(sel)	2	201693	11.66	0.079
Night sleep (min.)	Combined Sexes	10	sex	1	30763.4	1.78	0.314
Night sleep (min.)	Combined Sexes	10	sel*sex	1	23727.1	1.37	0.3622
Night sleep (min.)	Combined Sexes	10	rep*sex(sel)	2	17300.8	2.01	0.1354
Night sleep (min.)	Female	10	sel	1	1.73426e+07	229.99	0.0043
Night sleep (min.)	Female	10	rep(sel)	2	75407.2	8.07	0.0004
Night sleep (min.)	Male	10	sel	1	1.99621e+07	137.82	0.0072
Night sleep (min.)	Male	10	rep(sel)	2	144847	18.24	<.0001
Night sleep (min.)	Combined Sexes	11	sel	1	4.14652e+07	1236.08	0.0008
Night sleep (min.)	Combined Sexes	11	rep(sel)	2	33545.8	0.67	0.5993
Night sleep (min.)	Combined Sexes	11	sex	1	1851.54	0.04	0.8654
Night sleep (min.)	Combined Sexes	11	sel*sex	1	41290	0.82	0.4601
Night sleep (min.)	Combined Sexes	11	rep*sex(sel)	2	50173.2	7.09	0.0009
Night sleep (min.)	Female	11	sel	1	1.93119e+07	246.29	0.004
Night sleep (min.)	Female	11	rep(sel)	2	78410.5	10.07	<.0001
Night sleep (min.)	Male	11	sel	1	2.22145e+07	4386.02	0.0002
Night sleep (min.)	Male	11	rep(sel)	2	5064.8	0.79	0.453
Night sleep (min.)	Combined Sexes	12	sel	1	4.71541e+07	359.15	0.0028
Night sleep (min.)	Combined Sexes	12	rep(sel)	2	131326	19.58	0.0486
Night sleep (min.)	Combined Sexes	12	sex	1	29987.4	4.47	0.1687
Night sleep (min.)	Combined Sexes	12	sel*sex	1	2609.61	0.39	0.5964
Night sleep (min.)	Combined Sexes	12	rep*sex(sel)	2	6705.57	1.09	0.3355
Night sleep (min.)	Female	12	sel	1	2.17046e+07	537.96	0.0019
Night sleep (min.)	Female	12	rep(sel)	2	40390.6	6.62	0.0015
Night sleep (min.)	Male	12	sel	1	2.57349e+07	249.91	0.004
Night sleep (min.)	Male	12	rep(sel)	2	102981	16.73	<.0001
Night sleep (min.)	Combined Sexes	13	sel	1	4.99657e+07	329.56	0.003
Night sleep (min.)	Combined Sexes	13	rep(sel)	2	151688	6.1	0.1409
Night sleep (min.)	Combined Sexes	13	sex	1	207.081	0.01	0.9356
Night sleep (min.)	Combined Sexes	13	sel*sex	1	36973	1.49	0.3469
Night sleep (min.)	Combined Sexes	13	rep*sex(sel)	2	24872.4	3.88	0.0212
Night sleep (min.)	Female	13	sel	1	2.30415e+07	401.26	0.0025
Night sleep (min.)	Female	13	rep(sel)	2	57437.6	6.96	0.0011
Night sleep (min.)	Male	13	sel	1	2.70661e+07	225.65	0.0044
Night sleep (min.)	Male	13	rep(sel)	2	120042	25.67	<.0001
Day avg. bout length (min.)	Combined Sexes	0	sel	1	4218.08	4.3	0.1738
Day avg. bout length (min.)	Combined Sexes	0	rep(sel)	2	980.626	5.39	0.1565
Day avg. bout length (min.)	Combined Sexes	0	sex	1	98201.4	539.7	0.0018
Day avg. bout length (min.)	Combined Sexes	0	sel*sex	1	5056.4	27.79	0.0342
Day avg. bout length (min.)	Combined Sexes	0	rep*sex(sel)	2	181.952	0.17	0.8414
Day avg. bout length (min.)	Female	0	sel	1	18.6671	0.05	0.8382
Day avg. bout length (min.)	Female	0	rep(sel)	2	347.146	8.37	0.0003
Day avg. bout length (min.)	Male	0	sel	1	9414.93	11.4	0.0777
Day avg. bout length (min.)	Male	0	rep(sel)	2	826.044	0.41	0.6666
Day avg. bout length (min.)	Combined Sexes	1	sel	1	621.312	0.11	0.7673
Day avg. bout length (min.)	Combined Sexes	1	rep(sel)	2	5426.53	2.93	0.2543
Day avg. bout length (min.)	Combined Sexes	1	sex	1	46405.5	25.08	0.0376
Day avg. bout length (min.)	Combined Sexes	1	sel*sex	1	4022.4	2.17	0.2783
Day avg. bout length (min.)	Combined Sexes	1	rep*sex(sel)	2	1850.59	1.18	0.3076
Day avg. bout length (min.)	Female	1	sel	1	730.507	0.94	0.4351
Day avg. bout length (min.)	Female	1	rep(sel)	2	779.332	0.35	0.7058
Day avg. bout length (min.)	Male	1	sel	1	3959.5	0.6	0.5189
Day avg. bout length (min.)	Male	1	rep(sel)	2	6576.11	7.15	0.0009
Day avg. bout length (min.)	Combined Sexes	2	sel	1	2575.04	0.29	0.6463
Day avg. bout length (min.)	Combined Sexes	2	rep(sel)	2	9007.03	7.85	0.113
Day avg. bout length (min.)	Combined Sexes	2	sex	1	38248.6	33.36	0.0286
Day avg. bout length (min.)	Combined Sexes	2	sel*sex	1	7243.64	6.32	0.1284
Day avg. bout length (min.)	Combined Sexes	2	rep*sex(sel)	2	1146.99	1.8	0.166
Day avg. bout length (min.)	Female	2	sel	1	586.673	0.28	0.6506
Day avg. bout length (min.)	Female	2	rep(sel)	2	2110.29	2.66	0.0711
Day avg. bout length (min.)	Male	2	sel	1	9288.28	1.15	0.3959
Day avg. bout length (min.)	Male	2	rep(sel)	2	8089.22	16.72	<.0001
Day avg. bout length (min.)	Combined Sexes	3	sel	1	1349.88	0.82	0.4601
Day avg. bout length (min.)	Combined Sexes	3	rep(sel)	2	1640.16	5.57	0.1521
Day avg. bout length (min.)	Combined Sexes	3	sex	1	22842.5	77.61	0.0126
Day avg. bout length (min.)	Combined Sexes	3	sel*sex	1	2264.66	7.69	0.1091
Day avg. bout length (min.)	Combined Sexes	3	rep*sex(sel)	2	294.315	0.82	0.4426
Day avg. bout length (min.)	Female	3	sel	1	58.915	0.04	0.8648
Day avg. bout length (min.)	Female	3	rep(sel)	2	1581.48	2.86	0.0587
Day avg. bout length (min.)	Male	3	sel	1	3550.98	10.11	0.0863
Day avg. bout length (min.)	Male	3	rep(sel)	2	351.075	2.1	0.1239
Day avg. bout length (min.)	Combined Sexes	4	sel	1	27011.4	7.72	0.1088
Day avg. bout length (min.)	Combined Sexes	4	rep(sel)	2	3497.35	5.06	0.1649
Day avg. bout length (min.)	Combined Sexes	4	sex	1	71395.4	103.39	0.0095
Day avg. bout length (min.)	Combined Sexes	4	sel*sex	1	12822.6	18.57	0.0499
Day avg. bout length (min.)	Combined Sexes	4	rep*sex(sel)	2	690.562	2.86	0.0582
Day avg. bout length (min.)	Female	4	sel	1	1292.88	1.94	0.2986
Day avg. bout length (min.)	Female	4	rep(sel)	2	667.627	5.02	0.007
Day avg. bout length (min.)	Male	4	sel	1	38933.5	11.04	0.0798
Day avg. bout length (min.)	Male	4	rep(sel)	2	3525.05	10.11	<.0001
Day avg. bout length (min.)	Combined Sexes	5	sel	1	7596.45	4.37	0.1717
Day avg. bout length (min.)	Combined Sexes	5	rep(sel)	2	1737.88	0.6	0.6234
Day avg. bout length (min.)	Combined Sexes	5	sex	1	32467.8	11.29	0.0783
Day avg. bout length (min.)	Combined Sexes	5	sel*sex	1	11728.3	4.08	0.1809
Day avg. bout length (min.)	Combined Sexes	5	rep*sex(sel)	2	2877.23	2.18	0.114
Day avg. bout length (min.)	Female	5	sel	1	228.312	0.06	0.8278
Day avg. bout length (min.)	Female	5	rep(sel)	2	3736.76	2.25	0.1063
Day avg. bout length (min.)	Male	5	sel	1	18702.6	20.52	0.0454
Day avg. bout length (min.)	Male	5	rep(sel)	2	911.549	0.94	0.3919
Day avg. bout length (min.)	Combined Sexes	6	sel	1	4086.52	0.91	0.4415
Day avg. bout length (min.)	Combined Sexes	6	rep(sel)	2	4506.75	2.16	0.3165
Day avg. bout length (min.)	Combined Sexes	6	sex	1	29940.3	14.35	0.0632
Day avg. bout length (min.)	Combined Sexes	6	sel*sex	1	8785.86	4.21	0.1766
Day avg. bout length (min.)	Combined Sexes	6	rep*sex(sel)	2	2086.59	1.53	0.2175
Day avg. bout length (min.)	Female	6	sel	1	448.858	0.25	0.6679
Day avg. bout length (min.)	Female	6	rep(sel)	2	1809.91	1.04	0.3552
Day avg. bout length (min.)	Male	6	sel	1	12301.3	2.59	0.249
Day avg. bout length (min.)	Male	6	rep(sel)	2	4754.4	4.86	0.0082
Day avg. bout length (min.)	Combined Sexes	7	sel	1	3444.76	1.82	0.3096
Day avg. bout length (min.)	Combined Sexes	7	rep(sel)	2	1891.4	3.77	0.2099
Day avg. bout length (min.)	Combined Sexes	7	sex	1	59572.3	118.56	0.0083
Day avg. bout length (min.)	Combined Sexes	7	sel*sex	1	6031.88	12	0.0741
Day avg. bout length (min.)	Combined Sexes	7	rep*sex(sel)	2	502.344	0.29	0.7483
Day avg. bout length (min.)	Female	7	sel	1	176.28	0.14	0.7419
Day avg. bout length (min.)	Female	7	rep(sel)	2	1235.51	0.66	0.5181
Day avg. bout length (min.)	Male	7	sel	1	9496.43	8.24	0.1029
Day avg. bout length (min.)	Male	7	rep(sel)	2	1152.05	0.72	0.4863
Day avg. bout length (min.)	Combined Sexes	8	sel	1	32593.7	48.47	0.02
Day avg. bout length (min.)	Combined Sexes	8	rep(sel)	2	672.574	0.34	0.7468
Day avg. bout length (min.)	Combined Sexes	8	sex	1	31336.5	15.8	0.0578
Day avg. bout length (min.)	Combined Sexes	8	sel*sex	1	6438.96	3.25	0.2133
Day avg. bout length (min.)	Combined Sexes	8	rep*sex(sel)	2	1983.62	15.69	<.0001
Day avg. bout length (min.)	Female	8	sel	1	4934.81	24.02	0.0392
Day avg. bout length (min.)	Female	8	rep(sel)	2	205.477	4.39	0.0131
Day avg. bout length (min.)	Male	8	sel	1	34668.1	13.82	0.0653
Day avg. bout length (min.)	Male	8	rep(sel)	2	2510.13	12.37	<.0001
Day avg. bout length (min.)	Combined Sexes	9	sel	1	39985	63.96	0.0153
Day avg. bout length (min.)	Combined Sexes	9	rep(sel)	2	625.198	1.59	0.3861
Day avg. bout length (min.)	Combined Sexes	9	sex	1	45625	116.03	0.0085
Day avg. bout length (min.)	Combined Sexes	9	sel*sex	1	5933.68	15.09	0.0603
Day avg. bout length (min.)	Combined Sexes	9	rep*sex(sel)	2	393.241	1.66	0.1909
Day avg. bout length (min.)	Female	9	sel	1	7603.38	42.08	0.0229
Day avg. bout length (min.)	Female	9	rep(sel)	2	180.724	4.6	0.0107
Day avg. bout length (min.)	Male	9	sel	1	38125.8	45.91	0.0211
Day avg. bout length (min.)	Male	9	rep(sel)	2	830.425	1.9	0.1511
Day avg. bout length (min.)	Combined Sexes	10	sel	1	38127.8	17.42	0.0529
Day avg. bout length (min.)	Combined Sexes	10	rep(sel)	2	2188.53	1.17	0.4601
Day avg. bout length (min.)	Combined Sexes	10	sex	1	43352.6	23.24	0.0404
Day avg. bout length (min.)	Combined Sexes	10	sel*sex	1	3290.97	1.76	0.3154
Day avg. bout length (min.)	Combined Sexes	10	rep*sex(sel)	2	1865.17	4.07	0.0174
Day avg. bout length (min.)	Female	10	sel	1	9322.83	1379.74	0.0007
Day avg. bout length (min.)	Female	10	rep(sel)	2	6.75676	0.05	0.9551
Day avg. bout length (min.)	Male	10	sel	1	32556.8	7.88	0.1069
Day avg. bout length (min.)	Male	10	rep(sel)	2	4131.88	5.46	0.0046
Day avg. bout length (min.)	Combined Sexes	11	sel	1	44637.7	50.68	0.0192
Day avg. bout length (min.)	Combined Sexes	11	rep(sel)	2	880.776	0.1	0.9124
Day avg. bout length (min.)	Combined Sexes	11	sex	1	45930.3	5.01	0.1546
Day avg. bout length (min.)	Combined Sexes	11	sel*sex	1	2354.99	0.26	0.6626
Day avg. bout length (min.)	Combined Sexes	11	rep*sex(sel)	2	9168.83	16.54	<.0001
Day avg. bout length (min.)	Female	11	sel	1	13153	2.53	0.2529
Day avg. bout length (min.)	Female	11	rep(sel)	2	5207.4	9.82	<.0001
Day avg. bout length (min.)	Male	11	sel	1	33983	7	0.118
Day avg. bout length (min.)	Male	11	rep(sel)	2	4852.81	8.39	0.0003
Day avg. bout length (min.)	Combined Sexes	12	sel	1	69261.1	311.3	0.0032
Day avg. bout length (min.)	Combined Sexes	12	rep(sel)	2	222.32	0.09	0.9176
Day avg. bout length (min.)	Combined Sexes	12	sex	1	41760.9	16.88	0.0544
Day avg. bout length (min.)	Combined Sexes	12	sel*sex	1	1694.89	0.69	0.4949
Day avg. bout length (min.)	Combined Sexes	12	rep*sex(sel)	2	2474.43	2.68	0.0689
Day avg. bout length (min.)	Female	12	sel	1	23027.5	21.96	0.0424
Day avg. bout length (min.)	Female	12	rep(sel)	2	1048.33	0.82	0.4411
Day avg. bout length (min.)	Male	12	sel	1	49807.6	29.27	0.0325
Day avg. bout length (min.)	Male	12	rep(sel)	2	1701.6	2.78	0.0635
Day avg. bout length (min.)	Combined Sexes	13	sel	1	75975.5	16.85	0.0545
Day avg. bout length (min.)	Combined Sexes	13	rep(sel)	2	4511.37	3.91	0.2038
Day avg. bout length (min.)	Combined Sexes	13	sex	1	87392.4	75.71	0.0129
Day avg. bout length (min.)	Combined Sexes	13	sel*sex	1	13454	11.66	0.0761
Day avg. bout length (min.)	Combined Sexes	13	rep*sex(sel)	2	1154.57	2.04	0.1304
Day avg. bout length (min.)	Female	13	sel	1	12419.6	11.12	0.0794
Day avg. bout length (min.)	Female	13	rep(sel)	2	1117.42	23.95	<.0001
Day avg. bout length (min.)	Male	13	sel	1	78738.8	17	0.0541
Day avg. bout length (min.)	Male	13	rep(sel)	2	4635	4.39	0.013
Night avg. bout length (min.)	Combined Sexes	0	sel	1	848.926	0.01	0.9174
Night avg. bout length (min.)	Combined Sexes	0	rep(sel)	2	61719.2	1.91	0.3441
Night avg. bout length (min.)	Combined Sexes	0	sex	1	62218.4	1.92	0.3
Night avg. bout length (min.)	Combined Sexes	0	sel*sex	1	10389.8	0.32	0.6281
Night avg. bout length (min.)	Combined Sexes	0	rep*sex(sel)	2	32374.7	4.63	0.01
Night avg. bout length (min.)	Female	0	sel	1	2609.48	0.04	0.8642
Night avg. bout length (min.)	Female	0	rep(sel)	2	69408.9	10.7	<.0001
Night avg. bout length (min.)	Male	0	sel	1	8722.97	0.36	0.6107
Night avg. bout length (min.)	Male	0	rep(sel)	2	24409.9	3.27	0.0392
Night avg. bout length (min.)	Combined Sexes	1	sel	1	92589	7.93	0.1064
Night avg. bout length (min.)	Combined Sexes	1	rep(sel)	2	11677.6	7.17	0.1224
Night avg. bout length (min.)	Combined Sexes	1	sex	1	3132.45	1.92	0.2999
Night avg. bout length (min.)	Combined Sexes	1	sel*sex	1	194.355	0.12	0.7628
Night avg. bout length (min.)	Combined Sexes	1	rep*sex(sel)	2	1629.28	0.28	0.7553
Night avg. bout length (min.)	Female	1	sel	1	41553.9	7.4	0.1127
Night avg. bout length (min.)	Female	1	rep(sel)	2	5613.57	0.77	0.4623
Night avg. bout length (min.)	Male	1	sel	1	51370.2	6.65	0.1232
Night avg. bout length (min.)	Male	1	rep(sel)	2	7726.17	1.76	0.1731
Night avg. bout length (min.)	Combined Sexes	2	sel	1	328020	42.76	0.0226
Night avg. bout length (min.)	Combined Sexes	2	rep(sel)	2	7673.82	0.41	0.7095
Night avg. bout length (min.)	Combined Sexes	2	sex	1	148918	7.95	0.1061
Night avg. bout length (min.)	Combined Sexes	2	sel*sex	1	50516.3	2.7	0.2422
Night avg. bout length (min.)	Combined Sexes	2	rep*sex(sel)	2	18738.1	4.91	0.0076
Night avg. bout length (min.)	Female	2	sel	1	60153.2	49.68	0.0194
Night avg. bout length (min.)	Female	2	rep(sel)	2	1209.59	0.38	0.6837
Night avg. bout length (min.)	Male	2	sel	1	320064	12.62	0.0709
Night avg. bout length (min.)	Male	2	rep(sel)	2	25379.3	5.71	0.0036
Night avg. bout length (min.)	Combined Sexes	3	sel	1	519587	142.41	0.0069
Night avg. bout length (min.)	Combined Sexes	3	rep(sel)	2	3648.53	0.2	0.8323
Night avg. bout length (min.)	Combined Sexes	3	sex	1	10757.2	0.59	0.5215
Night avg. bout length (min.)	Combined Sexes	3	sel*sex	1	2300.92	0.13	0.7556
Night avg. bout length (min.)	Combined Sexes	3	rep*sex(sel)	2	18112.3	5.17	0.0059
Night avg. bout length (min.)	Female	3	sel	1	226669	12.77	0.0701
Night avg. bout length (min.)	Female	3	rep(sel)	2	17744	4.43	0.0125
Night avg. bout length (min.)	Male	3	sel	1	295127	72.08	0.0136
Night avg. bout length (min.)	Male	3	rep(sel)	2	4094.6	1.37	0.2559
Night avg. bout length (min.)	Combined Sexes	4	sel	1	1.25009e+06	37.2	0.0258
Night avg. bout length (min.)	Combined Sexes	4	rep(sel)	2	33604.9	2.76	0.266
Night avg. bout length (min.)	Combined Sexes	4	sex	1	73178.6	6.01	0.1338
Night avg. bout length (min.)	Combined Sexes	4	sel*sex	1	14770.2	1.21	0.3856
Night avg. bout length (min.)	Combined Sexes	4	rep*sex(sel)	2	12176.5	2.21	0.1109
Night avg. bout length (min.)	Female	4	sel	1	491424	11.56	0.0767
Night avg. bout length (min.)	Female	4	rep(sel)	2	42511.7	8.49	0.0002
Night avg. bout length (min.)	Male	4	sel	1	776405	236.56	0.0042
Night avg. bout length (min.)	Male	4	rep(sel)	2	3282.01	0.54	0.5804
Night avg. bout length (min.)	Combined Sexes	5	sel	1	1.60097e+06	40.81	0.0236
Night avg. bout length (min.)	Combined Sexes	5	rep(sel)	2	39231.4	4.95	0.168
Night avg. bout length (min.)	Combined Sexes	5	sex	1	39393.3	4.97	0.1555
Night avg. bout length (min.)	Combined Sexes	5	sel*sex	1	9576.65	1.21	0.3862
Night avg. bout length (min.)	Combined Sexes	5	rep*sex(sel)	2	7922.75	1.09	0.3381
Night avg. bout length (min.)	Female	5	sel	1	697193	43.22	0.0224
Night avg. bout length (min.)	Female	5	rep(sel)	2	16130.6	2.17	0.1151
Night avg. bout length (min.)	Male	5	sel	1	908575	29.62	0.0321
Night avg. bout length (min.)	Male	5	rep(sel)	2	30675.9	4.28	0.0145
Night avg. bout length (min.)	Combined Sexes	6	sel	1	815667	23.55	0.0399
Night avg. bout length (min.)	Combined Sexes	6	rep(sel)	2	34642.9	0.6	0.6244
Night avg. bout length (min.)	Combined Sexes	6	sex	1	39396.6	0.68	0.4952
Night avg. bout length (min.)	Combined Sexes	6	sel*sex	1	13072.3	0.23	0.6808
Night avg. bout length (min.)	Combined Sexes	6	rep*sex(sel)	2	57596.1	8.83	0.0002
Night avg. bout length (min.)	Female	6	sel	1	314351	13.18	0.0682
Night avg. bout length (min.)	Female	6	rep(sel)	2	23859.7	3.6	0.0283
Night avg. bout length (min.)	Male	6	sel	1	512346	7.57	0.1106
Night avg. bout length (min.)	Male	6	rep(sel)	2	67708.6	10.57	<.0001
Night avg. bout length (min.)	Combined Sexes	7	sel	1	1.92617e+06	42.78	0.0226
Night avg. bout length (min.)	Combined Sexes	7	rep(sel)	2	45025.5	2.08	0.3252
Night avg. bout length (min.)	Combined Sexes	7	sex	1	124455	5.74	0.1389
Night avg. bout length (min.)	Combined Sexes	7	sel*sex	1	61881.8	2.85	0.2333
Night avg. bout length (min.)	Combined Sexes	7	rep*sex(sel)	2	21698.8	3.03	0.0488
Night avg. bout length (min.)	Female	7	sel	1	635415	185.98	0.0053
Night avg. bout length (min.)	Female	7	rep(sel)	2	3415.75	0.49	0.6149
Night avg. bout length (min.)	Male	7	sel	1	1.36805e+06	21.27	0.0439
Night avg. bout length (min.)	Male	7	rep(sel)	2	64317.6	8.82	0.0002
Night avg. bout length (min.)	Combined Sexes	8	sel	1	2.09431e+06	13.43	0.0671
Night avg. bout length (min.)	Combined Sexes	8	rep(sel)	2	156007	5.14	0.1629
Night avg. bout length (min.)	Combined Sexes	8	sex	1	88222.4	2.91	0.2303
Night avg. bout length (min.)	Combined Sexes	8	sel*sex	1	52453	1.73	0.3191
Night avg. bout length (min.)	Combined Sexes	8	rep*sex(sel)	2	30352.5	5.48	0.0043
Night avg. bout length (min.)	Female	8	sel	1	726959	30.67	0.0311
Night avg. bout length (min.)	Female	8	rep(sel)	2	23705.9	4.94	0.0076
Night avg. bout length (min.)	Male	8	sel	1	1.43438e+06	8.61	0.0992
Night avg. bout length (min.)	Male	8	rep(sel)	2	166685	26.67	<.0001
Night avg. bout length (min.)	Combined Sexes	9	sel	1	1.97698e+06	51.43	0.0189
Night avg. bout length (min.)	Combined Sexes	9	rep(sel)	2	38438.8	4.85	0.1709
Night avg. bout length (min.)	Combined Sexes	9	sex	1	59598.9	7.52	0.1112
Night avg. bout length (min.)	Combined Sexes	9	sel*sex	1	14401	1.82	0.31
Night avg. bout length (min.)	Combined Sexes	9	rep*sex(sel)	2	7923.95	1.83	0.1613
Night avg. bout length (min.)	Female	9	sel	1	832125	20.85	0.0448
Night avg. bout length (min.)	Female	9	rep(sel)	2	39922.7	9.69	<.0001
Night avg. bout length (min.)	Male	9	sel	1	1.15724e+06	177.65	0.0056
Night avg. bout length (min.)	Male	9	rep(sel)	2	6514.25	1.43	0.24
Night avg. bout length (min.)	Combined Sexes	10	sel	1	1.62593e+06	146.96	0.0067
Night avg. bout length (min.)	Combined Sexes	10	rep(sel)	2	11063.9	0.33	0.7528
Night avg. bout length (min.)	Combined Sexes	10	sex	1	1412.28	0.04	0.8567
Night avg. bout length (min.)	Combined Sexes	10	sel*sex	1	7001.37	0.21	0.6932
Night avg. bout length (min.)	Combined Sexes	10	rep*sex(sel)	2	33685.1	5.89	0.0029
Night avg. bout length (min.)	Female	10	sel	1	907457	131.54	0.0075
Night avg. bout length (min.)	Female	10	rep(sel)	2	6898.74	0.96	0.3827
Night avg. bout length (min.)	Male	10	sel	1	722269	18.74	0.0494
Night avg. bout length (min.)	Male	10	rep(sel)	2	38544.7	8.94	0.0002
Night avg. bout length (min.)	Combined Sexes	11	sel	1	3.4773e+06	12.17	0.0733
Night avg. bout length (min.)	Combined Sexes	11	rep(sel)	2	285779	1.39	0.4184
Night avg. bout length (min.)	Combined Sexes	11	sex	1	3689.19	0.02	0.9057
Night avg. bout length (min.)	Combined Sexes	11	sel*sex	1	2163.48	0.01	0.9277
Night avg. bout length (min.)	Combined Sexes	11	rep*sex(sel)	2	205582	33.14	<.0001
Night avg. bout length (min.)	Female	11	sel	1	1.81162e+06	3.72	0.1934
Night avg. bout length (min.)	Female	11	rep(sel)	2	486456	77.11	<.0001
Night avg. bout length (min.)	Male	11	sel	1	1.66666e+06	482.21	0.0021
Night avg. bout length (min.)	Male	11	rep(sel)	2	3456.18	0.57	0.5679
Night avg. bout length (min.)	Combined Sexes	12	sel	1	5.96204e+06	191.56	0.0052
Night avg. bout length (min.)	Combined Sexes	12	rep(sel)	2	31133	0.24	0.8038
Night avg. bout length (min.)	Combined Sexes	12	sex	1	238049	1.87	0.3052
Night avg. bout length (min.)	Combined Sexes	12	sel*sex	1	120508	0.94	0.4335
Night avg. bout length (min.)	Combined Sexes	12	rep*sex(sel)	2	127585	12.32	<.0001
Night avg. bout length (min.)	Female	12	sel	1	2.04802e+06	121.6	0.0081
Night avg. bout length (min.)	Female	12	rep(sel)	2	16857.4	1.9	0.152
Night avg. bout length (min.)	Male	12	sel	1	4.18659e+06	28.22	0.0337
Night avg. bout length (min.)	Male	12	rep(sel)	2	148377	12.76	<.0001
Night avg. bout length (min.)	Combined Sexes	13	sel	1	4.47701e+06	14.64	0.062
Night avg. bout length (min.)	Combined Sexes	13	rep(sel)	2	306084	12.13	0.0762
Night avg. bout length (min.)	Combined Sexes	13	sex	1	132944	5.27	0.1485
Night avg. bout length (min.)	Combined Sexes	13	sel*sex	1	67811.4	2.69	0.2427
Night avg. bout length (min.)	Combined Sexes	13	rep*sex(sel)	2	25241.9	3	0.0502
Night avg. bout length (min.)	Female	13	sel	1	1.68112e+06	6.85	0.1203
Night avg. bout length (min.)	Female	13	rep(sel)	2	245689	31.47	<.0001
Night avg. bout length (min.)	Male	13	sel	1	2.89275e+06	36.06	0.0266
Night avg. bout length (min.)	Male	13	rep(sel)	2	80343	8.96	0.0002
Day bout number	Combined Sexes	0	sel	1	142.806	0.15	0.7383
Day bout number	Combined Sexes	0	rep(sel)	2	971.46	1.32	0.4306
Day bout number	Combined Sexes	0	sex	1	1.63303	0	0.9667
Day bout number	Combined Sexes	0	sel*sex	1	171.58	0.23	0.6766
Day bout number	Combined Sexes	0	rep*sex(sel)	2	734.595	20.91	<.0001
Day bout number	Female	0	sel	1	0.649782	0	0.986
Day bout number	Female	0	rep(sel)	2	1665.24	43.8	<.0001
Day bout number	Male	0	sel	1	318.61	23.62	0.0398
Day bout number	Male	0	rep(sel)	2	13.4907	0.42	0.659
Day bout number	Combined Sexes	1	sel	1	17.1076	0.02	0.9061
Day bout number	Combined Sexes	1	rep(sel)	2	961.895	3.04	0.2476
Day bout number	Combined Sexes	1	sex	1	678.056	2.14	0.2808
Day bout number	Combined Sexes	1	sel*sex	1	51.1255	0.16	0.7266
Day bout number	Combined Sexes	1	rep*sex(sel)	2	316.507	7.88	0.0004
Day bout number	Female	1	sel	1	62.7906	0.06	0.8277
Day bout number	Female	1	rep(sel)	2	1025.98	20.65	<.0001
Day bout number	Male	1	sel	1	4.60838	0.02	0.9025
Day bout number	Male	1	rep(sel)	2	240.186	7.76	0.0005
Day bout number	Combined Sexes	2	sel	1	11.7411	0.01	0.9258
Day bout number	Combined Sexes	2	rep(sel)	2	1061.85	0.54	0.6502
Day bout number	Combined Sexes	2	sex	1	0.607867	0	0.9876
Day bout number	Combined Sexes	2	sel*sex	1	87.2358	0.04	0.8529
Day bout number	Combined Sexes	2	rep*sex(sel)	2	1973.86	57.26	<.0001
Day bout number	Female	2	sel	1	80.9686	0.03	0.8834
Day bout number	Female	2	rep(sel)	2	2940.59	69.93	<.0001
Day bout number	Male	2	sel	1	17.5985	0.24	0.6729
Day bout number	Male	2	rep(sel)	2	73.4665	2.72	0.0671
Day bout number	Combined Sexes	3	sel	1	335.545	0.12	0.7626
Day bout number	Combined Sexes	3	rep(sel)	2	2810.12	1.98	0.3358
Day bout number	Combined Sexes	3	sex	1	0.019481	0	0.9974
Day bout number	Combined Sexes	3	sel*sex	1	768.349	0.54	0.5387
Day bout number	Combined Sexes	3	rep*sex(sel)	2	1420.82	37.28	<.0001
Day bout number	Female	3	sel	1	1061.11	0.26	0.6603
Day bout number	Female	3	rep(sel)	2	4066.79	89.06	<.0001
Day bout number	Male	3	sel	1	44.1329	0.25	0.667
Day bout number	Male	3	rep(sel)	2	176.918	5.79	0.0033
Day bout number	Combined Sexes	4	sel	1	64.526	0.02	0.9006
Day bout number	Combined Sexes	4	rep(sel)	2	3230.78	1.08	0.4816
Day bout number	Combined Sexes	4	sex	1	1144.18	0.38	0.5999
Day bout number	Combined Sexes	4	sel*sex	1	1964.06	0.65	0.5035
Day bout number	Combined Sexes	4	rep*sex(sel)	2	3001.96	83.34	<.0001
Day bout number	Female	4	sel	1	651.505	0.11	0.7764
Day bout number	Female	4	rep(sel)	2	6191.39	139.56	<.0001
Day bout number	Male	4	sel	1	1384.72	327.9	0.003
Day bout number	Male	4	rep(sel)	2	4.22285	0.15	0.8594
Day bout number	Combined Sexes	5	sel	1	45.8147	0.02	0.8909
Day bout number	Combined Sexes	5	rep(sel)	2	1900.18	2.48	0.2877
Day bout number	Combined Sexes	5	sex	1	292.669	0.38	0.5998
Day bout number	Combined Sexes	5	sel*sex	1	1913.74	2.49	0.255
Day bout number	Combined Sexes	5	rep*sex(sel)	2	767.373	21.81	<.0001
Day bout number	Female	5	sel	1	1303.67	0.5	0.5525
Day bout number	Female	5	rep(sel)	2	2602.55	59.99	<.0001
Day bout number	Male	5	sel	1	669.4	5.42	0.1452
Day bout number	Male	5	rep(sel)	2	123.458	4.63	0.0103
Day bout number	Combined Sexes	6	sel	1	32.1454	0.01	0.9372
Day bout number	Combined Sexes	6	rep(sel)	2	4059.46	5.1	0.164
Day bout number	Combined Sexes	6	sex	1	685.623	0.86	0.4514
Day bout number	Combined Sexes	6	sel*sex	1	885.136	1.11	0.4023
Day bout number	Combined Sexes	6	rep*sex(sel)	2	796.35	20.97	<.0001
Day bout number	Female	6	sel	1	292.982	0.07	0.8166
Day bout number	Female	6	rep(sel)	2	4207.89	95.33	<.0001
Day bout number	Male	6	sel	1	620.918	0.89	0.4446
Day bout number	Male	6	rep(sel)	2	696.195	21.98	<.0001
Day bout number	Combined Sexes	7	sel	1	27.7421	0.02	0.9097
Day bout number	Combined Sexes	7	rep(sel)	2	1686.54	14.27	0.0655
Day bout number	Combined Sexes	7	sex	1	77.4564	0.66	0.5032
Day bout number	Combined Sexes	7	sel*sex	1	1805.12	15.27	0.0597
Day bout number	Combined Sexes	7	rep*sex(sel)	2	118.208	2.98	0.0512
Day bout number	Female	7	sel	1	1116.72	0.85	0.4531
Day bout number	Female	7	rep(sel)	2	1308.86	25.63	<.0001
Day bout number	Male	7	sel	1	707.533	1.47	0.3492
Day bout number	Male	7	rep(sel)	2	481.588	16.82	<.0001
Day bout number	Combined Sexes	8	sel	1	356.614	0.11	0.7754
Day bout number	Combined Sexes	8	rep(sel)	2	3357.33	5.56	0.1523
Day bout number	Combined Sexes	8	sex	1	429.213	0.71	0.4877
Day bout number	Combined Sexes	8	sel*sex	1	2621.88	4.35	0.1724
Day bout number	Combined Sexes	8	rep*sex(sel)	2	603.334	18.05	<.0001
Day bout number	Female	8	sel	1	2409.98	0.76	0.4751
Day bout number	Female	8	rep(sel)	2	3168.98	84.65	<.0001
Day bout number	Male	8	sel	1	532.507	0.73	0.4839
Day bout number	Male	8	rep(sel)	2	733.892	24.81	<.0001
Day bout number	Combined Sexes	9	sel	1	1138.35	0.74	0.4802
Day bout number	Combined Sexes	9	rep(sel)	2	1537.22	1.33	0.4299
Day bout number	Combined Sexes	9	sex	1	14.9485	0.01	0.92
Day bout number	Combined Sexes	9	sel*sex	1	2813.22	2.43	0.2596
Day bout number	Combined Sexes	9	rep*sex(sel)	2	1159.29	38.43	<.0001
Day bout number	Female	9	sel	1	3788.84	1.42	0.3553
Day bout number	Female	9	rep(sel)	2	2663.06	75.37	<.0001
Day bout number	Male	9	sel	1	185.101	4.3	0.1737
Day bout number	Male	9	rep(sel)	2	43.0036	1.73	0.1796
Day bout number	Combined Sexes	10	sel	1	149.646	0.02	0.8901
Day bout number	Combined Sexes	10	rep(sel)	2	6120.72	25.01	0.0384
Day bout number	Combined Sexes	10	sex	1	21.3266	0.09	0.7957
Day bout number	Combined Sexes	10	sel*sex	1	654.728	2.68	0.2435
Day bout number	Combined Sexes	10	rep*sex(sel)	2	244.736	6.99	0.001
Day bout number	Female	10	sel	1	701.292	0.16	0.7259
Day bout number	Female	10	rep(sel)	2	4317.27	110.03	<.0001
Day bout number	Male	10	sel	1	90.978	0.05	0.8509
Day bout number	Male	10	rep(sel)	2	2000.26	64.54	<.0001
Day bout number	Combined Sexes	11	sel	1	87.3238	0.03	0.8706
Day bout number	Combined Sexes	11	rep(sel)	2	2563.87	1.8	0.3569
Day bout number	Combined Sexes	11	sex	1	90.7712	0.06	0.8242
Day bout number	Combined Sexes	11	sel*sex	1	531.263	0.37	0.6033
Day bout number	Combined Sexes	11	rep*sex(sel)	2	1422.63	39.89	<.0001
Day bout number	Female	11	sel	1	93.2641	0.03	0.8845
Day bout number	Female	11	rep(sel)	2	3446.24	85.51	<.0001
Day bout number	Male	11	sel	1	528.315	1.02	0.4188
Day bout number	Male	11	rep(sel)	2	517.997	16.67	<.0001
Day bout number	Combined Sexes	12	sel	1	142.602	0.07	0.8176
Day bout number	Combined Sexes	12	rep(sel)	2	2071.18	2.46	0.2889
Day bout number	Combined Sexes	12	sex	1	361.185	0.43	0.5796
Day bout number	Combined Sexes	12	sel*sex	1	393.684	0.47	0.5645
Day bout number	Combined Sexes	12	rep*sex(sel)	2	841.467	27.27	<.0001
Day bout number	Female	12	sel	1	471.965	0.19	0.7073
Day bout number	Female	12	rep(sel)	2	2522.1	63.69	<.0001
Day bout number	Male	12	sel	1	33.5586	0.15	0.7394
Day bout number	Male	12	rep(sel)	2	230.243	9.9	<.0001
Day bout number	Combined Sexes	13	sel	1	500.373	0.28	0.6523
Day bout number	Combined Sexes	13	rep(sel)	2	1820.08	1.71	0.3696
Day bout number	Combined Sexes	13	sex	1	142.514	0.13	0.7498
Day bout number	Combined Sexes	13	sel*sex	1	991.225	0.93	0.4368
Day bout number	Combined Sexes	13	rep*sex(sel)	2	1067.18	31.93	<.0001
Day bout number	Female	13	sel	1	1413.22	0.51	0.5481
Day bout number	Female	13	rep(sel)	2	2754.38	63.53	<.0001
Day bout number	Male	13	sel	1	42.6507	0.75	0.4768
Day bout number	Male	13	rep(sel)	2	56.6146	2.36	0.0961
Night bout number	Combined Sexes	0	sel	1	35.7783	0.15	0.7365
Night bout number	Combined Sexes	0	rep(sel)	2	239.8	1.07	0.4822
Night bout number	Combined Sexes	0	sex	1	2846.72	12.75	0.0703
Night bout number	Combined Sexes	0	sel*sex	1	82.617	0.37	0.6049
Night bout number	Combined Sexes	0	rep*sex(sel)	2	223.313	5.97	0.0027
Night bout number	Female	0	sel	1	4.75658	0.01	0.9173
Night bout number	Female	0	rep(sel)	2	345.391	7.44	0.0007
Night bout number	Male	0	sel	1	115.334	1	0.4236
Night bout number	Male	0	rep(sel)	2	115.901	4.05	0.0183
Night bout number	Combined Sexes	1	sel	1	135.805	1.21	0.3856
Night bout number	Combined Sexes	1	rep(sel)	2	112.011	3.35	0.2301
Night bout number	Combined Sexes	1	sex	1	1096.48	32.74	0.0292
Night bout number	Combined Sexes	1	sel*sex	1	13.3097	0.4	0.5928
Night bout number	Combined Sexes	1	rep*sex(sel)	2	33.4858	0.96	0.3844
Night bout number	Female	1	sel	1	31.5893	0.72	0.4853
Night bout number	Female	1	rep(sel)	2	43.8305	1.11	0.3301
Night bout number	Male	1	sel	1	118.775	1.16	0.3943
Night bout number	Male	1	rep(sel)	2	102.483	3.34	0.0364
Night bout number	Combined Sexes	2	sel	1	652.427	4.47	0.1688
Night bout number	Combined Sexes	2	rep(sel)	2	146.008	1.71	0.3696
Night bout number	Combined Sexes	2	sex	1	6227.01	72.76	0.0134
Night bout number	Combined Sexes	2	sel*sex	1	228.362	2.67	0.2439
Night bout number	Combined Sexes	2	rep*sex(sel)	2	85.6145	2.45	0.0872
Night bout number	Female	2	sel	1	54.0534	0.52	0.5459
Night bout number	Female	2	rep(sel)	2	104.113	2.36	0.0956
Night bout number	Male	2	sel	1	831.765	6.51	0.1254
Night bout number	Male	2	rep(sel)	2	127.913	4.92	0.0078
Night bout number	Combined Sexes	3	sel	1	1743.1	25.02	0.0377
Night bout number	Combined Sexes	3	rep(sel)	2	69.6713	0.15	0.8706
Night bout number	Combined Sexes	3	sex	1	1851.22	3.95	0.1852
Night bout number	Combined Sexes	3	sel*sex	1	87.4686	0.19	0.7078
Night bout number	Combined Sexes	3	rep*sex(sel)	2	468.611	12.37	<.0001
Night bout number	Female	3	sel	1	1307.49	2.91	0.2303
Night bout number	Female	3	rep(sel)	2	449.811	11.08	<.0001
Night bout number	Male	3	sel	1	524.115	5.91	0.1356
Night bout number	Male	3	rep(sel)	2	88.6978	2.52	0.0816
Night bout number	Combined Sexes	4	sel	1	2633.33	7.24	0.1148
Night bout number	Combined Sexes	4	rep(sel)	2	363.496	0.56	0.6408
Night bout number	Combined Sexes	4	sex	1	3729.03	5.75	0.1386
Night bout number	Combined Sexes	4	sel*sex	1	28.0469	0.04	0.8545
Night bout number	Combined Sexes	4	rep*sex(sel)	2	648.359	16.64	<.0001
Night bout number	Female	4	sel	1	1585.92	1.91	0.3006
Night bout number	Female	4	rep(sel)	2	828.575	16.85	<.0001
Night bout number	Male	4	sel	1	1070.08	6.18	0.1307
Night bout number	Male	4	rep(sel)	2	173.03	5.98	0.0028
Night bout number	Combined Sexes	5	sel	1	1685.1	27.5	0.0345
Night bout number	Combined Sexes	5	rep(sel)	2	61.2711	0.23	0.8117
Night bout number	Combined Sexes	5	sex	1	1188.66	4.5	0.1679
Night bout number	Combined Sexes	5	sel*sex	1	23.9996	0.09	0.7915
Night bout number	Combined Sexes	5	rep*sex(sel)	2	264.154	7.03	0.0009
Night bout number	Female	5	sel	1	667.683	3.25	0.2132
Night bout number	Female	5	rep(sel)	2	205.385	4.71	0.0095
Night bout number	Male	5	sel	1	1033.61	8.52	0.1001
Night bout number	Male	5	rep(sel)	2	121.379	3.88	0.0216
Night bout number	Combined Sexes	6	sel	1	52.9348	0.43	0.5778
Night bout number	Combined Sexes	6	rep(sel)	2	121.989	0.59	0.6295
Night bout number	Combined Sexes	6	sex	1	2097.06	10.12	0.0862
Night bout number	Combined Sexes	6	sel*sex	1	2.53396	0.01	0.9221
Night bout number	Combined Sexes	6	rep*sex(sel)	2	207.277	5.16	0.006
Night bout number	Female	6	sel	1	16.3211	0.26	0.6594
Night bout number	Female	6	rep(sel)	2	62.1952	1.24	0.2909
Night bout number	Male	6	sel	1	38.9147	0.15	0.7387
Night bout number	Male	6	rep(sel)	2	265.639	8.86	0.0002
Night bout number	Combined Sexes	7	sel	1	2055.73	6.78	0.1212
Night bout number	Combined Sexes	7	rep(sel)	2	303.065	2.05	0.3277
Night bout number	Combined Sexes	7	sex	1	4119.57	27.89	0.034
Night bout number	Combined Sexes	7	sel*sex	1	68.7288	0.47	0.5656
Night bout number	Combined Sexes	7	rep*sex(sel)	2	147.746	5.5	0.0042
Night bout number	Female	7	sel	1	1408.48	4.02	0.1829
Night bout number	Female	7	rep(sel)	2	350.675	10.1	<.0001
Night bout number	Male	7	sel	1	701.094	7.35	0.1134
Night bout number	Male	7	rep(sel)	2	95.3899	4.95	0.0076
Night bout number	Combined Sexes	8	sel	1	406.216	1.26	0.3782
Night bout number	Combined Sexes	8	rep(sel)	2	322.238	7.16	0.1225
Night bout number	Combined Sexes	8	sex	1	1265.82	28.14	0.0337
Night bout number	Combined Sexes	8	sel*sex	1	220.876	4.91	0.157
Night bout number	Combined Sexes	8	rep*sex(sel)	2	44.9898	1.4	0.2484
Night bout number	Female	8	sel	1	13.7439	0.11	0.7752
Night bout number	Female	8	rep(sel)	2	129.065	3.3	0.0379
Night bout number	Male	8	sel	1	625.072	2.59	0.249
Night bout number	Male	8	rep(sel)	2	241.823	9.42	0.0001
Night bout number	Combined Sexes	9	sel	1	525.829	0.54	0.5384
Night bout number	Combined Sexes	9	rep(sel)	2	970.934	24.73	0.0389
Night bout number	Combined Sexes	9	sex	1	2009.03	51.17	0.019
Night bout number	Combined Sexes	9	sel*sex	1	8.6443	0.22	0.6851
Night bout number	Combined Sexes	9	rep*sex(sel)	2	39.2629	1.16	0.3146
Night bout number	Female	9	sel	1	336.748	0.48	0.5589
Night bout number	Female	9	rep(sel)	2	697.159	16.33	<.0001
Night bout number	Male	9	sel	1	198.584	0.63	0.5098
Night bout number	Male	9	rep(sel)	2	313.983	12.56	<.0001
Night bout number	Combined Sexes	10	sel	1	118.529	1.94	0.298
Night bout number	Combined Sexes	10	rep(sel)	2	60.9891	0.26	0.7911
Night bout number	Combined Sexes	10	sex	1	1622.4	7.02	0.1178
Night bout number	Combined Sexes	10	sel*sex	1	239.229	1.04	0.4159
Night bout number	Combined Sexes	10	rep*sex(sel)	2	231.023	6.06	0.0025
Night bout number	Female	10	sel	1	340.516	3.39	0.2068
Night bout number	Female	10	rep(sel)	2	100.368	2.14	0.1187
Night bout number	Male	10	sel	1	10.7001	0.06	0.836
Night bout number	Male	10	rep(sel)	2	193.494	6.5	0.0017
Night bout number	Combined Sexes	11	sel	1	1629.93	1.09	0.4069
Night bout number	Combined Sexes	11	rep(sel)	2	1501.56	2.18	0.3147
Night bout number	Combined Sexes	11	sex	1	2473.64	3.59	0.1987
Night bout number	Combined Sexes	11	sel*sex	1	265.065	0.38	0.5985
Night bout number	Combined Sexes	11	rep*sex(sel)	2	689.508	23.18	<.0001
Night bout number	Female	11	sel	1	1593.83	0.77	0.4726
Night bout number	Female	11	rep(sel)	2	2068.04	58.51	<.0001
Night bout number	Male	11	sel	1	292.21	2.49	0.2553
Night bout number	Male	11	rep(sel)	2	117.329	4.84	0.0084
Night bout number	Combined Sexes	12	sel	1	866.645	2.71	0.2416
Night bout number	Combined Sexes	12	rep(sel)	2	320.061	1.35	0.4251
Night bout number	Combined Sexes	12	sex	1	2547.56	10.77	0.0816
Night bout number	Combined Sexes	12	sel*sex	1	65.4599	0.28	0.6514
Night bout number	Combined Sexes	12	rep*sex(sel)	2	236.634	9.37	<.0001
Night bout number	Female	12	sel	1	658.059	1.35	0.3651
Night bout number	Female	12	rep(sel)	2	487.825	13.26	<.0001
Night bout number	Male	12	sel	1	245.067	7.16	0.1158
Night bout number	Male	12	rep(sel)	2	34.2088	2.25	0.1071
Night bout number	Combined Sexes	13	sel	1	4.62622	0	0.9535
Night bout number	Combined Sexes	13	rep(sel)	2	1069.86	6.09	0.1411
Night bout number	Combined Sexes	13	sex	1	2540.45	14.47	0.0627
Night bout number	Combined Sexes	13	sel*sex	1	3.83763	0.02	0.896
Night bout number	Combined Sexes	13	rep*sex(sel)	2	175.689	5.56	0.004
Night bout number	Female	13	sel	1	0.0179408	0	0.9969
Night bout number	Female	13	rep(sel)	2	940.423	21.45	<.0001
Night bout number	Male	13	sel	1	8.67149	0.03	0.8771
Night bout number	Male	13	rep(sel)	2	283.034	14.11	<.0001
Day sleep (min.)	Combined Sexes	0	sel	1	2018.3	0	0.965
Day sleep (min.)	Combined Sexes	0	rep(sel)	2	823969	31.06	0.0312
Day sleep (min.)	Combined Sexes	0	sex	1	5.40379e+06	203.73	0.0049
Day sleep (min.)	Combined Sexes	0	sel*sex	1	12596.9	0.47	0.5619
Day sleep (min.)	Combined Sexes	0	rep*sex(sel)	2	26524.9	2.16	0.1159
Day sleep (min.)	Female	0	sel	1	12163.4	0.02	0.8968
Day sleep (min.)	Female	0	rep(sel)	2	564842	48.04	<.0001
Day sleep (min.)	Male	0	sel	1	2300.62	0.01	0.9362
Day sleep (min.)	Male	0	rep(sel)	2	281789	22.06	<.0001
Day sleep (min.)	Combined Sexes	1	sel	1	224867	0.16	0.7295
Day sleep (min.)	Combined Sexes	1	rep(sel)	2	1.42406e+06	72.28	0.0136
Day sleep (min.)	Combined Sexes	1	sex	1	4.24916e+06	215.68	0.0046
Day sleep (min.)	Combined Sexes	1	sel*sex	1	3989.09	0.2	0.6968
Day sleep (min.)	Combined Sexes	1	rep*sex(sel)	2	19702.5	1.53	0.2169
Day sleep (min.)	Female	1	sel	1	83284	0.1	0.7792
Day sleep (min.)	Female	1	rep(sel)	2	812362	61.46	<.0001
Day sleep (min.)	Male	1	sel	1	146479	0.23	0.6769
Day sleep (min.)	Male	1	rep(sel)	2	628435	50.19	<.0001
Day sleep (min.)	Combined Sexes	2	sel	1	793869	0.55	0.5359
Day sleep (min.)	Combined Sexes	2	rep(sel)	2	1.44667e+06	10.09	0.0901
Day sleep (min.)	Combined Sexes	2	sex	1	4.60032e+06	32.12	0.0297
Day sleep (min.)	Combined Sexes	2	sel*sex	1	49947.1	0.35	0.6147
Day sleep (min.)	Combined Sexes	2	rep*sex(sel)	2	143308	15.44	<.0001
Day sleep (min.)	Female	2	sel	1	221350	0.18	0.7099
Day sleep (min.)	Female	2	rep(sel)	2	1.20499e+06	140.85	<.0001
Day sleep (min.)	Male	2	sel	1	625077	1.65	0.3274
Day sleep (min.)	Male	2	rep(sel)	2	378613	37.87	<.0001
Day sleep (min.)	Combined Sexes	3	sel	1	1.09313e+06	0.75	0.4775
Day sleep (min.)	Combined Sexes	3	rep(sel)	2	1.45526e+06	17.56	0.0539
Day sleep (min.)	Combined Sexes	3	sex	1	4.32753e+06	52.23	0.0186
Day sleep (min.)	Combined Sexes	3	sel*sex	1	52966.5	0.64	0.5079
Day sleep (min.)	Combined Sexes	3	rep*sex(sel)	2	82861.7	8.46	0.0002
Day sleep (min.)	Female	3	sel	1	814756	0.73	0.4837
Day sleep (min.)	Female	3	rep(sel)	2	1.12111e+06	131.02	<.0001
Day sleep (min.)	Male	3	sel	1	331984	0.79	0.4678
Day sleep (min.)	Male	3	rep(sel)	2	420097	38.06	<.0001
Day sleep (min.)	Combined Sexes	4	sel	1	2.02502e+06	0.82	0.4618
Day sleep (min.)	Combined Sexes	4	rep(sel)	2	2.48343e+06	17.19	0.055
Day sleep (min.)	Combined Sexes	4	sex	1	4.79211e+06	33.18	0.0288
Day sleep (min.)	Combined Sexes	4	sel*sex	1	10583.8	0.07	0.812
Day sleep (min.)	Combined Sexes	4	rep*sex(sel)	2	144429	14.43	<.0001
Day sleep (min.)	Female	4	sel	1	862412	0.45	0.5701
Day sleep (min.)	Female	4	rep(sel)	2	1.90291e+06	230.95	<.0001
Day sleep (min.)	Male	4	sel	1	1.17646e+06	1.63	0.3298
Day sleep (min.)	Male	4	rep(sel)	2	721196	61.41	<.0001
Day sleep (min.)	Combined Sexes	5	sel	1	2.09514e+06	1.95	0.2972
Day sleep (min.)	Combined Sexes	5	rep(sel)	2	1.07361e+06	23.6	0.0406
Day sleep (min.)	Combined Sexes	5	sex	1	3.34515e+06	73.55	0.0133
Day sleep (min.)	Combined Sexes	5	sel*sex	1	11002.5	0.24	0.6715
Day sleep (min.)	Combined Sexes	5	rep*sex(sel)	2	45483.2	4.54	0.0109
Day sleep (min.)	Female	5	sel	1	1.23115e+06	1.62	0.3305
Day sleep (min.)	Female	5	rep(sel)	2	757867	75.47	<.0001
Day sleep (min.)	Male	5	sel	1	882427	2.38	0.2627
Day sleep (min.)	Male	5	rep(sel)	2	370660	37.15	<.0001
Day sleep (min.)	Combined Sexes	6	sel	1	1.09802e+06	0.73	0.4827
Day sleep (min.)	Combined Sexes	6	rep(sel)	2	1.50283e+06	9.9	0.0917
Day sleep (min.)	Combined Sexes	6	sex	1	5.33493e+06	35.16	0.0273
Day sleep (min.)	Combined Sexes	6	sel*sex	1	67.3361	0	0.9851
Day sleep (min.)	Combined Sexes	6	rep*sex(sel)	2	151728	14.63	<.0001
Day sleep (min.)	Female	6	sel	1	546077	0.44	0.5747
Day sleep (min.)	Female	6	rep(sel)	2	1.23647e+06	130.94	<.0001
Day sleep (min.)	Male	6	sel	1	551950	1.27	0.3761
Day sleep (min.)	Male	6	rep(sel)	2	433058	38.28	<.0001
Day sleep (min.)	Combined Sexes	7	sel	1	1.978e+06	2.24	0.2728
Day sleep (min.)	Combined Sexes	7	rep(sel)	2	881262	13.3	0.0699
Day sleep (min.)	Combined Sexes	7	sex	1	4.90085e+06	73.97	0.0132
Day sleep (min.)	Combined Sexes	7	sel*sex	1	18921.2	0.29	0.6465
Day sleep (min.)	Combined Sexes	7	rep*sex(sel)	2	66258	5.52	0.0042
Day sleep (min.)	Female	7	sel	1	1.16736e+06	2.04	0.2895
Day sleep (min.)	Female	7	rep(sel)	2	572811	46.79	<.0001
Day sleep (min.)	Male	7	sel	1	822302	2.22	0.2747
Day sleep (min.)	Male	7	rep(sel)	2	370414	31.44	<.0001
Day sleep (min.)	Combined Sexes	8	sel	1	4.31728e+06	4.22	0.1762
Day sleep (min.)	Combined Sexes	8	rep(sel)	2	1.02214e+06	5.03	0.166
Day sleep (min.)	Combined Sexes	8	sex	1	3.69362e+06	18.17	0.0509
Day sleep (min.)	Combined Sexes	8	sel*sex	1	9144.92	0.04	0.8517
Day sleep (min.)	Combined Sexes	8	rep*sex(sel)	2	203393	24.11	<.0001
Day sleep (min.)	Female	8	sel	1	1.92754e+06	2	0.2933
Day sleep (min.)	Female	8	rep(sel)	2	966250	122.27	<.0001
Day sleep (min.)	Male	8	sel	1	2.40809e+06	10.08	0.0866
Day sleep (min.)	Male	8	rep(sel)	2	239174	26.72	<.0001
Day sleep (min.)	Combined Sexes	9	sel	1	6.38659e+06	10.05	0.0868
Day sleep (min.)	Combined Sexes	9	rep(sel)	2	635582	2.3	0.3032
Day sleep (min.)	Combined Sexes	9	sex	1	3.91531e+06	14.16	0.0639
Day sleep (min.)	Combined Sexes	9	sel*sex	1	3155.29	0.01	0.9247
Day sleep (min.)	Combined Sexes	9	rep*sex(sel)	2	276584	32.14	<.0001
Day sleep (min.)	Female	9	sel	1	3.35768e+06	3.86	0.1885
Day sleep (min.)	Female	9	rep(sel)	2	870558	129.87	<.0001
Day sleep (min.)	Male	9	sel	1	3.03408e+06	69.32	0.0141
Day sleep (min.)	Male	9	rep(sel)	2	43767	4.16	0.0164
Day sleep (min.)	Combined Sexes	10	sel	1	4.31436e+06	2.33	0.2662
Day sleep (min.)	Combined Sexes	10	rep(sel)	2	1.84954e+06	32.18	0.0301
Day sleep (min.)	Combined Sexes	10	sex	1	3.07412e+06	53.49	0.0182
Day sleep (min.)	Combined Sexes	10	sel*sex	1	6921.82	0.12	0.7617
Day sleep (min.)	Combined Sexes	10	rep*sex(sel)	2	57470.7	6.17	0.0022
Day sleep (min.)	Female	10	sel	1	1.94917e+06	1.57	0.337
Day sleep (min.)	Female	10	rep(sel)	2	1.24286e+06	154.32	<.0001
Day sleep (min.)	Male	10	sel	1	2.38066e+06	3.65	0.1961
Day sleep (min.)	Male	10	rep(sel)	2	651418	61.89	<.0001
Day sleep (min.)	Combined Sexes	11	sel	1	4.60156e+06	2.3	0.2683
Day sleep (min.)	Combined Sexes	11	rep(sel)	2	1.99668e+06	4.55	0.1802
Day sleep (min.)	Combined Sexes	11	sex	1	3.23534e+06	7.37	0.1131
Day sleep (min.)	Combined Sexes	11	sel*sex	1	9965.68	0.02	0.894
Day sleep (min.)	Combined Sexes	11	rep*sex(sel)	2	438828	54.26	<.0001
Day sleep (min.)	Female	11	sel	1	2.07733e+06	0.97	0.4285
Day sleep (min.)	Female	11	rep(sel)	2	2.14198e+06	281.55	<.0001
Day sleep (min.)	Male	11	sel	1	2.53736e+06	8.84	0.0969
Day sleep (min.)	Male	11	rep(sel)	2	286981	33.52	<.0001
Day sleep (min.)	Combined Sexes	12	sel	1	6.33614e+06	5.95	0.1349
Day sleep (min.)	Combined Sexes	12	rep(sel)	2	1.06505e+06	6	0.1429
Day sleep (min.)	Combined Sexes	12	sex	1	2.42784e+06	13.67	0.066
Day sleep (min.)	Combined Sexes	12	sel*sex	1	24624.9	0.14	0.7453
Day sleep (min.)	Combined Sexes	12	rep*sex(sel)	2	177589	17.59	<.0001
Day sleep (min.)	Female	12	sel	1	2.60275e+06	2.6	0.2482
Day sleep (min.)	Female	12	rep(sel)	2	1.00252e+06	94.23	<.0001
Day sleep (min.)	Male	12	sel	1	3.84519e+06	19.31	0.0481
Day sleep (min.)	Male	12	rep(sel)	2	199188	20.7	<.0001
Day sleep (min.)	Combined Sexes	13	sel	1	8.28187e+06	4.91	0.1571
Day sleep (min.)	Combined Sexes	13	rep(sel)	2	1.68861e+06	5.08	0.1646
Day sleep (min.)	Combined Sexes	13	sex	1	3.98516e+06	11.99	0.0743
Day sleep (min.)	Combined Sexes	13	sel*sex	1	24304.8	0.07	0.8122
Day sleep (min.)	Combined Sexes	13	rep*sex(sel)	2	332655	36.48	<.0001
Day sleep (min.)	Female	13	sel	1	3.61032e+06	2.2	0.2764
Day sleep (min.)	Female	13	rep(sel)	2	1.64254e+06	197.47	<.0001
Day sleep (min.)	Male	13	sel	1	4.72491e+06	14.05	0.0644
Day sleep (min.)	Male	13	rep(sel)	2	336458	34.06	<.0001
Sleep latency (min.)	Combined Sexes	0	sel	1	286.793	0.02	0.8986
Sleep latency (min.)	Combined Sexes	0	rep(sel)	2	13798.3	20.13	0.0473
Sleep latency (min.)	Combined Sexes	0	sex	1	18543.5	27.05	0.035
Sleep latency (min.)	Combined Sexes	0	sel*sex	1	595.231	0.87	0.4498
Sleep latency (min.)	Combined Sexes	0	rep*sex(sel)	2	685.537	0.43	0.6523
Sleep latency (min.)	Female	0	sel	1	27.4231	0	0.9632
Sleep latency (min.)	Female	0	rep(sel)	2	10101.8	7.74	0.0005
Sleep latency (min.)	Male	0	sel	1	867.479	0.2	0.6981
Sleep latency (min.)	Male	0	rep(sel)	2	4326.58	2.28	0.1033
Sleep latency (min.)	Combined Sexes	1	sel	1	81471.8	10.24	0.0853
Sleep latency (min.)	Combined Sexes	1	rep(sel)	2	7958.45	6.06	0.1416
Sleep latency (min.)	Combined Sexes	1	sex	1	13234.3	10.09	0.0865
Sleep latency (min.)	Combined Sexes	1	sel*sex	1	1635.53	1.25	0.3804
Sleep latency (min.)	Combined Sexes	1	rep*sex(sel)	2	1312.29	1.13	0.3238
Sleep latency (min.)	Female	1	sel	1	29586.1	7.03	0.1177
Sleep latency (min.)	Female	1	rep(sel)	2	4210.25	3.23	0.0406
Sleep latency (min.)	Male	1	sel	1	53869.4	10.61	0.0827
Sleep latency (min.)	Male	1	rep(sel)	2	5078.35	4.95	0.0075
Sleep latency (min.)	Combined Sexes	2	sel	1	226019	44.09	0.0219
Sleep latency (min.)	Combined Sexes	2	rep(sel)	2	5128.36	21.98	0.0435
Sleep latency (min.)	Combined Sexes	2	sex	1	13818.2	59.05	0.0162
Sleep latency (min.)	Combined Sexes	2	sel*sex	1	104.842	0.45	0.5718
Sleep latency (min.)	Combined Sexes	2	rep*sex(sel)	2	233.322	0.18	0.8393
Sleep latency (min.)	Female	2	sel	1	107499	31.03	0.0307
Sleep latency (min.)	Female	2	rep(sel)	2	3465.55	2.09	0.1253
Sleep latency (min.)	Male	2	sel	1	118698	63.03	0.0155
Sleep latency (min.)	Male	2	rep(sel)	2	1883.79	1.87	0.1558
Sleep latency (min.)	Combined Sexes	3	sel	1	521382	81.92	0.012
Sleep latency (min.)	Combined Sexes	3	rep(sel)	2	6364.7	11.65	0.0791
Sleep latency (min.)	Combined Sexes	3	sex	1	119967	219.58	0.0045
Sleep latency (min.)	Combined Sexes	3	sel*sex	1	14834.8	27.15	0.0349
Sleep latency (min.)	Combined Sexes	3	rep*sex(sel)	2	546.347	0.39	0.6744
Sleep latency (min.)	Female	3	sel	1	180402	113.24	0.0087
Sleep latency (min.)	Female	3	rep(sel)	2	1593.1	1.5	0.2237
Sleep latency (min.)	Male	3	sel	1	355582	66.91	0.0146
Sleep latency (min.)	Male	3	rep(sel)	2	5313.96	3.1	0.0462
Sleep latency (min.)	Combined Sexes	4	sel	1	753142	316.01	0.0031
Sleep latency (min.)	Combined Sexes	4	rep(sel)	2	2383.3	0.06	0.9425
Sleep latency (min.)	Combined Sexes	4	sex	1	66291.4	1.7	0.3224
Sleep latency (min.)	Combined Sexes	4	sel*sex	1	5820.03	0.15	0.7366
Sleep latency (min.)	Combined Sexes	4	rep*sex(sel)	2	39038.1	20.24	<.0001
Sleep latency (min.)	Female	4	sel	1	310043	12.49	0.0716
Sleep latency (min.)	Female	4	rep(sel)	2	24827.9	14.8	<.0001
Sleep latency (min.)	Male	4	sel	1	450383	27.41	0.0346
Sleep latency (min.)	Male	4	rep(sel)	2	16431.2	7.55	0.0006
Sleep latency (min.)	Combined Sexes	5	sel	1	1.46086e+06	84.5	0.0116
Sleep latency (min.)	Combined Sexes	5	rep(sel)	2	17289.1	0.16	0.8589
Sleep latency (min.)	Combined Sexes	5	sex	1	12.7264	0	0.9922
Sleep latency (min.)	Combined Sexes	5	sel*sex	1	9937.16	0.09	0.7877
Sleep latency (min.)	Combined Sexes	5	rep*sex(sel)	2	105276	20.83	<.0001
Sleep latency (min.)	Female	5	sel	1	874533	42.74	0.0226
Sleep latency (min.)	Female	5	rep(sel)	2	20460	3.45	0.0329
Sleep latency (min.)	Male	5	sel	1	602078	5.96	0.1347
Sleep latency (min.)	Male	5	rep(sel)	2	101061	24.45	<.0001
Sleep latency (min.)	Combined Sexes	6	sel	1	1.69968e+06	49.95	0.0194
Sleep latency (min.)	Combined Sexes	6	rep(sel)	2	34028.7	1.84	0.3516
Sleep latency (min.)	Combined Sexes	6	sex	1	45901.5	2.49	0.2555
Sleep latency (min.)	Combined Sexes	6	sel*sex	1	1303.27	0.07	0.8153
Sleep latency (min.)	Combined Sexes	6	rep*sex(sel)	2	18454.8	3.93	0.02
Sleep latency (min.)	Female	6	sel	1	811799	15.95	0.0573
Sleep latency (min.)	Female	6	rep(sel)	2	50887.1	10.49	<.0001
Sleep latency (min.)	Male	6	sel	1	888396	515.18	0.0019
Sleep latency (min.)	Male	6	rep(sel)	2	1724.13	0.38	0.6841
Sleep latency (min.)	Combined Sexes	7	sel	1	1.88393e+06	50.27	0.0193
Sleep latency (min.)	Combined Sexes	7	rep(sel)	2	37480.3	57.04	0.0172
Sleep latency (min.)	Combined Sexes	7	sex	1	75437.6	114.75	0.0086
Sleep latency (min.)	Combined Sexes	7	sel*sex	1	43992.7	66.92	0.0146
Sleep latency (min.)	Combined Sexes	7	rep*sex(sel)	2	657.041	0.17	0.8438
Sleep latency (min.)	Female	7	sel	1	662146	48.18	0.0201
Sleep latency (min.)	Female	7	rep(sel)	2	13744.6	3.26	0.0393
Sleep latency (min.)	Male	7	sel	1	1.27875e+06	51.81	0.0188
Sleep latency (min.)	Male	7	rep(sel)	2	24680.9	6.97	0.0011
Sleep latency (min.)	Combined Sexes	8	sel	1	2.85272e+06	171.85	0.0058
Sleep latency (min.)	Combined Sexes	8	rep(sel)	2	16603.7	0.26	0.7919
Sleep latency (min.)	Combined Sexes	8	sex	1	2651.73	0.04	0.8566
Sleep latency (min.)	Combined Sexes	8	sel*sex	1	586.386	0.01	0.932
Sleep latency (min.)	Combined Sexes	8	rep*sex(sel)	2	63180.7	13.88	<.0001
Sleep latency (min.)	Female	8	sel	1	1.43994e+06	20.67	0.0451
Sleep latency (min.)	Female	8	rep(sel)	2	69676	10.53	<.0001
Sleep latency (min.)	Male	8	sel	1	1.41285e+06	149.63	0.0066
Sleep latency (min.)	Male	8	rep(sel)	2	9446.95	3.68	0.0261
Sleep latency (min.)	Combined Sexes	9	sel	1	3.67028e+06	28.73	0.0331
Sleep latency (min.)	Combined Sexes	9	rep(sel)	2	127757	181.5	0.0055
Sleep latency (min.)	Combined Sexes	9	sex	1	54775.2	77.8	0.0126
Sleep latency (min.)	Combined Sexes	9	sel*sex	1	29068	41.28	0.0233
Sleep latency (min.)	Combined Sexes	9	rep*sex(sel)	2	703.894	0.13	0.874
Sleep latency (min.)	Female	9	sel	1	1.53256e+06	22.78	0.0412
Sleep latency (min.)	Female	9	rep(sel)	2	67271.1	11.45	<.0001
Sleep latency (min.)	Male	9	sel	1	2.16288e+06	35.3	0.0272
Sleep latency (min.)	Male	9	rep(sel)	2	61269.2	13.42	<.0001
Sleep latency (min.)	Combined Sexes	10	sel	1	3.66479e+06	22.41	0.0418
Sleep latency (min.)	Combined Sexes	10	rep(sel)	2	163520	1.32	0.4314
Sleep latency (min.)	Combined Sexes	10	sex	1	327803	2.64	0.2456
Sleep latency (min.)	Combined Sexes	10	sel*sex	1	217928	1.76	0.3162
Sleep latency (min.)	Combined Sexes	10	rep*sex(sel)	2	124068	18.87	<.0001
Sleep latency (min.)	Female	10	sel	1	1.02731e+06	502.35	0.002
Sleep latency (min.)	Female	10	rep(sel)	2	2044.97	0.39	0.6765
Sleep latency (min.)	Male	10	sel	1	2.8924e+06	9.95	0.0875
Sleep latency (min.)	Male	10	rep(sel)	2	290644	36.91	<.0001
Sleep latency (min.)	Combined Sexes	11	sel	1	2.65311e+06	571.85	0.0017
Sleep latency (min.)	Combined Sexes	11	rep(sel)	2	4639.56	0.74	0.5759
Sleep latency (min.)	Combined Sexes	11	sex	1	229363	36.4	0.0264
Sleep latency (min.)	Combined Sexes	11	sel*sex	1	202321	32.11	0.0298
Sleep latency (min.)	Combined Sexes	11	rep*sex(sel)	2	6301.21	1.51	0.2218
Sleep latency (min.)	Female	11	sel	1	689414	68.74	0.0142
Sleep latency (min.)	Female	11	rep(sel)	2	10029.5	2.32	0.0998
Sleep latency (min.)	Male	11	sel	1	2.17822e+06	2769.62	0.0004
Sleep latency (min.)	Male	11	rep(sel)	2	786.381	0.2	0.8227
Sleep latency (min.)	Combined Sexes	12	sel	1	6.13188e+06	16.31	0.0562
Sleep latency (min.)	Combined Sexes	12	rep(sel)	2	376034	278.17	0.0036
Sleep latency (min.)	Combined Sexes	12	sex	1	124858	92.21	0.0105
Sleep latency (min.)	Combined Sexes	12	sel*sex	1	117362	86.68	0.0112
Sleep latency (min.)	Combined Sexes	12	rep*sex(sel)	2	1351.81	0.17	0.8477
Sleep latency (min.)	Female	12	sel	1	2.132e+06	13.71	0.0658
Sleep latency (min.)	Female	12	rep(sel)	2	155737	18.4	<.0001
Sleep latency (min.)	Male	12	sel	1	4.26136e+06	18.7	0.0495
Sleep latency (min.)	Male	12	rep(sel)	2	227842	28.7	<.0001
Sleep latency (min.)	Combined Sexes	13	sel	1	7.12893e+06	14.69	0.0618
Sleep latency (min.)	Combined Sexes	13	rep(sel)	2	485514	19.34	0.0492
Sleep latency (min.)	Combined Sexes	13	sex	1	435976	17.38	0.053
Sleep latency (min.)	Combined Sexes	13	sel*sex	1	350480	13.97	0.0647
Sleep latency (min.)	Combined Sexes	13	rep*sex(sel)	2	25102.7	2.99	0.0511
Sleep latency (min.)	Female	13	sel	1	2.09473e+06	14.77	0.0615
Sleep latency (min.)	Female	13	rep(sel)	2	141935	16.23	<.0001
Sleep latency (min.)	Male	13	sel	1	5.48884e+06	14.63	0.0621
Sleep latency (min.)	Male	13	rep(sel)	2	375549	46.45	<.0001
Waking activity (cts./min.)	Combined Sexes	0	sel	1	0.00574378	0.04	0.865
Waking activity (cts./min.)	Combined Sexes	0	rep(sel)	2	0.154624	0.62	0.618
Waking activity (cts./min.)	Combined Sexes	0	sex	1	47.9026	191.47	0.0052
Waking activity (cts./min.)	Combined Sexes	0	sel*sex	1	0.0996072	0.4	0.5925
Waking activity (cts./min.)	Combined Sexes	0	rep*sex(sel)	2	0.250187	1.7	0.1833
Waking activity (cts./min.)	Female	0	sel	1	0.0283222	0.11	0.7705
Waking activity (cts./min.)	Female	0	rep(sel)	2	0.254773	2.63	0.0737
Waking activity (cts./min.)	Male	0	sel	1	0.0777871	0.53	0.5425
Waking activity (cts./min.)	Male	0	rep(sel)	2	0.146939	0.75	0.473
Waking activity (cts./min.)	Combined Sexes	1	sel	1	0.330845	0.6	0.5202
Waking activity (cts./min.)	Combined Sexes	1	rep(sel)	2	0.553151	11.72	0.0786
Waking activity (cts./min.)	Combined Sexes	1	sex	1	46.786	991.1	0.001
Waking activity (cts./min.)	Combined Sexes	1	sel*sex	1	0.00732945	0.16	0.7316
Waking activity (cts./min.)	Combined Sexes	1	rep*sex(sel)	2	0.0471941	0.34	0.7085
Waking activity (cts./min.)	Female	1	sel	1	0.215245	0.92	0.4393
Waking activity (cts./min.)	Female	1	rep(sel)	2	0.234739	2.6	0.076
Waking activity (cts./min.)	Male	1	sel	1	0.121587	0.33	0.6233
Waking activity (cts./min.)	Male	1	rep(sel)	2	0.367619	2.02	0.134
Waking activity (cts./min.)	Combined Sexes	2	sel	1	0.396975	0.11	0.7677
Waking activity (cts./min.)	Combined Sexes	2	rep(sel)	2	3.48134	2.59	0.2785
Waking activity (cts./min.)	Combined Sexes	2	sex	1	39.6375	29.52	0.0322
Waking activity (cts./min.)	Combined Sexes	2	sel*sex	1	0.332004	0.25	0.6683
Waking activity (cts./min.)	Combined Sexes	2	rep*sex(sel)	2	1.34352	7.56	0.0006
Waking activity (cts./min.)	Female	2	sel	1	0.00144123	0	0.9828
Waking activity (cts./min.)	Female	2	rep(sel)	2	2.42662	24	<.0001
Waking activity (cts./min.)	Male	2	sel	1	0.732263	0.31	0.6357
Waking activity (cts./min.)	Male	2	rep(sel)	2	2.39471	9.45	<.0001
Waking activity (cts./min.)	Combined Sexes	3	sel	1	4.95442	1.36	0.364
Waking activity (cts./min.)	Combined Sexes	3	rep(sel)	2	3.64664	55.65	0.0177
Waking activity (cts./min.)	Combined Sexes	3	sex	1	56.9122	868.55	0.0011
Waking activity (cts./min.)	Combined Sexes	3	sel*sex	1	1.00051	15.27	0.0597
Waking activity (cts./min.)	Combined Sexes	3	rep*sex(sel)	2	0.0655238	0.37	0.6889
Waking activity (cts./min.)	Female	3	sel	1	0.752047	0.38	0.6025
Waking activity (cts./min.)	Female	3	rep(sel)	2	2.00371	16.78	<.0001
Waking activity (cts./min.)	Male	3	sel	1	5.19696	3.04	0.2232
Waking activity (cts./min.)	Male	3	rep(sel)	2	1.70771	7.35	0.0007
Waking activity (cts./min.)	Combined Sexes	4	sel	1	1.25793	2.76	0.2387
Waking activity (cts./min.)	Combined Sexes	4	rep(sel)	2	0.456152	0.65	0.6062
Waking activity (cts./min.)	Combined Sexes	4	sex	1	55.0079	78.34	0.0125
Waking activity (cts./min.)	Combined Sexes	4	sel*sex	1	1.24451e-05	0	0.997
Waking activity (cts./min.)	Combined Sexes	4	rep*sex(sel)	2	0.702213	6.34	0.0019
Waking activity (cts./min.)	Female	4	sel	1	0.618566	4.15	0.1784
Waking activity (cts./min.)	Female	4	rep(sel)	2	0.148997	2.29	0.1023
Waking activity (cts./min.)	Male	4	sel	1	0.639595	0.62	0.513
Waking activity (cts./min.)	Male	4	rep(sel)	2	1.02858	6.6	0.0015
Waking activity (cts./min.)	Combined Sexes	5	sel	1	2.72023	0.49	0.5548
Waking activity (cts./min.)	Combined Sexes	5	rep(sel)	2	5.50271	5.94	0.1441
Waking activity (cts./min.)	Combined Sexes	5	sex	1	52.9572	57.16	0.017
Waking activity (cts./min.)	Combined Sexes	5	sel*sex	1	0.0542034	0.06	0.8314
Waking activity (cts./min.)	Combined Sexes	5	rep*sex(sel)	2	0.92653	6.85	0.0011
Waking activity (cts./min.)	Female	5	sel	1	1.80979	0.55	0.5368
Waking activity (cts./min.)	Female	5	rep(sel)	2	3.31209	36.61	<.0001
Waking activity (cts./min.)	Male	5	sel	1	0.982287	0.32	0.6294
Waking activity (cts./min.)	Male	5	rep(sel)	2	3.08541	16.97	<.0001
Waking activity (cts./min.)	Combined Sexes	6	sel	1	6.45326	0.79	0.467
Waking activity (cts./min.)	Combined Sexes	6	rep(sel)	2	8.13161	19.97	0.0477
Waking activity (cts./min.)	Combined Sexes	6	sex	1	69.2381	170.01	0.0058
Waking activity (cts./min.)	Combined Sexes	6	sel*sex	1	4.04169	9.92	0.0877
Waking activity (cts./min.)	Combined Sexes	6	rep*sex(sel)	2	0.407272	1.88	0.1529
Waking activity (cts./min.)	Female	6	sel	1	0.141878	0.04	0.8688
Waking activity (cts./min.)	Female	6	rep(sel)	2	4.0522	27.27	<.0001
Waking activity (cts./min.)	Male	6	sel	1	10.2488	2.3	0.2686
Waking activity (cts./min.)	Male	6	rep(sel)	2	4.45507	15.6	<.0001
Waking activity (cts./min.)	Combined Sexes	7	sel	1	4.24837	0.62	0.5138
Waking activity (cts./min.)	Combined Sexes	7	rep(sel)	2	6.86115	5.42	0.1557
Waking activity (cts./min.)	Combined Sexes	7	sex	1	56.7022	44.82	0.0216
Waking activity (cts./min.)	Combined Sexes	7	sel*sex	1	1.08044	0.85	0.453
Waking activity (cts./min.)	Combined Sexes	7	rep*sex(sel)	2	1.26509	6.37	0.0018
Waking activity (cts./min.)	Female	7	sel	1	0.511196	0.35	0.6163
Waking activity (cts./min.)	Female	7	rep(sel)	2	1.4806	13.31	<.0001
Waking activity (cts./min.)	Male	7	sel	1	4.91016	0.73	0.4829
Waking activity (cts./min.)	Male	7	rep(sel)	2	6.72507	23.83	<.0001
Waking activity (cts./min.)	Combined Sexes	8	sel	1	13.4389	3.02	0.2244
Waking activity (cts./min.)	Combined Sexes	8	rep(sel)	2	4.45313	3.43	0.2257
Waking activity (cts./min.)	Combined Sexes	8	sex	1	64.8024	49.94	0.0194
Waking activity (cts./min.)	Combined Sexes	8	sel*sex	1	1.49464	1.15	0.3955
Waking activity (cts./min.)	Combined Sexes	8	rep*sex(sel)	2	1.29793	7.13	0.0009
Waking activity (cts./min.)	Female	8	sel	1	2.92881	4.02	0.1827
Waking activity (cts./min.)	Female	8	rep(sel)	2	0.728208	7.54	0.0006
Waking activity (cts./min.)	Male	8	sel	1	12.1822	2.37	0.2635
Waking activity (cts./min.)	Male	8	rep(sel)	2	5.14038	19.45	<.0001
Waking activity (cts./min.)	Combined Sexes	9	sel	1	11.0596	2.1	0.2845
Waking activity (cts./min.)	Combined Sexes	9	rep(sel)	2	5.27314	13.59	0.0685
Waking activity (cts./min.)	Combined Sexes	9	sex	1	43.8922	113.11	0.0087
Waking activity (cts./min.)	Combined Sexes	9	sel*sex	1	3.92762	10.12	0.0862
Waking activity (cts./min.)	Combined Sexes	9	rep*sex(sel)	2	0.388048	2.99	0.0508
Waking activity (cts./min.)	Female	9	sel	1	0.908498	0.42	0.5822
Waking activity (cts./min.)	Female	9	rep(sel)	2	2.14805	23.3	<.0001
Waking activity (cts./min.)	Male	9	sel	1	13.9974	3.99	0.1839
Waking activity (cts./min.)	Male	9	rep(sel)	2	3.50938	20.92	<.0001
Waking activity (cts./min.)	Combined Sexes	10	sel	1	5.92322	0.63	0.5099
Waking activity (cts./min.)	Combined Sexes	10	rep(sel)	2	9.36938	13.39	0.0695
Waking activity (cts./min.)	Combined Sexes	10	sex	1	91.3984	130.62	0.0076
Waking activity (cts./min.)	Combined Sexes	10	sel*sex	1	4.20969	6.02	0.1337
Waking activity (cts./min.)	Combined Sexes	10	rep*sex(sel)	2	0.699753	4.23	0.0149
Waking activity (cts./min.)	Female	10	sel	1	0.0715484	0.03	0.8794
Waking activity (cts./min.)	Female	10	rep(sel)	2	2.42277	28.12	<.0001
Waking activity (cts./min.)	Male	10	sel	1	10.2635	1.32	0.3692
Waking activity (cts./min.)	Male	10	rep(sel)	2	7.76365	32.1	<.0001
Waking activity (cts./min.)	Combined Sexes	11	sel	1	9.76368	1.19	0.3898
Waking activity (cts./min.)	Combined Sexes	11	rep(sel)	2	8.23071	16.12	0.0584
Waking activity (cts./min.)	Combined Sexes	11	sex	1	61.9025	121.23	0.0081
Waking activity (cts./min.)	Combined Sexes	11	sel*sex	1	4.21499	8.25	0.1028
Waking activity (cts./min.)	Combined Sexes	11	rep*sex(sel)	2	0.510629	3.56	0.029
Waking activity (cts./min.)	Female	11	sel	1	0.57029	0.24	0.6699
Waking activity (cts./min.)	Female	11	rep(sel)	2	2.33223	24.99	<.0001
Waking activity (cts./min.)	Male	11	sel	1	13.4973	2.1	0.2843
Waking activity (cts./min.)	Male	11	rep(sel)	2	6.42747	33.27	<.0001
Waking activity (cts./min.)	Combined Sexes	12	sel	1	4.77226	0.49	0.5561
Waking activity (cts./min.)	Combined Sexes	12	rep(sel)	2	9.72718	19	0.05
Waking activity (cts./min.)	Combined Sexes	12	sex	1	78.8835	154.13	0.0064
Waking activity (cts./min.)	Combined Sexes	12	sel*sex	1	5.27713	10.31	0.0848
Waking activity (cts./min.)	Combined Sexes	12	rep*sex(sel)	2	0.511878	2.92	0.0543
Waking activity (cts./min.)	Female	12	sel	1	0.00592899	0	0.9743
Waking activity (cts./min.)	Female	12	rep(sel)	2	4.50417	51.04	<.0001
Waking activity (cts./min.)	Male	12	sel	1	10.8009	1.88	0.3039
Waking activity (cts./min.)	Male	12	rep(sel)	2	5.7457	22.95	<.0001
Waking activity (cts./min.)	Combined Sexes	13	sel	1	5.72423	1	0.422
Waking activity (cts./min.)	Combined Sexes	13	rep(sel)	2	5.7065	5.99	0.1432
Waking activity (cts./min.)	Combined Sexes	13	sex	1	75.346	79.06	0.0124
Waking activity (cts./min.)	Combined Sexes	13	sel*sex	1	6.77183	7.11	0.1166
Waking activity (cts./min.)	Combined Sexes	13	rep*sex(sel)	2	0.953372	4.7	0.0094
Waking activity (cts./min.)	Female	13	sel	1	0.021436	0.01	0.9257
Waking activity (cts./min.)	Female	13	rep(sel)	2	1.93316	15.39	<.0001
Waking activity (cts./min.)	Male	13	sel	1	12.8079	2.67	0.2441
Waking activity (cts./min.)	Male	13	rep(sel)	2	4.80845	17.44	<.0001
