# Supplementary material for: Nonlinear expression patterns and multiple shifts in gene network interactions underlie robust phenotypic change in Drosophila melanogaster selected for night sleep duration
Source: PLoS Comput Biol. 2023 Aug 10;19(8):e1011389. doi: 10.1371/journal.pcbi.1011389 (PMC10443883; doi:10.1371/journal.pcbi.1011389)
Supplement: S8 Table — Columns have the same meaning as those in S6 Table. (XLSX) [file pcbi.1011389.s016.xlsx]

## Sheet: S8 Table
FlyBase ID	Gene Symbol	bIntercept1	bIntercept2	bShort1	bShort2	bLong1	bLong2	gen	bShortGen1	bShortGen2	bLongGen1	bLongGen2	dispersion	flogp	rIntercept1	rIntercept2	rShort1	rShort2	rLong1	rLong2	redgen	redispersion	rlogp	p	padj	muShort	sigmaShort	muControl	sigmaControl	muLong	sigmaLong	muShortGen	sigmaShortGen	muLongGen	sigmaLongGen	ruShort	rigmaShort	ruControl	rigmaControl	ruLong	rigmaLong
FBgn0000045	Act79B	8.07507	8.15121	-0.0312219	0.193993	-0.38175	0.100891	-0.00984678	0.0193743	-0.0241858	0.0276178	-0.0695891	9.58025	-1288.02	8.27123	8.23634	0.171002	0.0264246	-0.356199	-0.30897	-0.0263302	7.79798	-1302.56	7.5363e-06	0.000168437	-0.204116	2.22339	8.15869	0.0707762	-0.311747	0.46442	0.00800753	0.0457229	-0.0276934	0.150872	-0.0723678	0.244974	8.23319	0.12328	-0.312977	0.0532793
FBgn0000394	cv	7.28089	6.97514	-0.131104	0.0124389	0.0533225	-0.0252942	0.0157277	-0.0126113	0.02408	-0.0355617	-0.011519	81.1293	-999.39	7.34696	7.09855	-0.24102	0.144155	-0.153987	-0.127265	0.00598174	57.542	-1030.06	1.51645e-12	4.05976e-10	-0.00155386	0.192647	6.90707	0.431006	-0.0235222	0.136426	0.00144097	0.0448989	-0.0321094	0.0240486	-0.145695	0.14937	7.17421	0.466181	-0.14905	0.044946
FBgn0000808	gd	6.25531	6.18685	-0.0233681	-0.00979293	0.0880624	0.00171878	0.014865	0.000380465	0.0209096	-0.00650907	0.0133035	94.2868	-873.424	6.22573	6.1728	-0.0367961	0.104317	0.0191392	0.069367	0.018046	81.082	-887.076	1.72586e-05	0.000308247	-0.0221646	0.0233396	6.1726	0.511018	0.175204	0.259548	0.0356779	0.0365571	-0.00287192	0.0222376	-0.0267671	0.12889	6.18666	0.0581455	0.00539325	0.0948209
FBgn0002183	dre4	9.75773	9.78563	0.0131656	-0.0548972	-0.0412293	0.00633695	0.00867869	-0.0130967	-0.0030983	0.00794059	0.00812982	206.194	-1340.48	9.76158	9.77086	-0.0919106	-0.0735702	0.0119508	0.0632287	0.00866144	140.505	-1354.34	1.42658e-05	0.000269575	0.0604103	0.132563	9.77569	0.0230584	-0.011637	0.0489877	0.00577612	0.0186697	-0.0882958	0.493238	-0.0388214	0.0529895	9.76784	0.0207615	0.0516815	0.0686962
FBgn0002622	RpS3	11.3678	11.2662	-0.137325	0.0229707	-0.256568	-0.0483097	-0.0196692	0.0133546	-0.00305536	0.026175	0.00195983	116.481	-1589.08	11.3475	11.2283	-0.0579476	0.000364029	-0.103788	-0.00731932	-0.014523	95.5518	-1603.07	1.26472e-05	0.000244658	-0.294234	0.259758	11.3245	0.067939	-0.444003	0.502653	0.00957338	0.023515	-0.121275	0.139235	-0.0732059	0.261483	11.2823	0.150114	-0.0650737	0.0857117
FBgn0002772	Mlc1	8.22212	8.39393	-0.0879505	0.0912601	-0.455596	0.108144	-0.00300812	0.0285849	-0.0234877	0.041471	-0.04942	15.9949	-1287.79	8.28156	8.3602	0.272378	0.0568181	-0.184929	-0.158586	-0.00585057	12.4109	-1302.99	4.0361e-06	0.000105933	-0.068788	0.215666	7.98808	0.408641	-0.121755	0.602301	0.0789562	0.222184	-0.05035	0.102179	0.0948009	0.0380584	8.23624	0.353542	-0.155459	0.123168
FBgn0002887	mus201	7.90584	7.90169	0.0656909	-0.100259	0.145225	-0.00303749	0.0116094	-0.019201	0.0191891	-0.000488943	-0.000369788	158.341	-1083.62	7.92976	7.90076	-0.0693203	0.0352232	0.100319	0.0291553	0.0121356	111.757	-1102.51	1.24375e-07	6.62154e-06	-0.15808	0.404095	7.89857	0.0185042	0.188309	0.37023	-0.00328271	0.081002	0.131221	0.770357	-0.0239998	0.0911119	7.86918	0.117091	0.0529002	0.0369092
FBgn0002922	nau	3.99177	4.01013	-0.046564	0.2283	-0.0916328	0.103724	-0.00220527	0.0219161	-0.0315455	0.0147522	-0.0402631	22.3982	-632.945	4.06932	4.08103	0.178745	-0.0663572	-0.0600368	-0.10286	-0.0110535	21.2378	-647.961	4.82372e-06	0.000119572	-0.0859395	0.286397	4.01568	0.0283076	0.152858	0.333625	-0.0185329	0.0615458	0.00710858	0.0832441	-0.0167124	0.0754413	4.0825	0.0142671	-0.0703879	0.0364389
FBgn0002937	ninaB	5.41333	5.41515	0.0387526	0.133862	-0.471936	0.140389	-0.0324805	-0.000363342	-0.0577407	0.0382224	-0.0465913	14.2317	-818.463	5.55481	5.53568	-0.049137	-0.195255	-0.0991411	-0.129333	-0.0540296	12.1799	-830.589	7.11071e-05	0.000854197	-0.0197833	0.160837	5.42302	0.0849483	-0.385422	1.05702	0.0541944	0.178337	-0.0415908	0.0776557	-0.0587459	0.24867	5.5722	0.0292564	-0.110468	0.0892182
FBgn0002962	nos	9.73606	9.77855	0.0553848	-0.188607	0.345903	-0.194168	-0.000348197	-0.0184954	0.0452562	-0.0257427	0.0446928	16.9652	-1516.07	9.60491	9.65019	-0.0292004	0.120382	0.155322	0.124922	0.0124066	15.799	-1532.36	1.44706e-06	4.69168e-05	-0.0511769	0.817143	9.76527	0.0385237	0.0583295	0.249772	0.0713827	0.0564952	-0.102172	0.0920904	0.136641	0.19089	9.6158	0.0859719	0.164818	0.0912598
FBgn0003076	Pgm	9.44949	9.4252	-0.0832118	0.122475	-0.135409	0.0322481	-0.0225529	0.0327223	-0.0215414	-0.00367019	-0.0267468	32.2067	-1397.22	9.46356	9.34129	0.188371	0.0268277	-0.214129	-0.106157	-0.0183744	22.7345	-1411.45	1.00797e-05	0.000206604	-0.600678	0.879803	9.41924	0.0873119	-0.0019815	0.187164	0.0665018	0.127648	-0.00742311	0.0269068	0.0431567	0.0429119	9.53521	0.328874	-0.166505	0.0467313
FBgn0003149	Prm	8.58962	8.70467	-0.212413	0.0661303	-0.392354	0.0899388	-0.0171514	0.0418584	-0.00826383	0.0270209	-0.0421382	13.6991	-1329.76	8.60073	8.66072	-0.0729625	-0.026754	-0.331957	-0.256366	-0.00946989	13.3592	-1342.74	3.21372e-05	0.000489635	0.00765466	0.188872	8.57709	0.277068	-0.257728	0.251041	0.0364067	0.0826362	-0.158196	0.657318	-0.00213861	0.0628685	8.63241	0.0552151	-0.259247	0.0484401
FBgn0003250	Rh4	8.17961	8.00164	0.0336717	0.171106	-0.213844	0.0998033	-0.0151192	-0.00522472	-0.0237534	0.0227054	-0.0376617	21.2334	-1223.92	8.38606	8.13882	-0.08414	-0.0478362	-0.124548	-0.145667	-0.0311291	16.1591	-1239.41	3.09517e-06	8.5049e-05	0.0873173	0.113223	8.22382	0.44301	-0.00962683	0.22491	-0.0106081	0.0582975	0.11514	0.301584	-0.0493365	0.0132662	8.16932	0.327247	-0.16833	0.0823093
FBgn0003292	rt	7.70188	7.68722	-0.00507333	-0.00761249	0.316626	-0.108447	0.0167853	-0.0111916	0.0158953	-0.0315384	0.0194742	42.7168	-1154.39	7.65011	7.62842	0.0355638	0.109702	0.0877448	0.0890324	0.0208688	32.72	-1168.61	1.01276e-05	0.000206744	-0.0172554	0.0242703	7.68553	0.014472	0.129804	0.306155	0.00650684	0.0366735	-0.0319521	0.0296872	-0.279962	0.35865	7.65608	0.134004	0.0985101	0.0264218
FBgn0003401	shu	8.01093	8.00531	-0.0112135	-0.0602602	0.0856018	-0.0872089	0.00677104	-0.00514555	0.0184546	0.00182662	0.0270761	137.707	-1111.88	7.9642	7.96617	-0.00794567	0.0180979	0.0902319	0.0678085	0.0155145	123.763	-1125.57	1.66343e-05	0.000300314	-0.0306347	0.0382949	8.00421	0.0275936	-0.0736104	0.124306	-0.00727368	0.0185303	0.0659712	0.0790236	-0.0910847	0.0980362	7.97865	0.0254925	0.0951112	0.031118
FBgn0003598	Su(var)3-7	9.59671	9.65603	0.0648348	-0.0729277	0.20887	-0.0358133	0.0104566	-0.00865506	0.0115581	-0.0101566	0.0150685	124.258	-1372.41	9.59342	9.66227	-0.0265749	0.000311488	0.13722	0.0643447	0.00988494	86.6621	-1385.75	2.30807e-05	0.000384816	0.0166847	0.213129	9.61217	0.103104	0.263302	0.558867	-0.0474444	0.124772	0.00342445	0.0102333	-0.00592354	0.0496448	9.62702	0.0527198	0.262822	0.371286
FBgn0003890	betaTub97EF	7.54297	7.516	-0.0265461	0.178516	-0.337146	0.185477	-0.0216648	0.0119087	-0.0513475	0.0138339	-0.0548002	17.0273	-1132.88	7.56539	7.54004	-0.0167696	0.025706	-0.192853	-0.121364	-0.0333655	13.9214	-1148.96	1.77374e-06	5.46709e-05	0.0865388	0.0933031	7.56397	0.0533964	0.17366	0.738694	0.0608171	0.0870049	-0.0389064	0.0338656	0.0399825	0.0288838	7.53046	0.176864	-0.198817	0.0448226
FBgn0003969	vap	8.22114	8.21462	-0.038956	-0.0737656	0.173163	-0.103813	-0.00885424	0.00111985	0.0205078	-0.0189349	0.0194942	62.794	-1175.99	8.15343	8.21268	-0.0298824	0.0656687	0.0851271	-0.0299695	-0.00418408	61.0294	-1188.66	4.30798e-05	0.000607919	-0.0366807	0.0669713	8.22248	0.0184747	-0.194412	0.391826	0.309073	0.352012	-0.00530098	0.20082	0.0701226	0.00627593	8.15877	0.0841152	-0.0763995	0.252726
FBgn0004117	Tm2	8.54765	8.61149	-0.2366	-0.0131597	-0.404045	0.106802	-0.0153225	0.0302734	-0.0194213	0.037018	-0.0419967	15.2093	-1317.41	8.59541	8.65451	0.0432316	-0.150213	-0.178825	-0.20701	-0.0171447	11.4594	-1331.45	1.19811e-05	0.000234923	-0.053037	0.331283	8.57625	0.0978702	-0.179538	0.748976	0.00985515	0.234386	-0.0295942	0.0697991	-0.144831	0.109032	8.64677	0.0571118	-0.216001	0.0413913
FBgn0004133	blow	6.02255	5.90575	-0.288745	0.0821627	-0.56465	0.203094	0.0121199	0.0196186	-0.0372503	0.0448113	-0.0358064	15.0234	-932.236	6.0518	5.92936	-0.227259	-0.150437	-0.259479	0.0758355	0.00499646	13.9894	-945.346	2.85836e-05	0.000450096	-0.3407	0.624874	5.94007	0.0891931	-0.549456	1.40503	-0.075019	0.0874963	0.00928615	0.143248	-0.162182	0.0292441	6.04806	0.275423	-0.188775	0.35897
FBgn0004169	up	8.88545	8.97463	-0.101301	0.13421	-0.279752	0.0888839	-0.000250991	0.0287415	-0.0235098	0.0162814	-0.058294	14.68	-1393.37	8.97482	9.02118	-0.0148008	-0.0258435	-0.146786	-0.146428	-0.0114471	11.548	-1405.91	4.87671e-05	0.000654653	-0.0446733	0.386388	8.88526	0.10187	-0.233163	0.862055	-0.0935354	0.098553	0.0109371	0.143289	-0.068686	0.153055	8.98583	0.0894411	-0.107782	0.0380695
FBgn0004619	GluRIA	4.35291	4.53322	-0.190507	-0.166117	-0.263353	0.232615	-0.0186544	0.0149645	-0.00554518	0.0274348	-0.0700844	22.7249	-652.831	4.46826	4.57856	-0.271896	-0.123787	-0.188553	-0.199709	-0.0281873	20.8568	-665.866	3.0629e-05	0.000471255	-0.181103	0.0216026	4.26451	0.200662	0.253507	0.399623	0.0111904	0.0269849	-0.0710243	0.30707	-0.167013	0.0730646	4.48599	0.113096	-0.230849	0.103917
FBgn0004872	piwi	9.22596	9.405	0.0643474	-0.0946846	0.392377	-0.117935	0.00488144	-0.0221215	-0.00536614	-0.0230991	0.0350668	81.6619	-1345.22	9.2382	9.41429	-0.125631	-0.115328	0.227391	0.112931	0.00474307	54.5814	-1371.06	1.60577e-10	2.38826e-08	0.0161209	0.303861	9.17757	0.137621	0.440172	0.737356	-0.00118706	0.0361809	0.038827	0.0713782	-0.0792214	0.0506317	9.231	0.167984	0.167665	0.201134
FBgn0005564	Shal	5.71399	5.61146	-0.0796492	0.158287	-0.113138	0.278096	0.0154562	0.00652535	-0.0345214	-0.00491266	-0.0499599	34.5598	-847.957	5.83844	5.71717	-0.0596391	-0.0464781	-0.140002	-0.048367	0.000265268	28.2248	-860.371	5.44923e-05	0.000708726	0.0832854	0.203006	5.58062	0.187598	0.325769	0.533999	0.255165	0.532324	-0.0102683	0.0260951	-0.0349722	0.0998609	5.78359	0.279005	0.18984	0.445198
FBgn0005592		4.31544	4.61028	0.0536389	0.191369	-0.180793	0.188583	-0.0161242	0.0461012	-0.0388739	0.0297547	-0.031814	11.7334	-706.03	4.41959	4.62294	0.269149	-0.0446104	-0.0917435	-0.131037	-0.0167202	12.8249	-719.091	2.99088e-05	0.000463982	0.119594	0.148819	4.42508	0.263982	0.0914161	0.354648	-0.0232517	0.0694111	0.00288222	0.200028	-0.0573094	0.385784	4.58929	0.267619	-0.11164	0.0344525
FBgn0005670	Cyp4d1	6.14985	6.19152	-0.0433695	-0.0872019	-0.383932	-0.0368719	-0.0165527	0.0720228	-0.0438983	0.000595955	-0.13228	5.23651	-1002.2	6.34723	6.37755	0.382462	-0.321884	-0.474795	-0.757637	-0.0386253	3.42657	-1022.51	3.21188e-08	2.16513e-06	-0.0575322	0.0718966	6.09224	0.123974	-0.474747	0.722473	0.00281362	0.195223	-0.0581528	0.102253	-0.611493	1.29616	6.39417	0.0816776	-0.363449	0.345708
FBgn0010909	msn	9.17825	9.136	0.0371673	0.0326587	0.164599	0.00265245	0.026434	-0.0106152	0.0100811	-0.0197584	-0.00251184	124.17	-1297.19	9.22805	9.19137	-0.0220252	0.0840877	-0.000167631	-0.0181633	0.0207878	120.001	-1309.79	4.56395e-05	0.000627961	0.0587032	0.0270431	9.15942	0.0844272	0.272555	0.406027	-0.00236146	0.0179973	0.00854542	0.0450699	0.0224692	0.065745	9.21839	0.0329457	-0.022648	0.039741
FBgn0011554	etaTry	5.79733	5.82488	-0.111814	0.000804103	-0.441312	0.0502251	-0.0425319	0.0303102	-0.0460295	0.0459851	-0.0298145	8.04828	-890.061	5.89046	5.87716	0.215076	-0.28849	-0.192389	-0.178571	-0.0486611	7.98797	-903.437	2.23138e-05	0.000374463	-0.0891301	0.264087	5.78692	0.0245048	-0.109676	0.5347	0.0397786	0.148696	-0.0330767	0.0869546	-0.0214347	0.588074	5.88131	0.0470211	-0.236482	0.238755
FBgn0011603	ine	6.84148	6.85671	-0.0812921	0.183216	-0.0599973	0.226901	0.0115942	0.0281133	-0.0272183	0.0138528	-0.0521525	19.9316	-1072.14	6.90519	6.8961	-0.0558797	-0.0607812	-0.117384	-0.117181	0.00416829	12.8663	-1088.15	1.90522e-06	5.74017e-05	-0.227933	0.342944	6.85182	0.0544211	0.331723	0.599298	0.00496943	0.0368307	-0.0398029	0.0464569	-0.0102228	0.232942	6.91428	0.0286276	-0.116249	0.0076651
FBgn0011742	Arp2	9.21653	9.20036	0.0588425	0.0211176	0.113385	-0.0259292	0.00127198	-0.0133422	-0.000516668	-0.0144088	0.00624238	232.784	-1241.52	9.2297	9.22135	-0.0518094	0.0426181	0.0217609	0.0201193	-0.00313573	176.065	-1256.27	6.19816e-06	0.000144053	0.0533368	0.0918198	9.16014	0.253645	-0.403551	1.42304	-0.0073676	0.0135703	0.000203082	0.0480519	0.0678941	0.102654	9.22647	0.0128393	-0.000557004	0.0381477
FBgn0011828	Pxn	7.01096	7.04282	-0.318324	0.249644	-0.582591	0.16378	-0.0216114	0.0579521	-0.0360549	0.0686783	-0.0456809	9.64192	-1111.07	6.96082	6.95421	0.135323	0.0449981	-0.138761	-0.0852437	-0.0145154	7.85101	-1124.72	1.73799e-05	0.000308872	-0.407679	0.491735	7.02603	0.0777418	-0.716023	1.05966	-0.0149271	0.19498	0.0564505	0.0624049	-0.052437	0.264806	7.0073	0.0660398	-0.106469	0.0293262
FBgn0011834	Ser6	6.69445	7.73712	0.0766393	-0.200342	-0.0868881	-0.153905	-0.192553	0.225695	0.0504953	0.187678	-0.049084	1.79338	-1126.15	6.3124	7.12559	1.4154	0.0151523	1.21196	-0.635536	-0.106074	1.44373	-1142	2.20762e-06	6.44404e-05	0.232581	0.69908	7.55538	0.762761	-0.101038	0.182013	0.104921	0.0899168	-0.111578	0.717034	0.461222	1.72503	6.28943	1.03317	0.0182131	1.06007
FBgn0013308	Odc2	4.68029	4.57495	0.0739204	0.0729157	0.0664949	0.0542031	-0.0309968	-0.0056558	-0.024734	-0.0145927	-0.115957	13.851	-702.692	4.80937	4.56666	0.140928	0.0500262	-0.169811	-0.568831	-0.0427163	10.6797	-717.025	9.13185e-06	0.000194026	0.19135	0.129526	4.71812	0.294913	0.0686864	0.0220003	-0.0671407	0.15615	0.056531	0.195232	0.0449941	0.0658368	4.79839	0.167412	-0.20815	0.215454
FBgn0013771	Cyp6a9	6.3628	7.04681	0.270351	0.108056	0.22111	0.158831	-0.0135251	0.0341562	-0.00655534	-0.0452522	0.00196315	22.2412	-1029.03	6.46037	7.13794	0.418075	0.00606481	-0.0792119	0.121669	-0.0207146	17.0106	-1044.22	4.10088e-06	0.000107034	0.289353	0.312757	6.47039	0.558839	0.126828	0.0742898	-0.050964	0.144527	0.0222244	0.0663217	0.283135	0.393349	6.57136	0.543704	0.0328913	0.111912
FBgn0013949	Elal	7.09079	7.05641	-0.295316	-0.176759	-0.623213	-0.122713	-0.0507298	0.0869387	-0.00542156	0.0732946	-0.0155946	11.9463	-1063.04	6.85226	6.84072	0.210963	-0.273429	-0.17352	-0.245378	-0.0179689	8.90037	-1083.04	4.32055e-08	2.73537e-06	-0.214508	0.0988495	7.06905	0.029551	-0.407056	0.239285	-0.711754	1.04124	0.0719108	0.111901	-0.272588	0.869488	6.84163	0.0143642	-0.0750836	0.199481
FBgn0014073	Tie	6.48016	6.62672	0.114584	0.226194	-0.145841	-0.122213	-0.00901793	0.0967759	0.101957	-0.00269827	-0.0423984	10.0616	-1076.81	6.35848	6.42947	0.665159	0.968064	-0.236605	-0.256085	0.0143181	8.1115	-1094.88	2.727e-07	1.30367e-05	0.0909132	0.119751	6.54708	0.2183	-0.131996	0.0300625	0.0954984	0.0177537	-0.333719	1.19926	0.827932	0.175841	6.30048	0.410815	-0.31128	0.0758471
FBgn0014417	CG13397	8.55779	8.77795	0.185077	-0.42109	0.162388	-0.307259	-0.042328	0.0057	0.0274889	-0.0166639	0.0401733	39.6904	-1239.75	8.51934	8.62334	0.22872	-0.169526	0.0487334	0.0326188	-0.0332156	31.9963	-1258.25	1.80008e-07	9.11717e-06	0.0138327	0.487576	8.93797	0.719557	-0.562455	0.95353	0.00537206	0.0293703	-0.0526217	0.293991	-0.107202	0.229637	8.51642	0.231233	0.0263143	0.0391388
FBgn0015011	AhcyL2	6.30998	6.28795	-0.130161	0.190097	-0.436419	0.309856	-0.0447246	0.0168607	-0.036117	0.0308543	-0.0576018	18.871	-911.51	6.37659	6.38607	-0.00586386	-0.0747754	-0.154886	-0.134159	-0.0569195	19.3511	-923.828	5.95432e-05	0.000759075	-0.0498577	0.725018	6.31031	0.0292999	-0.263524	0.635924	-0.0111338	0.12428	0.374237	0.407088	-0.0205921	0.0691495	6.39025	0.0478474	-0.220417	0.106229
FBgn0015039	Cyp9b2	7.73742	8.26361	-0.411095	-0.408376	-0.58946	0.156417	0.0360641	-0.0038724	-0.0633611	0.084475	-0.0305076	8.8842	-1297.39	7.71198	8.22586	-0.705079	-0.685467	-0.017301	-0.00903566	0.0396055	7.63939	-1315.67	2.21827e-07	1.09974e-05	-0.309926	0.28429	8.05259	0.31042	-0.428847	0.880378	-0.0423136	0.0317824	0.355922	1.19559	-0.536272	0.282435	8.17984	0.876589	0.00214873	0.0487773
FBgn0015040	Cyp9c1	6.24349	6.32137	-0.308332	-0.111331	-0.138727	-0.128843	0.00146075	0.0552221	-0.0194391	0.0474862	0.011483	23.2208	-960.959	6.17773	6.20798	0.130117	-0.187926	0.097007	0.0777446	0.0133122	17.7784	-981.477	2.6409e-08	1.83298e-06	-0.566892	0.597785	6.27863	0.0345577	-0.187336	0.106672	-0.767318	0.963949	0.0374242	0.01818	-0.103785	0.11411	6.20084	0.0493777	0.0594029	0.175135
FBgn0015336	CG15865	4.59337	4.54612	-0.0975236	0.110088	-0.335093	0.106614	0.00338106	0.0860976	-0.0433376	0.0400171	-0.0327019	14.7778	-747.604	4.59505	4.53981	0.358799	-0.165281	0.0446606	-0.163213	0.00706875	9.10089	-770.236	3.50241e-09	3.52878e-07	-0.0362853	0.118972	4.62669	0.0643148	-0.23778	0.447701	0.0537461	0.104528	-0.0583449	0.201777	0.17902	0.521176	4.60236	0.0667268	-0.060938	0.0970972
FBgn0015541		6.99937	6.93296	-0.11907	0.186699	-0.163448	0.167897	0.0126966	0.00656741	-0.0401633	0.00305006	-0.0578381	25.9806	-1055.9	7.08463	6.99824	0.0122329	-0.00553514	-0.119121	-0.117886	-0.00814399	20.5026	-1070.86	5.0842e-06	0.000124709	0.100408	0.258714	6.97811	0.518253	-0.055393	0.155818	-0.0560754	0.143651	0.00466823	0.099972	-0.0201771	0.0328869	7.00275	0.0928072	-0.0994235	0.0868542
FBgn0015663	Dot	5.77876	5.71054	-0.128929	0.0457296	-0.231545	-0.0517052	-0.0201184	0.0423251	-0.0100666	0.0120246	-0.0206476	44.4382	-817.99	5.71298	5.63922	0.179188	0.0279723	-0.106874	-0.104162	-0.0148127	33.911	-830.494	5.01283e-05	0.000669092	0.0143257	0.146835	5.66836	0.225856	-0.158916	0.0815965	0.0381696	0.0722979	-0.0228519	0.0336248	0.157351	0.118098	5.71552	0.301983	-0.115483	0.059823
FBgn0015766	Msr-110	9.29512	9.24587	0.079776	0.228782	-0.170379	0.17175	0.00951536	-0.000378435	-0.0487895	-0.00796056	-0.0430324	13.9093	-1454.91	9.4221	9.40018	-0.0608476	-0.144122	-0.280599	-0.216947	0.000613337	15.1709	-1467.12	6.5485e-05	0.000802084	0.063064	0.224864	9.23405	0.0787445	-0.0209276	0.301964	-0.0135019	0.31845	0.0186781	0.102621	-0.111756	0.0442009	9.41168	0.019089	-0.234957	0.0560689
FBgn0016031	lama	8.75729	8.83768	-0.00187236	0.0583138	0.0380658	0.0141383	-0.00497145	0.0110668	0.0134023	-0.0167997	0.00348117	230.863	-1183.34	8.75802	8.84764	0.0777427	0.154522	-0.0922976	0.00560299	-0.00334559	150.309	-1202.93	6.38176e-08	3.75139e-06	0.211331	0.199502	8.77611	0.0504499	-0.00610198	0.0668143	0.0141298	0.020387	-0.0200634	0.0174834	0.122647	0.04208	8.78412	0.0715914	-0.0362139	0.0442721
FBgn0016123	Alp4	8.94707	9.06846	-0.02	-0.0614497	-0.195571	0.229112	-0.0447985	0.0252895	-0.0163778	0.0137088	-0.0764348	13.5326	-1357.8	9.08019	9.09102	0.0299895	-0.120957	-0.248462	-0.253226	-0.0512518	14.3533	-1371.62	1.48469e-05	0.000279349	-0.0720033	0.0439919	8.98563	0.105294	-0.0894178	0.459065	0.00594142	0.0337032	-0.444672	0.58347	-0.202061	0.364947	9.06623	0.0470695	-0.251356	0.0222251
FBgn0020306	dom	10.1311	10.1353	0.0706971	-0.00317318	0.15518	-0.0184646	0.0110285	-0.00834973	0.00498652	-0.00539501	0.0112491	159.258	-1420.75	10.1108	10.1154	-0.0365162	0.0237172	0.125614	0.0657773	0.0144527	143.568	-1433.03	6.1858e-05	0.000776956	0.04733	0.0468333	10.115	0.0318781	0.100512	0.238608	-0.00287078	0.053452	0.0453522	0.082986	0.0020071	0.0637801	10.1103	0.00947619	-0.217538	0.51215
FBgn0020497	emb	9.58582	9.61244	0.0935966	-0.0385815	0.123301	-0.0251582	0.0123869	-0.0135207	0.00711646	-0.00994922	0.0108785	210.888	-1325.32	9.59103	9.60896	0.00267142	0.0214462	0.069533	0.0578843	0.0112312	169.936	-1338.64	2.351e-05	0.00038993	0.0143598	0.153513	9.58491	0.0188577	-0.0297488	0.155846	0.0183046	0.0513554	-0.278705	1.00254	-0.0203387	0.0480484	9.58465	0.0752216	0.061578	0.0724485
FBgn0022702	Cht2	8.01678	7.9505	0.144649	0.036643	0.00259481	-0.225695	-0.0215202	-0.0156146	-0.00382311	0.00951226	0.0422548	65.3569	-1128.42	7.95873	7.92603	0.0363818	0.0164259	0.1106	0.0741518	-0.0165596	43.0182	-1144.18	2.39803e-06	6.86554e-05	-0.0691766	0.239096	7.9122	0.191406	0.11018	0.579803	-0.00783564	0.00782724	0.0263756	0.0281099	0.0372704	0.028778	7.88382	0.160306	0.0822337	0.0334491
FBgn0022800	Cad96Ca	5.00848	4.9445	-0.0251674	0.149926	-0.110847	0.155898	-0.0124108	-0.00467266	-0.037811	0.0123396	-0.0295919	29.7321	-734.728	5.14094	5.00918	-0.0683361	-0.0428426	-0.0288387	-0.0324218	-0.0236791	23.8783	-747.605	3.54771e-05	0.000532386	0.11098	0.109966	5.28532	0.315709	0.121701	0.153916	0.00456087	0.032004	-0.00605561	0.0366264	-0.0881862	0.10391	5.10963	0.559236	-0.0397114	0.0352262
FBgn0023507	D2hgdh	8.75595	8.74779	-0.0612476	0.261234	-0.012	0.225368	0.0193822	0.0448101	-0.0439984	-0.0171265	-0.0963777	23.5391	-1357.02	8.91484	8.89355	0.330663	-0.0215789	-0.113752	-0.37821	-0.00367885	16.6005	-1391.86	2.64233e-14	1.23793e-11	0.0201217	0.372175	8.74921	0.0108283	0.448703	0.388866	0.0605014	0.242712	-0.063024	0.0310497	0.188213	0.233947	8.90075	0.0157755	-0.470367	0.455934
FBgn0024150	Ac78C	5.17977	5.10971	0.0509668	0.224082	-0.112859	0.187978	-0.00568644	0.0245344	-0.0161976	0.00315188	-0.0438559	40.6679	-745.037	5.29561	5.1874	0.164459	0.115213	-0.132918	-0.11262	-0.0162247	42.9051	-761.564	1.16393e-06	4.06335e-05	0.406272	0.678976	5.17667	0.227705	0.0249705	0.192423	0.00966712	0.0317791	-0.0121246	0.0290714	0.149065	0.0405598	5.25639	0.139605	-0.106394	0.0350856
FBgn0024222	IKKbeta	7.66161	7.67447	0.0619546	-0.0378232	0.32775	0.0458543	0.0174261	-0.00774766	0.0166109	-0.0257531	0.0047124	88.5719	-1101.54	7.65705	7.69119	0.0284181	0.087389	0.156274	0.0441693	0.016177	68.6187	-1114.36	3.74189e-05	0.000549554	-0.494161	0.883919	7.69262	0.0246356	0.245795	0.376364	-0.00858611	0.0437688	0.0039536	0.030037	0.0568525	0.0311186	7.64328	0.0595012	0.0670581	0.100088
FBgn0024230	Hs2st	8.04241	8.0091	0.197494	0.0520647	0.0569669	0.00582239	0.0108823	-0.011776	0.0199497	-0.0148445	-0.00690603	105.801	-1131.47	8.04958	8.01549	0.098728	0.211985	-0.0421311	-0.0594873	0.0090327	84.4138	-1147.99	1.17163e-06	4.06599e-05	0.233635	0.263406	8.10974	0.147971	0.310123	0.362345	0.0146104	0.032465	-0.0303629	0.0807956	0.110344	0.106935	7.99572	0.289384	-0.0635579	0.0305866
FBgn0024361	Tsp2A	6.56773	6.53466	0.0362255	0.462681	-0.182012	0.0743412	-0.0157402	0.0196376	-0.0695451	0.0217214	-0.0221858	15.4828	-1010.67	6.61808	6.58372	0.159403	0.00535174	-0.11206	-0.126575	-0.0219289	13.6504	-1024.84	1.063e-05	0.000213728	0.33961	0.850208	6.54856	0.0539859	-0.0332285	0.130597	-0.00567941	0.0990869	0.0506344	0.0509238	0.137743	0.100468	6.61588	0.0459288	-0.127588	0.028128
FBgn0024984	CG3457	7.63529	7.73403	-0.0101489	-0.0360361	0.220287	-0.450095	0.00989323	-0.00798592	0.00708995	-0.0137113	0.0458657	74.0661	-1097.69	7.63525	7.69005	0.000511759	0.0308948	0.125694	-0.0412017	0.0115926	47.7472	-1122.94	2.8548e-10	3.87673e-08	-0.00663653	0.0292345	7.70366	0.0833007	-0.149161	0.302133	-0.00459821	0.0354771	0.0370142	0.0455986	-0.261235	0.337307	7.63901	0.0447565	0.070109	0.101928
FBgn0024991	CG2694	8.88412	8.97699	0.0315336	-0.106172	0.214818	-0.0843363	0.00670212	-0.00141967	0.0141027	-0.00599897	0.0225414	109.178	-1264.82	8.87434	8.95124	-0.0388723	-0.0249856	0.1213	0.0671866	0.0132329	92.2647	-1278.01	2.64716e-05	0.000425959	0.0134699	0.0996406	8.90394	0.0976264	0.448139	0.690254	-0.0583785	0.159865	0.0223606	0.0261451	-0.0311881	0.0458188	8.91341	0.0477277	0.0883318	0.0975429
FBgn0024995	CG2680	6.76886	6.76802	0.119641	0.199439	-0.436471	0.140243	-0.0475147	0.0099417	-0.0175083	0.0494419	-0.0743912	14.2756	-1018.21	6.92492	6.88602	0.161362	-0.00117877	-0.251246	-0.31906	-0.054602	9.33444	-1035.14	7.96757e-07	3.01033e-05	0.198924	0.175311	6.76319	0.0572373	0.0511822	1.1039	0.0136549	0.0393588	-0.304155	0.541406	0.0355482	0.133319	6.92309	0.0885473	-0.256381	0.0507187
FBgn0025628	CG4199	8.54956	8.78854	-0.171826	-0.188614	-0.0789564	-0.0765524	-0.020625	0.0198608	0.0175938	0.00809523	-0.0455916	41.453	-1241.39	8.54784	8.7291	-0.00544195	-0.0495676	-0.0791376	-0.288237	-0.0184377	39.7534	-1258.14	9.48165e-07	3.51158e-05	-0.236404	0.0793931	8.68536	0.152141	-0.0957729	0.0431753	-0.0066492	0.0969691	0.00471144	0.0239733	-0.0383415	0.041877	8.93813	0.53118	-0.237531	0.164044
FBgn0026147	CG16833	8.93255	8.98391	-0.0168845	-0.0514903	0.121115	-0.107944	0.00876517	0.00232889	0.00651653	-0.00708687	0.0245681	214.923	-1218.97	8.8909	8.92307	0.0102696	0.0104034	0.100363	0.087862	0.0134955	153.226	-1233.19	1.00987e-05	0.000206604	-0.0228361	0.0406305	8.94893	0.0398677	0.0208147	0.216219	-0.00719524	0.0176724	0.264274	0.28098	-0.000215	0.0129004	8.92158	0.193695	0.104045	0.0928162
FBgn0026376	Rgl	7.79856	7.71805	0.0455764	0.0496346	0.33571	-0.00877365	0.0252646	-0.00182303	0.00689027	-0.0438628	-0.00883752	80.5114	-1133.4	7.84752	7.79915	-0.00512099	0.121516	0.0823558	-0.097317	0.0150023	64.7777	-1150.35	7.80887e-07	2.97436e-05	0.051001	0.0345061	8.17597	2.55204	0.195605	0.35212	0.00578257	0.0127837	-0.0388561	0.0447515	0.0596458	0.0727348	7.85464	0.100851	0.166906	0.246962
FBgn0026751	XRCC1	8.04515	8.05785	-0.0789678	-0.0889309	0.0474105	-0.131416	0.000391349	0.00795952	0.0140144	-0.000178425	0.0236791	142.677	-1092.65	7.97674	8.02597	-0.00732188	-0.00420113	0.0772425	-0.0123421	0.0089451	132.839	-1107.58	5.22004e-06	0.000126714	-0.0816692	0.0145141	8.04234	0.0300077	-0.0276102	0.0529806	-0.00619431	0.0622509	0.0471677	0.10243	-0.00170882	0.00289608	7.9772	0.0175811	0.0306834	0.126914
FBgn0027503	CG11970	8.18588	8.24584	0.0446635	-0.0862182	0.264625	-0.129083	0.00964923	-0.00291077	0.0121864	-0.0162813	0.0206974	91.9747	-1162.63	8.18266	8.24916	-0.0470439	0.00649519	0.146765	0.00911522	0.0103546	80.4247	-1175.5	3.56055e-05	0.000532386	0.0126283	0.101023	8.23795	0.0672284	0.0891234	0.25122	-0.0671847	0.604364	0.0128167	0.0348762	-0.0225465	0.0558703	8.2396	0.0727628	0.0669524	0.0721292
FBgn0027538	beta4GalNAcTA	7.45512	7.4535	0.013023	-0.044279	0.282592	-0.117985	0.00493043	-0.0062687	0.00650036	-0.0178752	0.0247803	97.8561	-1032.64	7.40953	7.43761	-0.0446425	-0.00560411	0.134579	0.0405468	0.00943711	98.7084	-1045.5	3.59614e-05	0.000534854	-0.00979447	0.218983	7.45659	0.0495592	0.183933	0.352888	-0.100362	0.231012	0.0503082	0.0566516	-0.0124192	0.0568228	7.43642	0.0512518	0.144032	0.144286
FBgn0027560	Tps1	9.96212	9.96965	-0.343095	0.138515	-0.243546	-0.0402745	-0.0189112	0.069627	-0.0363071	0.019808	-0.0249185	16.0804	-1533.89	9.98512	9.93205	0.291078	-0.0590129	-0.203287	-0.193932	-0.0146729	13.1744	-1551	6.69838e-07	2.70534e-05	0.0677773	0.578906	9.70034	0.256231	-0.125205	0.122398	-0.0364466	0.10747	0.0329233	0.0568023	0.268733	0.246522	9.97487	0.0460124	-0.198118	0.0344004
FBgn0027611	LManII	8.55282	8.68546	-0.146073	0.18269	-0.221346	-0.0323091	-0.00156259	0.0439964	-0.0559384	0.0177281	0.0187293	28.5711	-1308.14	8.51446	8.6677	0.164615	-0.219613	-0.0428541	0.091588	0.00123591	21.8331	-1327.97	5.09758e-08	3.14239e-06	-0.107782	0.658408	8.55546	0.0765641	-0.309088	0.310295	-0.138952	0.237284	0.0379723	0.0561686	-0.446664	1.89606	8.57909	0.108112	-0.0589329	0.163538
FBgn0027844	CAH1	7.83807	7.81977	-0.0987834	0.0700541	-0.311118	0.126063	-0.024755	0.0128549	-0.0254038	0.0126232	-0.0440358	17.8289	-1174.98	7.90496	7.92701	-0.0109883	-0.093641	-0.121569	-0.199744	-0.038048	15.8788	-1188.83	1.43439e-05	0.000270427	-0.0718933	0.0993472	7.82831	0.071782	-0.298015	0.241884	-0.0328834	0.0561249	0.136991	0.134744	-0.0735226	0.0944782	7.915	0.0312107	-0.131122	0.0699177
FBgn0027929	NimB1	4.78283	4.82093	-0.0979063	0.147938	-0.134607	0.068548	-0.040846	0.0518212	-0.0480159	0.0406474	0.00636792	13.4137	-743.559	4.70454	4.69825	0.22897	-0.136703	0.151519	0.179392	-0.0258926	9.48148	-757.775	1.01924e-05	0.000207615	-0.674642	1.25734	4.79227	0.0614725	-0.0178469	0.835309	-0.118339	0.201712	0.051756	0.0364553	0.0177061	0.303221	4.85017	0.321298	0.170573	0.0475201
FBgn0028387	chm	8.20879	8.21678	0.0306368	-0.0636516	0.186428	-0.0395544	0.0170913	-0.0125288	0.0118392	-0.00554818	0.0148334	126.619	-1152.51	8.22013	8.21719	-0.058007	0.0250237	0.138482	0.0952145	0.0153109	102.811	-1169.06	1.14388e-06	4.02937e-05	0.138052	0.162972	8.20582	0.0103327	0.11008	0.413907	0.0360592	0.0560171	-0.0637818	0.284473	-0.0082639	0.0248518	8.22289	0.0152316	0.127875	0.0555679
FBgn0028394	CG17834	7.33074	7.40879	-0.0286345	0.209179	0.0636009	0.0190651	0.00287452	0.0262321	-0.00896934	-0.0201616	-0.019611	82.9211	-1040.61	7.39652	7.44348	0.197075	0.164644	-0.0823571	-0.104244	-0.00147154	63.7734	-1057.58	7.64963e-07	2.94854e-05	0.356856	0.645187	7.3579	0.0380955	0.0493724	0.0423709	0.0103817	0.0350154	-0.0169151	0.0139957	0.169047	0.0389236	7.43001	0.0335836	-0.0985473	0.126462
FBgn0028427	Ilk	8.20228	8.21203	0.0176933	-0.0444206	0.0895198	-0.052407	-0.00845591	-0.000311035	0.0078177	-4.93202e-05	0.0101673	357.032	-1054.71	8.22318	8.1811	-0.0665946	0.0082898	0.0225825	0.0337669	-0.0042993	271.877	-1067.09	5.59497e-05	0.000722398	-0.036382	0.282037	8.23682	0.163145	0.0778955	0.203546	-0.00097013	0.0876055	0.0165546	0.019325	-0.631408	4.87368	8.17366	0.0509021	0.0343803	0.00851336
FBgn0028491	CG2930	7.80884	7.87026	-0.144392	0.231815	-0.497639	-0.0103407	-0.0186245	0.0508498	-0.0587272	0.0576366	-0.0243543	11.0937	-1236.27	7.73135	7.76988	0.28493	-0.0880152	-0.0758609	-0.0712314	-0.0103921	8.23537	-1252.38	1.72613e-06	5.37338e-05	-0.246263	0.390128	7.8383	0.0778402	0.357645	0.999857	-0.0420411	0.0799289	0.0481353	0.135793	0.404064	0.329698	7.7392	0.0363026	-0.0808034	0.0221034
FBgn0028525	c(2)M	7.49045	7.44495	-0.131468	-0.0949797	0.168647	-0.0650319	0.00713817	-0.0190718	-0.00993218	-0.0163828	0.0238582	72.28	-1060.19	7.52766	7.46555	-0.128462	-0.152714	0.0568671	0.109195	0.00281461	63.0372	-1074.3	1.13298e-05	0.000223494	-0.134696	0.0299837	7.55999	0.123599	0.137887	0.285076	-0.00981003	0.0685662	0.0542452	0.06194	-0.256497	0.0839011	7.46352	0.0916033	0.0715736	0.0628418
FBgn0028572	qtc	6.92896	6.91432	-0.157336	0.042807	-0.263793	0.188956	-0.00962998	0.0296605	-0.0140249	0.0143097	-0.0464116	19.7792	-1049	6.93023	6.94241	-0.0399704	-0.0424103	-0.25102	-0.168185	-0.00858277	20.2765	-1061.01	7.94275e-05	0.000929133	-0.5343	0.683673	6.91201	0.0238892	-0.0796123	1.56256	0.249334	0.313323	-0.014589	0.0920989	-0.116583	0.219448	6.93445	0.0246137	-0.18305	0.0412814
FBgn0028740	CG6362	3.96405	3.66189	-0.318215	0.199839	-0.611933	0.420338	0.028167	-0.0108469	-0.0451036	0.0699218	-0.0125762	22.211	-628.469	3.87267	3.6699	-0.228152	-0.113471	0.0140447	0.379543	0.0313766	16.0766	-641.462	3.1865e-05	0.000486278	-0.057972	0.500404	3.91124	0.359069	-0.270852	1.05603	0.13819	0.360024	-0.0154864	0.264319	-0.120447	0.156112	3.68049	0.181239	0.0634531	0.254755
FBgn0028979	tio	4.75246	4.97156	-0.0455009	0.0272575	-0.0910436	0.243697	0.0644407	-0.0200022	-0.0368557	0.0114267	-0.0580749	34.0009	-777.509	4.98051	5.0835	-0.223648	-0.156217	-0.102322	-0.0789178	0.0415068	27.5287	-792.928	3.30321e-06	8.97732e-05	-0.0165812	0.113216	4.94397	0.219949	0.0837448	0.267746	-0.0314882	0.0583752	0.0122121	0.0926871	-0.179913	0.0739863	5.07672	0.197963	-0.0873724	0.0188793
FBgn0029092	ced-6	9.87942	9.8743	0.0136254	-0.0434028	0.0906859	-0.0499553	-0.00245107	0.000517707	0.00937606	-0.00447564	0.0148927	334.872	-1318.87	9.84552	9.8507	0.0244718	0.0235394	0.0687394	0.03669	0.00200012	230.64	-1335.33	1.23595e-06	4.19595e-05	-0.0792725	0.132521	9.87637	0.0114911	-0.040973	0.240611	0.00861353	0.0121637	-0.000790611	0.023968	0.0222074	0.012308	9.85003	0.00511709	0.0566638	0.0221749
FBgn0029114	Tollo	6.8984	6.77478	-0.236203	-0.182156	0.0563194	-0.117854	0.0333266	-0.0221729	-0.0169693	-0.0535477	0.0334047	22.8204	-1057.54	7.00056	6.81324	-0.3327	-0.237475	-0.30259	0.219391	0.0193319	18.067	-1078.5	1.72399e-08	1.30272e-06	-0.076633	0.298595	6.78961	0.225625	0.0106524	0.144028	-0.0322688	0.0142424	0.00489322	0.0724333	-0.307576	0.0960033	6.99154	0.451898	-0.280948	0.657555
FBgn0029603	CG14053	5.26266	5.68546	-0.07837	-0.014719	-0.0928663	-0.00450844	-0.014614	-0.0274953	0.0067562	-0.037759	-0.0393871	35.204	-765.748	5.35024	5.79431	-0.297928	0.0739536	-0.30853	-0.250697	-0.0330084	39.8197	-778.496	3.99923e-05	0.00057841	-0.0471134	0.048433	5.45321	0.416947	0.0860814	0.122503	0.00340092	0.0186711	-0.0298154	0.0219207	-0.223839	0.241006	5.71063	1.04012	-0.287117	0.102986
FBgn0029750	CG3323	4.15958	4.86844	-0.0837547	-0.0187222	-0.341086	-0.325845	0.0126386	-0.0120323	-0.0590624	0.00373097	0.0745682	14.3103	-728.266	4.12108	4.78898	-0.168625	-0.233624	-0.335011	0.177486	0.0146977	10.2427	-743.685	3.30542e-06	8.97732e-05	-0.015997	0.0864328	4.359	0.772386	-0.386175	0.250269	-0.0244834	0.0457819	0.134613	0.101033	-0.216454	0.0498719	4.08264	1.37708	-0.134702	0.841329
FBgn0029769	frma	7.03297	6.97623	-0.176855	-0.0817056	-0.562928	0.221297	-0.00827966	0.0421627	-0.035388	0.0387167	-0.0562621	20.1149	-1060.04	7.04015	6.96097	0.035856	-0.251898	-0.258518	-0.157372	-0.0085529	15.5778	-1078.61	1.68574e-07	8.58444e-06	-0.139589	0.148543	7.02349	0.0952921	0.142831	1.42307	0.179892	0.155301	-0.0703567	0.190929	-0.382653	0.391692	6.95588	0.093553	-0.17794	0.182935
FBgn0029826	CG6041	5.59697	5.51983	-0.222162	0.136388	-0.306825	-0.207939	-0.00798654	0.0482699	-0.0283741	0.0355997	-0.00945525	15.2216	-860.718	5.50271	5.31742	0.0329896	0.0780265	-0.0553561	-0.142813	0.0062967	13.2927	-872.999	6.16128e-05	0.000774915	0.063849	0.306854	5.67412	0.22112	-0.0890566	0.190926	-0.030617	0.0778113	0.0618619	0.0479676	0.0801356	0.0273222	5.34795	0.134475	-0.0375574	0.129908
FBgn0029848	Btnd	4.83563	5.08648	-0.0497702	-0.0844884	-0.31361	-0.104599	-0.0318008	0.0210385	-0.0184277	0.0122975	-0.0855692	12.3501	-741.159	4.98594	5.1191	-0.0971356	-0.182134	-0.306755	-0.576456	-0.0411198	11.4359	-753.911	3.9837e-05	0.000577822	-0.0591854	0.118971	4.84411	0.20994	-0.1483	1.11086	-0.0104539	0.0582377	0.00739752	0.190132	-0.070764	0.112525	5.0132	0.216941	-0.207912	0.612608
FBgn0029906	xit	6.88905	7.21323	0.00869339	-0.0153464	-0.218474	-0.262588	-0.0381452	0.0249647	-0.0194207	0.0394029	-0.00534016	56.5468	-972.225	6.81208	7.16737	0.216192	-0.120604	0.0997212	-0.300105	-0.0312466	40.5136	-986.995	6.07106e-06	0.000142473	0.00507929	0.0379418	7.2703	0.448551	-0.212498	0.0372993	0.00742677	0.537504	-0.0513642	0.108424	-0.118364	0.21721	6.90025	0.688073	0.225314	0.413394
FBgn0029930	CG12541	4.80241	4.71067	0.0412339	0.0922547	-0.358496	0.201201	0.0120928	-0.012188	-0.0447573	0.0228709	-0.0855589	17.6866	-744.316	4.85972	4.78658	0.00759232	-0.185459	-0.165649	-0.404232	0.00428304	13.036	-761.924	4.19804e-07	1.81388e-05	0.10019	0.0394524	4.46298	0.796948	-0.0608166	0.469128	-0.018886	0.0222817	0.0215494	0.125428	-0.0750159	0.135429	4.81209	0.0687842	-0.318971	0.214541
FBgn0029935	CG4615	7.7727	7.77635	0.0805538	-0.0083311	0.223425	-0.0231838	0.00688612	-0.012599	0.0156412	-0.0219164	0.00693672	158.34	-1067.58	7.78956	7.79474	0.0371522	0.101687	0.0581898	0.0143029	0.00446836	105.084	-1082.82	3.91425e-06	0.000103606	0.0547909	0.0512953	8.01834	0.295305	0.0692051	0.145617	0.0323205	0.0413945	-0.0599063	0.0405986	-0.0499344	0.168493	7.79217	0.0119568	0.0321607	0.049325
FBgn0029994	CG2254	7.78881	7.78058	-0.242451	0.0295782	-0.580244	0.164114	0.000942228	0.0311925	-0.0434505	0.0380528	-0.034327	11.992	-1219.46	7.83367	7.68564	-0.0229586	-0.192061	-0.385731	-0.0335334	0.00337848	10.7095	-1231.37	8.60803e-05	0.000989659	-0.192104	0.240061	7.79808	0.0664569	-0.500098	1.26873	-0.0278278	0.0954885	0.031498	0.208945	0.0365001	0.160516	7.7375	0.106889	-0.184542	0.506524
FBgn0030051	spirit	5.28111	5.32746	-0.218029	0.187793	-0.760257	0.153897	-0.0556837	0.0161048	-0.0290672	0.0633312	-0.0525357	14.1518	-769.879	5.28272	5.30133	-0.202135	0.0287489	-0.318686	-0.239963	-0.0498032	11.5162	-785.482	2.7787e-06	7.74892e-05	-0.720156	0.794715	5.28261	0.0394936	0.0174571	0.903332	-0.0225412	0.0629046	0.0206179	0.134011	-0.25113	1.09491	5.28744	0.0321179	-0.290767	0.0472501
FBgn0030056	CG11284	9.03773	9.06479	0.0749968	-0.0547458	0.154059	-0.0379523	0.0125131	-0.000489857	0.014597	-0.0107601	0.00944717	221.045	-1227.07	9.04806	9.06019	0.0410507	0.0369046	0.0690797	0.0314122	0.0137587	208.401	-1242.02	5.11954e-06	0.000125226	0.0488406	0.240502	9.03319	0.0238134	-0.16903	0.6746	0.000245549	0.0636123	-0.0103496	0.0201203	0.0390874	0.0396821	9.02097	0.176659	0.0606879	0.0269668
FBgn0030177	CG2972	8.46436	8.47806	-0.0535245	0.00394346	-0.0234903	-0.030223	0.00204529	0.00494505	-0.0056	0.00700115	0.0149636	206.186	-1128.61	8.43619	8.47061	-0.0344351	-0.0381247	0.0423457	0.0584381	0.00446334	202.722	-1141.49	3.55853e-05	0.000532386	-0.114801	0.210747	8.47597	0.0264269	-0.0258959	0.0769415	-0.0113724	0.0707457	0.00738725	0.0284735	-0.0403582	0.015875	8.42982	0.0228748	0.0397768	0.0223107
FBgn0030189	CG2909	6.20197	6.48567	0.206449	-0.0713493	0.120757	0.114884	-0.00178373	-0.0241472	0.0289418	-0.000763687	-0.0677854	33.1294	-923.431	6.29306	6.6098	0.100272	0.0524306	0.120957	-0.431585	-0.0154565	34.5992	-941.48	2.76267e-07	1.31402e-05	-0.0653696	0.624735	6.50232	1.35487	0.118688	0.00546263	-0.00962652	0.127597	0.0609386	0.197019	0.0150803	0.101812	6.24589	0.495344	0.0607796	0.58482
FBgn0030257	SmydA-4	5.17476	5.19168	-0.369111	0.0478998	-0.580992	0.157472	-0.00930145	0.0337657	-0.0140856	0.0418952	-0.0446978	19.2524	-784.585	5.07451	5.10296	0.0296188	-0.0567958	-0.12291	-0.104397	-0.000851067	14.4503	-797.169	4.65449e-05	0.000636461	-0.108453	0.173108	5.1966	0.0307049	-0.262594	0.486767	0.0401801	0.126956	-0.0147045	0.100885	-0.0499457	0.096404	5.0861	0.0285489	-0.0529766	0.166715
FBgn0030301	HP5	8.4393	8.25161	-0.00507121	-0.0373436	0.346565	-0.133801	0.0482711	-0.00339589	0.0393425	-0.0378693	0.0215329	19.4943	-1353.58	8.35881	8.26382	-0.0837265	0.200534	0.209415	0.0170225	0.0509361	14.1697	-1366.22	4.4053e-05	0.000615166	-0.0300742	0.0346527	8.16794	0.154598	-0.301267	0.745564	0.0786539	0.133686	-0.049763	0.0428672	0.089604	0.221639	8.32851	0.0608734	0.0279658	0.127629
FBgn0030367	Cyp311a1	5.10873	5.11669	-0.189382	0.274516	-0.374933	0.174061	-0.0252772	0.0357939	-0.0684664	0.03377	-0.0223524	18.2076	-770.531	5.08094	5.11092	0.0965504	-0.201813	-0.013496	0.0451731	-0.0263728	12.8555	-790.598	4.06014e-08	2.60572e-06	0.284314	1.02078	5.15488	0.049419	0.17582	0.872795	-0.0182449	0.129793	0.0172615	0.0268591	-0.0032612	0.36826	5.10004	0.0630968	0.042503	0.0648763
FBgn0030486	Set2	9.02848	9.0107	0.03429	-0.0961661	0.164692	-0.11041	-0.000922958	-0.00319867	0.0155607	-0.0176958	0.0220416	141.183	-1259	9.02808	8.9908	0.00746094	0.0408693	0.0610267	0.0527167	0.000284187	120.715	-1276.18	6.27811e-07	2.56882e-05	-0.153403	0.738938	9.02734	0.0496322	-0.150753	0.341078	0.0273921	0.0306656	-0.0320724	0.138711	0.0419992	0.0670008	8.98434	0.0426094	0.051283	0.0211927
FBgn0030511	CG11158	5.94942	5.99807	0.0958677	0.0838929	-0.213023	0.0526967	-0.0160433	0.014339	-0.0116141	0.0284085	-0.0180011	82.1592	-817.466	5.95671	5.99261	0.177911	0.00470394	0.000482959	-0.0570297	-0.0134896	61.4313	-834.517	7.09684e-07	2.81769e-05	0.0788201	0.0271024	5.94613	0.0619712	0.00177352	0.336286	-0.0622006	0.0613878	0.160087	0.531566	0.171816	0.104385	5.97395	0.0245954	-0.111538	0.088023
FBgn0030575	CG5321	6.10793	5.97828	-0.0964159	0.108758	-0.590663	0.0794344	-0.0335925	0.0303694	-0.0459029	0.035654	-0.065888	16.5425	-897.266	6.21736	6.14792	0.292662	-0.279169	-0.388699	-0.371721	-0.0480817	11.6865	-914.961	3.86314e-07	1.71553e-05	-0.0873776	0.162231	6.56346	0.632357	-0.631083	0.865729	0.00574657	0.0682129	-0.0332383	0.0728469	-0.369932	0.324853	6.19371	0.0695596	-0.496059	0.198452
FBgn0030598	CG9503	5.99904	6.14822	0.139999	-0.217404	0.124056	0.0194951	0.00398141	-0.0836285	-0.0167756	0.0199786	0.00472551	36.1265	-884.146	6.11026	6.27108	-0.355591	-0.32754	0.251416	0.048543	-0.0141602	21.5345	-925.025	1.11022e-16	8.00215e-14	-0.0712551	0.53219	6.14665	0.185808	0.0234005	0.206788	-0.035035	0.143035	0.0203409	0.0141569	-0.31249	0.0540815	6.25544	0.118422	0.0893624	0.217376
FBgn0030603	CG5541	8.48842	8.83819	0.207168	-0.13049	0.213339	0.182411	0.0111373	-0.00882322	0.0115701	0.021377	-0.0812763	56.528	-1278.4	8.53188	8.90555	0.0746464	-0.0168536	0.442048	-0.324822	-0.00107014	29.1743	-1319.36	1.11022e-16	8.00215e-14	0.125058	0.257813	8.55096	0.668613	0.178002	0.0698971	0.00857889	0.0279058	-0.11324	0.190226	0.103044	0.162701	8.74056	0.201997	-0.0417035	0.522742
FBgn0030628	CG9114	7.65705	7.57979	-0.0760385	-0.0694496	-0.0474984	-0.0496082	-0.00999196	0.0144553	0.0186294	-0.00287657	0.0275567	197.594	-993.407	7.60181	7.53445	0.0464259	0.0568753	-0.0855867	0.11922	-0.00241059	127.381	-1020.03	7.60392e-11	1.24998e-08	-0.0885494	0.0178886	7.6774	0.119543	-0.0584446	0.0156691	-0.0479775	0.0662414	0.015464	0.0144732	0.0408745	0.0144468	7.55066	0.0443294	-0.0185386	0.0933322
FBgn0030629	CG9123	6.68407	6.91191	0.113611	0.0529735	-0.0361977	0.0690428	0.0329923	-0.0300956	-0.0132691	0.0188974	-0.0461522	69.5072	-979.496	6.7112	6.97534	-0.0669547	-0.0723691	0.158478	-0.197027	0.0217941	50.6867	-1013.39	6.67244e-14	2.84185e-11	0.100272	0.0425845	6.86766	0.174055	0.0218554	0.142885	-0.033375	0.0229446	0.0197532	0.0806842	0.041282	0.236181	6.76407	0.573563	-0.157499	0.375043
FBgn0030665	CG15646	4.46365	4.91424	0.0357235	-0.887687	0.392471	-2.28957	-0.0642234	0.0685292	0.0353227	0.170309	0.337089	4.67745	-793.035	3.76876	4.2299	0.397862	-0.576202	1.73829	0.56414	0.0290713	3.05205	-839.976	0	0	-0.00349752	1.15376	4.75904	0.304348	-0.492555	1.5422	-0.107208	0.279918	0.203751	0.118082	0.138068	0.946201	4.17674	0.485313	0.0696105	1.08848
FBgn0030719	eIF5	9.69566	9.72604	0.0617044	0.0585297	0.114106	0.0114539	0.0197535	-0.000599427	0.00699342	-0.023977	-0.0106819	163.897	-1359.79	9.74281	9.7592	0.0665238	0.0994761	-0.0715417	-0.0603454	0.0150209	133.362	-1380.67	1.86824e-08	1.35701e-06	0.0663484	0.0790735	9.75799	0.0731924	-0.0103282	0.3624	0.00341585	0.00882941	-0.0143667	0.00886072	0.196736	0.511909	9.75361	0.0143239	-0.0567149	0.0332649
FBgn0030773	CG9676	7.76636	7.82447	0.0442754	0.300687	-0.0315694	0.456087	-0.00175587	-0.121351	-0.113659	-0.00136333	-0.0867308	9.0736	-1213.78	8.19892	8.21377	-0.699299	-0.458767	-0.0869907	-0.0659108	-0.0614947	7.56422	-1239.68	1.51972e-10	2.29674e-08	0.142928	0.164309	7.82175	0.1842	0.630311	0.561565	-0.133115	0.0148708	0.0564707	0.153316	-0.874839	0.678387	8.18831	0.262921	-0.0885947	0.0466437
FBgn0030775	CG9673	7.69054	7.67798	-0.273331	0.267469	-0.457121	0.115914	-0.0231828	0.0556394	-0.0694277	0.0371076	-0.0326289	10.9258	-1189.1	7.6719	7.6482	0.0597836	-0.0772806	-0.154598	-0.0865015	-0.0275759	10.3984	-1204.12	4.79596e-06	0.000119414	-0.197412	0.449956	7.70172	0.0433455	0.556504	0.580042	-0.00186335	0.0986314	0.0103675	0.0811284	-0.0222167	0.231594	7.63689	0.103224	-0.154439	0.0751572
FBgn0030777	CG9672	7.47511	7.17272	-0.149999	0.62963	-0.249556	0.11461	-0.0471993	0.121642	-0.0909473	0.0556287	-0.00908215	7.07973	-1180.92	7.37285	6.97016	0.555863	0.113322	0.131056	0.104821	-0.0251247	5.04638	-1197.89	7.7083e-07	2.94854e-05	0.276543	0.78265	7.32566	0.395585	0.232429	0.532083	-0.10555	0.20771	0.001446	0.0466427	0.420973	0.489457	7.06076	0.187452	0.119341	0.206544
FBgn0030828	CG5162	7.18818	7.00954	0.164515	0.254996	0.0514204	0.427318	-0.0536681	0.0578193	-0.072198	-0.0160342	-0.0523404	7.41676	-1113.04	7.1955	7.04953	0.580276	-0.133898	-0.051862	0.0415801	-0.0601038	6.43823	-1128.22	4.14577e-06	0.000107398	0.245491	0.290582	6.9857	0.129236	0.0239474	0.273239	0.0325858	0.233091	-0.0579302	0.127556	0.00716948	0.357459	7.11356	0.179719	-0.0397437	0.10093
FBgn0030876	CG6762	5.95139	5.9306	-0.0414778	-0.103437	-0.184915	0.0599009	-0.0190228	0.0234237	0.00740417	0.0246982	-0.0249043	62.8877	-811.806	5.9703	5.93229	0.101517	-0.0517084	-0.0324731	-0.137749	-0.016359	54.3749	-828.397	1.09616e-06	3.92024e-05	-0.0774185	0.0615341	5.93116	0.0194388	-0.514476	0.98982	0.00374532	0.0413529	-0.0136112	0.050211	0.00144465	0.190067	5.96574	0.0822335	-0.119855	0.0967839
FBgn0030912	CG6023	5.60534	5.67186	0.0709725	0.0453497	0.252986	0.194507	0.0365139	-0.00266448	0.00350296	-0.0321252	-0.0890037	47.4662	-835.735	5.78266	5.78927	0.0792492	0.0883626	0.00420435	-0.376996	0.0156977	29.1269	-871.995	6.66134e-15	3.67157e-12	-0.0488006	0.235572	5.60815	0.115849	0.230347	0.0393131	0.0262219	0.0778313	-0.0668866	0.0509591	0.00915558	0.0714777	5.78861	0.0271832	-0.22859	0.298118
FBgn0030925	Hayan	5.65941	5.64756	0.100443	0.118863	-0.154369	0.245113	0.0243711	0.00349928	-0.0308794	0.00979529	-0.0539097	22.1819	-878.005	5.72372	5.72568	0.0459593	-0.0525611	-0.0900553	-0.0984399	0.00822611	21.0985	-890.453	5.28225e-05	0.000693203	0.0979439	0.0555153	5.65463	0.0477876	0.1987	0.146653	0.00846885	0.108854	-0.00361098	0.0446293	-0.056731	0.245351	5.73043	0.0364188	-0.116521	0.0489147
FBgn0030960	Atg101	7.51617	7.40862	0.0456498	0.0450281	0.0150192	0.133957	0.00581864	-0.000917268	0.000859147	-0.0125491	-0.0316057	124.47	-1018.76	7.59001	7.46495	-0.0495277	0.0211423	-0.120559	-0.114789	-0.0022165	95.7859	-1031.9	2.7795e-05	0.000441423	0.042143	0.00834059	7.33987	0.241718	0.0513392	0.062488	0.018055	0.0181362	-0.0203322	0.0173748	0.0627409	0.21053	7.49853	0.0768733	-0.111944	0.0498634
FBgn0030984	tgy	4.92507	5.03121	0.0387945	0.0423211	-0.514161	-0.096335	-0.0151543	0.0341343	-0.0331164	0.0568926	-0.0145316	12.365	-780.686	4.92018	4.92226	0.0477981	-0.163415	-0.13281	-0.0987403	-0.00706964	10.8009	-794.038	2.28252e-05	0.000381233	0.0117773	0.289992	5.03494	0.100676	-0.208411	0.477628	-0.0410595	0.0390911	0.100081	0.254297	0.107458	0.286516	4.94313	0.174818	-0.152715	0.0592064
FBgn0030998	CG14195	5.2674	5.26216	-0.132342	0.0701238	-0.357045	0.114912	-0.0497107	0.0609192	-0.0191788	0.0502762	-0.0649515	8.84192	-815.577	5.26105	5.09604	0.206502	0.00323708	-0.156675	-0.194704	-0.0362405	7.02607	-833.206	4.11241e-07	1.80062e-05	-0.112162	0.26644	5.22289	0.0586856	-0.963524	2.8418	0.0444085	0.0807805	-0.0540028	0.397315	0.0689928	0.0785735	4.58542	1.16373	-0.159069	0.0400233
FBgn0031002	CG14196	6.33767	6.34268	-0.158032	0.0272538	-0.276477	0.190721	-0.0184502	0.0473955	-0.017297	0.026982	-0.0369158	21.616	-945.453	6.23831	6.25567	0.268959	-0.0788145	-0.0367388	-0.103596	-0.00626214	17.822	-965.628	3.66297e-08	2.40014e-06	-0.378035	0.550158	6.34319	0.020693	-0.491727	1.21019	0.0174277	0.0489638	-0.00253502	0.246232	0.0916746	0.23048	6.20718	0.0670372	0.102661	0.171253
FBgn0031004	CG7992	6.64931	6.6281	-0.0365817	0.142565	-0.354709	0.11433	-0.0363557	0.0235239	-0.054062	0.0314733	-0.036427	11.4271	-1010.75	6.719	6.67708	0.381839	-0.185749	-0.0966646	-0.084707	-0.0471659	8.92129	-1025.73	4.97114e-06	0.000122256	0.148605	0.20471	6.66472	0.119521	-0.152785	0.467599	-0.0111759	0.0633656	0.075866	0.103558	0.0815734	0.25445	6.70975	0.0981894	-0.184013	0.132322
FBgn0031055	et	5.39329	5.36571	-0.326692	0.0173864	-0.500332	0.209153	-0.0145034	0.0807818	-0.0406362	0.0586403	-0.043029	14.4889	-829.523	5.33194	5.29446	-0.00572246	-0.26357	-0.0470479	-0.183869	-0.00403214	9.96363	-856.786	4.08196e-11	7.21659e-09	0.243775	1.14584	5.39297	0.076433	-0.0555097	0.477639	0.0155409	0.0821837	-0.012413	0.420145	-0.238087	0.568288	5.34317	0.058952	-0.137979	0.0890656
FBgn0031117	GstT3	7.77767	7.81636	-0.09778	-0.197155	-0.0272982	-0.0930947	-0.0389067	0.0316065	0.00662181	0.0268489	0.0274621	96.153	-1052.85	7.68583	7.70529	0.126345	-0.118668	0.138742	0.084117	-0.0228881	76.9564	-1066.28	2.1312e-05	0.000361764	-0.159913	0.095197	7.79678	0.0132826	-0.166881	0.171546	-0.0233043	0.0422917	0.0271967	0.00834973	-0.0772046	0.118491	7.54512	0.166729	0.135777	0.0512311
FBgn0031157	CG1503	6.12323	6.53316	-0.0743487	-0.060774	-0.288783	-0.15078	0.0260076	-0.0383815	0.00652511	0.0490415	0.0190977	37.3168	-944.722	6.15743	6.49312	-0.329312	0.0223892	0.0823663	0.0558097	0.0255043	28.0117	-972.582	2.29573e-11	4.39e-09	-0.0548916	0.0368004	5.85012	1.8592	-0.126694	0.74079	-0.0712702	0.112202	0.020038	0.0373341	-0.442927	0.555092	6.23132	0.204053	0.0855435	0.0462341
FBgn0031161	CG15445	7.98378	7.95113	-0.020395	-0.00332678	-0.0599587	-0.00348369	-0.0136603	0.00365388	-0.0066487	0.0131691	0.00977066	248.437	-1019.39	7.98003	7.95364	0.0388611	-0.0445506	0.00177242	0.0421092	-0.011785	231.1	-1031.95	4.73357e-05	0.000642805	-0.00218202	0.031325	7.97494	0.0190159	-0.0689423	0.0733152	-0.0381591	0.045904	0.0156416	0.015509	-0.0271166	0.0506899	7.96565	0.0229157	0.00508678	0.0406691
FBgn0031248	CG11912	6.25751	6.25547	-0.227105	-0.0509978	-1.22654	-0.406224	-0.0478108	0.0540562	-0.110999	0.0800732	0.0237517	3.42543	-994.029	5.94509	6.08743	0.336409	-0.540622	-0.307307	-0.161071	-0.0357234	2.56066	-1009.11	4.5413e-06	0.000113775	-0.216036	0.188212	6.24881	0.140073	-0.586151	1.04776	-0.00379229	0.117363	0.136446	0.0667191	0.0770941	0.367394	6.09526	0.12494	-0.130049	0.210835
FBgn0031307	MFS3	4.7306	4.69835	-0.091064	0.118017	-0.285753	0.184535	0.00682972	0.0332149	-0.0125198	0.0169586	-0.0578437	17.7589	-754.927	4.70556	4.73421	0.182764	0.0403271	-0.136815	-0.172532	0.00278089	13.7451	-769.175	9.89686e-06	0.00020471	0.0409864	0.223589	4.55086	0.190058	-0.302775	0.474527	0.102853	0.134098	-0.00404577	0.231093	0.120735	0.191249	4.70747	0.0752585	-0.154271	0.035825
FBgn0031313	CG5080	7.70677	7.52318	-0.0102795	0.0496702	-0.660454	0.189383	-0.0114212	0.0126258	-0.0472736	0.0560108	-0.0501384	17.1015	-1150.51	7.761	7.52483	-0.0548972	-0.227697	-0.25965	-0.094988	-0.0162093	14.5614	-1168.68	2.47663e-07	1.20239e-05	0.0414701	0.183474	7.62362	0.401322	-0.700583	1.83589	-0.0306897	0.0529424	0.0629343	0.250698	-0.0497138	0.232312	7.77571	0.191101	-0.358313	0.147391
FBgn0031449	CG31689	8.92095	8.88855	0.0805112	0.0645874	0.178957	0.0759779	0.0107487	-0.0180606	-0.00163294	-0.0127022	0.00494017	301.539	-1183.49	8.96077	8.93526	-0.0431429	0.0325362	0.0936535	0.105543	0.0042762	242.044	-1202.85	7.96477e-08	4.49578e-06	0.0593943	0.0170749	9.03933	0.534078	0.172672	0.0753177	-0.00665915	0.0095219	0.231774	0.496816	-0.0449729	0.111704	8.94119	0.0151309	0.0926395	0.016571
FBgn0031473	CG3104	6.08591	6.09476	-0.056332	0.0142576	-0.336288	0.0937138	0.0119075	-0.0259369	-0.00884993	0.0266798	-0.0379002	52.2202	-868.431	6.04941	6.07142	-0.109843	-0.0374111	-0.12762	-0.131732	0.0105943	45.8885	-883.665	3.92795e-06	0.000103676	-0.0239452	0.0273789	6.09616	0.0181728	0.0778562	0.306398	-0.0217832	0.076279	0.0335744	0.0778126	0.0547305	0.161934	6.07366	0.0210915	-0.118907	0.064949
FBgn0031483	CG9641	9.2047	9.51622	0.117023	-0.182084	0.0920798	-0.196057	0.0190481	-0.0312676	-0.00891569	0.000390686	0.0368613	73.6903	-1363.45	9.21315	9.53845	-0.0570112	-0.290789	0.063625	0.0563369	0.0192255	54.4519	-1392.44	7.75446e-12	1.77218e-09	-0.0125488	0.176273	9.38829	0.290822	-0.14199	1.02033	0.0122999	0.0958893	-0.00205736	0.0282153	-0.252117	0.241384	9.27108	0.960021	0.0698381	0.064788
FBgn0031489	CG17224	7.24806	7.27888	-0.367197	-0.307086	-0.397612	-0.210345	-0.0328516	0.0846716	-0.00140366	0.0198952	-0.00696838	10.5253	-1105.28	7.14193	7.10343	0.342877	-0.294123	-0.264084	-0.227588	-0.016752	10.231	-1117.4	7.16445e-05	0.000859551	-0.360416	0.0654223	7.22402	0.139732	-0.154986	0.249634	-0.0811101	0.122789	0.0238276	0.0529668	0.136891	0.399066	7.14099	0.0474953	-0.239714	0.145108
FBgn0031490	CG17264	5.27349	5.29477	-0.463937	-0.0312376	-0.960491	-0.179477	-0.0219223	0.146952	-0.0176859	0.0710034	-0.00240042	7.06563	-852.497	5.0162	5.02471	0.590011	-0.172688	-0.483918	-0.152803	0.0130176	5.33457	-868.254	2.40331e-06	6.86554e-05	-0.267416	0.504129	4.99376	0.248006	-0.480197	0.655922	-0.0631645	0.245574	0.0232129	0.0396687	0.0964903	1.63117	5.02096	0.0236596	-0.436916	0.433174
FBgn0031514	CG3332	6.62829	6.6102	-0.344928	0.344102	-0.627099	0.122796	-0.0230199	0.079393	-0.0738106	0.0598666	-0.0362371	7.67161	-1054.8	6.514	6.51909	0.436734	-0.0178407	-0.0193148	-0.0136181	-0.0250551	6.39053	-1075.49	2.24508e-08	1.60583e-06	-0.2766	0.435186	6.55958	0.0992499	0.10984	0.786978	-0.0346953	0.0534501	0.0533904	0.297427	0.36123	0.544155	6.50168	0.0325861	-0.0131619	0.0427689
FBgn0031517	CG15406	7.53613	7.62311	0.0136824	-0.00406309	-0.321943	0.170989	-0.0232044	0.00386896	-0.0226566	0.0354229	-0.0635105	13.9761	-1156.8	7.59134	7.73845	0.149253	-0.0900701	-0.0826672	-0.282948	-0.0338662	10.6674	-1170.17	2.23399e-05	0.000374463	-0.00243094	0.211799	7.56181	0.158104	0.108336	0.35128	-0.00203478	0.0441742	0.314319	0.841747	0.0192179	0.129123	7.71953	0.11528	-0.13764	0.233933
FBgn0031522	CG3285	5.60504	5.59377	0.0439367	0.437865	-0.327807	0.187363	-0.0306237	0.0105449	-0.0775566	0.0374316	-0.0655467	12.8553	-855.294	5.81578	5.73289	-0.0546488	-0.110769	-0.24081	-0.298964	-0.0422316	10.18	-877.655	4.54426e-09	4.48208e-07	0.0127658	1.14455	5.61598	0.0447477	-0.0284043	0.342631	-0.420379	0.334464	0.0534862	0.108734	-0.163638	0.140133	5.73486	0.1193	-0.278687	0.0662978
FBgn0031538	CG3246	7.23276	7.23717	-0.0926891	-0.192439	-0.506046	0.0336543	-0.0340693	0.0480492	-0.00736581	0.0396	-0.040396	15.8505	-1084.63	7.21762	7.17221	0.31031	-0.113869	-0.154929	-0.270766	-0.0303784	13.4557	-1098.09	2.05184e-05	0.000350195	-0.138433	0.297708	7.22466	0.0207263	-0.228521	0.53733	0.0250861	0.0345719	-0.0360985	0.093348	-0.0118374	0.478151	7.15458	0.105165	-0.168958	0.178126
FBgn0031579	CG15422	6.13714	6.13381	-0.0218764	0.125059	-0.473328	-0.0178221	-0.019673	0.0210236	-0.0224002	0.0506661	-0.0173112	15.709	-941.649	6.10855	5.99166	0.15754	0.0635275	0.020601	0.0265301	-0.0147051	12.9824	-953.57	8.58521e-05	0.000988248	0.186948	0.183884	6.13469	0.0826055	-0.209527	0.887414	-0.00219051	0.0507842	0.574629	2.20761	0.0860686	0.0866674	6.06257	0.0804582	0.0584465	0.0649072
FBgn0031655	Marcal1	7.73326	7.76257	0.0732335	-0.0746725	0.148528	-0.0505693	0.00207589	-0.00468373	0.0142854	-0.00788005	0.0146012	189.822	-1039.71	7.77301	7.76708	0.0443948	0.019878	0.0580897	0.0537516	0.000495532	135.608	-1056.13	1.29363e-06	4.35551e-05	0.0565853	0.14555	7.7426	0.0616214	0.169133	0.57921	-0.000450321	0.0932751	0.028471	0.0456007	-0.0117978	0.0433314	7.7899	0.0649416	0.0587678	0.0250008
FBgn0031741	CG11034	7.01655	6.30872	0.477833	0.238552	-0.0444225	0.419127	0.0238878	-0.157524	-0.0132984	-0.0578157	-0.0744764	10.0057	-1074.01	7.25681	6.72083	-0.642474	0.0800656	-0.390658	-0.0809444	-0.027853	7.91311	-1098.96	3.80543e-10	5.0221e-08	0.599586	0.615676	6.33356	0.815597	0.163148	0.452477	0.0290881	0.18554	-0.0469105	0.0268687	-0.168171	0.555554	6.86463	0.362823	-0.268433	0.748061
FBgn0031760	Tsp26A	6.67458	6.25242	-0.0306177	0.0776957	-0.481254	-0.426668	0.0326705	-0.122345	-0.0908872	0.0484403	0.0256315	12.0358	-1022.79	6.78807	6.43943	-0.750489	-0.476617	-0.0898012	-0.119999	0.00868135	7.72676	-1060.09	2.44249e-15	1.43038e-12	0.0219127	0.247802	6.41813	0.243653	-0.261798	0.295463	-0.164378	0.15693	0.0656103	0.0279441	-0.626668	0.18348	6.60923	0.103438	-0.0967248	0.0456744
FBgn0031773	Fbw5	7.40013	7.40787	0.0839641	-0.00790917	0.151111	-0.0552423	0.00273131	-0.0146685	0.00473054	-0.00940972	0.0048167	196.322	-979.399	7.44424	7.43423	0.0404561	0.0298999	0.0607404	-0.0120805	-0.00147662	178.489	-991.349	8.36129e-05	0.00096962	0.125876	1.94309	7.40533	0.0217248	-0.0572223	0.155042	-0.0475687	0.0353892	0.00465434	0.0209762	-0.00311232	0.0270422	7.44216	0.0176159	0.0559426	0.10156
FBgn0031910	CG15818	6.01447	6.50317	0.111167	0.0904544	-0.206683	-0.273869	-0.0182221	0.0654695	-0.0140032	0.0438074	-0.0174505	8.65048	-1010.84	5.89254	6.32927	0.449645	0.00779149	0.00435176	-0.321538	0.00227637	7.37107	-1024.57	1.60534e-05	0.000293804	0.0731933	0.177579	6.41043	0.418678	-0.165534	0.0817641	0.0504641	0.094887	-0.0286681	0.0706763	0.0780072	0.337007	6.11919	0.255407	-0.324028	0.248503
FBgn0031974	CG12560	6.50425	7.50194	-0.0275192	-0.459999	0.084797	-0.569556	-0.0901387	0.122746	0.0477584	-0.0584772	0.105759	21.3065	-996.473	6.26376	7.31249	0.903428	-0.121817	-0.304355	0.104623	-0.0577846	8.98311	-1058.61	0	0	0.146035	0.344799	6.45991	0.68759	-0.328686	0.336495	0.0834051	0.0613232	-0.0363776	0.12825	0.690845	1.26931	6.81245	1.16652	-0.182891	0.434126
FBgn0032013	Scgalpha	4.49866	4.49191	-0.0160458	0.15831	-0.15705	0.305855	-0.00392487	-0.0117015	-0.0322212	-0.000523938	-0.0678883	18.9955	-691.912	4.70793	4.62635	-0.122946	-0.0207025	-0.192721	-0.186053	-0.0240849	14.294	-705.63	1.62349e-05	0.000294379	-0.201543	0.465098	4.49946	0.068695	0.213377	0.207596	-0.033028	0.0171018	0.00905486	0.0908178	-0.0237919	0.0171194	4.72672	0.255985	-0.183922	0.017297
FBgn0032087	CG9568	6.94147	6.98527	-0.200261	0.439833	-0.75028	0.0572599	-0.00765488	0.0438321	-0.089479	0.0821213	-0.0170242	10.384	-1107.64	6.88116	6.91055	0.175802	-0.0586723	-0.107082	-0.064275	-0.00272159	7.21604	-1133.18	2.16322e-10	3.02528e-08	0.0223936	0.965562	6.92856	0.117013	-0.230506	0.454328	-0.0473957	0.248573	0.137442	0.251997	-0.0159298	0.353394	6.88104	0.0439423	-0.0956393	0.0369565
FBgn0032123	Oatp30B	8.43278	8.40809	0.0802484	-0.0492547	0.179219	0.0450002	0.00865428	-0.00867596	0.0139843	-0.0164912	-0.00384248	167.025	-1163.07	8.46047	8.42535	0.0382017	0.061315	0.0534498	0.0216924	0.00513907	130.406	-1175.44	5.71302e-05	0.000732299	0.0739776	0.13841	8.43546	0.0426685	-0.283372	0.304649	0.0300111	0.0298359	-0.0359779	0.09833	0.0992057	0.0764531	8.38263	0.0951754	0.0289682	0.0299328
FBgn0032136	Apoltp	8.10246	8.10738	-0.196733	0.0422252	-0.292554	0.031134	-0.0109338	0.0582411	-0.0260745	0.0327383	-0.00950705	23.9639	-1222.88	7.98199	7.95421	0.224798	-0.0901702	-0.0580514	0.0641483	0.00252982	18.7573	-1243.06	3.64687e-08	2.40014e-06	-0.0733458	0.296878	8.08541	0.144107	0.281595	0.410976	-0.00581549	0.0878225	0.101992	0.0707452	0.0753453	0.17658	7.97798	0.0707352	0.00232341	0.0607716
FBgn0032147	IP3K1	7.68482	7.42985	0.0379755	0.259807	-0.0986628	0.232048	0.0218274	-0.00359869	0.00714381	-0.011715	-0.0292713	70.9279	-1093.64	7.71934	7.46809	-0.00439982	0.365729	-0.155608	0.0385056	0.0128311	63.4061	-1106.47	3.69013e-05	0.000542991	0.0193153	0.287412	7.52985	0.143841	0.138281	0.134844	0.0189598	0.0287801	-0.1667	0.311097	-0.040876	0.770701	7.54337	0.297779	0.0329474	0.308126
FBgn0032161	CG4594	7.2953	6.92162	-0.0373421	0.0830876	-0.310411	0.326228	-0.0371139	0.00172299	0.0375581	0.0234291	-0.122042	21.0566	-1049.98	7.2823	6.95929	0.00210538	0.305605	-0.0801128	-0.556001	-0.0355997	11.4785	-1093.59	0	0	0.144979	0.228661	6.84716	0.455473	-0.178532	1.08263	0.0242216	0.0243793	-0.0739763	0.113129	0.333493	0.344358	7.07539	0.376153	-0.358074	0.387846
FBgn0032219	CG4995	4.97657	4.92665	0.0616619	0.0729198	-0.791947	0.129485	-0.0439507	0.0136552	-0.0399118	0.0770741	-0.0402874	11.8947	-751.292	4.9797	4.8775	0.188607	-0.16869	-0.316077	-0.257828	-0.0353731	9.86916	-763.537	6.36851e-05	0.000791418	0.0788951	0.170984	4.94883	0.039843	-0.432817	0.846597	-0.0172808	0.0298913	0.0159218	0.0792813	-0.076067	0.0897939	5.02132	0.343199	-0.278929	0.0543851
FBgn0032343	CG6201	6.50048	6.48494	0.144786	0.0206305	-0.000539852	0.0501555	0.00628064	-0.0136938	-0.00870792	0.0151335	0.0289767	109.415	-891.489	6.47342	6.4271	0.0474731	-0.00537725	0.0883736	0.22361	0.0121691	90.4021	-910.539	1.0683e-07	5.7861e-06	0.0839631	0.213343	6.07047	1.11263	0.0128826	0.0409342	-0.00967407	0.0119833	0.011004	0.0218299	0.0668621	0.26084	6.45092	0.0296616	0.0312921	0.131397
FBgn0032422	atilla	7.39975	7.36221	-0.175075	0.0253787	-0.311164	0.0831961	-0.0358347	0.0187862	-0.00556119	0.026368	-0.0256113	40.7506	-1050.95	7.38455	7.35709	-0.0272592	-0.0804807	-0.15252	-0.126154	-0.0335536	31.1643	-1063.91	3.274e-05	0.000497202	0.104928	0.41971	7.37651	0.0307204	-0.129065	0.432507	0.00897036	0.0339114	-0.0168531	0.0779993	-0.0507454	0.0754421	7.36448	0.0553164	-0.139951	0.037487
FBgn0032486	mRF1	7.06839	7.14113	0.0331491	-0.0477934	0.107081	-0.155358	-0.00928122	0.00459282	0.0102632	-0.000682358	0.0258581	213.378	-923.444	7.05301	7.10107	0.0323308	0.016659	0.0755167	0.0635457	-0.00399239	155.977	-936.524	2.9374e-05	0.00045796	0.0553203	0.0465906	7.09781	0.0634802	-0.0324987	0.382749	-0.00350683	0.030825	0.0948501	0.157995	-0.039496	0.0634051	6.94434	0.166308	0.0665305	0.0151383
FBgn0032668	CG17681	4.30761	4.14681	0.0378105	0.0524471	-0.00654649	-0.248876	-0.0447407	0.0807953	0.041493	-0.00766486	0.0439542	20.5976	-652.284	4.1449	4.13698	0.582503	0.158157	-0.0241947	-0.0215727	-0.0232882	15.2687	-664.893	4.54922e-05	0.000626856	0.0373652	0.027676	4.1562	0.261248	0.0351473	0.41047	-0.123003	0.224683	0.0601007	0.0402579	0.377774	0.376024	4.12488	0.140235	-0.0253563	0.0410256
FBgn0032683	kon	5.37686	5.44585	0.103313	0.343745	-0.177256	0.356367	0.00432547	-0.00652112	-0.0457509	0.011667	-0.0695186	24.0375	-820.105	5.56551	5.59246	-0.0318097	0.0144333	-0.16449	-0.134459	-0.0184349	19.7104	-834.274	1.06522e-05	0.000213728	0.212482	0.419162	5.43618	0.160655	0.123567	1.29598	-0.0276286	0.0209595	0.0754371	0.170927	0.0396789	0.103571	5.5905	0.0230515	-0.136746	0.0539677
FBgn0032688	CG15160	8.20691	8.17572	-0.110902	-0.181575	0.0956096	-0.0989701	0.00830083	0.00132993	0.0288092	-0.0124583	0.0393319	54.2441	-1191.12	8.13978	8.13536	-0.0798518	0.0130136	0.0518962	0.173727	0.0146817	45.6252	-1209.57	1.87612e-07	9.45123e-06	-0.0180444	0.222586	8.19019	0.180495	0.0520186	0.0889483	-0.000909035	0.026181	0.0543799	0.0477928	0.0081796	0.0550755	8.16267	0.0642598	0.0941509	0.150191
FBgn0032694	MESR3	7.25506	7.15924	0.0413672	0.20782	-0.184024	0.195134	0.0084305	-0.0100734	-0.025254	0.0178979	-0.0234886	101.5	-1000.51	7.27782	7.23841	-0.0444741	0.0174506	-0.00187479	-0.00389577	-5.27231e-05	82.481	-1015.9	3.40236e-06	9.16096e-05	0.17358	0.221355	6.72046	0.713365	-0.163327	0.442179	-0.0127137	0.0837489	0.0201229	0.0296655	-0.00529824	0.0602113	7.27427	0.0316771	0.00692235	0.0451094
FBgn0032723	ssp3	8.11765	8.18408	0.0743149	-0.0903167	0.171103	-0.0636585	0.0185795	-0.00703253	0.0165105	-0.0161782	0.0168209	126.532	-1145.7	8.09251	8.1458	-0.00518338	0.045582	0.0610593	0.0704908	0.0219736	94.2681	-1161.37	2.59517e-06	7.28047e-05	0.522259	0.701897	8.13268	0.0688604	-0.0695184	0.236158	0.0228612	0.176353	-0.0603043	0.102361	0.0820095	0.0673347	8.12675	0.0287533	0.0969384	0.0351107
FBgn0032733	CG15170	4.60533	4.81743	-0.157698	0.233252	0.0952147	0.0528237	0.00895709	0.00127097	-0.137975	0.0110456	-0.0342998	9.15694	-775.377	4.82905	4.919	-0.211105	-0.553045	0.166049	0.00440463	-0.0214495	8.21147	-787.67	6.09262e-05	0.000772124	0.00773908	0.299191	4.74038	0.111714	0.0998438	0.0807869	-0.0587344	0.172432	0.0036972	0.0416699	-0.679968	0.375434	4.89357	0.0758179	0.0662163	0.0919455
FBgn0032763	CG17568	7.47915	7.48455	0.0205714	-0.0480736	0.213882	-0.214261	-0.012556	0.0110148	0.0281075	-0.0123356	0.0353879	47.3511	-1083.75	7.39311	7.41635	0.159814	0.115161	0.157233	0.0464647	-0.00105844	39.7432	-1096.79	3.0442e-05	0.000469147	0.0171131	0.0526322	7.48684	0.01106	0.301351	1.68481	-0.0244168	0.265265	0.0239951	0.0421225	0.0780228	0.0642412	7.38333	0.0524272	-0.0178155	0.32683
FBgn0032773	fon	8.16389	8.26675	-0.21079	0.126746	-0.413508	-0.0301064	0.00112299	0.0597849	-0.0604629	0.0516057	-0.00865222	14.4844	-1289.95	8.15759	8.22969	0.140592	-0.234704	-0.074498	-0.0890092	0.00601845	8.55882	-1315.39	2.37049e-10	3.26639e-08	0.165214	1.59081	8.18614	0.0987185	-0.0923255	0.263548	0.015168	0.0819097	-0.00156164	0.0488995	0.0816544	0.656897	8.21088	0.0456444	-0.0469866	0.0489256
FBgn0032780	CG13085	4.21103	4.23456	-0.10481	0.199708	-0.25545	0.234351	0.00193256	-0.0230164	-0.0326858	0.0186157	-0.0507115	30.7692	-630.846	4.35781	4.40868	-0.370798	-0.0626685	-0.17136	-0.137957	-0.020008	23.1184	-644.5	1.72203e-05	0.000308247	-0.129671	0.223585	4.24108	0.0479954	0.0992779	0.291666	0.00746209	0.0907606	-0.0206599	0.185239	-0.179299	0.205185	4.36001	0.0927402	-0.204348	0.107707
FBgn0032785	CG10026	5.78972	5.72913	-0.0551246	0.190884	-0.509475	0.197933	-0.0151692	0.0137797	-0.0317079	0.0205162	-0.050599	16.042	-875.589	5.83542	5.75247	0.0691067	0.038144	-0.363287	-0.108825	-0.0247101	14.9464	-888.98	2.19905e-05	0.000370595	0.0644076	0.664386	5.73509	0.0343636	0.0144133	0.356019	0.0200782	0.0388339	-0.00192946	0.347373	0.000390017	0.04306	5.81733	0.0922842	-0.227747	0.185426
FBgn0032858	CG10949	6.97891	6.9786	-0.00980897	-0.163071	0.0342573	-0.0824542	-0.00523978	-0.00441786	0.0142224	0.0162294	0.0219169	137.734	-939.968	6.92045	6.91941	-0.0812638	-0.0428498	0.140988	0.0854046	0.00207612	108.785	-953.332	2.25667e-05	0.00037759	-0.0849424	0.10338	6.96653	0.0238784	-0.218542	0.363075	-0.0243875	0.428155	0.0291358	0.0987739	-0.0704848	0.0587231	6.94706	0.0549283	0.190043	0.100137
FBgn0032908	CG9270	4.74761	4.75725	-0.041832	0.269526	-0.29165	0.478815	-0.00227453	0.0277899	-0.02533	0.029822	-0.0516503	22.3171	-740.562	4.80796	4.86867	-0.113288	-0.0252053	-0.117175	0.0114466	-0.000940419	16.6725	-755.992	3.26824e-06	8.92812e-05	0.232305	0.234319	4.72796	0.0452834	0.724448	0.876758	0.0642694	0.125953	-0.00484653	0.25453	-0.0034826	0.0771323	4.7976	0.0453352	-0.068837	0.104911
FBgn0032934	CG8679	7.83103	7.87262	0.00409997	0.000498628	0.177855	-0.059795	0.0147098	-0.00178029	0.0146041	-0.0289642	0.00416634	96.4316	-1108.23	7.85897	7.9278	0.0109975	0.00805606	-0.039622	-0.0953431	0.0133885	73.2459	-1130.98	3.13977e-09	3.23293e-07	-0.00251735	0.0724488	7.80786	0.051811	-0.0346973	0.188565	-0.190293	0.211193	0.0179816	0.08596	-6.51553e-05	0.0302869	7.90071	0.0850459	-0.0408156	0.169929
FBgn0033234	MFS12	6.36723	6.51924	-0.110849	0.302768	-0.050994	-0.00907363	-0.0155349	0.0211847	-0.0480024	-0.00491614	-0.00527133	49.3894	-929.034	6.41435	6.48362	0.00297538	0.00208184	-0.164826	0.072493	-0.0194874	31.3287	-943.026	1.25644e-05	0.00024425	0.488077	0.522148	6.41761	0.103621	0.00681237	0.0550101	-0.0249391	0.0412929	0.00566396	0.0184508	-0.00964789	0.0227606	6.47746	0.073995	-0.0368997	0.285891
FBgn0033258	CG8712	7.61908	7.67067	-0.051397	-0.0988336	0.13441	-0.093311	0.0119828	0.00888956	0.0219098	-0.0090989	0.0234408	102.167	-1075.08	7.51561	7.58263	0.050103	0.0805155	0.0764807	0.101938	0.0223831	79.1902	-1087.5	5.42464e-05	0.000707923	-0.190514	0.443716	7.65573	0.067577	-0.0823459	0.120142	0.0157482	0.00980034	-0.00236305	0.0671189	0.0824177	0.0245153	7.51212	0.0681061	0.0883242	0.0362392
FBgn0033304	Cyp6a13	6.7376	6.797	-0.142418	0.0272817	-0.467556	-0.149578	-0.0283689	0.0578905	-0.0152954	0.0521783	0.00595036	23.8438	-1009.56	6.65361	6.71262	0.420349	-0.0910921	-0.115445	-0.141406	-0.0115926	15.7927	-1026.68	6.66326e-07	2.7028e-05	-0.0666661	0.0736789	6.71737	0.0831312	-0.258153	0.95937	-0.0196766	0.0485353	0.0391292	0.0841448	-0.17001	0.43707	6.67726	0.0244092	-0.101065	0.136291
FBgn0033327	PGRP-SC1b	4.79694	4.47173	-0.0338676	-0.102984	-0.562298	-0.301411	-0.0683782	0.0161408	-0.060954	0.137487	-0.0911231	2.03272	-761.047	4.66227	4.23423	-0.0512313	-0.288527	0.397571	-0.92528	-0.0450151	1.72441	-774.768	1.6191e-05	0.000294379	-0.155964	0.120288	4.60534	0.316698	-0.759516	0.481644	-0.0232107	0.0552115	0.332712	0.968834	0.183731	0.524015	4.43622	0.340183	-0.0526913	1.16401
FBgn0033367	PPO2	5.13186	5.32809	-0.118027	-0.0722696	-0.357483	0.147766	0.0274151	0.0417258	-0.0413918	0.0563226	-0.0349051	5.60858	-915.692	5.1334	5.30576	0.199617	-0.446064	-0.0234595	-0.101366	0.027492	4.91311	-927.874	6.75463e-05	0.000823028	-0.0920965	0.0417779	5.24909	0.0631336	-0.34122	0.788273	0.00627457	0.876997	-0.00166985	0.0464688	0.319502	0.478693	5.21862	1.3081	-0.0512093	0.0462345
FBgn0033437	CG12926	5.3741	5.36451	-0.220942	0.2819	-0.537153	-0.0401473	-0.0628626	0.0448754	-0.0222003	0.0388277	-0.0134722	13.6129	-790.671	5.3513	5.35573	0.263366	0.170038	-0.12527	-0.114118	-0.0630137	12.5803	-803.322	4.37422e-05	0.000612652	0.0690985	2.07044	5.37796	0.0488545	-0.754091	0.445497	0.0203437	0.0662655	-0.0820874	0.0805692	0.174254	0.0389777	5.34937	0.0805715	-0.134956	0.0429736
FBgn0033451	CG1665	7.52614	7.62545	0.0739689	0.271587	-0.161861	-0.184497	-0.0309569	0.0370567	-0.00220837	0.0129461	0.013397	58.7628	-1063.57	7.46916	7.57653	0.315243	0.223459	-0.0804102	-0.0790187	-0.0204051	53.4293	-1075.95	5.61599e-05	0.000723822	0.207186	0.313463	7.32837	0.225118	-0.168896	0.0442192	-0.0377091	0.125514	0.00500333	0.0132876	0.229943	0.34517	7.5652	0.104299	-0.0799701	0.049072
FBgn0033473	CG12128	8.4328	8.40273	-0.0929274	-0.0597501	-0.0160859	-0.0191536	-0.0122043	0.00188951	-0.0029289	0.0119741	0.0162939	217.32	-1113.69	8.39679	8.38567	-0.0755063	-0.0831243	0.0814797	0.0700038	-0.00811102	161.206	-1129.43	2.43827e-06	6.92322e-05	-0.0816292	0.0351046	8.19776	0.423885	-0.0260171	0.0552928	-0.00544772	0.00627835	0.0339213	0.0547497	-0.104883	0.0252517	8.40297	0.0316731	0.106347	0.0536693
FBgn0033710	CG17739	7.12477	7.13769	0.055172	0.0656243	-0.242392	0.00570832	-0.00929807	0.0129804	-0.0238236	0.0258344	-0.0382874	19.6867	-1084.06	7.1003	7.07186	0.117017	-0.0170832	-0.0129581	-0.133406	-0.00867711	17.8752	-1100.53	1.21834e-06	4.18162e-05	0.0367246	0.0631018	7.10674	0.0481887	-0.142748	0.416899	0.00365781	0.0192126	-0.146487	0.385568	0.14234	0.202359	7.06135	0.0638741	0.0259225	0.140369
FBgn0033741	CG8545	9.32389	9.28236	0.0185062	0.0189839	0.00221199	-0.00269148	0.00910561	-0.0157792	-0.000868574	0.00703108	0.0111616	174.505	-1268.78	9.30762	9.2952	-0.0610257	0.00662463	0.0708182	0.0891192	0.00705442	172.714	-1282.66	1.3908e-05	0.000264697	0.0147138	0.00981865	9.30103	0.0225265	-0.00462115	0.0170375	-0.00648189	0.0362418	0.0186979	0.0199016	-0.0232032	0.0214064	9.29937	0.0178834	0.0832531	0.0175985
FBgn0033760	CG8785	5.6906	5.73753	-0.160518	0.51352	-0.516455	-0.107827	-0.0263844	0.0432056	-0.0904186	0.0268586	-0.000400925	6.32733	-924.099	5.75686	5.79858	0.206916	-0.0836777	-0.141497	-0.14638	-0.039472	6.81212	-937.348	2.50982e-05	0.000408281	0.958409	1.29565	5.7105	0.0441374	-0.136697	0.456141	0.0318455	0.119719	-0.0509478	0.106103	0.0567348	0.278393	5.81533	0.109304	-0.139557	0.0311762
FBgn0033789	CG13324	6.17838	6.28593	-0.0385808	0.45066	-0.188767	-0.122203	-0.0146725	0.0581576	-0.130689	0.0511733	0.0196284	4.51136	-1055.7	6.19021	6.24872	0.226671	-0.333118	0.14577	-0.0387388	-0.00949133	3.55009	-1068.79	2.92072e-05	0.00045688	-0.253271	0.457753	6.19484	0.0827988	-0.161075	0.095793	-0.279069	0.312885	0.0329333	0.0824453	0.499107	1.24924	6.27338	0.124555	-0.0208279	0.288836
FBgn0033799	GLaz	7.04229	6.6399	-0.346109	0.0822811	-0.125293	-0.0477452	-0.0511652	-0.0114582	-0.0570998	0.0505853	-0.00464973	14.4885	-1006.99	7.04521	6.62256	-0.416585	-0.398134	0.140342	-0.0200111	-0.0513525	11.9013	-1023.99	7.49783e-07	2.92897e-05	-0.0913784	0.261913	7.14733	1.31425	0.042339	0.183332	0.0549845	0.241856	-0.00128497	0.0444891	-0.447296	0.0481461	6.74432	0.358586	-0.0188836	0.663331
FBgn0033846	mip120	8.59045	8.58675	0.107449	-0.0374301	0.205095	-0.00219949	0.0193835	-0.0136483	0.0140558	-0.0131815	0.0140343	98.5295	-1233.65	8.56364	8.5659	0.0420806	0.0366266	0.125503	0.0867753	0.0223345	80.4215	-1246.32	4.3292e-05	0.00060908	0.250148	0.543363	8.50785	0.241778	0.0844985	0.235023	-0.00220283	0.0252653	0.137801	0.11322	0.033372	0.0377594	8.57452	0.0252921	0.0814442	0.106381
FBgn0033873	CG6337	5.5319	5.5896	-0.130108	-0.297225	-0.49596	-0.131218	0.0289831	0.0407459	-0.0178025	0.0595395	0.00393173	9.675	-930.103	5.56272	5.57627	0.25459	-0.367479	-0.202562	-0.121888	0.0337599	8.84432	-942.469	5.6983e-05	0.000731412	-0.0306637	0.248363	5.51598	0.111717	-0.284407	0.498809	-0.00102956	0.0748219	0.0381812	0.118593	-0.110014	0.222442	5.582	0.0912605	-0.0734446	0.17486
FBgn0033905	CG18324	6.56524	6.69893	-0.0747779	-0.00586762	-0.237837	0.0535908	-0.0291101	0.00981451	-0.0166201	0.0349512	-0.0220157	31.9192	-950.294	6.61709	6.65666	-0.00816291	-0.0279894	-0.0260038	-0.0460744	-0.0307758	28.5834	-963.967	1.69269e-05	0.000304424	-0.0949804	0.195596	6.64342	0.0908491	0.567568	0.952734	0.00957046	0.0349077	-0.00801949	0.0287846	-0.0130144	0.0268895	6.65614	0.0895396	0.00459607	0.0709265
FBgn0033911	VGAT	5.16651	5.17829	-0.280192	0.029851	-0.280448	0.338648	-0.00586207	0.0309598	-0.0161481	0.0172304	-0.0635571	16.9476	-792.424	5.17092	5.15786	-0.0528059	-0.115011	-0.17472	-0.153192	-0.00753178	13.5394	-807.108	6.58424e-06	0.000151211	-0.250079	0.348896	5.12707	0.110434	0.0961267	1.57164	0.00688488	0.0292249	-0.0614705	0.474607	-0.130351	0.0274077	5.16924	0.0306629	-0.161406	0.0428902
FBgn0033935	Sin1	7.68667	7.78492	0.022108	-0.0990709	0.119394	-0.094492	0.00470124	0.00773563	0.0179717	-0.00570297	0.0207751	127.962	-1066.94	7.65914	7.73771	0.0205797	0.0588489	0.0920924	0.0395186	0.00926082	98.9033	-1081.69	6.21103e-06	0.000144053	0.0109917	0.127182	7.45206	0.319702	0.104436	1.09187	-0.0612224	0.122949	0.00785245	0.0213626	0.0631865	0.0282605	7.71054	0.0750218	0.0903352	0.0507823
FBgn0033993	CG8089	6.79473	6.93003	0.121985	-0.114651	0.301716	-0.0791941	0.0103002	-0.00717263	0.0161123	-0.0358097	0.00915007	109.421	-955.378	6.78838	6.90061	0.119324	0.0673288	0.0735119	0.0366894	0.0114113	66.68	-976.639	1.29959e-08	1.04079e-06	-0.0495245	0.14075	6.97752	0.177262	0.142534	0.415462	0.00147701	0.051842	-0.00218606	0.113484	0.071778	0.0259845	6.93869	0.136056	0.0350753	0.305936
FBgn0034002	CG8079	7.19856	7.23506	0.0985856	-0.0529789	0.199373	0.0213588	0.0212423	0.00827411	0.0208896	-0.0151391	0.0137874	113.579	-1020.84	7.16056	7.24057	0.17109	0.0742366	0.0949159	0.0550124	0.0252883	90.0519	-1035.64	5.90872e-06	0.000139458	0.0795774	0.0968319	7.17733	0.104566	0.162271	0.101239	0.0156574	0.00849845	-0.0155701	0.0544626	0.137625	0.199181	7.20426	0.0628459	0.0826646	0.0367078
FBgn0034087	clu	8.87002	8.89113	0.0404575	-0.0099448	0.049916	-0.0479178	0.0102722	-0.013287	-0.00469007	-0.0116845	0.010201	145.335	-1230.24	8.85943	8.91074	-0.0286943	-0.054364	-0.0120612	0.0290541	0.00745525	122.424	-1244.04	1.49833e-05	0.000280787	0.00633687	0.0519249	8.91925	0.0540198	-0.0106972	0.177336	-0.0111333	0.00900052	0.00779368	0.159342	-0.0241157	0.0242848	8.87708	0.044402	-0.0117563	0.0648732
FBgn0034094	Tsf3	5.51261	5.11955	-0.47941	0.16367	-0.552555	0.194178	-0.028992	0.0242019	-0.0450254	0.053747	-0.0374648	23.8333	-774.755	5.39724	5.1191	-0.229206	-0.176427	-0.0891922	-0.0862485	-0.0229631	18.9135	-794.08	8.23032e-08	4.61785e-06	-0.122052	0.370815	5.21451	0.236971	-0.0994921	0.602158	0.0194637	0.0846814	-0.0240773	0.154378	-0.0840501	0.642728	5.31864	0.306908	-0.0885495	0.00939924
FBgn0034118	Nup62	8.51039	8.49837	0.0291558	-0.0168363	0.0247676	-0.0238401	0.0159679	-0.00944684	0.000722394	0.00941112	0.0151349	185.785	-1165.81	8.47501	8.4742	-0.0715359	-0.0179914	0.0972988	0.0895853	0.0183815	132.21	-1178.5	4.19758e-05	0.000597411	0.0353314	0.0690846	8.53402	0.024603	-0.0422684	0.128447	-0.00419964	0.00696071	0.0262696	0.020507	-0.0277782	0.0243725	8.49903	0.0682314	0.00641004	0.267927
FBgn0034179	CG6805	7.25174	7.39842	-0.0976499	-0.159969	-0.000727561	-0.0886588	-0.00295734	0.00809618	0.00983158	-0.0146825	0.0216914	171.238	-974.819	7.19142	7.37042	-0.0204053	-0.072955	-0.0461221	0.0836437	0.000916272	131.586	-991.011	1.59648e-06	5.03672e-05	-0.0556185	0.298818	7.27467	0.0801286	-0.0719227	0.0906739	0.00424595	0.0102119	-0.00255356	0.0542128	-0.009079	0.200103	7.41772	0.251634	0.0219464	0.0988822
FBgn0034197	Cda9	4.41016	5.05769	-0.200559	-0.343859	-0.0603535	-0.0391917	-0.0898653	0.090988	0.0906716	-0.0256664	-0.0552461	8.31582	-715.078	4.33017	4.9905	0.481108	0.269653	-0.374975	-0.465702	-0.0705366	5.69818	-727.01	8.5071e-05	0.000981669	-0.273379	0.0840786	4.83158	0.374421	-0.0848812	0.138819	0.550907	0.426332	-0.0394967	0.0234736	0.270646	0.0572838	3.94651	0.800582	-0.335615	0.105929
FBgn0034219	mthl4	5.20669	5.18359	0.064696	0.261788	0.014546	0.257305	-0.00921091	-0.030386	-0.0761476	0.00935899	-0.0549935	12.4455	-805.88	5.49484	5.33351	-0.114136	-0.196479	-0.0284888	-0.0409444	-0.0375259	12.7654	-819.486	1.8006e-05	0.000315947	0.304078	0.546629	5.17577	0.0262335	0.233501	0.188326	-0.0819291	0.0361066	0.00951094	0.0738655	-0.205544	0.0369758	5.44958	0.170504	-0.0853665	0.0703313
FBgn0034261	HPS4	7.78759	7.8651	0.0748022	-0.0691257	0.176673	-0.131495	0.0048853	0.0017402	0.00823193	-0.0249137	0.00322621	133.854	-1060.06	7.82148	7.89308	0.0847708	-0.0268841	-0.0134745	-0.129175	0.00376021	131.098	-1083.07	2.44523e-09	2.60362e-07	-0.00716239	0.139858	7.77113	0.0890995	0.294987	0.308394	0.00363574	0.0267822	-0.0242997	0.0336674	-0.0296749	0.0665885	7.85061	0.0556335	-0.0352253	0.44224
FBgn0034275	CG5002	6.78771	6.74993	-0.248736	0.177194	-0.770439	0.0239083	-0.0651865	0.0656254	-0.0328982	0.062679	-0.027745	9.65155	-1015.45	6.56544	6.62509	0.266355	-0.046324	-0.14712	-0.0446226	-0.0436371	8.15231	-1035.37	4.7062e-08	2.95954e-06	0.0640915	0.474978	6.73601	0.114006	-0.62754	0.617509	0.0608588	0.170306	-0.000639502	0.111353	0.126182	0.282063	6.61909	0.086022	-0.137345	0.602341
FBgn0034293	CG14495	4.79194	4.78344	-0.102955	0.178755	-0.639949	-0.117298	0.0136955	0.0476375	-0.0577025	0.0516935	-0.00310006	9.52212	-795.008	4.7152	4.72592	0.106887	-0.169001	-0.22854	-0.186876	0.0180226	9.0309	-811.796	9.09965e-07	3.39696e-05	0.565555	0.900118	4.77986	0.234298	-0.179869	0.695206	-0.0884166	0.507185	0.00147314	0.0786597	-0.120406	0.341587	4.72289	0.0144589	-0.175836	0.0646799
FBgn0034307	CG10914	6.89241	6.97712	0.0228515	-0.12633	0.0187226	-0.160121	-0.0092473	-0.00175054	0.0253362	-0.00619252	0.0109659	169.424	-903.275	6.87261	6.94018	0.0299372	0.0612109	-0.0575784	-0.0897043	-0.00331738	124.536	-918.654	3.42928e-06	9.20697e-05	-0.0833971	0.45266	6.82851	0.34254	-0.235035	0.154453	-0.0110741	0.0409253	0.00374838	0.0191126	0.0413083	0.0812449	6.89731	0.0776368	-0.0961776	0.0408603
FBgn0034479	CG8654	6.87453	6.54341	-0.124486	0.199368	-1.13786	0.073593	-0.0674804	0.0402682	-0.0806135	0.100676	-0.0380386	7.7509	-1007.65	6.84791	6.6143	0.0352669	-0.311007	-0.423332	-0.306272	-0.0647926	5.6208	-1027.53	4.82782e-08	3.01578e-06	-0.0087223	0.282479	7.02396	0.414124	0.452614	1.51607	-0.0650242	0.0949272	0.0962492	0.212203	-0.224017	0.302707	6.62737	0.142617	-0.309557	0.0935526
FBgn0034494	CG10444	8.44877	8.82615	-0.0134759	-0.0951391	0.269889	-0.230365	-0.022046	0.00242092	-0.012707	0.00792073	0.038566	33.1964	-1261.24	8.44771	8.76402	-0.0770489	-0.12013	0.268003	0.0666413	-0.0173861	30.9936	-1274.87	1.76425e-05	0.000311787	-0.0699185	0.0924892	8.69809	1.69333	-0.0456706	1.64179	-0.026175	0.0553092	0.028808	0.035274	-0.0410049	0.0973106	8.56052	0.19356	0.184151	0.293553
FBgn0034495	CG11788	6.92842	7.23795	0.0935389	-0.123499	0.110424	-0.379089	-0.034192	-0.00603787	-0.00999342	0.0203877	0.0421629	42.442	-1000.28	6.87234	7.15581	0.0381468	-0.210924	0.187176	-0.0559694	-0.0220221	38.1619	-1014.13	1.42699e-05	0.000269575	0.0534479	0.271912	6.9662	0.628851	-0.169452	0.786529	-0.027333	0.0535913	0.120832	0.0892403	0.0178691	0.309617	7.06328	0.548192	0.0940918	0.120119
FBgn0034583	CG10527	8.47905	8.11781	-0.148554	0.0915573	-0.335013	0.0658941	-0.0443461	0.0149341	-0.0114408	0.00373286	-0.0508266	22.5439	-1210.07	8.47169	8.16148	0.0788347	0.0649592	-0.250183	-0.246288	-0.0512184	17.7197	-1223.61	1.92335e-05	0.000335451	-0.0137793	0.420337	8.25006	2.61675	-0.0292005	0.881732	-0.00999512	0.0423239	0.0830647	0.117771	-0.0216141	0.091164	8.35471	0.509613	-0.236923	0.0483956
FBgn0034761	CG4250	6.3851	6.27718	0.107171	0.280299	-1.39599	0.367822	-0.113549	0.0675492	0.0158645	0.0985136	-0.107891	7.90441	-914.476	6.21266	6.12803	0.480219	0.347125	-0.618461	-0.286833	-0.0925181	5.97171	-939.284	4.34327e-10	5.47721e-08	0.269633	0.333345	6.32474	0.136282	0.257809	1.00488	0.0376363	0.0705174	-0.00322477	0.15612	0.556618	0.187103	6.10445	0.300498	-0.639074	0.505038
FBgn0034785	CG3649	4.34956	4.42145	-0.019064	0.0852809	-0.270545	-0.119777	-0.0595683	0.0463801	-0.0410193	0.0535912	-0.031192	10.9926	-667.665	4.25953	4.25455	0.151372	-0.0727412	0.126122	-0.148019	-0.0463763	8.0257	-682.811	4.26607e-06	0.000109043	-0.0260954	0.257973	4.05342	1.24113	-0.208037	0.0695802	0.0480423	0.0538297	-0.0470878	0.133547	0.289506	0.519783	4.27475	0.150422	0.115461	0.345161
FBgn0034788	CG13532	5.11258	5.00062	0.371706	0.531979	-0.457969	0.987141	-0.071328	0.130773	0.0199159	0.0531859	-0.0785493	3.69761	-874.729	4.8605	4.70418	0.85335	0.90543	0.00169741	0.678875	-0.0472764	3.57578	-891.36	1.05555e-06	3.81872e-05	0.439011	0.086278	5.0073	0.299077	-0.235229	1.9135	-0.116029	0.187659	0.0498257	0.314319	0.786985	1.49789	4.71708	0.156723	0.433155	0.379841
FBgn0034800	CG3788	7.08775	7.18712	-0.112262	-0.103587	0.00336211	-0.123201	-0.0178297	-0.00262125	0.000157785	0.015664	0.0136437	176.664	-914.216	7.06201	7.13034	-0.0797541	-0.113159	0.0780376	0.0101611	-0.0130565	162.824	-928.818	7.10076e-06	0.000159554	-0.112305	0.00747656	7.0643	0.433358	-0.110328	0.220776	-0.0203235	0.0534014	0.0118213	0.00943055	-0.121874	0.012042	7.08704	0.0734181	0.0738531	0.124225
FBgn0034807	CG9897	6.86106	7.1053	0.166488	0.132575	-0.264043	0.290154	-0.0132539	0.043382	-0.0114612	0.0474643	-0.0709252	10.1208	-1115.95	7.0454	7.06339	0.325033	0.233822	-0.0846753	-0.0911908	-0.016973	8.72482	-1140.05	8.5239e-10	9.86037e-08	0.130539	0.0985904	6.8592	0.160921	0.195413	0.496431	0.0420017	0.112307	-0.115591	0.128618	0.277938	0.0939755	7.01491	0.0930584	-0.106819	0.0310564
FBgn0034928	CG13562	4.86474	5.21421	-0.429395	-0.194967	0.352056	-0.0350706	0.0222203	-0.0753623	-0.0126108	0.0113874	0.0306585	24.7592	-778.678	4.97199	5.3433	-0.849257	-0.291562	0.398423	0.161109	0.007748	17.216	-799.581	1.82961e-08	1.33933e-06	-0.44889	0.115387	5.13065	0.165407	-0.0950574	0.35465	-0.059513	0.0519821	0.0790036	0.0554963	-0.79645	1.03874	5.21799	0.18649	0.261024	0.142149
FBgn0034985	CG3328	6.19346	6.21374	-0.302027	0.261937	-0.217781	0.111119	0.0238667	0.0453488	-0.0578358	0.0137855	-0.0389562	16.2028	-988.354	6.25777	6.24566	-0.0258268	-0.167614	-0.205792	-0.185232	0.0178861	13.5369	-1000.33	8.1389e-05	0.000949708	-0.024639	0.33765	6.22791	0.174738	-0.203567	0.409345	0.140244	0.138311	-0.0025267	0.0862821	0.195448	0.424563	6.24307	0.0614805	-0.201092	0.0404589
FBgn0034999	CG3394	7.89479	7.9931	0.0629552	-0.0309373	-0.460643	-0.100009	-0.0412135	0.0166361	0.0517514	0.0320589	0.012076	39.2594	-1140.67	7.76563	7.89324	0.21578	0.275927	-0.260018	-0.0500631	-0.0224188	29.2596	-1156.12	3.21262e-06	8.80183e-05	0.0202151	0.0751534	7.82457	0.255595	-0.0147785	0.587693	-0.0103653	0.0396819	0.0532796	0.0492482	0.192733	0.149434	7.82833	0.182579	-0.176463	0.21768
FBgn0035132	mthl10	6.60901	6.53513	0.0121784	0.225964	-0.144765	0.157263	0.0106924	0.00584562	-0.0432829	0.00621384	-0.0163021	36.7853	-984.319	6.63159	6.58095	-0.0320656	-0.0347015	-0.0460619	0.0580923	0.00800648	28.4334	-1000.34	1.88264e-06	5.71056e-05	0.0276534	0.271019	6.26053	0.70681	0.102373	0.453742	0.0939036	0.138596	-0.0141475	0.181688	-0.0343013	0.0580508	6.62704	0.0419308	0.126234	0.159836
FBgn0035227	Iml1	8.02262	8.02329	-0.0372443	-0.0018891	0.0424456	0.0569136	0.00810271	0.0176682	-0.0246436	-0.00308715	-0.00131576	85.0757	-1123.4	8.0336	8.02967	0.0322476	-0.1572	0.00542659	0.0262439	0.00691679	87.8563	-1138.07	6.6849e-06	0.000152403	-0.025906	0.0294942	8.02622	0.00620081	0.050364	0.0124326	0.0676611	0.0779444	-0.00868182	0.0181776	-0.172294	0.157772	8.03883	0.0450504	-0.00773246	0.0433381
FBgn0035264	Oseg4	5.27646	5.82652	0.224291	0.228598	0.088232	0.0912282	0.00990846	0.0187687	-0.0782167	-0.0284963	-0.0274566	14.7606	-887.208	5.49836	6.01895	0.209496	-0.351955	-0.262537	-0.0949741	-0.0110013	12.0354	-901.414	1.0286e-05	0.000208614	0.24481	0.105426	5.19829	4.15833	0.103641	0.0216329	0.110627	0.243485	-0.00934088	0.0588915	-0.232351	1.60509	5.90093	0.660179	-0.142546	0.127076
FBgn0035265	PIG-Wb	6.01257	6.33166	-0.406843	-0.0250085	-0.950613	-0.218402	-0.0573409	0.0862902	-0.0559752	0.0847723	0.0161955	6.96581	-949.464	5.81998	6.28239	0.342252	-0.41622	-0.27017	-0.135113	-0.0413161	6.11101	-965.371	2.08841e-06	6.173e-05	-0.267397	0.752956	6.1076	0.127004	-0.41081	0.657409	-0.0352927	0.116607	0.0183554	0.146612	0.172508	0.729317	6.00514	0.543815	-0.198289	0.0999265
FBgn0035312	CG15820	7.48878	7.20103	-0.0389494	0.00155726	-0.109463	-0.0455536	-0.00541112	-0.0606786	0.00182486	-0.0204869	0.0192503	31.991	-1083.7	7.49974	7.21046	-0.448258	0.0464455	-0.267222	0.134109	-0.0112212	23.5454	-1100.23	1.16653e-06	4.06335e-05	-0.00593882	0.0231363	7.11454	0.313718	-0.0786466	0.0404882	-0.0732389	0.117173	0.00623052	0.0337324	-0.125937	0.192084	7.4375	0.605308	-0.0673052	0.264304
FBgn0035331	MsR1	4.51715	4.47431	-0.106217	0.220803	-0.314185	0.402307	-0.0130835	-0.000882984	-0.0480815	0.0110464	-0.0635337	22.1637	-676.239	4.58433	4.57527	-0.0851134	-0.123695	-0.14636	-0.075228	-0.0262453	15.9997	-691.412	4.16068e-06	0.000107398	0.233104	0.7757	4.50882	0.117133	-0.349971	1.3166	0.00888822	0.05082	-0.203071	0.376535	-0.124098	0.0591069	4.57328	0.0842313	-0.105243	0.0299046
FBgn0035359	CG1143	6.63296	6.64405	-0.0742285	0.0984035	-0.530752	-0.00750479	-0.0131746	0.0372367	0.00621123	0.0624906	-0.0127242	14.1794	-1044.39	6.56265	6.57542	0.239285	0.239949	-0.0183842	-0.0745491	-0.00458297	11.6501	-1058.9	7.73319e-06	0.0001713	-0.0401966	0.119464	6.64718	0.0379355	-0.132983	0.367711	0.0895843	0.142229	-0.0445149	0.293467	0.294432	0.226376	6.54707	0.0693852	-0.0434552	0.0581884
FBgn0035431	CG14968	5.67346	5.5643	-0.255121	0.0668761	-0.637445	-0.0544519	-0.0304727	0.042984	-0.026636	0.0553476	-0.0201358	16.2003	-841.595	5.52018	5.44855	0.105339	-0.00646425	-0.132314	-0.087139	-0.0175318	12.9477	-856.507	5.31406e-06	0.000128332	-0.075708	0.31997	5.52916	0.191821	0.249775	1.58268	-0.000162576	0.0391803	0.0350435	0.103229	0.00409321	0.0363476	5.59504	0.189247	-0.036608	0.300561
FBgn0035667	Jon65Ai	7.5386	7.69096	-0.0747257	0.820778	-0.857777	-0.423682	-0.0968371	0.0319091	-0.0932695	0.0915804	-0.045415	2.65651	-1183.72	7.40806	7.48923	0.192212	0.128535	-0.180255	-0.521787	-0.0819908	2.27339	-1196.49	3.91642e-05	0.000569827	0.720556	0.523413	7.38454	0.304888	-0.725844	1.01977	-0.0381587	0.0556871	0.010292	0.0951712	0.115995	0.0249836	7.53541	0.37578	-0.336386	0.254988
FBgn0035673	CG6602	6.54512	6.48223	0.0947968	0.274327	-0.391473	0.348872	-0.0140941	-0.012733	-0.0278967	0.0307713	-0.0781601	18.3467	-982.166	6.64309	6.58268	0.116249	0.127254	-0.166349	-0.220634	-0.0263592	15.5788	-998.679	1.1805e-06	4.08167e-05	0.125194	0.361504	6.55457	0.104565	-0.138536	0.484691	-0.0630135	0.0943233	0.0055609	0.147637	0.115426	0.200714	6.6001	0.136408	-0.19901	0.0403084
FBgn0035678	CG10469	6.28906	6.38145	-0.204693	-0.0205261	-0.574544	0.126274	-0.0379551	0.0487386	-0.0168232	0.0319126	-0.0527741	10.8958	-958.584	6.28902	6.30249	0.0903139	-0.113444	-0.333129	-0.170398	-0.030676	9.51293	-974.68	1.7472e-06	5.42096e-05	-0.296771	0.193251	6.32707	0.0525484	-1.36149	1.17823	-0.0351594	0.0823127	0.0213476	0.0519896	-0.0461174	0.0898008	6.27061	0.0552967	-0.267662	0.148532
FBgn0035767	Cln7	6.70022	6.68923	-0.344168	0.101589	-0.446287	-0.00180109	-0.0209319	0.0657112	-0.0268354	0.0564198	-0.0264975	15.5793	-1009.16	6.56001	6.54855	0.243703	-0.0713945	-0.0774561	-0.0327114	-0.0113508	13.2923	-1035.19	1.33714e-10	2.05394e-08	-0.0704918	0.232861	6.71175	0.0531037	-0.27766	0.193463	0.0265798	0.0394486	-0.00857345	0.0690985	-0.0596355	0.2593	6.55054	0.0307159	-0.0532919	0.181342
FBgn0035780	CG18417	4.97553	4.8742	0.350849	0.175524	-0.627717	0.064025	-0.0409881	0.0586274	-0.0318075	-0.0220688	-0.0643232	9.95408	-748.72	4.98629	4.86175	0.988148	-0.0639239	-0.832254	-0.289562	-0.0418803	8.97481	-763.822	4.44833e-06	0.000112347	0.168124	0.110985	4.96743	0.126713	-0.914796	2.43299	0.0171439	0.0922641	-0.0430796	0.0454833	0.331844	1.18621	5.07462	0.366124	-0.0307538	0.814466
FBgn0035806	PGRP-SD	5.38529	5.36926	0.340886	-0.013132	-0.216045	0.223644	-0.0245276	-0.0316751	-0.113129	0.0120656	-0.0797914	6.3369	-859.241	5.48416	5.4887	0.118918	-0.721813	-0.206848	-0.320324	-0.0429452	4.87106	-872.539	2.39805e-05	0.000395593	0.309118	0.196716	5.37659	0.0441486	-0.0913533	0.761244	-0.0874989	0.0571661	0.11535	0.307117	0.0106383	0.473146	5.4769	0.0454909	-0.343446	0.212659
FBgn0035838	ldbr	7.0488	7.09073	0.0473947	-0.0150633	0.028548	-0.0779774	-0.00171076	-0.0112663	-0.00154912	0.0111765	0.0204687	191.143	-934.017	7.00937	7.06698	-0.062833	-0.0308086	0.106885	0.0361478	0.00250073	153.25	-948.403	8.69642e-06	0.000186535	-0.00241542	0.11849	7.10938	0.231295	0.194344	0.253139	-0.0087546	0.0203697	0.0118877	0.0147015	-0.0463169	0.0375555	7.03177	0.0934485	0.0686722	0.0417745
FBgn0035888	CG7120	7.03863	7.06353	0.0737436	0.0983281	0.0803712	0.0726998	-0.00899814	-0.00525794	-0.0546671	-0.00314114	-0.0312901	62.5907	-991.483	7.20328	7.18507	-0.0505617	-0.269839	-0.000333657	-0.122706	-0.0259546	48.3847	-1012.7	1.36095e-08	1.07161e-06	0.042025	0.1088	6.92187	0.349234	0.089701	0.0246659	-0.0327613	0.0247035	0.00655267	0.0524919	-0.136113	0.0852603	7.1895	0.055005	-0.0524066	0.098774
FBgn0035923	CG6511	7.6427	7.71885	0.100801	-0.0237259	0.183347	-0.0631375	0.0162489	-0.00827883	0.011351	-0.0218322	0.0123487	140.238	-1057.14	7.66098	7.74158	0.0715899	0.0680457	0.0323842	0.0451001	0.0125658	96.3959	-1076.37	8.99844e-08	4.98908e-06	0.0564318	0.0832343	7.80592	0.375734	0.0587245	0.138156	0.0459808	0.0378038	-0.0489934	0.105203	0.0691704	0.0956207	7.69502	0.0990142	0.0407521	0.0230501
FBgn0035926	CG5804	7.67768	7.84453	0.104496	0.304097	-0.457115	0.189239	-0.0239353	0.0160663	-0.0813459	0.0413637	-0.0176164	10.8397	-1225.8	7.77407	7.79267	0.184146	-0.121957	-0.0288634	0.124855	-0.0356393	7.37153	-1239.24	2.11616e-05	0.000359862	0.137786	0.263691	7.73741	0.0861638	-0.363846	0.519946	-0.0673905	0.0953393	0.00521504	0.0479819	-0.0360286	0.130187	7.79741	0.0339262	0.0469454	0.137239
FBgn0035977	PGRP-LF	4.96791	4.88328	0.0840396	0.213103	-0.361114	0.219683	0.0254941	0.0108546	-0.0396947	0.0155267	-0.0753991	15.9443	-780.933	5.10227	4.98635	0.149854	-0.0395524	-0.333468	-0.292519	0.0107273	17.348	-794.137	2.61733e-05	0.000423933	0.326304	0.615911	5.04981	0.173915	-0.209076	0.462763	-0.0161941	0.0346959	0.00974887	0.153023	-0.0108424	0.207042	5.04282	0.0897245	-0.328872	0.0380416
FBgn0036015	CG3088	7.58525	7.63546	-0.183341	0.092476	-0.181586	0.47184	-0.042164	-0.0245078	-0.0687644	0.00905003	-0.0817622	12.3006	-1147.09	7.76095	7.81316	-0.327387	-0.302304	-0.179734	-0.0486029	-0.0679527	9.51336	-1165.24	2.50367e-07	1.20925e-05	0.0695584	0.169697	7.64555	0.0493574	0.402279	0.565071	-0.0703933	0.039776	0.0166192	0.149451	-0.360791	0.132091	7.80261	0.0706333	-0.045163	0.344658
FBgn0036053	iPLA2-VIA	9.08059	9.01876	0.0550306	-0.0412151	0.120894	-0.189704	0.00196964	-0.0182569	0.00318273	-0.0102564	0.0234776	220.992	-1210.19	9.06319	9.04087	-0.0635427	-0.0362657	0.0759559	-0.0293576	0.00182253	167.356	-1242.65	2.69118e-13	9.33939e-11	-0.0169739	0.0372613	9.02083	0.0863514	-0.0492687	0.165347	-0.0738113	0.0666834	0.0148317	0.0199644	-0.0482256	0.0292498	9.19096	0.235921	0.0138358	0.0711928
FBgn0036058	CG6707	8.94895	8.83878	-0.00735245	-0.0180667	0.0130738	-0.01037	-0.00875092	-0.0139927	0.00413295	-0.0177036	0.00546755	157.832	-1193.27	8.9673	8.88088	-0.120645	-0.0203628	-0.112923	-0.00227725	-0.0119987	136.403	-1206.47	2.61961e-05	0.000423933	-0.0215692	0.0515729	8.97383	0.213591	-0.336805	1.49419	0.00204291	0.0192998	-0.0106632	0.0227662	-0.0866985	0.0968802	9.00986	0.174348	0.00207825	0.123481
FBgn0036187	RIOK1	8.01199	8.02356	0.0289769	0.00152979	0.150397	-0.0749296	0.013269	-0.0061799	0.00493769	-0.00727335	0.0266367	126.753	-1109.97	8.00952	8.03371	-0.0111675	0.0138107	0.111908	0.0828807	0.0134415	130.174	-1124.67	6.48779e-06	0.000149363	-0.0136037	0.0729727	8.01944	0.0122785	0.0664156	0.273933	-0.0122714	0.0715414	0.00680954	0.0419767	0.0195316	0.0114179	8.03263	0.0456691	0.10865	0.0653137
FBgn0036205	CG14131	6.33891	6.26845	-0.163323	0.137311	-0.35715	0.0882065	0.00838985	0.0323903	-0.041651	0.0229472	-0.0212244	16.7792	-984.833	6.38526	6.37191	-0.0207229	-0.121874	-0.193107	-0.124517	-0.00135469	12.7112	-998.561	1.60855e-05	0.000293804	0.927286	1.7053	6.29821	0.0594842	-0.0984712	0.42593	-0.0323201	0.147809	0.00399174	0.27313	-0.195976	0.388439	6.37138	0.0560551	-0.145595	0.0678406
FBgn0036331	CG14117	6.63783	6.62373	-0.108802	-0.104995	0.0526818	-0.110544	0.0051045	0.00718288	0.0344554	-0.0171674	0.0215727	57.4308	-964.66	6.566	6.58659	0.0542497	0.101968	-0.0713423	0.0179714	0.0137848	44.0695	-977.284	4.48616e-05	0.000622746	-0.120761	0.0262146	6.59865	0.226257	-0.221312	0.248423	0.0475961	0.044432	-0.0284923	0.0633288	0.130541	0.454211	6.56141	0.0848313	-0.0314686	0.0494255
FBgn0036332	CG11261	6.85641	6.98414	-0.107068	-0.0639766	0.117117	0.134233	0.0200752	-0.0088042	0.0163976	-0.0260726	-0.0181304	63.107	-1007.31	6.88882	7.06019	-0.225798	-0.0134754	-0.0589766	-0.0524537	0.0163858	50.6812	-1020.78	2.04835e-05	0.000350195	-0.0714733	0.0732681	7.00439	0.232778	0.0686292	0.146731	0.0599431	0.226047	-0.0215506	0.0121471	-0.103667	0.154601	6.96586	0.073182	-0.0608723	0.0195897
FBgn0036391	CG17364	5.2433	5.29643	0.0517602	0.423054	-0.0844537	0.390612	-0.0150313	-0.0259648	-0.0587161	0.0380578	-0.0367434	11.5417	-836.411	5.3271	5.42854	-0.254012	-0.0417276	0.134559	0.0857485	-0.0261957	10.6459	-851.541	4.33269e-06	0.00011002	0.439916	0.304442	5.27584	0.0298771	0.0980037	0.242905	-0.176186	0.28583	0.0122772	0.0912363	-0.140489	0.130539	5.38445	0.128398	0.142957	0.0961699
FBgn0036501	CG7272	6.86514	6.96325	-0.220281	0.137456	0.109705	0.0937337	-0.00281816	0.0209411	-0.00555731	-0.0423875	-0.0612218	35.9399	-1008.26	6.98033	7.08545	-0.0906107	0.0330883	-0.281368	-0.333599	-0.0150413	27.984	-1027.95	5.82491e-08	3.4764e-06	0.155714	0.805332	7.02619	0.129218	0.0911113	0.0154102	0.00346983	0.0189256	-0.0216029	0.0260489	-0.0823591	0.204901	6.93696	0.216214	-0.306429	0.0685439
FBgn0036502	CG7841	7.64135	7.61094	-0.0390264	-0.0529674	0.0573086	-0.0352167	-0.00543619	0.00696245	0.0133881	-0.0145648	0.0062623	167.302	-1012.06	7.60893	7.59222	0.0424368	0.0368249	-0.00684744	0.0200222	-0.00356072	137.68	-1026.9	5.67945e-06	0.000135759	-0.101641	0.180564	7.61406	0.0282512	-0.0480524	0.731161	0.0320364	0.0395483	-0.000240211	0.110612	0.0348172	0.0460634	7.64789	0.0507823	0.00105238	0.0127276
FBgn0036550	CG17026	5.0992	5.12655	-0.346764	0.373744	-0.525973	0.0879676	-0.0510454	0.0532881	-0.0295027	-0.000398344	-0.106812	8.22666	-769.824	5.26243	5.2225	0.287811	0.167403	-0.518444	-0.539318	-0.0775272	6.75229	-786.849	7.27902e-07	2.87782e-05	0.157146	0.773128	5.18976	0.143088	-0.133354	0.315151	0.0251552	0.173966	-0.0599144	0.0601167	0.156898	0.0301183	5.06731	0.21118	-0.574243	0.0724431
FBgn0036565	CG5235	8.19453	8.15868	0.0361842	-0.0593287	0.208049	-0.0223352	0.0100216	-0.0109499	0.010081	-0.015901	0.0185311	55.6012	-1194.93	8.19107	8.1597	-0.113904	-0.018057	0.140315	0.13266	0.00846001	50.8653	-1207.42	5.06114e-05	0.000672666	0.0332585	0.112974	8.02075	0.408443	0.114292	0.119693	0.0178637	0.019821	-0.212286	0.241482	-0.00788224	0.0665838	8.23495	0.0808458	0.145826	0.0889283
FBgn0036640	nxf2	7.60114	7.87398	-0.328952	0.00472885	0.186711	-0.058246	-0.0509344	0.0700619	0.0512036	-0.0180811	0.0741139	22.7143	-1150.83	7.38415	7.72187	0.154095	0.319291	0.0861052	0.401749	-0.0211659	15.2765	-1179.19	1.41629e-11	2.88492e-09	-0.551812	0.59102	7.56007	0.331942	0.0168383	0.168677	-0.0076269	0.107499	0.148836	0.216368	0.297028	0.216171	7.5432	0.144063	0.223728	0.219184
FBgn0036668	Zcchc7	8.62415	8.69086	0.119659	-0.0409876	0.191678	-0.0566224	0.0226384	-0.0175858	-0.00465826	-0.0132604	0.0196139	112.457	-1231.31	8.64638	8.70088	0.0472629	-0.0560828	0.0852333	0.110939	0.019793	90.2207	-1245.72	8.48091e-06	0.000184161	0.196098	0.330716	8.69872	0.114669	0.164077	0.346906	-0.0274327	0.148031	0.0163349	0.0401049	0.017204	0.120679	8.72728	0.177805	0.107369	0.0572256
FBgn0036727	CG7589	5.94784	5.93192	0.0399762	0.234964	0.0571552	0.31208	0.00345292	0.00499199	-0.0352753	-0.021371	-0.0782967	22.293	-905.107	6.12602	6.10794	0.0544448	-0.0311506	-0.0801433	-0.187682	-0.0204853	19.8404	-919.452	9.03172e-06	0.000192335	0.290129	0.28727	5.93866	0.0187422	0.609694	1.92503	0.0262851	0.171282	-0.0331915	0.0429286	-0.017764	0.104268	6.06652	0.0825311	0.0175667	0.433646
FBgn0036742	CG7497	5.14236	5.15316	-0.137321	0.35185	-0.70846	-0.000779432	-0.034437	0.032711	-0.0741798	0.052676	-0.0276095	14.9198	-773.433	5.17193	5.23651	0.120675	-0.208814	-0.318983	-0.282546	-0.0355553	10.5337	-786.388	3.29837e-05	0.000500093	-0.243912	0.39495	5.16091	0.0428278	-0.0699463	1.3	-0.13221	0.178617	0.0306987	0.132582	-0.0716729	0.138035	5.24613	0.247333	-0.296865	0.0317581
FBgn0036767	CG16775	6.63727	6.64638	-0.0361976	0.424607	-0.796373	0.0587492	-0.0185924	0.0327357	-0.110071	0.0916767	-0.0170012	4.68713	-1094.65	6.76483	6.75966	-0.0354367	-0.319053	-0.0976626	-0.0928461	-0.0315083	3.12201	-1115.86	1.35483e-08	1.07161e-06	-0.314288	0.529347	6.65548	0.0395364	-0.00784402	1.00944	-0.057446	0.126911	0.0274808	0.149739	-0.0265289	0.34656	6.78897	0.0586458	-0.0889197	0.0624548
FBgn0036773	CG13698	7.21457	7.22077	0.0456245	0.060656	0.0954744	-0.0534054	-0.00238074	0.00185347	0.00423677	-0.0193212	-0.00342229	109.635	-988.304	7.24597	7.25153	0.065055	0.0495395	-0.029182	-0.0974359	-0.00644583	83.9041	-1000.73	5.37456e-05	0.00070433	0.0607257	0.0145364	7.13457	0.105759	0.0719985	0.386817	0.00481224	0.00480278	-0.0115625	0.0265461	0.0864255	0.048043	7.26297	0.023723	-0.0520837	0.084767
FBgn0036812	Nufip	7.5921	7.63514	0.0504386	-0.0669097	0.165692	-0.0096125	0.0149178	-0.00674528	0.00734001	-0.0029019	0.0195422	111.101	-1071.87	7.56274	7.57106	-0.022607	0.0111658	0.164609	0.185207	0.0199024	106.815	-1083.91	7.66776e-05	0.000904873	0.0434334	0.60076	7.61136	0.057489	0.237062	0.237235	0.03436	0.067274	-0.00129057	0.0154981	0.000505652	0.0217611	7.55531	0.198757	0.222301	0.0678054
FBgn0036906	CG14102	6.86916	6.8734	-0.0547223	-0.268009	-0.0240162	0.120903	-0.0109179	-0.0246885	-0.000743701	0.0349385	0.0321823	40.2212	-1002.65	6.81638	6.82707	-0.203824	-0.253085	0.184194	0.345044	-0.00298179	25.2098	-1022.45	5.22667e-08	3.18551e-06	-0.183765	0.135321	6.87845	0.0837342	0.096475	0.496667	-0.0543772	0.0716442	0.0178121	0.0266714	-0.241976	0.0514705	6.80321	0.0263637	0.337445	0.114948
FBgn0037000	ZnT77C	7.52189	7.37076	-0.165215	-0.553975	-0.0610547	0.0632904	-0.00404571	-0.0356551	-0.0031923	0.0482147	0.0293488	25.1054	-1127.64	7.47372	7.2611	-0.353664	-0.552637	0.304759	0.282432	0.00563559	17.7966	-1149.36	8.42911e-09	7.52198e-07	-0.311405	0.247334	7.55912	0.296929	-0.211563	0.65077	-0.0406	0.06427	0.0482638	0.0206554	-0.599314	0.260781	7.35616	0.158616	0.281829	0.0513338
FBgn0037026	CG3634	8.01715	8.07461	0.0181912	-0.0762348	0.101548	-0.0924644	0.00728303	-0.00488759	0.0103744	-0.00725567	0.0172847	159.919	-1104.01	8.00999	8.05795	0.0325593	0.0135922	0.0385628	0.0514017	0.00903439	115.034	-1116.29	6.14498e-05	0.000774889	0.437361	0.520898	8.05011	0.0286261	0.209836	0.364347	-0.0114343	0.0655653	0.0351796	0.14759	-0.0765867	0.0601744	8.08605	0.0737463	0.0469138	0.0553752
FBgn0037065	CG12974	6.9453	6.96023	-0.121617	0.218883	-0.459905	0.163745	0.00460863	0.0208722	-0.0537052	0.0355832	-0.0466985	16.3824	-1081.95	6.97874	7.05683	-0.0824772	-0.175075	-0.17292	-0.159341	-0.00593032	12.5408	-1094.83	3.53885e-05	0.000532248	0.220152	0.449813	6.96161	0.0405368	-0.159571	0.275636	-0.028166	0.317216	0.0367507	0.0908202	-0.0298676	0.113901	7.04426	0.0719881	-0.148573	0.031048
FBgn0037076	ebd2	7.12916	7.12689	0.114966	-0.00202267	0.0701428	0.0383724	0.00309317	-0.0181699	-0.0129352	0.01317	0.0120129	97.2239	-978.055	7.12315	7.11748	-0.0275023	-0.10474	0.117394	0.101224	0.00574262	85.989	-991.934	1.39697e-05	0.000264972	-0.0509217	0.115952	7.12484	0.0153085	0.474898	3.49531	-0.0207218	0.0221881	0.0133866	0.00286144	-0.34537	0.462316	7.11948	0.0202962	0.0943617	0.0312045
FBgn0037188	CG7369	8.27255	8.33836	0.0755095	-0.0372591	0.229018	-0.0136187	0.0105929	-0.0108745	0.00785035	-0.0183146	0.00412894	154.15	-1141.39	8.28281	8.33288	-0.00128325	-0.00227753	0.125492	0.024434	0.00932944	144.84	-1154.21	3.75263e-05	0.000550269	0.102918	0.234795	8.26238	0.0990831	0.15257	0.117727	0.0174265	0.0750077	-0.053964	0.0487999	0.00463151	0.0267686	8.24941	0.0871832	0.118213	0.116923
FBgn0037225	TwdlG	4.62112	4.53377	-0.200037	-0.505766	-0.2606	-0.183058	-0.00907754	-0.0461184	-0.0430012	0.0796967	0.0408367	18.7788	-693.053	4.50892	4.46798	-0.511282	-0.747225	0.365414	0.0413121	0.00553541	13.0556	-717.805	4.58422e-10	5.57846e-08	-0.337697	0.36687	4.60195	0.112709	-0.11541	0.151631	-0.0487151	0.0109997	0.0313168	0.036299	-0.710627	0.194567	4.4849	0.0547502	0.128933	0.250662
FBgn0037379	CG10979	8.66034	8.75242	0.13163	-0.0277032	0.30679	-0.00268114	0.0197902	-0.0211997	0.00662153	-0.0157881	0.010474	91.2618	-1251.93	8.67528	8.78697	0.0460978	0.0455219	0.221551	0.066014	0.0149039	81.8162	-1268.39	1.23416e-06	4.19595e-05	0.127665	0.113323	8.71318	0.284336	0.15613	0.535851	-0.0176969	0.0217995	0.158112	1.08376	0.0200349	0.0492156	8.69337	0.0573541	0.158937	0.114631
FBgn0037408	NPFR	4.69427	4.70646	-0.00279264	-0.16955	-0.14191	0.0161411	-0.0111339	-0.0459652	-0.0576669	0.0306894	0.0116868	12.6071	-738.358	4.88708	4.81659	-0.131159	-0.540753	0.0317073	0.144202	-0.0250806	10.1505	-754.597	1.5285e-06	4.92166e-05	-0.325936	0.29659	4.76221	0.102863	0.0732134	0.190577	-0.0178521	0.0865577	0.0147536	0.0398065	-0.558412	0.151379	4.84552	0.0428289	0.117622	0.112311
FBgn0037489	CG1234	8.34975	8.43295	-0.0294074	-0.0497321	-0.0453515	-0.0380672	-0.0036651	0.00810215	-0.00220243	0.00645063	0.024909	188.036	-1126.77	8.30416	8.39622	-0.0376374	-0.0439558	-0.0217561	0.131385	0.0028886	152.692	-1139.32	4.79982e-05	0.000647113	-0.0506405	0.0440724	8.29943	0.244577	-0.0367865	0.0169128	0.00762556	0.0355651	-0.153496	0.423471	-0.00870088	0.0555865	8.3324	0.0583809	0.332767	0.406538
FBgn0037617	nom	6.29308	6.42829	0.176959	0.25334	0.271484	0.0719455	-0.00244031	0.00917374	-0.0017286	-0.0583846	-0.0403414	24.9126	-960.952	6.40365	6.53387	0.322977	0.233185	-0.104786	-0.194456	-0.017755	21.2954	-976.282	3.59235e-06	9.61724e-05	0.236215	0.187044	6.32948	0.0783052	0.29311	0.122942	0.00289266	0.040285	-0.0205948	0.0346531	0.206191	0.0703514	6.3586	0.203777	-0.221086	0.0886036
FBgn0037664	CG8420	7.98641	8.023	0.0563537	-0.125033	0.0796865	-0.195595	-0.00568343	-0.0125702	-0.00157892	0.00697132	0.0362875	86.9888	-1126.39	7.94939	7.96128	-0.0380092	-0.0598854	0.116287	0.107774	-0.00415258	63.002	-1138.95	4.79244e-05	0.000647049	-0.0440659	0.557075	8.0145	0.0285943	0.0742933	0.269822	-0.0198822	0.0346576	0.0348928	0.0261813	-0.0623111	0.0246013	7.95485	0.0185995	0.0932923	0.0284583
FBgn0037683	CG18473	6.09967	6.08625	-0.0528901	-0.0730702	-0.247481	-0.00364071	-0.0225025	0.0192545	0.00108143	0.0363759	-0.023129	25.4116	-903.308	6.03508	6.01191	0.120734	0.00193219	0.0392004	-0.0698319	-0.0146656	17.7502	-918.135	5.75699e-06	0.00013726	-0.0780484	0.0433256	6.0608	0.040356	0.0989178	0.612736	0.00585091	0.0263132	-0.0839445	0.226177	0.00646535	0.0598687	6.03614	0.0686743	-0.0453022	0.100143
FBgn0037807	CG6293	8.40469	7.94752	0.432904	0.540851	0.297138	0.312409	-0.00867257	-0.0278495	-0.045462	-0.0678849	-0.0730064	18.5454	-1254.47	8.56853	8.18601	0.23336	0.120494	-0.210082	-0.244431	-0.0341508	15.9128	-1273.68	9.21291e-08	5.07794e-06	0.481422	0.287393	8.00224	0.438175	0.301015	0.042655	0.0566915	0.129114	-0.0772279	0.0111241	0.177913	0.0621143	8.59638	0.343346	-0.23426	0.0485193
FBgn0037818	CG6465	5.68758	5.66304	0.143856	0.362954	-0.115235	0.299986	0.00304624	-0.00268562	-0.0385634	-0.00110857	-0.0641886	20.5097	-877.71	5.90392	5.87953	0.264207	0.0974709	-0.190699	-0.200348	-0.0214739	17.5618	-893.02	3.66208e-06	9.74821e-05	-0.137442	0.544206	5.63848	0.113373	0.0798593	0.211291	0.0320311	0.125338	-0.103995	0.0956149	0.077151	0.107753	5.92004	0.0397397	-0.226819	0.0379622
FBgn0037906	PGRP-LB	6.44979	6.48715	0.0605988	0.291928	-0.619639	0.127153	-0.0114889	-0.000468891	-0.0746827	0.0491211	-0.0443657	16.2439	-978.756	6.51607	6.53846	-0.0195657	-0.200399	-0.194744	-0.187992	-0.0269738	15.1208	-994.495	2.44699e-06	6.92697e-05	0.219627	0.141748	6.49715	0.0319675	-0.150566	0.635849	-0.0474126	0.0780926	0.00515323	0.0517285	0.0253302	0.253401	6.52095	0.0646403	-0.186815	0.0230215
FBgn0037918	CG6791	8.38088	8.38891	-0.0153038	-0.0876057	0.207338	-0.198099	0.0196278	0.00048913	0.0196987	-0.0142717	0.0298702	67.4431	-1224.36	8.34555	8.3185	-0.0624817	0.0827107	0.0825587	0.0173304	0.0278928	59.6969	-1238.04	1.68614e-05	0.000303829	-0.00681719	0.221279	8.5071	0.154255	0.0952696	0.209761	0.020318	0.0213189	-0.0219779	0.183263	0.0144217	0.121592	8.33103	0.0317475	0.068251	0.0409285
FBgn0037921	CG6808	6.10125	6.17843	-0.0820025	-0.0665371	0.139265	-0.0802676	0.00608769	0.0244413	0.0205685	-0.0293958	0.00103465	76.7982	-874.109	6.1111	6.2181	0.0366494	0.0746954	-0.11305	-0.0868698	0.00670684	52.648	-887.013	3.45912e-05	0.000521931	-0.0751259	0.032658	6.11962	0.0296962	-0.0537029	0.297847	0.0155304	0.0188948	-0.106738	0.104723	0.0648885	0.0139986	6.16046	0.0924415	-0.128338	0.0731236
FBgn0037949	CG17360	7.78745	7.79494	0.0903569	-0.0497627	0.169094	-0.00445029	0.00593794	-0.00798871	0.0117758	-0.0115691	0.0103348	154.868	-1067.02	7.7868	7.78703	0.0631677	0.072753	0.0946723	0.0994486	0.00620704	124.842	-1081.12	1.13269e-05	0.000223494	0.105681	0.101546	7.77373	0.146339	0.189684	0.582177	-0.00497457	0.0244315	0.00625156	0.0149867	0.0612247	0.0210192	7.78138	0.0328949	0.0920532	0.015639
FBgn0037975	CG3397	6.33689	6.31411	0.0996242	0.164955	-0.0489439	0.0314855	-0.0369992	0.0140603	-0.00202142	-0.0750777	-0.0240555	15.7267	-940.611	6.46479	6.47408	0.274181	0.120812	-0.47955	-0.112718	-0.0571161	13.7598	-958.265	4.01442e-07	1.76597e-05	0.155681	0.252932	6.34329	0.0278975	-0.0759735	0.0989714	-0.00658294	0.0230359	0.746581	0.618822	0.154828	0.0467552	6.45679	0.0516605	-0.149015	0.460792
FBgn0037979	GCC185	8.00625	8.00772	0.0884208	-0.103634	0.219469	0.0146014	0.0148625	-0.0226627	-0.000906381	0.00100815	0.0162701	92.767	-1147.76	8.00303	7.98866	-0.0221507	-0.0941624	0.176458	0.1508	0.015523	67.3012	-1161.96	1.03348e-05	0.000208701	-0.26348	0.427845	8.01686	0.0152416	-0.19495	0.517049	-0.0316008	0.0726985	0.00575978	0.146847	-0.028248	0.0412329	8.01412	0.0658673	0.183597	0.0587952
FBgn0038034	Cyp9f3	5.76832	5.99107	-0.0675074	0.0704206	-0.0707157	-0.19203	-0.04643	0.0452235	0.00609122	-0.0337703	-0.0167879	21.4685	-846.354	5.81221	6.01175	0.258582	0.203649	-0.349133	-0.286511	-0.0473239	19.989	-862.139	2.34333e-06	6.77948e-05	0.467436	0.660396	5.9385	0.285049	-0.156962	0.129849	0.0566214	0.033887	-0.0418193	0.0212248	0.170066	0.106511	5.90383	0.278924	-0.349277	0.0546693
FBgn0038173	Adgf-C	4.37162	4.32554	-0.495814	0.202276	-0.31685	0.279436	-0.0121537	0.0681906	-0.0294152	0.0222944	-0.0458668	23.7112	-654.571	4.39037	4.33205	0.0369261	-0.0306916	-0.157334	-0.147195	-0.0102349	17.8086	-672.296	3.75484e-07	1.68723e-05	-0.424616	0.35953	4.34093	0.051143	-0.00645571	1.05458	0.0639798	0.124693	-0.0212531	0.0606714	-0.0143025	0.174045	4.29712	0.272992	-0.17074	0.0688237
FBgn0038198	Npc2b	7.09441	7.09117	-0.00877382	0.123347	-0.407695	0.292471	-0.0341429	0.00858204	0.00108448	0.0586087	-0.0484214	21.715	-1055.05	7.14134	7.17894	0.11997	0.136306	-0.0665916	-0.0788346	-0.0378927	17.6324	-1075.61	2.54216e-08	1.7923e-06	0.0229491	0.0459598	7.01511	0.139132	0.142618	0.302679	-0.00222691	0.0461395	0.104273	0.154782	0.055375	0.219802	7.18358	0.0984989	-0.0735596	0.0303798
FBgn0038401	CG5916	7.9434	7.9352	0.0129973	-0.0522582	0.17167	-0.0226032	0.0091157	-0.00887948	0.0122836	-0.0157576	0.00833585	128.389	-1101.66	7.94344	7.94044	-0.0559024	0.0302781	0.0839184	0.0431453	0.00812797	116.494	-1114.21	4.82218e-05	0.000649193	0.0533516	0.128323	7.96792	0.0599934	-0.0164528	0.126723	-0.00760263	0.0344196	0.00372643	0.0397359	-0.0552389	0.0923609	7.98253	0.0582175	0.0502951	0.0379255
FBgn0038590	CG12320	6.46004	6.39589	-0.0622601	0.00585208	-0.162833	0.0263742	-0.0100484	0.00923461	-0.00685319	0.0269141	0.00278387	154.301	-843.694	6.41373	6.37265	-0.0659155	-0.0784288	0.045705	0.0177175	-0.00299313	123.248	-860.667	7.64149e-07	2.94854e-05	-0.0350636	0.0785526	6.58788	0.443284	-0.0599102	0.520951	-0.00657814	0.0387487	0.0327921	0.0642963	0.0934653	0.131362	6.40674	0.0309872	0.0442113	0.0267743
FBgn0038631	CG7695	6.4362	6.10851	0.0882477	0.106825	-0.452969	0.179721	0.00807937	-0.0444394	-0.0554411	0.0302917	-0.0539322	12.8375	-990.483	6.62015	6.18497	-0.219725	-0.190114	-0.211545	-0.19488	-0.00850469	11.0388	-1003.07	4.64099e-05	0.000635761	0.100746	0.0632846	5.95655	0.48179	-0.250207	0.352268	-0.0614022	0.0315692	0.11535	0.59472	-0.215699	0.107398	6.37006	0.219556	-0.223543	0.0751978
FBgn0038666	Smu1	7.33689	7.54744	-0.0442908	-0.121155	-0.0765366	-0.179819	-0.0111475	0.000724801	0.0222132	-0.00246586	0.0400864	167.226	-980.209	7.25215	7.49529	-0.0357654	0.0332591	-0.060101	0.0514765	1.56028e-05	102.288	-1013.38	1.33671e-13	5.00998e-11	-0.148054	0.102074	7.42126	0.119307	-0.0997756	0.0689711	-0.218224	0.337248	0.0231024	0.0673076	0.0238592	0.0314119	7.43032	0.183757	-0.101427	0.170479
FBgn0038674	CG14285	4.80837	4.70461	0.0555843	0.129771	-0.288786	0.205391	-0.0314965	0.00451839	-0.0173708	0.0338796	-0.0535246	24.9901	-691.468	4.88058	4.68108	0.158686	0.115055	-0.0872257	-0.0695296	-0.0373975	19.3287	-703.536	7.5016e-05	0.000893139	0.102075	0.103019	4.75485	0.0489345	0.205397	0.526175	-0.0515814	0.187984	0.0196044	0.0776687	0.0875457	0.037087	4.7912	0.111386	-0.072578	0.115963
FBgn0038704	CG5316	8.05084	8.06665	-0.0513774	-0.109191	-0.0839636	-0.197397	0.0174716	-0.00520468	0.0179865	0.00450231	0.0160055	114.67	-1126.44	7.97182	7.9791	-0.0614746	0.013107	0.00235602	-0.033824	0.0250862	96.2206	-1138.36	8.56502e-05	0.000987137	-0.225839	0.725782	8.05688	0.0198202	-0.142591	0.0788051	0.0429825	0.0754391	-0.00866724	0.0583852	-0.109128	0.198044	7.95275	0.0631266	-0.0276023	0.0431888
FBgn0038717	CG17751	6.12258	5.83377	-0.1023	0.684583	-0.558591	0.269491	-0.0742681	-0.0045166	-0.0775379	0.0557834	-0.0539564	5.23265	-930.252	6.24097	5.88935	-0.212703	0.165175	-0.12676	-0.122647	-0.0862031	4.46311	-942.241	8.07073e-05	0.000942927	0.673607	0.967061	6.05057	0.204809	0.259068	0.844017	-0.125219	0.12414	0.0857757	0.119	0.0442045	0.150566	5.75044	0.50588	-0.106862	0.140692
FBgn0038721	subdued	7.75086	7.72322	0.0603907	0.033454	0.224654	-0.00505353	0.021857	-0.0228923	-0.00169266	-0.0281093	0.00905324	114.234	-1094.78	7.81399	7.78703	-0.110707	0.0215222	0.0295133	0.0459096	0.0123492	76.9354	-1116.75	6.56272e-09	6.05041e-07	0.0548713	0.0425453	7.73272	0.0319335	0.296957	0.262464	-0.0193797	0.191768	0.0434565	0.112272	-0.0431648	0.114551	7.79382	0.0219194	0.0693461	0.107136
FBgn0038740	CG4562	7.27026	7.33583	-0.0863107	0.258159	-0.034136	0.0478056	-0.011754	0.0175339	-0.0507425	0.0123215	-0.0458717	12.6625	-1139.38	7.28203	7.2521	0.0159492	0.00720083	0.0252292	-0.17295	-0.0150026	11.3249	-1152.22	3.68654e-05	0.000542991	-0.0305997	0.268686	7.22395	0.0741974	0.527006	0.773791	0.00743116	0.0397476	-0.0170619	0.0688649	0.025689	0.116701	7.27483	0.0522669	-0.148476	0.457999
FBgn0038845	CG10827	6.79826	6.7785	-0.134204	0.0801541	-0.13028	0.0961362	-0.0279617	0.0575519	-0.0295634	0.0210154	-0.0368092	7.52771	-1081.06	6.86007	6.6821	0.285886	0.0224207	-0.120213	-0.138909	-0.0206988	7.11728	-1094.06	3.15266e-05	0.000483476	0.0852379	0.220656	6.71353	0.122547	-0.0410649	0.174245	0.101173	0.199251	-0.0170491	0.0732616	-0.107835	1.47136	6.72503	0.24807	-0.116344	0.068348
FBgn0038846	CG5697	5.47765	5.26955	0.110457	0.155714	-0.258284	0.344958	0.0191537	-0.00440243	0.0129528	0.0300574	-0.0880827	15.8008	-871.098	5.68188	5.3481	0.145328	0.191483	-0.207064	-0.221806	0.00534765	11.236	-885.333	1.00176e-05	0.000206297	0.0376299	0.0783732	5.29432	0.214173	0.0436967	1.23689	0.0603899	0.0582202	-0.0949866	0.132137	0.0171612	0.17735	5.48944	0.164096	-0.21902	0.0479152
FBgn0038870	Oga	7.93982	7.93088	0.0611847	0.0779123	-0.0900606	0.0417769	-0.00260705	-0.0166074	-0.0273229	0.01409	-0.00575568	68.3401	-1123.13	7.99909	7.96065	-0.0566282	-0.155618	0.00186099	0.0505096	-0.00888705	62.8055	-1137.01	1.3927e-05	0.000264697	0.072884	0.0225986	7.87637	0.067218	0.0146763	0.187641	-0.0326399	0.0246217	0.00910356	0.0606938	-0.0715786	0.126206	7.98072	0.13017	0.0282207	0.0343285
FBgn0038973	Pebp1	7.96431	8.08613	-0.0660971	0.825894	-0.733272	0.362732	-0.0437252	0.0492605	-0.146961	0.0620732	-0.0652566	3.53506	-1311.4	8.16426	8.16067	0.174029	-0.0359107	-0.411506	-0.0322014	-0.0486303	2.86347	-1327.99	1.10635e-06	3.94162e-05	-0.55305	1.62712	7.49749	0.724583	0.455043	0.963341	-0.110096	0.108337	0.0376564	0.10633	0.472628	1.21173	8.1589	0.0162383	-0.192514	0.412113
FBgn0038981	CG5346	6.81989	6.82104	-0.0451209	0.148049	-0.139035	0.115414	-0.0120129	0.0201597	-0.0282665	0.0154249	-0.042026	33.6038	-994.987	6.87686	6.80559	0.13979	-0.0359776	-0.102518	-0.139768	-0.0124069	25.4481	-1007.27	6.1528e-05	0.000774889	-0.0732219	0.213756	6.81225	0.169132	0.0594803	0.21967	-0.00718075	0.0452929	0.0782932	0.173345	0.0447436	0.142082	6.87566	0.0851006	-0.136515	0.0523574
FBgn0039015	Takl2	4.26676	4.26888	-0.147908	0.158499	-0.534028	-0.071123	-0.00701956	0.0257328	-0.0628897	0.0403516	-0.0172179	13.3754	-669.552	4.28784	4.33375	-0.194932	-0.195284	-0.165895	-0.203717	-0.0177034	10.1232	-684.009	8.14339e-06	0.000179116	0.314087	0.93865	4.18649	0.136774	-0.414511	0.246263	0.118217	0.306442	-0.00101072	0.0605214	-0.0391053	0.218563	4.30124	0.0515995	-0.160746	0.0796735
FBgn0039022	CG4725	5.23424	5.16834	-0.201032	0.154987	-0.271915	0.174934	0.00421594	0.0569463	-0.0573836	0.0223143	-0.0394768	17.473	-819.998	5.20305	5.20316	0.225893	-0.241036	-0.0853871	-0.096829	0.00147499	10.9109	-837.721	3.76341e-07	1.68723e-05	0.0412792	0.361924	5.21233	0.086776	-0.313627	1.71699	0.00514707	0.0502289	-0.0333946	0.112406	0.178654	1.02485	5.20298	0.0256369	-0.0753106	0.0393332
FBgn0039081	Irk2	7.2936	7.28209	-0.153047	0.0491358	-0.235101	0.126732	-0.0103679	0.0186274	0.00198628	0.0275952	-0.0319138	24.5666	-1095.78	7.21752	7.20071	0.0509297	0.0786387	-0.0319647	-0.047669	-0.0016324	22.208	-1110.5	6.35236e-06	0.000146967	-0.0157686	0.16175	7.24128	0.0470122	-0.0927451	0.127126	0.0248461	0.0244253	-0.00671494	0.0324133	-0.00312916	0.181593	7.19758	0.0460848	-0.0687874	0.0450322
FBgn0039141	spas	8.56556	8.60518	0.0900234	-0.00362346	0.110478	-0.0134521	0.00567254	-0.0105933	0.00153514	-0.00713074	0.0130971	205.597	-1161.25	8.59598	8.621	-0.0460127	0.00406926	0.0253709	0.0917573	0.00421694	166.115	-1173.31	7.57192e-05	0.000896951	0.0578663	0.182893	8.62721	0.103505	0.115988	0.672738	-0.00773131	0.0258266	0.0182716	0.0850924	-4.10993e-05	0.0290955	8.62088	0.0342685	0.0641611	0.117722
FBgn0039183	Dis3	8.45437	8.4666	0.00470211	-0.00486062	-0.0247966	-0.0714254	-0.0111614	-0.00503064	-0.00350188	0.00373393	0.0179428	207.271	-1101.9	8.43521	8.45626	-0.0443034	-0.0083592	0.0330038	0.050843	-0.0108985	237.179	-1114.42	4.90988e-05	0.000658163	-0.00847332	0.0507055	8.42343	0.0337773	-0.0258036	0.296518	0.00307236	0.026707	-0.0055896	0.0375103	-0.0163441	0.0274013	8.45691	0.0214084	-0.000846294	0.100688
FBgn0039234	Nct	8.68716	8.614	0.0679338	0.0465655	0.161276	0.0713362	0.0134288	-0.0145243	0.00548695	-0.0177918	0.00165367	118.718	-1220.27	8.68751	8.64347	-0.0100301	0.0770035	0.0586943	0.105673	0.0094262	106.265	-1232.93	4.32921e-05	0.00060908	0.0422256	0.0357102	8.56227	0.4881	-0.0115628	0.262056	-0.0343525	0.0684452	0.00514701	0.0163539	0.06947	0.0795301	8.70239	0.0535232	0.0756633	0.0448061
FBgn0039311	CG10513	6.78965	6.71865	-0.458577	0.384242	-0.915099	-0.262844	-0.0590792	0.0662164	-0.0415294	0.0738496	-0.000468278	5.14481	-1063.37	6.66076	6.60507	0.134357	0.0162668	-0.280794	-0.289253	-0.0382062	4.18672	-1075.62	6.31455e-05	0.000786874	0.173424	1.09212	6.69436	0.138745	-0.74269	0.266211	-0.00562591	0.115828	0.0898384	0.206287	0.0556336	0.0246558	6.43274	0.294204	-0.290471	0.0149403
FBgn0039564	CG5527	5.17304	5.07524	-0.132522	0.235716	-0.280703	0.170072	-0.0035005	0.0467229	-0.0405344	0.0313951	-0.0302604	25.1912	-777.097	5.15436	5.06287	0.198936	-0.103476	-0.00261354	0.0134692	0.00024906	19.7982	-796.056	1.1651e-07	6.23828e-06	-0.291748	0.556686	5.10161	0.0980525	-0.00948137	0.359047	0.043596	0.0619388	-0.0935279	0.0800489	-0.272063	0.716908	5.18003	0.240201	0.0212034	0.0603632
FBgn0039609	CG14529	4.50448	4.19771	-0.166978	0.141941	-0.449645	0.113802	-0.000655236	0.0160441	-0.0626213	0.0590226	0.00525662	9.33629	-718.825	4.43112	4.25171	-0.0575593	-0.37655	-0.0945723	-0.0960072	0.006758	7.35726	-733.13	9.38114e-06	0.00019681	0.210764	0.608485	4.10546	0.595783	0.177605	0.823542	-0.0435209	0.12295	0.03588	0.0829317	-0.0181641	0.281265	4.41993	0.0957252	-0.0749156	0.0541295
FBgn0039612	CG14523	4.94213	5.16911	-0.356923	-0.0131074	-0.280154	0.109834	-0.0676955	0.122751	-0.032154	0.0490732	-0.00524928	10.3736	-767.32	4.6499	4.82883	0.501674	-0.26394	0.0152669	0.043506	-0.0228923	7.31887	-792.973	1.9277e-10	2.77886e-08	-0.0019386	0.271872	4.57197	0.974718	0.0362026	0.274982	-0.0112791	0.16059	0.0259744	0.0467104	-0.00499406	0.366394	4.73239	0.107143	0.0397817	0.0448069
FBgn0039634	alpha-Man-Ib	8.5523	8.57111	0.0939709	0.000849022	0.261088	0.0070134	0.0122709	-0.000656004	0.0104116	-0.0193767	0.0152488	132.763	-1198.01	8.53437	8.5477	0.0895591	0.0819621	0.164209	0.163178	0.0135709	82.8502	-1218.09	4.01323e-08	2.59337e-06	0.017088	0.0671655	8.56506	0.0323015	0.236574	0.249472	-0.00503986	0.0286923	0.0975394	0.337065	0.0783067	0.0149554	8.55349	0.0410115	0.164408	0.00896133
FBgn0039703	CG7829	5.56543	5.75223	-0.00281831	0.0840496	-0.340717	0.45485	-0.0186547	-0.0337281	-0.0965083	0.0111558	-0.102615	11.3562	-863.657	5.90467	5.98406	-0.446117	-0.511581	-0.165486	-0.252201	-0.0604914	8.44127	-885.571	6.96476e-09	6.3359e-07	0.0479988	0.0665011	5.44077	0.205492	0.0129679	0.381746	0.0366813	0.109604	-0.158117	0.210784	-0.427066	0.0605882	5.89371	0.163732	-0.267568	0.109168
FBgn0039828	CG1542	8.62796	8.6417	-0.0792421	-0.0789758	-0.0694994	-0.073926	-0.00546045	0.00683679	-0.00292947	-0.000455633	0.0151862	220.033	-1135.97	8.6215	8.62053	-0.017632	-0.0995555	-0.0835592	0.0471295	-0.00397731	193.496	-1148.59	4.50395e-05	0.000623368	-0.221197	0.323311	8.63952	0.0106057	-0.0673767	0.0207341	-0.000925429	0.0195745	0.053515	0.148961	-0.0659542	0.0865824	8.61842	0.0389834	-0.00115186	0.0599714
FBgn0039886	CG2003	6.50539	6.56821	-0.195202	-0.0253248	-0.215283	-0.0118069	-0.0275846	0.0343189	0.00530697	-0.0365804	-0.00916129	57.4664	-885.829	6.47174	6.53515	0.102988	0.086791	-0.426667	-0.0219765	-0.0275055	40.2287	-910.206	6.57415e-10	7.69998e-08	-0.180776	0.171893	6.51374	0.0443247	0.16971	0.366625	0.0147141	0.0441084	-0.0139601	0.0441944	0.0823853	0.0416347	6.53327	0.045885	-0.340365	0.333182
FBgn0039932	fuss	6.05674	6.15269	-0.0102969	-0.266004	-0.192049	-0.161543	-0.00222586	-0.0271423	-0.052533	0.0517305	0.00827618	19.7759	-919.475	6.12582	6.09652	-0.192493	-0.520668	0.123407	0.0525581	-0.00380888	13.0955	-942.34	2.804e-09	2.91928e-07	-0.424942	1.41076	6.03137	0.135981	-0.17536	0.0569952	-0.0563021	0.0450876	0.050105	0.0806198	-0.2923	0.209172	6.05373	0.0855231	0.0836821	0.100914
FBgn0039944	CG17162	3.96365	3.86717	0.163638	0.0901002	0.510709	-0.148658	0.0700455	-0.0200773	0.00259561	-0.0561698	0.0335948	24.9069	-691.621	3.96058	3.94812	0.0255177	0.0647114	0.126302	0.073795	0.0665546	16.5494	-709.546	3.10668e-07	1.45548e-05	0.0745914	0.0949348	3.88152	0.057551	-0.343085	1.00834	-0.0175428	0.0636223	0.144434	0.19475	0.0332737	0.0228171	4.00013	0.12872	0.109567	0.0304275
FBgn0040089	meso18E	6.2525	5.94746	0.203682	0.196071	-0.0174528	0.0103117	0.0189653	0.0242959	-0.023044	-0.0344063	0.0242442	22.6804	-964.231	6.20007	5.94753	0.361995	0.0718093	-0.227764	0.189933	0.0197341	18.5233	-979.221	4.94036e-06	0.000121819	0.215505	0.0823641	6.16941	2.01147	-0.00414964	0.0269514	-0.120147	0.168082	0.0748852	0.0695781	0.392384	0.867133	5.99788	0.185836	-0.246553	0.609675
FBgn0040257	Ugt86Dc	5.75719	5.46473	0.198316	0.172599	-0.569705	-0.114784	-0.0059407	-0.0473239	-0.0750022	0.0567283	-0.0131596	9.44769	-881.047	5.86905	5.52632	-0.302068	-0.338781	-0.0356978	-0.181376	-0.0218711	8.93006	-893.757	4.139e-05	0.000591195	0.210708	0.0205655	5.5679	0.386701	-0.262292	0.476077	-0.0905295	0.0503569	0.00503185	0.110706	-0.368515	0.133344	5.35589	0.647557	-0.105739	0.0885128
FBgn0040268	Top3alpha	8.44886	8.50992	0.049253	-0.0138828	0.170514	-0.0760602	-0.00236977	-0.00452574	0.00534081	-0.013599	0.0158265	172.292	-1147.96	8.43303	8.51863	0.0695262	0.00200566	0.0703305	0.00974315	-0.000359916	146.004	-1160.13	6.83721e-05	0.00083093	0.0448764	0.0671004	8.47852	0.0564964	-0.114492	0.458467	0.0173358	0.0205627	-0.00235703	0.0461021	-0.00617007	0.0214143	8.4922	0.0692599	0.0346476	0.0557307
FBgn0040271	Sulf1	7.7572	7.81255	0.0386077	-0.0610417	0.087829	-0.00987806	0.0153116	-0.00137304	0.0167658	-0.0101337	0.0179373	168.019	-1066.19	7.7428	7.80793	0.0273077	0.0182223	-0.0111982	0.0677277	0.0205214	174.015	-1079.46	2.45763e-05	0.000402588	0.0625498	0.0912672	7.77013	0.0778569	0.361497	0.537377	0.00259949	0.0103161	-0.00621134	0.0442325	0.0207074	0.015004	7.76337	0.0520664	0.148733	0.137634
FBgn0040294	POSH	8.57225	8.58413	0.0166597	-0.0246788	0.221007	-0.0988984	0.0163022	-0.00697466	0.00952995	-0.0148015	0.0276784	61.3012	-1253.15	8.57381	8.57128	0.0479802	0.0011409	0.108955	0.107444	0.0187943	67.3573	-1267.15	1.24731e-05	0.000242979	-0.0273718	0.0727642	8.58153	0.026769	0.0293268	0.539808	0.0622211	0.3066	-0.00458218	0.157763	0.0509419	0.0747696	8.58411	0.0162306	0.10809	0.0252094
FBgn0040342	CG3706	5.75724	6.4591	-0.00967459	-0.124197	-0.574649	-0.575802	-0.119769	-0.0199339	-0.0272095	0.117187	0.0744241	6.97537	-877.435	5.58026	6.28664	-0.222841	-0.285978	0.25948	0.00901441	-0.0995557	6.00269	-897.875	2.84599e-08	1.94649e-06	-0.0476413	0.0533612	5.40413	1.20871	-0.626826	0.261158	-0.0195042	0.0183616	0.047567	0.0506844	-0.161733	0.402725	5.54978	1.71148	0.0215072	0.480025
FBgn0040372	G9a	9.42265	9.40199	0.0967869	-0.0517698	0.22292	0.0563244	0.0192339	-0.0110639	0.0157524	-0.0136578	0.00319311	100.487	-1358.2	9.42333	9.4361	0.00521258	0.0468837	0.155354	0.0674511	0.0177866	87.5979	-1370.53	5.89537e-05	0.000754639	-0.0809283	0.219035	9.42969	0.0450599	0.153909	0.119395	-0.00112351	0.0428221	0.0171368	0.151122	-0.217845	0.435716	9.41796	0.0241095	0.115643	0.0479808
FBgn0040397	CG3655	8.12555	8.47829	0.132827	-0.178967	0.117248	-0.251997	0.00559126	-0.00675545	0.0284808	0.00564746	0.0349891	90.2956	-1185.48	8.06252	8.40874	0.0744872	0.0114116	0.161955	0.0567154	0.0150367	73.8194	-1206.68	1.38643e-08	1.07362e-06	-0.205222	0.209625	8.30174	0.214035	0.0546902	0.250862	0.0170934	0.0474018	-0.118993	0.240127	0.0774134	0.13404	8.31358	0.131997	0.116105	0.0441373
FBgn0040759	CG13177	4.82335	4.5218	-0.39288	0.538964	-0.368028	0.346298	0.0500155	0.074189	-0.0499629	0.0282064	-0.0321503	6.25328	-861.054	4.77247	4.71399	0.0893089	0.152021	-0.188682	0.00838062	0.0531245	5.91409	-874.552	1.99149e-05	0.000343651	-0.23523	0.586264	4.63875	0.180454	-0.364283	0.688609	-0.0257286	0.160241	0.045238	0.11087	0.212766	0.0970334	4.78447	0.0846831	0.051821	0.650182
FBgn0040827	CG13315	9.11733	9.02996	-0.0075596	0.111162	-0.452445	0.353024	-0.0139464	-0.00417963	-0.0397807	0.0205484	-0.065101	19.3619	-1376.97	9.25096	9.13222	-0.0284752	-0.127842	-0.323963	-0.188854	-0.0261883	16.4628	-1390.26	2.41499e-05	0.000396618	-0.0419956	0.131575	9.35714	0.289151	-0.289146	0.647292	-0.0352621	0.0296403	0.548426	0.640234	-0.109828	0.0367206	9.25498	0.148863	-0.200441	0.443874
FBgn0040958	Peritrophin-15b	4.74224	4.72801	-0.0609214	0.0272924	-0.336401	-0.210992	-0.0447886	-0.0516119	-0.0876524	0.048939	3.48344e-05	4.75458	-756.285	4.82023	4.76113	-0.585493	-0.410601	-0.0154924	-0.154191	-0.0531949	3.85151	-768.527	6.38535e-05	0.00079246	-0.0697406	0.559423	4.73735	0.0735475	-0.212222	0.0808486	-0.128139	0.0631049	0.000526983	0.0615131	-0.412687	0.0381025	4.86264	0.0986805	-0.139259	0.281136
FBgn0041203		8.17033	8.14846	0.0501254	-0.00128651	0.149868	0.000300702	0.0135798	-0.015584	0.000905123	-0.0159322	0.00185404	203.128	-1107.79	8.18602	8.18332	-0.0768112	-0.0214676	0.0432481	-0.0248213	0.010832	155.214	-1121.11	2.36667e-05	0.000391796	0.0306353	0.0714831	8.14426	0.0270695	0.554567	1.43889	0.0169644	0.0392396	-0.0133693	0.0463138	-0.0293813	0.0306305	8.18633	0.0400439	-0.0294984	0.0416923
FBgn0042174		8.87671	9.36903	0.22845	-0.285982	0.0610385	-0.408085	-0.0329798	0.0218949	-0.0527752	0.0425367	0.0505509	27.2621	-1355.5	8.90386	9.29716	0.353122	-0.611545	0.186999	-0.0663508	-0.0198254	17.3198	-1383.48	2.03347e-11	3.96951e-09	0.13792	0.846791	8.69355	0.914379	-0.202377	0.33762	-0.00608292	0.0465264	0.0266893	0.0301427	-0.177614	0.559865	8.8932	0.422046	0.0314797	0.681781
FBgn0043362	bchs	6.39704	6.28518	-0.0291672	0.0300345	0.111436	0.176243	0.0193902	0.000320367	-0.00378868	-0.0240844	-0.031969	100.683	-880.325	6.47663	6.35695	0.00522929	0.0248448	-0.0617313	-0.0562923	0.00816246	78.2675	-895.734	3.33532e-06	9.03234e-05	0.179004	0.661802	6.29801	0.0864372	0.158279	0.0470165	0.0110671	0.0168548	-0.17854	0.377847	-0.0387383	0.0881533	6.42619	0.0738933	-0.0406832	0.038315
FBgn0043470	lambdaTry	6.63373	6.89877	-0.0541426	-0.0041978	-0.440285	-0.0114267	-0.0330037	0.0513364	-0.0583253	0.056491	-0.0107514	8.42145	-1066.56	6.71027	6.78541	0.116745	-0.187161	0.00697164	0.0500231	-0.0329632	7.71866	-1082.95	1.32099e-06	4.37373e-05	-0.130306	0.113979	6.5085	0.403266	-0.0879067	0.542779	-0.049489	0.109759	0.00547206	0.0546428	0.127624	0.514555	6.75274	0.0540135	0.00575222	0.0626635
FBgn0043471	kappaTry	6.45786	6.60237	-0.188474	0.377716	-0.576323	0.181723	-0.0182153	0.0644801	-0.0759265	0.0696535	-0.0239498	9.79031	-1046.27	6.43647	6.53729	0.166026	-0.0549378	-0.0800658	-0.0591853	-0.0090256	7.12141	-1062.65	1.34249e-06	4.42928e-05	0.0597858	0.632467	6.56225	0.0494465	-0.487983	0.632643	-0.0790112	0.261935	0.085904	0.0549422	0.339702	0.528141	6.54496	0.432723	-0.0707332	0.0544342
FBgn0050151	CG30151	6.23374	6.08809	-0.164798	0.143279	-0.310254	0.144359	0.0179808	0.034633	-0.0149498	0.00556341	-0.0468187	19.0968	-962.892	6.29699	6.16601	0.00931701	-0.043854	-0.263614	-0.220036	0.0129169	15.114	-977.129	9.99384e-06	0.000206261	-0.0333434	0.282523	6.16901	0.0630794	-0.257222	1.15757	-0.00312944	0.05201	0.00592797	0.0647713	-0.00731897	0.310141	6.24473	0.0850638	-0.224986	0.0489307
FBgn0050197	CG30197	7.19896	7.17485	-0.213257	-0.105996	-0.65977	0.0323897	-0.0139572	0.0136894	-0.0131909	0.0620967	-0.0298501	21.9429	-1063.35	7.18917	7.1099	-0.144306	-0.0948929	-0.143386	-0.114272	-0.0115688	18.5532	-1079.39	1.85168e-06	5.65154e-05	-0.0608739	0.662066	7.18484	0.0206085	-0.0169105	0.485769	-0.0139751	0.0312053	0.0531267	0.142559	-0.118698	0.0593203	7.14605	0.0485014	-0.123279	0.0273708
FBgn0050281	CG30281	4.75449	4.34948	-0.244828	0.145336	-0.188969	0.583642	-0.00489861	-0.0253663	-0.0990606	0.00971408	-0.0921049	8.27155	-731.406	4.94259	4.46515	-0.486015	-0.516282	0.00761104	-0.0457296	-0.0294108	7.86528	-745.926	7.6723e-06	0.000170354	0.0681999	0.41343	4.55081	0.187	-0.0947602	0.633185	-0.0472006	0.0430983	0.00460311	0.0950966	-0.479217	0.147197	4.59545	0.481267	-0.0334815	0.0614094
FBgn0050371	CG30371	6.71276	6.96153	-0.0200874	0.129437	-0.317378	0.104532	0.00795824	0.0225711	-0.0428902	0.034212	-0.0655824	16.8278	-1070.03	6.75518	6.86974	0.26568	-0.0229725	-0.110791	-0.197336	0.00710337	11.4358	-1088.66	1.58189e-07	8.14412e-06	0.0540586	0.3216	6.85646	0.0859312	0.0221334	0.220096	-0.025671	0.326535	0.0381724	0.0797054	0.0552926	0.135715	6.82799	0.0920193	-0.1366	0.0932709
FBgn0050428	CG30428	5.3975	5.09928	0.683055	0.271547	-0.656119	-0.124707	-0.0254071	0.0121603	0.0485042	-0.0434726	-0.150997	4.7438	-873.056	5.57963	5.33306	0.663836	0.521788	-0.898808	-0.938988	-0.051308	2.89109	-896	2.59786e-09	2.73505e-07	0.796696	0.448659	5.47238	0.439273	-0.307981	1.49932	0.0345996	0.0371413	-0.0486753	0.147599	0.387551	0.297569	5.61135	0.235586	-0.912651	0.079124
FBgn0051004	mesh	7.69236	7.68296	-0.00252526	0.401424	-0.0646939	-0.059068	0.0323539	0.0362867	-0.0769937	0.00623139	-0.0140737	9.62744	-1274.59	7.80131	7.73486	0.188437	-0.129629	-0.136086	-0.106028	0.0253542	7.6547	-1286.88	6.12643e-05	0.000774692	-0.772674	0.790831	7.68382	0.0209975	-0.0908344	0.0674053	0.427382	0.589902	-0.0500058	0.217864	-0.00732976	0.299239	7.76508	0.200219	-0.216738	0.167396
FBgn0051207	CG31207	5.37176	5.24316	-0.104468	0.235278	-0.287154	0.308906	-0.0261897	0.000503085	-0.0603017	0.0205755	-0.0782795	11.1041	-814.739	5.5262	5.3909	-0.252581	-0.12201	-0.250502	-0.140143	-0.0461129	10.3001	-828.942	1.03211e-05	0.000208701	0.100325	1.41736	5.33675	0.0960848	0.489909	0.822044	-0.0627329	0.0342386	0.068062	0.184472	-0.15723	0.099632	5.41159	0.182395	-0.272997	0.146841
FBgn0051547	NKCC	7.17349	7.1846	-0.242893	0.364838	-0.492771	0.212521	-0.00886181	0.0418242	-0.0549974	0.0332119	-0.0566646	11.6457	-1124.1	7.20282	7.1986	-0.0812722	0.0278675	-0.179156	-0.0426029	-0.0189672	9.66968	-1139.3	4.04957e-06	0.00010599	-0.123916	0.454683	6.77262	0.560565	-0.172966	0.44003	0.0392482	0.134009	-0.00522832	0.0791981	0.0060706	0.0285638	7.21679	0.0240008	-0.0631282	0.1034
FBgn0051664	CG31664	4.19925	4.67292	0.0650474	0.0389501	-0.215451	0.214269	-0.0102111	0.0972989	0.0395304	-0.025017	-0.0874818	5.89535	-773.976	4.32903	4.79176	0.590609	0.232527	-0.368922	-0.432812	-0.0174002	4.47744	-785.882	8.70843e-05	0.000996312	0.0410658	0.128384	4.62428	0.567197	0.128053	0.375513	0.0591771	0.104284	-0.0538538	0.242855	0.161275	0.298156	4.50523	0.333932	-0.369645	0.0891803
FBgn0051676	CG31676	6.00487	5.98836	-0.157788	0.0299967	-0.251413	0.153714	0.00484068	0.01014	-0.0190429	0.00506111	-0.0457921	25.8375	-905.165	6.11046	6.04323	-0.1666	-0.0524842	-0.122464	-0.0844087	-0.0110223	20.3383	-917.307	7.00657e-05	0.000844937	0.043957	0.825419	6.00363	0.023509	-0.22134	1.51385	-0.00188426	0.0127436	0.00663098	0.0318235	-0.0961415	0.0886979	6.0144	0.129736	-0.117975	0.0531138
FBgn0051739	AspRS-m	8.9193	8.93438	0.0380035	-0.0385527	0.177604	-0.0728215	0.00541335	-0.00476675	0.0121163	-0.0164794	0.018024	146.814	-1228.95	8.88493	8.93042	0.0481754	0.046663	0.0657191	0.0265231	0.00750968	122.693	-1244.7	2.42895e-06	6.9177e-05	-0.015849	0.189611	8.95405	0.0438237	0.0386599	0.172675	0.00858935	0.0118503	-0.0551406	0.16928	0.0442819	0.0144964	8.85517	0.1001	0.0468982	0.0579609
FBgn0051777	CG31777	5.0966	5.02523	-0.0777689	0.021824	-0.373699	0.0950327	-0.00498259	0.0544317	-0.0175717	0.0392052	-0.019978	21.6984	-769.72	4.99053	4.9007	0.275246	-0.087809	-0.0911116	-0.0487057	0.00772007	16.0552	-786.56	8.66859e-07	3.26204e-05	-0.0711601	0.0836685	5.07208	0.117549	-0.583666	1.10078	-0.0462498	0.0753802	0.104162	0.207843	0.0658787	0.415035	4.80215	0.135668	-0.0940768	0.0510327
FBgn0051915	CG31915	7.31885	7.32058	0.0355517	-0.0150164	0.078406	0.0315409	0.00944553	-0.00628455	0.0128739	-0.0105674	0.000558363	227.762	-961.825	7.33458	7.34844	-0.0134037	0.042098	-0.00507422	-0.00118047	0.00990402	185.179	-975.548	1.61426e-05	0.000294272	-0.444472	0.781526	7.31559	0.0140201	0.0829541	0.0430953	0.0143825	0.0371278	-0.0310081	0.0327838	0.0284473	0.0566864	7.30381	0.0456002	-0.00652121	0.0214048
FBgn0051935	CG31935	7.47381	7.63652	-0.00703814	-0.100795	0.172953	-0.124466	0.000357475	0.0027639	0.0100129	-0.00760225	0.0152444	270.279	-972.895	7.4644	7.61743	0.00946352	-0.0316696	0.102289	0.00919679	0.00201449	241.292	-987.893	4.90492e-06	0.000121264	0.0541298	0.214602	7.65277	0.209013	0.186674	0.153466	-0.0160749	0.0474592	0.0364481	0.0450247	-0.00459076	0.0191912	7.58262	0.094324	0.102474	0.441639
FBgn0052054	CG32054	5.35396	5.39493	0.411805	0.41724	0.122431	0.149744	0.0541389	0.00495712	-0.0764285	0.0533192	-0.0259605	9.35892	-965.379	5.41347	5.411	0.324222	-0.0319725	0.387551	-0.0129252	0.0526384	7.05842	-979.77	8.65337e-06	0.000186396	0.395024	0.0573335	5.33821	0.168855	0.156426	0.0711385	0.0185227	0.0902905	-0.126211	0.100177	0.158946	0.215097	5.407	0.0286481	0.0575507	0.584015
FBgn0052284	CG32284	4.20379	4.34839	0.0558393	-0.202894	-1.88842	-0.0537265	-0.00586198	0.0269754	-0.00237231	0.171907	-0.0511756	2.73037	-762.858	4.05778	4.03987	-0.0207664	-0.0183072	-0.601989	-0.225364	0.0290161	2.51029	-776.189	2.32725e-05	0.000387324	0.414618	0.567998	4.12878	0.259805	-0.466088	1.23234	-0.00611792	0.163624	0.0026532	0.124525	-0.0502067	0.298995	4.0583	0.0496821	-0.216207	0.367381
FBgn0052409	CG32409	8.36648	8.35363	-0.0418089	-0.0326756	-0.0726158	-0.0175766	-0.00353357	-0.0168671	-0.0234878	0.0124268	0.0170468	172.434	-1108.77	8.3915	8.35732	-0.181311	-0.180991	0.0105987	0.0877184	-0.00540238	129.081	-1139.32	1.70286e-12	4.31238e-10	-0.0292207	0.00805933	8.3579	0.00795468	-0.0602675	0.0376333	-0.0209447	0.0154912	0.0164117	0.0223974	-0.151054	0.0573016	8.36097	0.0265492	-0.00139265	0.0586243
FBgn0052475	mthl8	6.0193	5.71269	0.222456	0.0596764	-0.264592	0.766901	0.023886	-0.170887	0.0366609	-0.0372469	-0.533126	3.73504	-949.117	6.57415	6.34826	-1.23143	0.528975	-0.28748	-1.9826	-0.0759439	1.58253	-1009.03	0	0	0.164431	0.357475	5.95813	0.346937	0.379382	4.20147	0.20674	0.316959	-0.0512835	0.723863	0.138491	1.02406	6.38261	0.185549	0.0807638	1.70623
FBgn0052476	mthl14	5.63891	5.61738	0.136564	0.202369	-0.18859	0.0690228	0.00645769	-0.00485674	-0.0424477	0.0171299	-0.0263962	21.0599	-865.734	5.64262	5.65287	-0.00388681	-0.0312906	-0.00345666	-0.109918	-0.000102596	19.4548	-877.648	8.64386e-05	0.000992453	0.263656	0.07531	5.58603	0.157649	-0.109541	0.209934	-0.0129107	0.0237668	0.11139	0.78676	0.0409489	0.492475	5.66213	0.0381187	-0.112397	0.131189
FBgn0052523	CG32523	5.68957	5.52988	0.1002	0.100045	-0.325905	0.698696	0.0132877	-0.166142	-0.131422	-0.00947696	-0.0885707	5.70221	-916.497	6.26248	6.26542	-1.05028	-0.87448	-0.317297	-0.173822	-0.0713081	3.41068	-946.281	3.57503e-12	8.81527e-10	0.119568	0.049834	5.61011	0.102778	-0.212928	1.05472	-0.142881	0.0198958	0.0642966	0.252036	-0.888171	0.0343144	6.27011	0.0314542	-0.339663	0.150075
FBgn0052594	be	7.24953	7.07958	0.00774915	0.0695631	0.021603	0.0404112	0.0167252	0.000831884	0.00385128	-0.0158938	0.0178337	106.86	-1005.35	7.20709	7.08959	0.0139272	0.0980569	-0.0373643	0.131467	0.01931	84.3229	-1017.38	7.7471e-05	0.000910794	-0.126838	0.139465	7.14864	0.109285	0.0436186	0.0325923	0.0918994	0.0902946	-0.024238	0.0290975	0.0608909	0.0725984	7.07843	0.161855	0.0755041	0.0982784
FBgn0052726	CG32726	4.77029	4.66133	-0.173456	-0.0159609	-0.306483	-0.134356	0.0188927	0.0250844	-0.0209922	-0.00733537	-0.067304	20.7963	-736.123	4.85453	4.66608	0.0229022	-0.0896811	-0.40508	-0.503678	0.00995575	14.2318	-749.12	3.17208e-05	0.000484867	-0.0637111	0.180721	4.70803	0.0541107	-0.198231	0.234808	0.0480986	0.0964041	-0.803791	0.645951	-0.0346057	0.156916	4.63144	0.190096	-0.388985	0.0878773
FBgn0053281	CG33281	5.17387	5.17688	0.0497421	0.0529353	-0.145356	0.189689	-0.0430836	-0.0117473	-0.0240939	0.0194915	-0.0779431	11.0242	-784.742	5.37579	5.30545	-0.193433	-0.0784061	-0.0883166	-0.209519	-0.0633031	9.75811	-796.838	7.30615e-05	0.000874312	0.0946671	0.0821152	5.11583	0.112261	-0.0185001	0.561679	-0.0149351	0.0226683	0.00575241	0.0609435	-0.132418	0.175113	5.30417	0.119585	-0.123419	0.233358
FBgn0053329	Sp212	5.49703	5.45402	0.044044	0.0931321	-0.0423527	0.208074	0.0225475	0.00603358	-0.025743	-0.0074833	-0.0642862	22.2752	-858.881	5.62461	5.51703	-0.0392549	-0.0102456	-0.0590679	-0.215069	0.00573904	19.1426	-871.928	3.02848e-05	0.000467494	0.0655685	0.0569217	5.49616	0.0521908	0.024404	0.178482	-0.0168877	0.0330305	0.181538	0.32085	-0.000284863	0.0408798	5.51561	0.294717	-0.175683	0.103098
FBgn0053481	dpr7	5.50865	6.00204	-0.0994235	0.348304	-0.107296	0.450503	-0.0342196	0.023063	-0.0819195	0.00594605	-0.0116521	8.82854	-917.433	5.71566	6.19701	0.0684585	-0.270424	-0.0698477	0.216574	-0.0449125	7.06346	-931.874	8.25578e-06	0.000180319	0.369066	0.441979	5.73939	0.225182	-0.45041	1.28593	0.0804358	0.670383	-0.00925018	0.0732087	-0.215163	0.0797016	5.98157	0.450527	0.148022	0.234919
FBgn0053532	lectin-37Da	5.49691	6.05938	0.0240785	0.458635	-0.928556	-0.758649	-0.0171627	0.131974	-0.137214	0.121286	0.0178571	2.11304	-1012.33	5.49639	5.51654	0.811616	-0.0751413	-0.266917	-0.322819	0.0105786	1.69225	-1027.09	6.1574e-06	0.000143877	0.401893	0.808127	5.76722	0.91578	-0.899721	0.200826	-0.00938012	0.738057	0.0279277	0.130447	0.259036	0.652431	5.47019	0.0855519	-0.257003	0.0495408
FBgn0053548	SmydA-8	6.19347	6.1574	-0.203313	0.0366829	-0.209175	0.256202	-0.0189998	0.0206415	0.000547517	-0.0102389	-0.0822148	24.1401	-900.097	6.22313	6.1868	-0.0161478	0.0280113	-0.262436	-0.263667	-0.0252387	20.0436	-919.606	6.90172e-08	4.01671e-06	0.114111	1.28201	6.18423	0.085909	-0.208789	0.517725	0.00083374	0.0447822	-0.0328086	0.0874909	0.00366631	0.0245071	6.18872	0.0693687	-0.205904	0.0566371
FBgn0058006	CG40006	7.5039	7.42459	0.0436122	0.0165804	0.140131	0.0224488	0.0109731	-0.00402714	0.0167839	-0.0303464	0.00290025	95.1485	-1047.71	7.52257	7.47864	-0.0221805	0.130948	-0.0315996	0.00580127	0.00523477	71.8624	-1069.37	8.87978e-09	7.77603e-07	-0.0058818	0.14371	7.41725	0.12163	0.0992856	0.0589346	-0.0171605	0.0379714	0.00894699	0.0263993	0.0605457	0.154158	7.47703	0.158143	-0.0291967	0.0387193
FBgn0063492	GstE8	6.90664	6.78803	0.0617434	0.0381483	-0.20972	0.244669	-0.0166912	-0.0420418	0.0245105	0.0405078	0.0275413	15.8541	-1056.82	6.83321	6.73631	-0.0758067	0.270401	0.0608308	0.398362	-0.0082328	15.8452	-1069.22	5.51725e-05	0.00071503	0.0495408	0.0898836	6.9309	0.146374	0.421129	0.876388	-0.0333067	0.0500489	0.0372559	0.0101655	-0.00846495	0.387829	6.7465	0.0676971	0.237896	0.248037
FBgn0063495	GstE5	4.96385	4.98301	0.323399	0.311645	-0.955626	0.214619	-0.0158478	-0.0262751	-0.0617502	0.100354	-0.0317982	8.59167	-802.027	5.02468	5.07024	0.382978	-0.0874205	0.0320794	0.0139278	-0.0316589	7.1166	-820.599	1.68261e-07	8.58444e-06	0.303652	0.0188886	4.99542	0.105425	1.0238	1.95031	-0.0534789	0.0265986	0.0752295	0.156748	-0.0465101	0.176216	5.06436	0.0442365	0.132108	0.167009
FBgn0063499	GstE10	6.19789	5.69732	-0.678011	0.296812	-0.707285	0.415407	-0.0176941	0.00596227	-0.0812025	0.0850415	0.0141787	11.0396	-920.512	6.14192	5.61017	-0.410321	-0.180126	-0.0412252	0.589911	-0.0125382	7.91262	-951.596	1.01541e-12	3.06916e-10	0.105835	0.528618	5.84673	0.36103	0.183605	1.26557	-0.299203	0.650321	0.0676117	0.0575934	-0.241544	0.861132	5.88319	0.668783	0.385622	0.840309
FBgn0064237	Idgf5	6.45112	6.22057	-0.0865557	-0.0736658	-0.769293	0.14525	-0.00593968	0.0288754	-0.00212601	0.0449373	-0.0253635	11.9419	-991.399	6.42623	6.15594	0.0871728	0.0263526	-0.368005	0.0641945	-0.00311394	10.8018	-1003.35	8.36078e-05	0.00096962	-0.0990373	0.0389604	6.65536	0.283762	-0.283172	1.77389	0.0411802	0.0414229	-0.0588365	0.154446	0.0829379	0.229201	6.27803	0.225251	-0.192403	0.34761
FBgn0083940	RhoU	6.35404	6.62225	0.181755	0.104917	0.195698	0.042274	0.0359288	-0.0353373	-0.00348508	-0.0115631	-0.0796908	43.8467	-970.938	6.46447	6.76104	0.00627619	0.0651434	0.0751637	-0.464407	0.016708	34.0119	-1001.82	1.23246e-12	3.39651e-10	0.0727922	0.0989098	6.65763	0.382428	0.207327	0.205476	-0.0110167	0.0292372	0.113518	0.26013	0.0561045	0.0821364	6.6546	0.72797	-0.270892	0.291579
FBgn0085240	CG34211	4.46423	4.4011	0.132645	0.0841279	0.265925	0.611862	0.129894	-0.166476	-0.0770621	-0.0252777	-0.108103	4.06686	-888.201	4.87106	4.84239	-1.08745	-0.482209	0.181297	0.0460307	0.0648796	3.66251	-900.426	6.48665e-05	0.000797137	0.0272044	0.140968	4.42248	0.0602575	0.365656	1.04634	-0.095583	0.0949734	0.0760261	0.309978	-0.954203	1.06519	4.85201	0.0336299	0.0828676	0.0721529
FBgn0085313	CG34284	5.59881	5.47313	-0.190748	0.179662	-0.15551	0.0963248	-0.0278633	0.0484243	-0.000518885	0.0328412	-0.0430916	14.6459	-846.97	5.59329	5.4558	0.240455	0.175533	0.0665185	-0.243679	-0.0221242	13.7292	-866.806	5.05622e-08	3.13754e-06	-0.159083	0.276062	5.56547	0.0552543	-0.0409944	1.08282	0.0565274	0.0885542	-0.00857302	0.054178	0.222042	0.109185	5.48298	0.194951	-0.115445	0.129014
FBgn0085397	Fili	3.8176	4.02038	0.0259407	0.224383	-0.051661	0.218539	0.0113716	0.0163511	-0.039742	0.0112696	-0.045045	22.073	-630.956	4.01542	4.06316	0.0747846	0.0265555	-0.0947728	-0.0631209	-0.0010728	15.8709	-642.902	8.39184e-05	0.000971959	0.117163	0.433295	3.98901	0.336043	-0.263201	0.441669	0.227554	0.357646	-0.0262585	0.0341506	0.0562769	0.0486448	4.03158	0.0228594	0.0148163	0.233912
FBgn0085732	CR40190	4.65257	4.45093	0.181224	0.222469	0.344978	0.00579113	0.0326851	0.00603317	0.00256347	-0.072249	-0.141993	14.9441	-751.09	4.81511	4.65155	0.253473	0.191092	-0.177998	-0.902841	0.00731661	9.57256	-779.729	1.08107e-11	2.35572e-09	0.248687	0.0702343	4.17143	0.89627	-0.249074	0.495077	0.0102563	0.0313209	-0.0850142	0.132441	0.27145	0.0627617	4.73213	0.0733892	-0.0677466	0.586658
FBgn0086608	CG34112	4.91578	4.93127	0.048954	0.102706	-0.330233	0.18078	0.0071178	0.000642403	-0.0363213	0.025823	-0.0393781	22.968	-747.254	5.03991	5.03301	-0.0806873	-0.124009	-0.203919	-0.0544439	-0.00605829	21.6003	-760.035	3.87977e-05	0.000565373	0.138493	0.0957287	4.93641	0.101255	-0.0261906	1.08001	-0.0660991	0.0814444	0.0108478	0.146311	0.0711454	0.139795	5.03033	0.0274423	-0.160561	0.43127
FBgn0250753	kra	10.5388	10.5916	0.0978054	0.141236	0.210841	0.102982	0.0201572	0.00722291	0.0154386	-0.086119	-0.0349435	44.6826	-1594.7	10.6368	10.7472	0.168335	0.205597	-0.278482	-0.201418	0.00163174	26.3357	-1634.47	2.22045e-16	1.48611e-13	0.124973	0.0629251	10.5737	0.0771904	0.16682	0.0658766	0.00561685	0.228108	-0.0600673	0.0542095	0.194472	0.0325428	10.7632	0.0945068	-0.15185	0.19067
FBgn0259224	CG42324	7.03881	6.65832	-0.107113	0.121462	-0.269005	0.648526	0.0179573	-0.00449269	-0.0151818	0.0311382	-0.0824184	19.4392	-1087.76	7.06712	6.78355	0.0204004	0.0153598	0.0766307	0.107234	0.00281312	14.544	-1107.19	7.48618e-08	4.27717e-06	0.0826776	0.188926	6.6657	0.285306	-0.245366	1.68482	-0.00440165	0.0221716	0.249701	0.358285	0.0124079	0.00468766	6.55082	3.24091	0.0544508	0.126719
FBgn0259714	DIP-epsilon	5.1146	5.10451	-0.103813	0.113645	-0.15628	0.267	0.0288693	0.00711364	-0.0510507	0.000815679	-0.0561307	23.461	-796.556	5.14327	5.13183	-0.0656429	-0.151462	-0.0682869	-0.0684553	0.0176584	17.5918	-814.28	3.75769e-07	1.68723e-05	-0.0313819	0.133455	5.13495	0.0973642	-0.0188199	0.456604	0.138207	0.360581	-0.0218602	0.0872891	-0.0722169	0.364842	5.13119	0.0714129	-0.0738073	0.028862
FBgn0259716	CG42370	5.43098	5.31966	0.0421845	0.0223317	-0.810908	0.276226	0.031561	0.041424	-0.0683971	0.0863764	-0.0626654	11.5617	-887.317	5.45064	5.34136	0.206734	-0.399032	-0.190378	-0.147378	0.0331152	8.06386	-918.317	1.10145e-12	3.22519e-10	0.0357805	0.063645	5.42128	0.142564	-0.702994	1.46921	0.0132902	0.508525	-0.164951	1.27045	-0.0450848	0.599574	5.33434	0.488481	-0.179115	0.0696527
FBgn0259977	Tdc1	5.756	5.687	0.0149646	0.2798	-0.0863093	0.0973473	0.0037786	0.00434581	-0.0400626	-4.86764e-05	-0.048725	40.9547	-838.813	5.8652	5.74374	-0.0171962	0.0683358	-0.151255	-0.19866	-0.00758868	37.8884	-850.852	7.70857e-05	0.000907403	0.123022	0.208369	5.7175	0.0344014	-0.501828	1.1406	0.014546	0.0791383	-0.0445912	0.0395342	0.0492254	0.052622	5.78219	0.0891154	-0.228175	0.077981
FBgn0260720	CR42547	4.23457	3.80226	-0.268411	0.435144	-0.265145	0.479347	0.025874	-0.0203777	-0.0390935	-0.00784124	-0.0676509	19.25	-656.835	4.40567	4.04145	-0.539268	0.143943	-0.220745	0.0257485	0.001545	14.9282	-670.095	2.4845e-05	0.000406047	-0.0573023	1.86061	3.90277	0.391052	0.17877	0.540999	-0.0277564	0.0241162	0.0133065	0.422693	-0.0842967	0.326693	4.13299	0.29972	-0.128004	0.776066
FBgn0260874	Ir76a	5.97738	5.73941	-0.141202	-0.400083	-0.333844	0.086695	0.00647999	-0.0225181	-0.0933731	0.0305553	0.0399947	9.45305	-939.337	6.0037	5.8383	-0.0466351	-1.05995	-0.0203469	0.411495	-0.00991862	7.80893	-953.73	8.63705e-06	0.000186396	-0.270255	0.156009	6.19371	0.785728	-0.132779	0.397804	-0.0378997	0.21558	0.0210649	0.0312185	-0.107213	1.5052	5.88194	0.115108	0.162103	0.3268
FBgn0261380	mRpL37	8.08956	8.0856	-0.0351061	-0.0507226	-0.0431781	-0.0817348	-0.00432466	-0.00222508	0.00559941	0.00825589	0.0200424	297.287	-1054.79	8.02623	8.03226	-0.0356299	-0.01679	0.0275737	0.0521302	0.00419141	203.899	-1066.82	7.77785e-05	0.000913264	-0.181086	0.272302	8.09184	0.00908632	-0.0767627	0.062556	-0.00802092	0.0195554	0.0140709	0.0234815	-0.102501	0.0994004	8.01772	0.0196934	0.0416768	0.022155
FBgn0261429	CR42646	4.69325	4.66557	0.304833	0.18876	0.492987	-1.00329	-0.0601976	0.0753898	0.0712968	-0.0451731	-0.193928	7.12933	-744.491	4.84525	4.79665	0.857138	0.84288	0.118282	-1.994	-0.0802856	4.10063	-771.686	4.36142e-11	7.5553e-09	0.385288	0.214927	4.68249	0.24425	0.948975	1.21798	0.0713528	0.0161389	-0.143081	0.0971171	0.913443	0.104599	4.8144	0.0546398	0.320228	3.16435
FBgn0261456	hpo	8.34493	8.37449	0.0417172	-0.00253859	0.145234	-0.0256238	0.0107905	-0.0112602	0.00566056	-0.0089377	0.00953427	116.792	-1159.27	8.34921	8.37343	-0.0311003	0.0339536	0.0705278	0.0395374	0.00964561	128.215	-1171.36	7.38897e-05	0.00088197	0.0169163	0.0389636	8.31449	0.0889218	-0.104177	0.318542	-0.00233165	0.0864569	0.00395957	0.0068862	-0.0533974	0.194155	8.36893	0.0524909	0.0722874	0.0364323
FBgn0261509	haf	4.72734	4.18491	0.614259	0.45594	-0.522052	0.30848	0.071229	-0.0503886	-0.11187	0.0149688	-0.102254	8.06843	-810.248	5.07582	4.38622	0.203139	-0.114845	-0.504951	-0.240119	0.0329312	6.01498	-832.68	4.24252e-09	4.22898e-07	0.424979	0.167401	4.53432	0.293567	-0.542347	1.4746	-0.0289904	0.171661	0.00563633	0.172309	0.0708125	0.233266	4.8838	0.59974	-0.524616	0.140902
FBgn0261530	nbs	8.38163	8.42619	0.0307943	-0.0459392	0.0672061	-0.0804107	0.00322496	-0.00497785	0.00516371	-0.00505777	0.0149975	243.333	-1105.86	8.34201	8.41377	-0.0220937	-0.000197418	0.0819222	0.0416835	0.00442297	236.285	-1119.32	2.0705e-05	0.000352737	0.0299242	0.407267	8.4355	0.0512023	0.00166454	0.101545	-0.00213365	0.0160215	0.219674	0.227118	0.0064436	0.0210376	8.26915	0.127725	0.047476	0.0551535
FBgn0262100	CG42853	3.543	3.70536	1.33011	0.575245	1.28314	-0.190053	-0.0548589	0.0342789	0.00207354	-0.0655041	-0.191494	1.96287	-698.387	3.64718	3.85228	1.74245	0.708157	0.780082	-1.01461	-0.0815035	1.78454	-712.99	7.09431e-06	0.000159554	0.401302	2.00592	3.57995	0.123346	0.396307	1.40431	0.014119	0.250277	-0.134702	0.0811801	1.082	0.741541	3.79932	0.224701	-0.834576	1.45424
FBgn0262870	axo	6.70869	6.76259	-0.1442	0.0948589	-0.308035	0.138601	0.0110995	0.0312328	-0.0253642	0.0307035	-0.0440876	17.9603	-1050.76	6.62411	6.68971	0.104671	0.0497674	-0.0205566	-0.0801982	0.0190327	15.9438	-1063.63	3.57737e-05	0.000532909	-0.217944	0.344937	6.75694	0.0726607	-0.383646	0.404524	0.0159088	0.198211	-0.0729597	0.0547407	0.0434252	0.068679	6.65572	0.0489661	0.0206895	0.0859759
FBgn0263027	CG43322	6.26361	6.35909	-0.0457673	-0.0599782	0.223039	-0.13824	-0.00178676	0.0157509	0.0176758	-0.015198	0.0275364	76.5889	-884.597	6.2011	6.29649	0.084731	0.0719924	0.108189	0.0612147	0.00689804	65.7665	-898.352	1.5679e-05	0.000289198	0.273517	0.424058	6.26243	0.235186	-0.19002	0.72326	0.00845296	0.0617353	-0.0121178	0.0401606	0.0731648	0.0353167	6.19637	0.083697	0.104836	0.0336918
FBgn0263133	mEFG1	8.15344	8.23367	0.00947795	-0.0478547	0.0820984	-0.0328845	-0.00164983	0.00528781	0.0154025	-0.00662593	0.0160403	187.428	-1101.51	8.13478	8.22959	0.0694802	0.0407475	0.0385317	0.0405913	0.00128213	148.697	-1115.28	1.54536e-05	0.000285849	-0.0455536	0.286053	8.35896	0.261974	0.0278896	0.156551	0.00404966	0.0116471	-0.0245692	0.0861347	0.0353837	0.0178514	8.15957	0.103723	0.0569326	0.0352093
FBgn0263143	vret	8.3847	8.41528	-0.00309026	0.0109913	0.102559	0.0176296	-0.021804	-0.000514999	0.0086291	-0.0272867	0.0212899	45.9809	-1198.77	8.35063	8.39824	-0.0157267	0.0149702	-0.0562752	0.173674	-0.0179248	50.1742	-1213.66	5.4343e-06	0.000130562	0.000579731	0.0191527	8.30634	0.17405	0.0435677	0.0972185	-0.00131134	0.00900532	0.0228361	0.0775991	-0.107784	0.240828	8.37954	0.0449583	-0.0255921	0.263718
FBgn0263390	Nha2	6.80084	6.88138	-0.156869	0.148969	-0.419184	0.065364	-0.0168644	0.0245994	-0.0324231	0.036112	-0.0289166	18.2361	-1033.63	6.83994	6.84043	-0.0236183	-0.0101342	-0.168448	-0.138509	-0.0203719	17.1417	-1049.84	1.56718e-06	5.01178e-05	0.534794	0.703635	6.83376	0.0691604	-0.223481	0.608054	0.160425	0.201959	-0.0137877	0.044713	-0.00511972	0.0668997	6.83945	0.040199	-0.148901	0.0466688
FBgn0263746	CR43671	4.81786	4.89177	-0.128909	-0.18819	-0.206372	-0.266266	0.00774519	0.00348683	-0.0274194	0.0211428	0.0292631	60.358	-680.301	4.78368	4.84357	-0.0634636	-0.312302	-0.0375241	-0.0426655	0.0128749	45.3822	-698.705	1.97371e-07	9.88967e-06	-0.175926	0.190755	4.92181	0.230886	-0.327283	0.260953	-0.0228882	0.832214	0.0323503	0.0132813	-0.0545729	0.21895	4.81222	0.041982	-0.0201059	0.0406751
FBgn0263855	BubR1	8.58064	8.6192	0.0302497	-0.0525771	0.145768	-0.0704183	0.00198519	-0.00821932	0.0108545	-0.00496722	0.01968	89.1262	-1213.98	8.58218	8.61197	-0.018983	0.0153799	0.0886348	0.0904098	0.00431716	85.81	-1226.04	7.58224e-05	0.00089704	0.0227358	0.171715	8.62473	0.0531738	-0.23846	1.08518	0.0128728	0.0900579	-0.00939057	0.118076	0.00191935	0.0218019	8.51779	0.128742	0.0973327	0.0157897
FBgn0263934	esn	4.64632	4.61933	-0.275472	0.111731	0.0560914	0.245796	0.0468603	-0.00916877	-0.0765995	-0.0186335	-0.0694198	16.3628	-757.778	4.82489	4.75314	-0.379751	-0.359101	-0.0743894	-0.0544875	0.0180447	12.5047	-771.965	1.04754e-05	0.000211084	-0.313558	0.819408	4.59185	0.0549742	0.0981063	0.149741	0.0209386	0.103677	-0.0370995	0.101892	-0.403501	0.0819622	4.78005	0.257105	-0.0509686	0.034906
FBgn0264443	CG43861	4.26844	4.26204	-0.175683	0.300732	-0.307198	0.137585	-0.0170078	0.0284007	-0.052118	0.0211268	-0.020053	13.9195	-660.066	4.42631	4.4224	-0.0959946	-0.105419	-0.216184	-0.211373	-0.0266007	13.4938	-674.228	1.07155e-05	0.000214081	-0.272954	0.681946	4.30274	0.0422543	0.0104837	0.330542	0.000446302	0.101116	-0.00470931	0.0335975	-0.101948	0.0175295	4.41544	0.0111139	-0.187597	0.661389
FBgn0264721	CR43989	4.59722	4.61051	-0.0654262	0.17925	-0.197	-0.00289871	0.0176839	0.030399	0.0332471	-0.0175888	0.0290514	43.1614	-706.195	4.52188	4.55624	0.115625	0.380855	-0.296807	0.193846	0.0305731	33.311	-718.212	7.86584e-05	0.000922439	-0.528111	0.704094	4.61359	0.117271	-0.236686	0.562334	0.0443382	0.0173138	-0.0572423	0.0625757	0.391431	0.44778	4.55679	0.0709181	-0.136292	0.357939
FBgn0265048	cv-d	6.87944	6.83268	-0.105244	0.00681568	-0.384151	0.0658469	-0.00406465	0.0314351	-0.0381472	0.0432943	-0.0096444	22.1344	-1031.36	6.83974	6.78115	0.120457	-0.285771	-0.064139	-0.0052403	0.00441122	19.3354	-1048.59	5.99858e-07	2.49808e-05	-0.041365	0.0865569	6.8438	0.0275296	0.12678	0.444272	0.0343095	0.0620496	-0.0545454	0.104071	-0.155887	0.343775	6.81181	0.0564003	-0.0506794	0.116659
FBgn0265185	CG44250	7.42645	7.46384	0.019165	0.0855126	-0.434529	0.22045	-0.033219	0.0233035	-0.0395224	0.0529627	-0.0512086	13.7574	-1137.32	7.43182	7.43995	0.118185	-0.132691	-0.109678	-0.148961	-0.0354044	10.0621	-1151.99	6.67595e-06	0.000152403	0.0170491	0.149699	7.52203	0.0918151	0.189206	0.772145	-0.0133753	0.161988	0.257949	0.362741	0.0124483	0.508925	7.42043	0.0472588	-0.0993593	0.0923279
FBgn0265295	pncr014:3L	5.43711	5.32465	0.218138	0.209602	0.45521	-0.00709365	-0.0728569	0.0108709	0.013822	0.0373239	0.0935323	17.0188	-813.386	5.32346	5.22518	0.172133	0.251768	0.678586	0.597508	-0.0494024	14.0893	-831.19	3.48502e-07	1.59291e-05	0.22661	0.031738	5.42445	0.329951	0.2009	1.02158	-0.00473413	0.0559154	0.358054	0.808737	0.246048	0.0182677	5.24885	0.0761938	0.868296	0.290208
FBgn0266005	CR44779	5.87554	5.84743	0.197218	0.127394	-0.234681	-0.230194	-0.0157518	-0.0591744	-0.012788	0.0335334	0.0520074	16.5656	-894.798	5.82863	5.8542	-0.314901	0.0418698	0.078872	0.158686	-0.0159493	12.5191	-920.942	1.20062e-10	1.87497e-08	0.0465603	0.255858	5.83626	0.0274703	-0.223464	0.0247677	-0.0338781	0.0268138	0.0612028	0.0506907	-0.0957404	0.516367	5.83242	0.0504831	0.176035	0.168081
FBgn0266417	ringer	6.56151	6.57835	-0.12141	0.0669801	-0.330268	0.108076	0.00436017	0.002259	-0.0326962	0.0308717	-0.0342005	27.6165	-985.223	6.54187	6.53471	-0.101889	-0.101511	-0.103233	-0.0973294	0.0075852	21.8323	-998.303	2.9365e-05	0.00045796	0.324959	0.974325	6.55988	0.0401652	0.192093	0.78691	-0.103147	1.28533	0.0450106	0.0955216	-0.102918	0.0284014	6.55809	0.175233	-0.104819	0.0234024
FBgn0266758	Esyt2	7.08351	7.05514	0.0661496	0.307326	-0.104965	0.211621	0.0259802	0.013568	-0.0440535	0.0165584	-0.0485358	21.6303	-1104.81	7.10204	7.04869	0.121118	0.0158684	0.0353301	-0.0238258	0.0187167	18.9035	-1118.62	1.49581e-05	0.000280787	0.390073	0.67687	7.04904	0.0979745	-0.0596009	0.937481	0.0564248	0.110548	-0.0213337	0.05899	0.122902	0.241118	7.06169	0.0398782	0.025225	0.0627564
FBgn0267084	CR45528	3.62274	4.33606	0.338945	0.712431	-1.34936	1.37129	-0.0932217	-0.0492765	-0.131237	0.129192	0.115299	1.93902	-705.278	3.55644	4.25616	0.0800534	0.290279	-0.140883	2.45977	-0.0891953	1.88532	-728.368	2.25971e-09	2.43374e-07	0.207578	0.678947	4.01494	0.298088	0.341601	2.16978	-0.0655488	0.128814	0.0921626	0.0455375	0.238174	0.0827117	3.87817	0.604308	0.814922	2.85814
FBgn0267408	AOX1	9.02893	9.10957	-0.0570502	-6.46966e-05	-0.321118	0.0907645	0.0124237	0.0799616	-0.017719	0.0592219	-0.0248722	11.8815	-1456.43	8.8939	8.96409	0.45056	-0.21283	0.0659496	-0.0520763	0.0351697	10.1776	-1479.11	3.34798e-09	3.40984e-07	0.0973479	0.504845	9.02282	0.153542	-0.145161	0.319489	-0.0224911	0.0780345	0.064811	0.154513	-0.140469	1.06538	8.94886	0.0624078	0.0459242	0.111201
FBgn0267914	CR46195	5.43966	5.38983	-0.0319464	0.0892476	-0.466401	0.310469	-0.000817038	-0.0449611	-0.080569	0.0147088	-0.0740548	9.733	-851.391	5.7374	5.55862	-0.498633	-0.495083	-0.500215	-0.203246	-0.0305922	9.18728	-867.163	2.37022e-06	6.81256e-05	0.0856055	0.129671	5.03771	0.505612	-0.0012291	0.398148	-0.102075	0.128513	0.00705358	0.513176	-0.502719	0.0467076	5.59999	0.156589	-0.320179	0.23774
FBgn0267967	corolla	5.43688	6.10522	-0.0717803	-0.322876	0.324451	-0.104105	0.00706341	0.015462	-0.000989992	-0.00148122	0.0549701	23.8442	-898.085	5.37013	6.0695	0.0588435	-0.340177	0.368209	0.349025	0.0117885	19.2281	-910.261	6.79006e-05	0.000826271	-0.375651	0.396508	5.89014	0.66973	0.125878	0.173256	-0.0272247	0.284097	0.0678074	0.184106	-0.247065	0.38395	5.2719	0.877544	0.35431	0.0304216
FBgn0283440	solo	5.41278	5.47854	-0.0530128	-0.0825801	-0.0616636	-0.0171996	0.012739	-0.00438851	-0.0244227	-0.000794587	0.019546	97.6941	-738.398	5.44722	5.51505	-0.0844774	-0.25978	-0.0875473	0.121681	0.00920726	96.0085	-755.391	7.50217e-07	2.92897e-05	-0.0596786	0.0402108	5.43029	0.039717	-0.0356671	0.0503461	-0.00777543	0.0339102	0.0674805	0.069014	-0.232636	0.0815073	5.45176	0.0479365	0.0690189	0.154418
FBgn0283471	wupA	8.62051	8.73177	-0.0791809	-0.0595964	-0.414669	0.0935503	-0.0136388	0.0209569	-0.0104194	0.0333476	-0.0531403	19.9084	-1314.79	8.65741	8.67146	0.0287316	0.00563255	-0.110267	-0.0665357	-0.0191203	17.3129	-1328.51	1.62622e-05	0.000294379	-0.0690421	0.027006	8.77076	0.0804515	-0.367146	0.379854	-0.0157972	0.0281516	0.0889769	0.125561	-0.0114409	0.0541882	8.62549	0.107601	-0.032711	0.112251
