# Supplementary material for: Nonlinear expression patterns and multiple shifts in gene network interactions underlie robust phenotypic change in Drosophila melanogaster selected for night sleep duration
Source: PLoS Comput Biol. 2023 Aug 10;19(8):e1011389. doi: 10.1371/journal.pcbi.1011389 (PMC10443883; doi:10.1371/journal.pcbi.1011389)
Supplement: S10 Table — The table lists GO classification (Biological Process (BP), Molecular Function (MF), or Cellular Component (CC)); the GO term description; the number of genes associated with each GO term and their percentage relative to the total number of genes with that GO term in D. melanogaster; the enrichment P value, and the Benjamini-adjusted P value. (XLSX) [file pcbi.1011389.s018.xlsx]

## Sheet: S10 Table
Category	Term	Count	%	P-Value	Benjamini-adjusted P-Value
GOTERM_BP_ALL	proteolysis	12	14.1	0.01	1
GOTERM_BP_ALL	oxidation-reduction process	8	9.4	0.05	1
GOTERM_BP_ALL	transmembrane transport	7	8.2	0.076	1
GOTERM_BP_ALL	peptidyl-amino acid modification	5	5.9	0.085	1
GOTERM_CC_ALL	plasma membrane	15	17.6	0.0032	0.35
GOTERM_CC_ALL	cell periphery	15	17.6	0.0077	0.4
GOTERM_CC_ALL	integral component of plasma membrane	8	9.4	0.014	0.47
GOTERM_CC_ALL	intrinsic component of plasma membrane	8	9.4	0.016	0.42
GOTERM_CC_ALL	membrane part	25	29.4	0.021	0.43
GOTERM_CC_ALL	membrane	27	31.8	0.021	0.38
GOTERM_CC_ALL	integral component of membrane	22	25.9	0.033	0.47
GOTERM_CC_ALL	intrinsic component of membrane	22	25.9	0.036	0.46
GOTERM_CC_ALL	plasma membrane part	9	10.6	0.043	0.47
GOTERM_MF_ALL	endopeptidase activity	12	14.1	9.2e-05	0.019
GOTERM_MF_ALL	serine-type endopeptidase activity	9	10.6	0.00041	0.042
GOTERM_MF_ALL	serine-type peptidase activity	9	10.6	0.00069	0.047
GOTERM_MF_ALL	serine hydrolase activity	9	10.6	0.0007	0.036
GOTERM_MF_ALL	peptidase activity, acting on L-amino acid peptides	12	14.1	0.0015	0.06
GOTERM_MF_ALL	peptidase activity	12	14.1	0.0018	0.06
GOTERM_MF_ALL	catalytic activity	38	44.7	0.01	0.27
GOTERM_MF_ALL	iron ion binding	5	5.9	0.018	0.37
GOTERM_MF_ALL	monooxygenase activity	4	4.7	0.037	0.59
GOTERM_MF_ALL	heme binding	4	4.7	0.053	0.68
GOTERM_MF_ALL	transporter activity	11	12.9	0.054	0.66
GOTERM_MF_ALL	tetrapyrrole binding	4	4.7	0.054	0.62
GOTERM_MF_ALL	oxidoreductase activity	9	10.6	0.067	0.67
GOTERM_MF_ALL	symporter activity	3	3.5	0.088	0.75
GOTERM_MF_ALL	oxidoreductase activity, acting on paired donors, with incorporation or reduction of molecular oxygen	4	4.7	0.089	0.73
GOTERM_MF_ALL	metalloendopeptidase activity	3	3.5	0.09	0.71
GOTERM_MF_ALL	transmembrane transporter activity	9	10.6	0.098	0.72
