# Supplementary material for: Nonlinear expression patterns and multiple shifts in gene network interactions underlie robust phenotypic change in Drosophila melanogaster selected for night sleep duration
Source: PLoS Comput Biol. 2023 Aug 10;19(8):e1011389. doi: 10.1371/journal.pcbi.1011389 (PMC10443883; doi:10.1371/journal.pcbi.1011389)
Supplement: S11 Table — (XLSX) [file pcbi.1011389.s019.xlsx]

## Sheet: S11 Table
FBID one	FBID two	Gene Symbol One	Gene Symbol Two	GP correlation (female, short)	GP correlation (male, short)	GP correlation (female, control)	GP correlation (male, control)	GP correlation (female, long)	GP correlation (male, long)	Spearman correlation (female, short)	Spearman correlation (female, control)	Spearman correlation (female, long)	Spearman correlation (male, short)	Spearman correlation (male, control)	Spearman correlation (male, long)
FBgn0031974	FBgn0032161	CG12560	CG4594	0.0627835	0.246386	-0.12503	0.0641937	-0.218684	-0.196812	0.0190387	-0.259797	-0.567233	0.301118	0.0198071	-0.439939
FBgn0031974	FBgn0052475	CG12560	mthl8	-0.194737	-0.20112	-0.253912	-0.454732	-0.190734	-0.146529	-0.094425	-0.469308	-0.6649	-0.269871	-0.600956	-0.509189
FBgn0031974	FBgn0261563	CG12560	wb	-0.067841	-0.0157599	-0.521177	-0.60142	0.0467926	-0.30464	0.311278	-0.694869	-0.0105865	0.0381627	-0.752412	-0.11722
FBgn0031974	FBgn0053958	CG12560	CG33958	-0.0947308	0.0383033	-0.406945	-0.697017	0.029004	-0.0868454	-0.0443097	-0.712542	0.234611	-0.138735	-0.701272	0.0244173
FBgn0031974	FBgn0264950	CG12560	CR44119	-0.641723	-0.193346	-0.669862	-0.790509	-0.44103	-0.762553	-0.450269	-0.818919	-0.870827	-0.26842	-0.802527	-0.755912
FBgn0031974	FBgn0031484	CG12560	CG3165	-0.259518	-0.0266305	0.058781	-0.19427	0.157308	-0.00585802	-0.193119	0.184923	0.425937	0.0886195	-0.142747	0.202937
FBgn0031974	FBgn0023507	CG12560	D2hgdh	0.414308	0.0461949	-0.098292	0.144034	-0.180235	-0.202696	0.176641	-0.131734	-0.503287	0.130795	0.251003	-0.183215
FBgn0031974	FBgn0030629	CG12560	CG9123	-0.170705	-0.0733128	-0.0247609	-0.472582	-0.306156	0.370974	-0.0495176	0.122855	-0.581661	0.0928882	-0.512678	0.662682
FBgn0031974	FBgn0028543	CG12560	NimB2	0.134151	-0.0419594	0.12028	-0.0105849	-0.0900714	-0.217764	0.109622	0.001366	-0.095791	0.100828	0.059165	-0.0111842
FBgn0031974	FBgn0259716	CG12560	CG42370	0.0547759	0.0395538	-0.300075	-0.343725	-0.140123	0.0103918	-0.147955	-0.433962	-0.237941	0.0811918	-0.25476	0.0768377
FBgn0031974	FBgn0052523	CG12560	CG32523	0.148675	-0.0734522	-0.434932	-0.545669	0.133671	0.547733	0.0863144	-0.494152	0.142064	-0.0478955	-0.517459	0.402715
FBgn0031974	FBgn0035496	CG12560	CG14990	0.221335	0.0832823	-0.18109	0.170574	0.0482765	0.310629	0.154273	-0.10578	0.041407	0.191753	0.24904	0.407411
FBgn0031974	FBgn0052553	CG12560	CR32553	0.527622	0.369311	0.423208	0.656624	0.117021	0.121313	0.41296	0.568855	-0.0804235	0.289422	0.464953	-0.0119525
FBgn0031974	FBgn0085732	CG12560	CR40190	-0.0415061	-0.298127	-0.379632	-0.675577	-0.210961	-0.40615	-0.190387	-0.418765	-0.651242	-0.146333	-0.6042	-0.648083
FBgn0031974	FBgn0004426	CG12560	LysC	0.294311	0.142254	-0.126403	-0.0105899	-0.185996	-0.445009	-0.169628	-0.524716	-0.731153	0.0370181	-0.24921	-0.700162
FBgn0031974	FBgn0053282	CG12560	CG33282	0.453151	-0.047895	-0.326835	-0.433273	-0.23657	-0.386416	0.231281	-0.504738	-0.483224	0.0132332	-0.36737	-0.245795
FBgn0031974	FBgn0262887	CG12560	CR43242	0.420631	0.182404	-0.0544455	-0.0856523	0.0259281	-0.0667533	0.312046	0.044139	0.0295398	0.193375	0.0467856	0.223512
FBgn0031974	FBgn0261429	CG12560	CR42646	0.381875	-0.212294	0.271541	0.102419	-0.197807	-0.254109	0.137625	0.238709	-0.579527	-0.207035	0.0507983	-0.613592
FBgn0031974	FBgn0030628	CG12560	CG9114	-0.157214	0.189869	0.0526053	-0.485489	0.465728	-0.185593	-0.0595919	0.0453342	0.623922	0.271749	-0.499189	-0.301545
FBgn0031974	FBgn0035767	CG12560	Cln7	0.269659	-0.0912818	0.171505	-0.123088	-0.144643	-0.323595	0.0684709	0.193546	-0.24904	0.0437975	0.00204901	-0.033211
FBgn0031974	FBgn0030773	CG12560	CG9676	0.128015	-0.170259	-0.0112187	0.0591299	-0.0102232	0.151776	0.0805942	0.10228	-0.16836	-0.0560915	0.187313	0.0547255
FBgn0031974	FBgn0004872	CG12560	piwi	-0.035918	0.152162	0.40105	0.232541	0.242621	0.115925	0.0608725	0.457782	0.387945	0.00187825	0.115342	0.581405
FBgn0031974	FBgn0031726	CG12560	Cyp6a16	0.505671	0.307734	0.513598	0.624879	0.248714	0.557171	0.374712	0.653206	0.434987	0.323572	0.677623	0.662853
FBgn0031974	FBgn0039612	CG12560	CG14523	0.33639	0.155318	0.431775	0.733034	0.193969	0.396909	0.116025	0.485017	0.270213	0.164518	0.54956	0.441475
FBgn0031974	FBgn0039525	CG12560	CG5646	0.120845	-0.119717	0.0103849	-0.214838	-0.143502	-0.495452	0.0980108	0.0261248	-0.306497	-0.0367113	-0.0187825	-0.262273
FBgn0031974	FBgn0263763	CG12560	CG43680	0.269844	0.166191	-0.292724	-0.272681	-0.0639585	-0.0845228	0.0630923	-0.281055	0.0117818	0.206693	-0.217451	0.00187825
FBgn0031974	FBgn0037225	CG12560	TwdlG	-0.000939788	-0.532875	-0.15261	-0.152518	-0.358179	-0.864083	-0.10134	-0.121318	-0.515752	-0.253223	-0.063263	-0.666012
FBgn0031974	FBgn0039886	CG12560	CG2003	0.815526	0.553634	0.45622	0.715876	0.625408	0.726562	0.70187	0.599932	0.631094	0.552292	0.636558	0.799539
FBgn0031974	FBgn0036787	CG12560	CG4306	0.501317	0.447974	0.199388	0.311906	0.623486	0.607825	0.259797	0.199437	0.481772	0.255528	0.324597	0.569026
FBgn0031974	FBgn0030993	CG12560	Mec2	0.205418	0.0118924	0.0464771	-0.164776	-0.332348	-0.35899	-0.0377358	-0.0692393	-0.335781	0.0395287	-0.0562623	-0.256211
FBgn0031974	FBgn0037230	CG12560	CG9780	0.197661	0.0765482	-0.133297	-0.225466	-0.199606	-0.320047	0.0315035	-0.293776	-0.31051	0.157176	-0.0674464	-0.169811
FBgn0031974	FBgn0050428	CG12560	CG30428	-0.0353489	0.0966021	-0.163519	-0.107536	0.00627095	0.0953153	-0.142406	-0.335012	-0.219329	0.170665	-0.0997183	0.203454
FBgn0031974	FBgn0267408	CG12560	AOX1	-0.000945884	0.0534245	0.097185	-0.0442186	-0.210736	-0.34268	0.0148553	-0.0478955	-0.242551	0.117562	0.0767523	-0.329036
FBgn0031974	FBgn0261509	CG12560	haf	0.00534143	-0.274749	-0.463486	-0.637008	-0.352978	-0.699685	-0.169299	-0.801759	-0.732519	-0.254674	-0.712627	-0.604542
FBgn0031974	FBgn0262007	CG12560	CG42825	0.398194	0.133903	0.0612399	0.00626549	0.10354	0.151613	0.131734	-0.0708614	0.233416	0.14565	0.0367113	0.197217
FBgn0031974	FBgn0030600	CG12560	hiw	0.420739	-0.30713	0.0226238	0.0251835	-0.256455	-0.710364	0.133271	0.0601895	-0.560915	-0.208742	0.20601	-0.644924
FBgn0031974	FBgn0037000	CG12560	ZnT77C	-0.234203	-0.0901421	-0.0856839	0.0489328	-0.323593	-0.309756	-0.159225	-0.09784	-0.487151	0.185776	0.105353	-0.296252
FBgn0031974	FBgn0040342	CG12560	CG3706	0.288608	0.0676653	0.645935	0.884588	0.179535	0.339021	0.255528	0.77939	0.368394	0.159225	0.751558	0.398958
FBgn0031974	FBgn0030367	CG12560	Cyp311a1	0.424529	0.0162981	0.166457	0.292483	0.0712424	0.0246399	0.217621	0.18202	0.0755571	0.0948519	0.206693	0.0935712
FBgn0031974	FBgn0027934	CG12560	alpha-Est4aPsi	0.179346	-0.151423	-0.16893	-0.180899	-0.123906	-0.0313882	0.129514	-0.205242	-0.110561	0.0521643	-0.1512	0.313327
FBgn0031974	FBgn0035243	CG12560	CG13926	0.168002	0.120302	-0.387569	-0.283137	0.304045	0.193595	0.0479809	-0.350038	0.532741	0.183642	-0.338001	0.391189
FBgn0031974	FBgn0034817	CG12560	Art7	0.433896	0.035748	0.372551	-0.0691524	0.364633	-0.420898	0.288141	0.483821	0.41629	0.215487	-0.0391019	-0.327499
FBgn0031974	FBgn0014073	CG12560	Tie	0.226671	-0.114114	-0.0296957	-0.332811	-0.0730204	-0.430691	0.160847	-0.0956203	-0.272518	-0.172543	-0.347221	-0.236916
FBgn0031974	FBgn0038173	CG12560	Adgf-C	0.365327	0.132437	-0.0563953	0.419357	-0.0522058	-0.58676	0.210706	0.00870827	-0.143943	0.233757	0.103133	-0.387262
FBgn0031974	FBgn0037975	CG12560	CG3397	0.655264	0.253457	0.352556	0.124521	0.543761	0.623529	0.53462	0.372065	0.466063	0.289849	0.0840092	0.540937
FBgn0031974	FBgn0032399	CG12560	CG6785	-0.520434	-0.317904	-0.612504	-0.711696	-0.434888	-0.586112	-0.337318	-0.741484	-0.871852	-0.202254	-0.587808	-0.63485
FBgn0031974	FBgn0036550	CG12560	CG17026	0.670053	0.370317	0.338146	0.593486	0.139885	0.48242	0.413814	0.383591	0.0221122	0.325706	0.511227	0.417058
FBgn0031974	FBgn0035670	CG12560	CG10472	0.542102	0.448253	0.0873133	0.4004	-0.113458	-0.446902	0.188679	0.119013	-0.280714	0.337744	0.27303	-0.387689
FBgn0031974	FBgn0039777	CG12560	Jon99Fii	0.465507	0.271702	0.280828	0.571347	-0.130535	-0.610831	0.329975	0.481516	-0.45172	0.23427	0.59609	-0.583113
FBgn0031974	FBgn0002962	CG12560	nos	-0.387102	0.189157	0.138086	0.472197	0.138703	0.124137	-0.228549	0.134124	0.220097	-0.076667	0.270042	0.68266
FBgn0031974	FBgn0037408	CG12560	NPFR	0.0359585	-0.0443597	0.177515	0.119373	0.0138596	-0.363293	-0.0933151	0.213694	0.0430291	0.0274908	0.148809	-0.176044
FBgn0031974	FBgn0039494	CG12560	grass	0.444982	0.337574	0.112426	0.387364	-0.109781	-0.0741176	0.222061	0.0556646	-0.303167	0.351063	0.374285	0.0704346
FBgn0031974	FBgn0015036	CG12560	Cyp4ae1	0.110342	0.252802	0.401745	0.510345	-0.0231216	-0.373363	0.0677879	0.416546	-0.0182703	0.247247	0.436524	-0.373943
FBgn0031974	FBgn0267828	CG12560	Fatp	0.382137	0.0218406	0.406912	0.264876	0.157444	-0.344635	0.168189	0.563562	0.167933	0.0443097	0.181764	-0.250662
FBgn0031974	FBgn0038034	CG12560	Cyp9f3	0.727522	0.452895	0.603421	0.727351	0.373355	0.697667	0.557586	0.725177	0.322718	0.354051	0.735422	0.683941
FBgn0031974	FBgn0022702	CG12560	Cht2	-0.0334424	0.20806	0.166188	0.294395	0.0678889	-0.0723996	0.0595065	0.19346	-0.0582259	0.148894	0.15931	-0.0541279
FBgn0031974	FBgn0032470	CG12560	CG5142	0.484795	0.0138429	-0.0789895	0.135026	-0.224904	-0.227135	0.156578	-0.106719	-0.46521	0.0897294	0.0424315	-0.306241
FBgn0031974	FBgn0069973	CG12560	CG40485	0.432636	0.126371	-0.319111	-0.413005	-0.00239419	-0.153046	0.275335	-0.490908	-0.229915	0.145309	-0.587125	-0.122855
FBgn0031974	FBgn0031141	CG12560	CG1304	0.661365	0.281815	0.796895	0.660784	-0.333964	-0.48553	0.317852	0.684831	-0.698369	0.240587	0.703024	-0.633057
FBgn0031974	FBgn0013771	CG12560	Cyp6a9	0.357892	0.231177	0.575049	0.75117	0.789973	0.882227	0.275677	0.782549	0.792965	0.0339793	0.810809	0.838897
FBgn0031974	FBgn0031935	CG12560	CG13793	0.857343	0.687596	0.400876	0.697073	0.456349	0.842766	0.631435	0.669513	0.57688	0.581405	0.773073	0.831384
FBgn0031974	FBgn0029906	CG12560	xit	0.554747	0.10592	0.552429	0.459511	0.0324726	-0.446139	0.489968	0.825493	-0.0614702	0.264151	0.535303	-0.329548
FBgn0031974	FBgn0035227	CG12560	Iml1	0.276476	0.275757	-0.126855	-0.286091	-0.0654977	-0.214852	0.156749	-0.140442	-0.1979	0.303936	-0.196022	-0.224451
FBgn0031974	FBgn0040725	CG12560	CG13946	0.0370103	0.0535786	0.265023	0.464127	-0.0671725	-0.116698	-0.0046465	0.359758	-0.115367	-0.0363698	0.545804	0.0712883
FBgn0031974	FBgn0260874	CG12560	Ir76a	0.133211	-0.299397	-0.187453	-0.449827	0.0942279	-0.0962155	-0.107829	-0.177666	0.461197	-0.2014	-0.357381	0.107744
FBgn0031974	FBgn0031307	CG12560	MFS3	0.0112744	0.0750091	-0.173734	0.267756	-0.227282	-0.488053	-0.130453	-0.262785	-0.460087	0.0722274	0.23333	-0.23555
FBgn0031974	FBgn0259748	CG12560	CG42397	0.591291	0.123062	0.379089	0.661172	-0.00665552	-0.262729	0.190216	0.304448	-0.0798258	0.0792282	0.55067	-0.248186
FBgn0031974	FBgn0040554	CG12560	CR17025	0.419319	-0.318458	-0.0608508	0.194261	0.761153	0.891779	0.22061	-0.12277	0.697601	-0.231111	0.108341	0.802186
FBgn0031974	FBgn0034494	CG12560	CG10444	0.404436	0.439073	0.733822	0.917757	0.343836	0.0363162	0.518398	0.808759	0.312132	0.350209	0.817126	0.144199
FBgn0031974	FBgn0015568	CG12560	alpha-Est1	0.596614	0.209922	0.0976134	0.239596	0.319815	0.314723	0.454196	0.271493	0.59037	0.287117	0.342611	0.543328
FBgn0031974	FBgn0260720	CG12560	CR42547	0.631938	0.0375491	-0.582507	-0.735557	-0.207404	-0.860926	0.345428	-0.686331	-0.455648	-0.0693247	-0.814394	-0.697857
FBgn0031974	FBgn0035666	CG12560	Jon65Aii	0.596078	0.341149	0.403293	0.846656	-0.362472	-0.505867	0.301972	0.418936	-0.648425	0.233501	0.68027	-0.576624
FBgn0031974	FBgn0031735	CG12560	CG11029	0.204891	0.160881	-0.0292129	0.0263304	-0.128765	-0.436946	0.0155383	-0.0403825	-0.243832	0.224708	0.0878511	-0.228549
FBgn0031974	FBgn0036483	CG12560	CG12316	-0.430863	0.0014577	-0.317295	-0.411328	-0.103588	-0.108835	-0.281653	-0.480748	-0.120038	-0.255699	-0.641766	-0.166311
FBgn0031974	FBgn0032147	CG12560	IP3K1	-0.135903	-0.516095	-0.571885	-0.642657	-0.172783	-0.756432	-0.107487	-0.802442	-0.305643	-0.269103	-0.905234	-0.764877
FBgn0031974	FBgn0035667	CG12560	Jon65Ai	0.563195	0.512943	0.367903	0.471741	-0.0775017	-0.267007	0.164945	0.464612	-0.215146	0.323999	0.543669	-0.3345
FBgn0031974	FBgn0029603	CG12560	CG14053	0.0542647	0.110774	0.299876	0.192489	0.361379	0.243544	0.273286	0.682746	0.601981	0.0583967	0.0171604	0.421839
FBgn0031974	FBgn0002869	CG12560	MtnB	-0.283639	-0.126484	-0.316019	-0.384354	-0.0527492	0.0373101	-0.203364	-0.545804	-0.215658	-0.0852045	-0.425339	-0.000683002
FBgn0031974	FBgn0033451	CG12560	CG1665	0.741022	0.283601	0.51872	0.768842	0.416072	0.539098	0.551268	0.682233	0.447622	0.138905	0.793648	0.519423
FBgn0031974	FBgn0033205	CG12560	CG2064	0.35056	0.213542	0.396503	0.404346	0.144689	0.0294844	0.111671	0.329036	0.139759	0.169641	0.303594	-0.0460172
FBgn0031974	FBgn0051097	CG12560	CG31097	0.364131	0.161664	-0.00604325	0.0133889	-0.162651	-0.355829	0.0991206	0.0525911	-0.404764	0.0793136	0.112012	-0.366174
FBgn0031974	FBgn0038674	CG12560	CG14285	0.570845	0.197923	-0.0486207	-0.216457	-0.0766362	-0.278172	0.315803	-0.0722274	-0.288227	0.212755	-0.321438	-0.344233
FBgn0031974	FBgn0264721	CG12560	CR43989	-0.120133	-0.129272	-0.0369758	-0.206412	0.394804	0.569928	-0.0327841	-0.0918637	0.732946	-0.0914369	-0.19679	0.642022
FBgn0031974	FBgn0051664	CG12560	CG31664	0.347726	0.194419	0.39944	0.786138	0.408878	0.873529	0.289678	0.423205	0.461538	0.147272	0.720396	0.78494
FBgn0032161	FBgn0052475	CG4594	mthl8	0.337116	0.397896	0.334411	0.26449	0.810737	0.840966	0.280372	0.486127	0.812951	0.184325	0.371894	0.677238
FBgn0032161	FBgn0261563	CG4594	wb	-0.120657	-0.00699694	0.117792	-0.207722	0.473243	0.259044	0.122172	0.165372	0.225903	0.0656535	-0.114061	0.300606
FBgn0032161	FBgn0053958	CG4594	CG33958	0.022869	-0.232362	0.360624	0.074923	-0.13616	-0.168049	-0.0974985	0.393494	-0.538291	-0.2697	0.0805088	-0.22522
FBgn0032161	FBgn0264950	CG4594	CR44119	0.186794	-0.0313381	0.27314	-0.00773652	0.793083	0.681635	-0.0607872	0.29463	0.653974	-0.086229	0.221805	0.582515
FBgn0032161	FBgn0031484	CG4594	CG3165	0.579508	0.0575325	-0.522545	-0.228508	-0.556934	-0.160829	0.467942	-0.531205	-0.686075	0.223939	-0.251601	-0.500384
FBgn0032161	FBgn0023507	CG4594	D2hgdh	-0.408789	0.102897	0.0243705	0.486495	0.6715	0.712778	-0.318706	0.0209169	0.556732	0.180398	0.409716	0.630411
FBgn0032161	FBgn0030629	CG4594	CG9123	0.108621	-0.258722	-0.521603	-0.299198	0.136179	-0.702398	-0.0916076	-0.642705	0.267481	-0.0701784	0.0221122	-0.652011
FBgn0032161	FBgn0028543	CG4594	NimB2	-0.347437	-0.263124	0.509225	0.0259439	0.413005	0.106838	-0.262956	0.42773	0.204047	0.0187825	0.092376	0.0554939
FBgn0032161	FBgn0259716	CG4594	CG42370	-0.200681	-0.330596	0.0572455	0.00883604	0.0740969	0.0179619	-0.179373	0.0980961	0.0474686	0.0217707	0.0435414	-0.205584
FBgn0032161	FBgn0052523	CG4594	CG32523	0.162969	0.108576	0.169869	-0.465897	0.185594	-0.0522514	0.0112695	0.140528	0.120806	0.133527	-0.16725	-0.00221976
FBgn0032161	FBgn0035496	CG4594	CG14990	0.202505	0.417611	-0.0937206	-0.0286554	0.196692	-0.104267	0.17519	-0.152566	0.0472979	0.354478	0.04209	-0.120038
FBgn0032161	FBgn0052553	CG4594	CR32553	0.0938448	0.224599	-0.168587	-0.167812	0.187488	0.165554	0.0887049	-0.350551	0.30829	0.24571	-0.095791	0.410826
FBgn0032161	FBgn0085732	CG4594	CR40190	-0.0873682	-0.000723398	0.0256493	0.00598432	0.689774	0.582215	-0.21728	-0.0212584	0.762401	-0.170409	0.0816187	0.665756
FBgn0032161	FBgn0004426	CG4594	LysC	-0.040495	0.114605	0.24255	0.628406	0.271965	0.684288	-0.033396	0.505934	0.558952	0.133128	0.548963	0.632374
FBgn0032161	FBgn0053282	CG4594	CG33282	0.3405	0.46201	0.448021	0.6644	0.754008	0.806713	0.379322	0.306412	0.525741	0.470674	0.624605	0.586357
FBgn0032161	FBgn0262887	CG4594	CR43242	0.0395816	0.291518	-0.192541	-0.127202	0.0528879	-0.109863	-0.0597627	-0.511654	-0.0761547	0.237087	-0.0478955	-0.0761547
FBgn0032161	FBgn0261429	CG4594	CR42646	0.183063	0.325601	0.325487	0.484164	0.67558	0.530636	-0.00589089	0.343465	0.730727	0.0214292	0.347136	0.613677
FBgn0032161	FBgn0030628	CG4594	CG9114	0.084876	-0.444254	0.457137	-0.0579396	-0.398124	0.310997	0.094425	0.365235	-0.350978	-0.121916	0.0157944	-0.00742764
FBgn0032161	FBgn0035767	CG4594	Cln7	-0.393966	-0.114115	0.435386	0.201462	0.479222	0.0104483	-0.251686	0.168275	0.217621	0.00452489	0.221976	0.0236489
FBgn0032161	FBgn0030773	CG4594	CG9676	0.240378	0.0547983	-0.167411	-0.514613	0.41358	0.194955	0.0445659	-0.295057	0.307522	0.151712	-0.323572	0.136515
FBgn0032161	FBgn0004872	CG4594	piwi	0.513676	-0.0799886	-0.398778	-0.552686	-0.419036	0.313706	0.238624	-0.326133	-0.41296	0.182703	-0.316827	-0.144284
FBgn0032161	FBgn0031726	CG4594	Cyp6a16	-0.369628	-0.35464	-0.169389	0.129021	0.0307445	-0.377892	-0.349612	-0.398446	-0.21378	-0.0799966	-0.0878511	-0.520874
FBgn0032161	FBgn0039612	CG4594	CG14523	-0.229457	-0.030294	0.205217	0.259415	0.131977	0.0839789	-0.203961	0.188594	-0.0428584	0.0991206	0.14104	-0.0387604
FBgn0032161	FBgn0039525	CG4594	CG5646	-0.422837	-0.459264	0.347583	-0.486774	0.37813	0.0150609	-0.34594	0.105865	0.221378	-0.180398	-0.244685	-0.010245
FBgn0032161	FBgn0263763	CG4594	CG43680	-0.0924541	0.181014	0.604256	0.633736	0.0231567	-0.19604	0.0121233	0.468881	-0.0786306	0.29924	0.534876	-0.123879
FBgn0032161	FBgn0037225	CG4594	TwdlG	0.180809	-0.198179	0.212034	-0.207069	0.0837981	0.23775	0.0608725	-0.00478101	0.0932297	0.0169897	-0.0322718	0.290703
FBgn0032161	FBgn0039886	CG4594	CG2003	0.196668	0.186768	0.20963	0.430688	-0.0678146	-0.0663949	0.119098	0.185947	-0.249723	0.215402	0.303936	-0.352941
FBgn0032161	FBgn0036787	CG4594	CG4306	0.140302	0.26177	-0.0378269	0.185897	0.135161	0.198036	-0.0017075	-0.149492	0.0850337	0.191924	0.209852	0.127977
FBgn0032161	FBgn0030993	CG4594	Mec2	-0.385535	-0.242871	0.2288	0.152133	0.272617	0.138727	-0.266285	0.129002	0.133271	-0.0411509	0.0722274	0.0715444
FBgn0032161	FBgn0037230	CG4594	CG9780	-0.379177	-0.284966	0.181591	0.470142	0.18897	0.229764	-0.229489	0.206693	0.160505	0.0559208	0.358405	0.100999
FBgn0032161	FBgn0050428	CG4594	CG30428	0.399413	0.694538	0.365764	0.536908	0.485652	0.397305	0.22411	0.340562	0.41646	0.474089	0.45283	0.260229
FBgn0032161	FBgn0267408	CG4594	AOX1	-0.425152	-0.105383	-0.329221	0.26757	0.00434504	0.218085	-0.238538	-0.157773	-0.127977	0.0933151	0.231623	0.131649
FBgn0032161	FBgn0261509	CG4594	haf	-0.3285	-0.290557	-0.0791658	-0.24395	0.39463	0.228542	-0.18663	0.0429437	0.380603	-0.108939	-0.249637	0.168104
FBgn0032161	FBgn0262007	CG4594	CG42825	-0.332916	0.110609	-0.0418951	0.578292	-0.00597775	0.0950844	-0.312046	0.000939127	-0.276616	0.09101	0.429181	-0.0120379
FBgn0032161	FBgn0030600	CG4594	hiw	-0.496826	-0.344963	-0.333922	-0.0591508	0.578148	0.719509	-0.3345	-0.350124	0.329548	-0.167677	-0.096474	0.469734
FBgn0032161	FBgn0037000	CG4594	ZnT77C	0.0613496	0.307264	0.374981	0.304766	0.0277244	-0.108409	0.246308	0.302314	0.0673611	0.388116	0.213865	-0.0858021
FBgn0032161	FBgn0040342	CG4594	CG3706	0.254004	0.397311	0.0558202	0.182951	0.00488142	-0.064266	0.260651	-8.54e-05	-0.161871	0.357893	0.212328	-0.164177
FBgn0032161	FBgn0030367	CG4594	Cyp311a1	-0.335827	-0.251565	0.457452	0.309862	0.153962	-0.0370824	-0.189277	0.255357	-0.0512251	0.0514813	0.258858	-0.0984376
FBgn0032161	FBgn0027934	CG4594	alpha-Est4aPsi	0.100951	0.228362	0.639691	0.71705	0.296109	-0.339866	0.112183	0.38103	0.088278	0.263383	0.577393	-0.26842
FBgn0032161	FBgn0035243	CG4594	CG13926	0.0299901	0.018274	0.239242	0.185146	-0.224793	0.0272843	-0.00520789	0.307948	-0.326048	0.115	0.225134	-0.339281
FBgn0032161	FBgn0034817	CG4594	Art7	-0.219603	-0.433344	0.107555	-0.13315	0.0542329	0.387902	-0.00956203	0.218304	-0.113464	-0.0444805	-0.0673611	0.220439
FBgn0032161	FBgn0014073	CG4594	Tie	-0.0707425	-0.101498	-0.195758	-0.342526	0.212539	-0.267669	-0.323487	-0.28319	0.0250149	-0.200461	-0.311107	-0.236148
FBgn0032161	FBgn0038173	CG4594	Adgf-C	-0.360029	-0.00645871	0.268548	0.275891	0.484586	0.0738252	-0.270127	0.199351	0.173568	-0.0329548	0.111671	0.142064
FBgn0032161	FBgn0037975	CG4594	CG3397	0.335269	0.574824	0.452645	0.724088	0.103346	0.275884	0.323401	0.314864	0.174678	0.53462	0.621446	0.297703
FBgn0032161	FBgn0032399	CG4594	CG6785	0.403295	-0.00378078	0.261784	-0.00620961	0.61007	0.723513	0.18091	0.238368	0.643644	-0.178263	0.188252	0.585503
FBgn0032161	FBgn0036550	CG4594	CG17026	0.0687529	0.590808	0.291717	0.477595	0.633529	0.322201	0.0729958	0.259541	0.346453	0.45155	0.313925	0.287629
FBgn0032161	FBgn0035670	CG4594	CG10472	-0.256875	0.263566	0.0566969	0.363357	0.373834	0.386076	-0.264919	0.0481516	0.149321	0.220695	0.16153	0.213694
FBgn0032161	FBgn0039777	CG4594	Jon99Fii	-0.1522	-0.000926788	-0.163484	0.135597	0.445665	0.523145	-0.106292	-0.277384	0.343208	-0.0593358	-0.0499445	0.294374
FBgn0032161	FBgn0002962	CG4594	nos	0.316255	-0.0317611	0.039573	-0.554794	-0.207259	0.2506	0.167079	0.0419192	-0.143516	-0.171604	-0.0700077	-0.417912
FBgn0032161	FBgn0037408	CG4594	NPFR	-0.258278	0.26185	0.277785	0.4321	0.0298617	0.163926	-0.177495	0.0828993	-0.127807	0.276786	0.227696	0.127124
FBgn0032161	FBgn0039494	CG4594	grass	-0.144361	-0.0523634	0.414489	0.590223	0.624591	0.35897	-0.152224	0.237087	0.401349	0.197644	0.392299	0.392982
FBgn0032161	FBgn0015036	CG4594	Cyp4ae1	-0.32078	0.316028	-0.125703	0.442063	0.25683	0.422693	-0.0805088	-0.0548109	0.139332	0.290788	0.336891	0.365577
FBgn0032161	FBgn0267828	CG4594	Fatp	-0.202101	-0.1256	0.229443	0.561698	0.261836	0.714215	-0.122343	0.169299	0.104755	0.153163	0.284299	0.418339
FBgn0032161	FBgn0038034	CG4594	Cyp9f3	0.166189	0.577516	0.226322	0.489809	0.252113	0.113078	0.06258	0.0754717	0.156237	0.450525	0.374883	0.119781
FBgn0032161	FBgn0022702	CG4594	Cht2	0.367739	-0.0375019	0.380828	0.551823	-0.135207	0.506275	0.37326	0.333817	0.00734227	0.210877	0.306668	0.277896
FBgn0032161	FBgn0032470	CG4594	CG5142	0.0258238	-0.0306033	0.662149	0.537582	0.907221	0.737168	-0.148297	0.39819	0.634423	-0.0380774	0.422949	0.539657
FBgn0032161	FBgn0069973	CG4594	CG40485	0.248312	0.247059	0.519201	-0.0679967	0.430784	0.100149	0.187142	0.502348	0.408264	0.199437	0.00221976	0.2446
FBgn0032161	FBgn0031141	CG4594	CG1304	0.125846	0.465334	0.0962479	0.301304	0.816291	0.793539	0.0534449	0.148702	0.695979	0.383506	0.329177	0.696235
FBgn0032161	FBgn0013771	CG4594	Cyp6a9	-0.218122	0.191747	-0.24052	-0.169876	-0.259379	-0.474293	-0.154017	-0.422437	-0.578759	0.0233928	-0.207462	-0.522923
FBgn0032161	FBgn0031935	CG4594	CG13793	-0.231793	0.296514	-0.255706	-0.217915	0.0177814	-0.135579	-0.241783	-0.484163	-0.261419	0.121574	-0.304704	-0.292581
FBgn0032161	FBgn0029906	CG4594	xit	0.261664	-0.234417	0.0186029	0.212124	0.619642	0.583814	0.249808	-0.0637753	0.491078	-0.0118672	0.0972424	0.403996
FBgn0032161	FBgn0035227	CG4594	Iml1	-0.394911	-0.169403	-0.176336	0.104043	-0.050148	0.0796458	-0.197217	-0.0589943	-0.203449	0.0693247	0.1296	0.0360283
FBgn0032161	FBgn0040725	CG4594	CG13946	0.114353	0.07716	0.126746	-0.0280229	-0.0124702	-0.443635	-0.0175535	-0.0618761	0.0256607	-0.202681	-0.165884	0.0267224
FBgn0032161	FBgn0260874	CG4594	Ir76a	-0.164612	-0.163208	0.56893	0.333041	-0.345417	-0.515348	-0.0934005	0.312644	-0.705455	-0.0384189	0.198583	-0.625715
FBgn0032161	FBgn0031307	CG4594	MFS3	-0.392834	0.0222506	-0.0937762	0.291556	0.352542	0.113093	-0.354649	-0.0705199	0.0724836	0.102792	0.123879	-0.0381627
FBgn0032161	FBgn0259748	CG4594	CG42397	-0.196652	0.108152	0.104166	0.389274	0.540746	0.446659	-0.303594	-0.0360283	0.267737	0.0548963	0.17869	0.421241
FBgn0032161	FBgn0040554	CG4594	CR17025	0.359639	0.228426	0.446505	0.615212	-0.135011	-0.232315	0.192948	0.246308	-0.32989	0.107231	0.317084	-0.460429
FBgn0032161	FBgn0034494	CG4594	CG10444	0.459569	0.385656	0.041987	0.0909593	-0.097252	0.277218	0.342525	-0.195595	-0.0435414	0.259797	-0.00759839	0.178093
FBgn0032161	FBgn0015568	CG4594	alpha-Est1	-0.283935	-0.17515	0.452	0.325611	-0.110473	-0.102506	-0.141381	0.336976	-0.43234	0.130624	0.178178	-0.286007
FBgn0032161	FBgn0260720	CG4594	CR42547	0.103553	-0.112786	0.190745	-0.0856441	0.485425	0.47359	-0.00572014	0.110646	0.202595	-0.263041	0.0449927	0.436182
FBgn0032161	FBgn0035666	CG4594	Jon65Aii	-0.0217042	-0.00362668	-0.168071	0.00265669	0.633643	0.403692	-0.179032	-0.254247	0.374968	-0.0624093	-0.144711	0.336976
FBgn0032161	FBgn0031735	CG4594	CG11029	-0.157896	-0.267942	0.404298	0.083022	0.409093	0.189547	-0.0379066	0.358747	0.209511	-0.0610433	0.0702638	0.124904
FBgn0032161	FBgn0036483	CG4594	CG12316	-0.122529	-0.465248	-0.292652	-0.308135	-0.220541	0.193067	-0.124648	-0.273201	-0.141808	-0.470247	-0.144113	-0.375566
FBgn0032161	FBgn0032147	CG4594	IP3K1	0.0235093	0.426167	0.16895	0.100936	0.324175	0.431432	-0.0781183	0.228293	0.213353	0.276786	0.193631	0.575088
FBgn0032161	FBgn0035667	CG4594	Jon65Ai	-0.0744185	0.150293	0.250923	0.302908	0.690524	0.550053	-0.181337	0.140101	0.332195	0.050286	0.216597	0.350295
FBgn0032161	FBgn0029603	CG4594	CG14053	0.0374044	0.0429289	-0.14343	0.278499	-0.0411336	-0.078064	0.0817041	-0.416716	-0.301887	0.0243319	0.155554	0.0418339
FBgn0032161	FBgn0002869	CG4594	MtnB	0.0861211	0.294443	-0.0513703	-0.264197	0.234466	0.0180657	-0.0123794	-0.099889	0.0215999	0.244515	-0.214804	-0.00700077
FBgn0032161	FBgn0033451	CG4594	CG1665	0.268219	-0.0652641	0.270614	0.235799	0.205019	0.385606	0.231794	0.255528	0.210706	0.191497	0.237172	0.226244
FBgn0032161	FBgn0033205	CG4594	CG2064	0.114872	0.424882	0.38689	0.694166	0.28323	0.10055	0.144967	0.588748	0.33117	0.311193	0.563733	0.146845
FBgn0032161	FBgn0051097	CG4594	CG31097	-0.102183	0.271944	0.316665	0.297662	0.81615	0.824685	-0.199693	0.0825578	0.539145	0.12405	0.189789	0.647486
FBgn0032161	FBgn0038674	CG4594	CG14285	0.233281	0.436795	0.694361	0.26623	0.708548	0.802259	0.0721421	0.502689	0.562452	0.369675	0.277469	0.620763
FBgn0032161	FBgn0264721	CG4594	CR43989	0.0188531	0.308076	-0.315727	-0.10649	-0.428155	-0.618889	-0.0200632	-0.229318	-0.75096	0.176471	-0.170665	-0.607957
FBgn0032161	FBgn0051664	CG4594	CG31664	-0.326729	0.532484	-0.264697	0.13174	0.174837	-0.0281636	-0.223085	-0.224025	0.0778622	0.419619	0.128917	-0.20029
FBgn0052475	FBgn0261563	mthl8	wb	0.0482959	0.0581726	0.550691	0.543871	0.410641	0.188572	-0.110219	0.496798	0.230044	-0.0691539	0.611201	0.328917
FBgn0052475	FBgn0053958	mthl8	CG33958	0.309573	0.0815448	0.771859	0.551818	-0.135548	-0.286662	0.137539	0.429694	-0.579523	-0.0507129	0.432682	-0.420207
FBgn0052475	FBgn0264950	mthl8	CR44119	0.154753	0.216374	0.57967	0.697581	0.763149	0.609404	0.163835	0.493042	0.672997	0.126441	0.715957	0.638858
FBgn0052475	FBgn0031484	mthl8	CG3165	0.355559	-0.415094	-0.253077	0.0270068	-0.44834	-0.310608	0.229915	-0.393238	-0.843452	-0.236233	-0.0741057	-0.667066
FBgn0052475	FBgn0023507	mthl8	D2hgdh	-0.550723	-0.0432279	-0.0841171	-0.178293	0.653822	0.45232	-0.490139	-0.115598	0.543838	-0.218048	-0.12516	0.369263
FBgn0052475	FBgn0030629	mthl8	CG9123	0.374186	-0.490193	-0.435406	0.293278	0.169041	-0.624431	0.617263	-0.434133	0.131558	-0.354051	0.360625	-0.798359
FBgn0052475	FBgn0028543	mthl8	NimB2	-0.565462	-0.416485	-0.0214013	-0.109631	0.33233	0.0806906	-0.69282	0.231964	0.159531	-0.433279	0.0205754	-0.162493
FBgn0052475	FBgn0259716	mthl8	CG42370	-0.542676	-0.548596	-0.0228366	0.0420385	0.108275	-0.201718	-0.70981	0.174251	0.0867913	-0.581235	0.103304	-0.424054
FBgn0052475	FBgn0052523	mthl8	CG32523	0.105126	0.312535	0.402613	0.195005	0.194789	-0.241451	-0.0502006	0.311705	0.0639582	0.287715	0.288739	-0.227285
FBgn0052475	FBgn0035496	mthl8	CG14990	-0.0402723	0.262474	0.354241	-0.279126	0.160864	-0.34314	-0.246308	0.0620678	0.0610024	0.181081	-0.270298	-0.506796
FBgn0052475	FBgn0052553	mthl8	CR32553	0.265772	0.129121	-0.503168	-0.397922	0.213329	0.313024	0.267993	-0.470161	0.160645	0.0502006	-0.24921	0.575947
FBgn0052475	FBgn0085732	mthl8	CR40190	-0.262095	0.450382	0.048105	0.515332	0.69532	0.504624	-0.294374	0.136686	0.804169	0.122513	0.396141	0.673904
FBgn0052475	FBgn0004426	mthl8	LysC	-0.31987	-0.318447	0.774451	0.345636	0.393436	0.554194	-0.657414	0.536327	0.692531	-0.436019	0.408691	0.542013
FBgn0052475	FBgn0053282	mthl8	CG33282	0.278119	0.816553	0.588746	0.294406	0.646798	0.76228	0.342696	0.357125	0.530644	0.622898	0.45283	0.544491
FBgn0052475	FBgn0262887	mthl8	CR43242	0.309743	0.37351	-0.117241	0.146556	0.0312299	-0.0686569	0.459063	-0.263468	-0.130273	0.389653	0.0208316	-0.0631678
FBgn0052475	FBgn0261429	mthl8	CR42646	0.0668603	0.361667	-0.132381	-0.0990541	0.682028	0.585932	-0.0278323	-0.0485785	0.795216	-0.043456	0.0991206	0.620908
FBgn0052475	FBgn0030628	mthl8	CG9114	-0.187	-0.744247	0.0598765	0.361229	-0.316047	0.0765075	-0.0895586	0.0289422	-0.550778	-0.467429	0.341586	-0.245491
FBgn0052475	FBgn0035767	mthl8	Cln7	-0.479606	-0.33654	0.0623864	0.153076	0.430401	0.119786	-0.550158	0.0949372	0.326517	-0.311961	0.10006	-0.105565
FBgn0052475	FBgn0030773	mthl8	CG9676	0.233978	0.377748	-0.198347	-0.32832	0.369563	-0.115007	0.148126	-0.0799112	0.28899	0.341757	-0.306412	0.037952
FBgn0052475	FBgn0004872	mthl8	piwi	0.640982	-0.260786	-0.486461	-0.359424	-0.253181	0.139715	0.611543	-0.539401	-0.40851	0.483821	-0.223598	-0.286264
FBgn0052475	FBgn0031726	mthl8	Cyp6a16	-0.530052	-0.525616	-0.569465	-0.625206	0.0450648	-0.261215	-0.594724	-0.416887	-0.297601	-0.491164	-0.649193	-0.627917
FBgn0052475	FBgn0039612	mthl8	CG14523	-0.516269	-0.37827	-0.19216	-0.416929	0.115968	-0.0717617	-0.621788	-0.158371	-0.0858488	-0.341416	-0.359003	-0.480041
FBgn0052475	FBgn0039525	mthl8	CG5646	-0.482982	-0.469941	0.220604	-0.119437	0.334433	0.156507	-0.513361	0.157603	0.312252	-0.390762	-0.124562	0.0446192
FBgn0052475	FBgn0263763	mthl8	CG43680	-0.357064	-0.189668	0.787599	0.620726	0.0190411	-0.18187	-0.656365	0.372151	-0.0410824	-0.464783	0.446342	-0.357552
FBgn0052475	FBgn0037225	mthl8	TwdlG	0.0247639	0.470119	0.368295	0.0950235	0.132579	0.0922715	-0.127209	0.0972424	0.174868	0.398275	0.222317	0.248825
FBgn0052475	FBgn0039886	mthl8	CG2003	0.0509724	-0.00155933	-0.0498214	-0.329355	-0.0459455	-0.031755	0.0932297	-0.123879	-0.263415	0.0610433	-0.339964	-0.328233
FBgn0052475	FBgn0036787	mthl8	CG4306	-0.124829	0.0289125	-0.220133	-0.222089	0.124173	0.18102	-0.0996329	-0.0933151	0.0498643	0.0863997	-0.167848	0.186084
FBgn0052475	FBgn0030993	mthl8	Mec2	-0.602458	-0.419959	0.0782295	-0.168043	0.288396	0.0642562	-0.659267	0.172116	0.182664	-0.403996	-0.0140869	-0.162664
FBgn0052475	FBgn0037230	mthl8	CG9780	-0.521047	-0.34572	0.0346403	0.0623213	0.217373	-0.00674868	-0.546572	0.195168	0.170541	-0.3561	0.106634	-0.260108
FBgn0052475	FBgn0050428	mthl8	CG30428	-0.0916242	0.338957	0.500232	0.241377	0.477215	0.417146	-0.302741	0.351575	0.327417	-0.0155383	0.335354	0.336874
FBgn0052475	FBgn0267408	mthl8	AOX1	-0.403377	-0.18774	-0.40259	-0.107144	0.0627004	0.0962664	-0.434987	-0.110305	-0.0718406	-0.307351	-0.087595	-0.158988
FBgn0052475	FBgn0261509	mthl8	haf	-0.285459	-0.262642	0.472055	0.444486	0.359739	0.101625	-0.676001	0.46077	0.388076	-0.375395	0.322804	0.107274
FBgn0052475	FBgn0262007	mthl8	CG42825	-0.569857	-0.215447	-0.418992	-0.171786	0.0104554	0.0812438	-0.58704	0.011611	-0.369955	-0.291044	-0.0125502	-0.301821
FBgn0052475	FBgn0030600	mthl8	hiw	-0.485727	0.409553	-0.211066	-0.150775	0.553437	0.621636	-0.231025	-0.225476	0.432928	0.294459	-0.25143	0.4485
FBgn0052475	FBgn0037000	mthl8	ZnT77C	-0.0067955	0.21602	0.640025	0.330027	0.118133	-0.167772	-0.320755	0.270127	0.114122	0.0431999	0.139674	-0.2319
FBgn0052475	FBgn0040342	mthl8	CG3706	0.291191	0.455488	-0.338687	-0.346496	0.0503233	-0.118795	0.211474	-0.353027	-0.200614	0.40152	-0.421583	-0.367126
FBgn0052475	FBgn0030367	mthl8	Cyp311a1	-0.321021	-0.420942	0.209368	-0.204767	0.170905	-0.324373	-0.38009	0.092376	0.0430101	-0.34688	-0.0764962	-0.495855
FBgn0052475	FBgn0027934	mthl8	alpha-Est4aPsi	0.220392	0.601031	0.521372	0.391631	0.23606	-0.210198	0.11039	0.325109	0.101057	0.357381	0.376846	-0.402599
FBgn0052475	FBgn0035243	mthl8	CG13926	-0.61344	-0.568202	0.354996	0.164441	-0.208631	-0.20784	-0.775975	0.221378	-0.500185	-0.657218	0.404508	-0.495769
FBgn0052475	FBgn0034817	mthl8	Art7	-0.269254	-0.659387	-0.10676	-0.282447	0.0941341	0.211644	-0.405532	-0.10134	-0.262473	-0.592419	-0.0216853	0.107531
FBgn0052475	FBgn0014073	mthl8	Tie	0.239231	0.418226	0.0510049	0.160923	0.26663	-0.18814	0.325194	0.0542133	0.0758246	0.429523	0.0640314	-0.116677
FBgn0052475	FBgn0038173	mthl8	Adgf-C	-0.247145	-0.207465	0.411143	-0.207915	0.383824	0.156186	-0.145479	0.181764	0.224132	-0.230684	0.050286	0.212326
FBgn0052475	FBgn0037975	mthl8	CG3397	-0.0792855	-0.172596	-0.147683	0.119969	0.0840904	0.142282	-0.0655682	-0.0963033	0.0820362	-0.302058	0.196022	0.0893239
FBgn0052475	FBgn0032399	mthl8	CG6785	0.367744	0.298201	0.615391	0.602781	0.485987	0.703607	0.324938	0.559037	0.716349	0.0284299	0.504994	0.673904
FBgn0052475	FBgn0036550	mthl8	CG17026	0.0575985	0.402954	0.0606972	-0.364423	0.488198	0.335847	0.0858021	-0.0209169	0.387434	0.345599	-0.310424	0.308659
FBgn0052475	FBgn0035670	mthl8	CG10472	-0.356471	-0.270617	0.0805137	-0.236817	0.315196	0.383037	-0.512337	0.0365406	0.276181	-0.269786	-0.150175	0.165826
FBgn0052475	FBgn0039777	mthl8	Jon99Fii	0.210772	0.0648217	-0.100953	-0.527187	0.370587	0.523856	0.265517	-0.198924	0.455376	0.0906685	-0.65406	0.431405
FBgn0052475	FBgn0002962	mthl8	nos	0.508116	-0.202706	-0.441535	-0.235394	-0.139508	0.133292	0.587211	-0.30146	-0.222847	0.269956	-0.221036	-0.487649
FBgn0052475	FBgn0037408	mthl8	NPFR	-0.12737	0.0210746	0.0517201	-0.338594	-0.00482283	-0.0834067	-0.33322	-0.00145138	-0.116222	-0.109963	-0.173141	-0.0060689
FBgn0052475	FBgn0039494	mthl8	grass	-0.441623	-0.472115	0.299541	-0.243917	0.635431	0.251319	-0.49953	0.19235	0.493545	-0.490908	-0.193033	0.171895
FBgn0052475	FBgn0015036	mthl8	Cyp4ae1	-0.426587	0.0111732	-0.196057	-0.155092	0.272924	0.337106	-0.265175	-0.175958	0.132714	-0.107744	-0.184325	0.118044
FBgn0052475	FBgn0267828	mthl8	Fatp	-0.277657	-0.390334	-0.0669027	0.139875	0.266396	0.66951	-0.365833	-0.122343	0.154691	-0.214292	0.111244	0.325669
FBgn0052475	FBgn0038034	mthl8	Cyp9f3	0.0486685	0.518182	-0.215345	-0.344848	0.238239	0.0335478	0.188082	-0.261504	0.185877	0.3596	-0.40263	-0.0161552
FBgn0052475	FBgn0022702	mthl8	Cht2	0.300003	-0.545325	0.0473399	-0.219192	-0.0182712	0.20811	0.0799112	-0.123709	0.016193	-0.35149	-0.0945957	-0.0977007
FBgn0052475	FBgn0032470	mthl8	CG5142	0.14383	0.492697	0.206014	0.100504	0.795508	0.701806	0.00332963	0.164433	0.676895	0.30257	0.236319	0.689119
FBgn0052475	FBgn0069973	mthl8	CG40485	-0.179901	-0.0505818	0.785744	0.635498	0.465613	0.479347	-0.285666	0.599676	0.521904	-0.0299667	0.555195	0.388324
FBgn0052475	FBgn0031141	mthl8	CG1304	-0.316728	-0.0466337	-0.206242	-0.0524271	0.782992	0.700845	-0.378127	-0.209771	0.783906	-0.307009	-0.259993	0.698607
FBgn0052475	FBgn0013771	mthl8	Cyp6a9	0.133212	0.149971	-0.228049	-0.381596	-0.184129	-0.345561	0.231794	-0.453086	-0.591003	0.165457	-0.66661	-0.661681
FBgn0052475	FBgn0031935	mthl8	CG13793	-0.0979931	0.123853	-0.171381	-0.476977	0.0278825	-0.176881	-0.151712	-0.482541	-0.273825	-0.0117818	-0.649791	-0.467562
FBgn0052475	FBgn0029906	mthl8	xit	0.0152982	-0.48853	-0.300469	-0.471174	0.394461	0.448768	0.0844361	-0.490908	0.274982	-0.458038	-0.380005	0.338234
FBgn0052475	FBgn0035227	mthl8	Iml1	-0.493062	-0.66521	-0.149282	0.0970761	0.0324345	-0.145028	-0.651669	-0.107914	-0.19286	-0.587467	0.131563	-0.243183
FBgn0052475	FBgn0040725	mthl8	CG13946	0.489054	0.396095	-0.181554	-0.34448	0.0580827	-0.41929	0.603529	-0.303038	0.0351781	0.370016	-0.656621	-0.138046
FBgn0052475	FBgn0260874	mthl8	Ir76a	-0.466761	-0.0964652	0.711868	0.727848	-0.276524	-0.379814	-0.637411	0.34133	-0.7645	-0.158456	0.453086	-0.663732
FBgn0052475	FBgn0031307	mthl8	MFS3	-0.380595	0.0322291	0.209923	-0.409968	0.32604	0.0612356	-0.322462	0.208316	0.197786	-0.0701784	-0.32767	-0.0907771
FBgn0052475	FBgn0259748	mthl8	CG42397	-0.0995446	0.364913	-0.125391	-0.336811	0.369098	0.482334	-0.146931	-0.0660804	0.362373	0.282848	-0.283873	0.410035
FBgn0052475	FBgn0040554	mthl8	CR17025	0.23845	0.428873	0.60965	0.00712663	-0.0771204	-0.119902	0.161188	0.315632	-0.385077	0.364808	0.185606	-0.420036
FBgn0052475	FBgn0034494	mthl8	CG10444	0.295115	0.138796	-0.273076	-0.327945	-0.140452	0.0106502	0.302484	-0.522069	-0.131558	0.153932	-0.440878	-0.0506027
FBgn0052475	FBgn0015568	mthl8	alpha-Est1	0.0986194	-0.310476	0.102481	-0.326227	-0.100809	-0.259367	0.0518228	0.0082814	-0.538654	-0.255528	-0.333134	-0.591248
FBgn0052475	FBgn0260720	mthl8	CR42547	0.248174	0.453912	0.388868	0.629587	0.499041	0.406522	0.260394	0.4857	0.363101	0.440195	0.655938	0.590649
FBgn0052475	FBgn0035666	mthl8	Jon65Aii	0.0281986	0.0609814	-0.167102	-0.581467	0.442773	0.487592	-0.0772646	-0.306241	0.535013	0.0254418	-0.557671	0.380973
FBgn0052475	FBgn0031735	mthl8	CG11029	-0.364554	-0.399852	0.615766	-0.275498	0.45429	0.186137	-0.469137	0.296167	0.396687	-0.353283	-0.0767523	0.00239337
FBgn0052475	FBgn0036483	mthl8	CG12316	0.180555	-0.497871	-0.0188746	0.455126	-0.151273	-0.0395303	0.314864	-0.0623239	-0.230215	-0.394519	0.476906	-0.514745
FBgn0052475	FBgn0032147	mthl8	IP3K1	0.193391	0.140031	0.584841	0.591896	0.307721	0.368195	0.406301	0.549133	0.101271	-0.033211	0.681807	0.530388
FBgn0052475	FBgn0035667	mthl8	Jon65Ai	-0.0733246	-0.0535421	-0.0328419	-0.332802	0.486068	0.563008	-0.192948	-0.0877657	0.477523	-0.103646	-0.413814	0.330456
FBgn0052475	FBgn0029603	mthl8	CG14053	0.572262	-0.157391	-0.427421	0.0458497	-0.0308457	0.184223	0.664817	-0.582771	-0.363016	-0.057799	0.0240758	0.16463
FBgn0052475	FBgn0002869	mthl8	MtnB	0.435571	0.667813	0.253608	0.309734	0.19957	-0.150061	0.430035	0.255272	0.0620733	0.543926	0.269103	-0.0123088
FBgn0052475	FBgn0033451	mthl8	CG1665	0.057258	-0.142036	-0.0954945	-0.556381	0.172639	0.208093	0.0219414	-0.24127	0.0648579	0.0645437	-0.460855	0.107873
FBgn0052475	FBgn0033205	mthl8	CG2064	-0.405114	-0.204933	0.00489834	-0.20953	0.244893	0.200548	-0.451037	0.212157	0.326046	-0.283446	0.0833262	0.0855629
FBgn0052475	FBgn0051097	mthl8	CG31097	-0.297459	0.163029	0.373208	0.0686137	0.69478	0.743896	-0.313498	0.200546	0.648878	0.00520789	0.0567745	0.631507
FBgn0052475	FBgn0038674	mthl8	CG14285	-0.207559	-0.168448	0.5345	0.53843	0.60833	0.843049	-0.320242	0.376505	0.526488	-0.231964	0.441731	0.656552
FBgn0052475	FBgn0264721	mthl8	CR43989	0.362291	0.622085	0.0116429	0.124614	-0.409636	-0.598108	0.5289	-0.0406386	-0.727659	0.542047	0.053018	-0.592017
FBgn0052475	FBgn0051664	mthl8	CG31664	0.00719251	0.415048	-0.436742	-0.374315	0.139795	-0.197472	0.0545548	-0.240502	-0.0560759	0.37326	-0.47332	-0.427045
FBgn0261563	FBgn0053958	wb	CG33958	0.338706	0.0931915	0.695193	0.805424	0.0989266	-0.386885	0.00554939	0.743789	-0.197644	-0.139503	0.645693	-0.173739
FBgn0261563	FBgn0264950	wb	CR44119	0.00508782	0.556817	0.816399	0.790973	0.364385	0.525261	0.0801673	0.75779	0.189106	0.194656	0.723384	0.346965
FBgn0261563	FBgn0031484	wb	CG3165	0.0316109	0.282352	0.139416	0.285564	-0.422389	-0.38392	0.00572014	-0.153334	-0.321779	0.275677	0.213865	-0.257065
FBgn0261563	FBgn0023507	wb	D2hgdh	-0.152218	0.114109	0.0787237	-0.361879	0.545657	0.363093	0.117391	-0.0291983	0.457953	0.191667	-0.394177	0.30718
FBgn0261563	FBgn0030629	wb	CG9123	-0.416144	-0.00688894	0.085079	0.428968	-0.0737593	-0.383273	-0.301545	-0.0840946	-0.127551	0.157944	0.228208	-0.198497
FBgn0261563	FBgn0028543	wb	NimB2	0.143627	0.413833	-0.214302	-0.167104	0.750267	0.155569	0.404337	-0.0973278	0.641168	0.494323	-0.16153	0.168872
FBgn0261563	FBgn0259716	wb	CG42370	-0.0154871	0.117303	0.269211	0.113446	0.128815	-0.392031	0.202852	0.346709	0.234013	0.162298	0.12183	-0.284385
FBgn0261563	FBgn0052523	wb	CG32523	0.513454	-0.340323	0.650258	0.46916	0.664602	-0.186503	0.345087	0.571416	0.355417	-0.215316	0.323657	0.1296
FBgn0261563	FBgn0035496	wb	CG14990	0.550082	-0.159112	0.400112	-0.073554	0.550737	-0.670006	0.455391	0.257577	0.237087	-0.107402	-0.295142	-0.33322
FBgn0261563	FBgn0052553	wb	CR32553	0.0534727	-0.175244	-0.169241	-0.273082	0.493828	-0.231088	0.394434	-0.350465	0.558781	0.0829847	-0.338001	0.33894
FBgn0261563	FBgn0085732	wb	CR40190	-0.0596363	0.435957	0.37269	0.679691	0.154954	0.600139	-0.142491	0.237514	0.059848	0.21045	0.508409	0.359771
FBgn0261563	FBgn0004426	wb	LysC	0.42704	0.142224	0.251751	-0.200595	-0.00412839	0.147391	0.0275026	0.380603	0.0717152	0.287392	-0.0449074	0.139759
FBgn0261563	FBgn0053282	wb	CG33282	0.251987	-0.226015	0.374963	0.205167	0.579639	0.338056	0.403056	0.413899	0.466661	-0.120721	0.317852	0.333476
FBgn0261563	FBgn0262887	wb	CR43242	0.17535	-0.303186	0.224365	0.331369	0.500818	-0.701873	0.137796	0.119696	0.135576	-0.271237	0.150687	-0.280287
FBgn0261563	FBgn0261429	wb	CR42646	0.174267	0.320175	-0.400514	-0.344613	0.1452	0.438546	0.284385	-0.377785	0.172031	0.335012	-0.281738	0.471015
FBgn0261563	FBgn0030628	wb	CG9114	0.168978	0.216983	-0.0615083	0.496012	-0.317248	0.135557	-0.165372	-0.320755	-0.237855	0.247076	0.31162	-0.0412362
FBgn0261563	FBgn0035767	wb	Cln7	0.223427	0.422476	-0.188035	0.238123	0.65407	0.0559407	0.382396	0	0.524972	0.4028	-0.035943	0.10928
FBgn0261563	FBgn0030773	wb	CG9676	0.452718	-0.375139	0.0385075	-0.0284525	0.727116	0.302123	0.367199	0.0173312	0.319047	-0.331256	-0.186716	0.298045
FBgn0261563	FBgn0004872	wb	piwi	0.0857748	-0.310592	-0.261216	0.108934	-0.373797	-0.0503201	-0.100914	-0.442073	-0.240246	-0.238453	-0.193973	-0.171092
FBgn0261563	FBgn0031726	wb	Cyp6a16	0.292124	0.00758362	-0.423458	-0.491352	0.550286	-0.644584	0.245795	-0.545462	0.325792	-0.0089644	-0.60514	-0.284043
FBgn0261563	FBgn0039612	wb	CG14523	0.216335	0.194272	-0.381682	-0.663443	0.652825	-0.523136	0.358832	-0.322206	0.479297	0.0525058	-0.553402	-0.196961
FBgn0261563	FBgn0039525	wb	CG5646	0.0485386	0.29161	0.03625	0.267511	0.623129	0.12643	0.398532	0.0683856	0.481858	0.297362	-0.0803381	0.0829847
FBgn0261563	FBgn0263763	wb	CG43680	0.311315	0.325145	0.378073	0.33468	0.201048	-0.209661	0.22633	0.321608	0.233587	0.383164	0.294288	0.0942542
FBgn0261563	FBgn0037225	wb	TwdlG	0.629353	0.10401	0.229486	0.252617	-0.00765645	0.275252	0.365833	0.257748	0.134551	0.0321865	0.0641168	0.267822
FBgn0261563	FBgn0039886	wb	CG2003	0.0350276	-0.425698	-0.3445	-0.485179	0.312002	-0.524968	0.43456	-0.365918	0.29002	-0.145992	-0.6474	-0.175958
FBgn0261563	FBgn0036787	wb	CG4306	0.348183	0.106734	-0.127157	-0.106514	0.331875	0.0536949	0.351746	-0.149748	0.273798	0.00179288	-0.102023	0.178007
FBgn0261563	FBgn0030993	wb	Mec2	0.0790447	0.38901	-0.003261	-0.160372	0.313397	-0.0633487	0.174848	0.10911	0.239221	0.31862	-0.13771	-0.000426876
FBgn0261563	FBgn0037230	wb	CG9780	-0.04735	0.0696348	0.0716413	-0.0980922	0.28871	-0.164721	0.165201	0.148724	0.41979	0.206267	-0.107402	-0.0582259
FBgn0261563	FBgn0050428	wb	CG30428	0.0789235	0.491121	0.160655	-0.00304511	0.285341	0.108044	0.185435	0.18774	0.0544694	0.37309	0.102536	0.0659965
FBgn0261563	FBgn0267408	wb	AOX1	-0.0722139	0.183361	-0.0543201	-0.14964	0.038424	0.0496962	0.0927175	0.0174165	0.149577	0.126441	-0.214206	-0.0476394
FBgn0261563	FBgn0261509	wb	haf	0.193183	0.119439	0.715349	0.63944	0.239989	0.0346269	0.184325	0.730641	0.170238	0.148468	0.515069	-0.103475
FBgn0261563	FBgn0262007	wb	CG42825	-0.195018	0.275388	-0.0297709	-0.300233	0.286512	-0.484854	-0.0161359	0.0688978	0.125672	0.182105	-0.168701	-0.19457
FBgn0261563	FBgn0030600	wb	hiw	0.0418261	-0.11925	0.0742357	-0.0671228	0.536628	0.18689	0.241783	0.127294	0.369419	-0.205157	-0.251686	0.191155
FBgn0261563	FBgn0037000	wb	ZnT77C	0.504796	0.199489	0.180204	0.0687488	0.162899	-0.0169537	0.185264	0.214548	0.180398	0.153932	-0.147528	-0.0450781
FBgn0261563	FBgn0040342	wb	CG3706	0.405879	-0.196656	-0.404913	-0.630432	0.4846	-0.715441	0.422693	-0.4892	0.255187	-0.263639	-0.735422	-0.356868
FBgn0261563	FBgn0030367	wb	Cyp311a1	0.348963	-0.0995782	-0.131583	-0.374245	0.592288	-0.104439	0.456416	-0.0293691	0.359515	-0.00554939	-0.313669	-0.0835823
FBgn0261563	FBgn0027934	wb	alpha-Est4aPsi	0.481884	-0.395057	0.162428	-0.0231192	0.540291	-0.71128	0.336635	0.305046	0.314778	-0.29241	-0.00870827	-0.240246
FBgn0261563	FBgn0035243	wb	CG13926	0.191052	0.247778	0.247619	0.0827114	-0.311597	-0.419814	0.117562	0.112098	-0.303509	0.268505	0.153078	-0.309997
FBgn0261563	FBgn0034817	wb	Art7	0.345997	0.116295	-0.394457	-0.218705	0.455216	0.143395	0.420473	-0.521216	0.33228	0.166652	-0.228379	0.0323572
FBgn0261563	FBgn0014073	wb	Tie	-0.307941	0.0273869	0.0785822	0.44319	0.513887	0.225138	-0.144199	0.21378	0.204218	-0.126099	0.331853	0.176385
FBgn0261563	FBgn0038173	wb	Adgf-C	-0.0241495	0.286489	0.165191	-0.38639	0.698396	0.141043	0.360198	0.179117	0.55528	0.100828	-0.226671	0.0696662
FBgn0261563	FBgn0037975	wb	CG3397	0.176261	0.203423	-0.382361	-0.171926	0.352934	0.172275	0.479638	-0.359515	0.326816	0.285153	-0.0274908	0.277384
FBgn0261563	FBgn0032399	wb	CG6785	0.139573	0.32637	0.775555	0.784847	0.28849	0.481735	0.286434	0.760693	0.228379	0.17758	0.541877	0.451635
FBgn0261563	FBgn0036550	wb	CG17026	0.403792	-0.702729	-0.299193	-0.745908	0.580048	-0.0420879	0.424912	-0.289422	0.27525	-0.521045	-0.632204	0.126953
FBgn0261563	FBgn0035670	wb	CG10472	0.239635	-0.492791	-0.0335192	-0.503597	0.518978	-0.286566	0.277043	-8.54e-05	0.317852	-0.272774	-0.503287	-0.272603
FBgn0261563	FBgn0039777	wb	Jon99Fii	0.203173	-0.676337	-0.093628	-0.621049	0.374683	-0.172728	0.20823	-0.202339	0.0601042	-0.615299	-0.747119	-0.197473
FBgn0261563	FBgn0002962	wb	nos	-0.0649725	-0.201725	-0.201501	0.0154904	-0.284104	-0.0696959	-0.274396	-0.341842	-0.210535	-0.298472	-0.309912	-0.273286
FBgn0261563	FBgn0037408	wb	NPFR	0.489242	-0.160012	-0.158663	-0.450005	0.210942	-0.140524	0.289849	-0.082131	0.228464	-0.0362845	-0.35721	0.033894
FBgn0261563	FBgn0039494	wb	grass	0.181968	0.266151	-0.0856922	-0.650442	0.695681	0.172868	0.442329	0.0302228	0.469991	0.260736	-0.58354	0.303082
FBgn0261563	FBgn0015036	wb	Cyp4ae1	0.0378655	0.213721	-0.269974	-0.424409	0.604132	0.100135	0.281482	-0.216341	0.421241	0.0545548	-0.430803	-0.0932297
FBgn0261563	FBgn0267828	wb	Fatp	0.432322	0.200106	-0.380491	-0.297692	0.725282	0.163852	0.501323	-0.316059	0.529156	0.0803381	-0.3129	-0.04892
FBgn0261563	FBgn0038034	wb	Cyp9f3	0.322314	-0.030271	-0.422459	-0.390903	0.602396	-0.0659645	0.413643	-0.47554	0.381883	-0.203449	-0.578076	0.084863
FBgn0261563	FBgn0022702	wb	Cht2	0.59764	-0.0590214	-0.232911	-0.534287	-0.156085	-0.0187835	0.333988	-0.293947	-0.138649	0.0243319	-0.33117	-0.215402
FBgn0261563	FBgn0032470	wb	CG5142	-0.285889	-0.290712	0.0573556	-0.41293	0.564067	0.341617	0.0754717	0.204132	0.382225	-0.211901	-0.154871	0.286178
FBgn0261563	FBgn0069973	wb	CG40485	0.418225	0.213263	0.444785	0.579835	0.692535	0.178466	0.607018	0.506104	0.458465	0.278835	0.55622	0.124221
FBgn0261563	FBgn0031141	wb	CG1304	0.0696096	0.292861	-0.602063	-0.402575	0.325124	0.476343	0.164603	-0.584131	0.180825	0.228123	-0.589853	0.223939
FBgn0261563	FBgn0013771	wb	Cyp6a9	-0.00155513	-0.0282583	-0.292244	-0.23213	0.154765	-0.142559	0.0471271	-0.427218	0.210365	-0.0711176	-0.529497	-0.104926
FBgn0261563	FBgn0031935	wb	CG13793	0.239479	-0.301878	-0.169099	-0.262865	0.253997	-0.403844	0.227525	-0.322035	0.17169	-0.138137	-0.590284	-0.160676
FBgn0261563	FBgn0029906	wb	xit	0.337102	0.228105	-0.438682	-0.480413	0.841626	0.0959175	0.433194	-0.621959	0.582174	0.122087	-0.607615	0.0415777
FBgn0261563	FBgn0035227	wb	Iml1	0.0846713	0.141565	0.149264	0.162183	0.070184	-0.143773	0.285068	0.19568	0.157176	0.355759	0.0900709	-0.00435414
FBgn0261563	FBgn0040725	wb	CG13946	-0.0550212	-0.182128	-0.073038	-0.098439	-0.056618	-0.125755	-0.183365	-0.214285	0.0803125	-0.47221	-0.408264	0.242295
FBgn0261563	FBgn0260874	wb	Ir76a	0.42197	0.570314	0.209489	0.399606	-0.131805	-0.198553	0.13549	0.173141	-0.209852	0.365321	0.193887	-0.142833
FBgn0261563	FBgn0031307	wb	MFS3	-0.0550292	-0.233107	0.259329	-0.555916	0.48458	-0.36508	0.187399	0.314864	0.266627	-0.0527619	-0.53812	-0.217365
FBgn0261563	FBgn0259748	wb	CG42397	0.350752	-0.478991	-0.23087	-0.655347	0.595425	-0.0524687	0.2481	-0.143345	0.274225	-0.383932	-0.570819	0.0115257
FBgn0261563	FBgn0040554	wb	CR17025	0.114039	-0.260615	0.0628375	-0.454573	0.14561	-0.112267	0.124648	0.108768	0.0676172	-0.2195	-0.198583	-0.176641
FBgn0261563	FBgn0034494	wb	CG10444	0.366111	0.216872	-0.418402	-0.473397	0.179834	0.166	0.334671	-0.566977	0.039358	0.017758	-0.6474	-0.00110988
FBgn0261563	FBgn0015568	wb	alpha-Est1	0.265097	-0.221753	-0.0329593	-0.421534	0.336759	-0.625672	0.475881	-0.0418339	0.237172	-0.145223	-0.463417	-0.365747
FBgn0261563	FBgn0260720	wb	CR42547	0.0588653	-0.0187003	0.630861	0.757996	0.474662	0.344881	0.417912	0.664817	0.165201	-0.148638	0.72808	0.374626
FBgn0261563	FBgn0035666	wb	Jon65Aii	0.254116	-0.724565	-0.256159	-0.628163	0.330077	-0.197102	0.157261	-0.261334	0.137027	-0.476565	-0.718603	-0.193802
FBgn0261563	FBgn0031735	wb	CG11029	0.379223	0.360583	0.130147	-0.0887372	0.645838	0.102852	0.447878	0.130624	0.460172	0.312815	-0.144711	0.215999
FBgn0261563	FBgn0036483	wb	CG12316	-0.447583	0.0456676	0.422197	0.854413	-0.678118	0.000833327	-0.551695	0.25826	-0.4244	-0.00785452	0.659694	-0.149151
FBgn0261563	FBgn0032147	wb	IP3K1	-0.456225	0.459133	0.668766	0.593023	0.159387	0.3917	-0.291386	0.61786	0.103646	0.489883	0.705712	0.464441
FBgn0261563	FBgn0035667	wb	Jon65Ai	0.442924	-0.245608	-0.231464	-0.493829	0.614172	-0.0345514	0.276103	-0.31401	0.257833	-0.211901	-0.676086	-0.13882
FBgn0261563	FBgn0029603	wb	CG14053	-0.0360855	0.672909	-0.22049	0.0563884	0.290743	0.113732	0.0601042	-0.418765	0.1115	0.361479	-0.060531	0.237428
FBgn0261563	FBgn0002869	wb	MtnB	-0.486882	-0.139843	0.539419	0.692726	0.383104	0.182489	-0.282336	0.454794	0.242295	-0.181849	0.566977	0.0454196
FBgn0261563	FBgn0033451	wb	CG1665	-0.0286841	-0.542865	-0.433423	-0.655736	0.550638	-0.485856	0.253735	-0.543413	0.312303	-0.318279	-0.731922	-0.159652
FBgn0261563	FBgn0033205	wb	CG2064	0.00651809	0.515891	-0.357987	-0.55777	0.466528	0.725798	0.337232	-0.2913	0.424059	0.502348	-0.402288	0.377017
FBgn0261563	FBgn0051097	wb	CG31097	0.215953	0.143953	0.20258	0.157608	0.515477	0.223952	0.29019	0.194229	0.257662	0.0600188	0.0545548	0.210279
FBgn0261563	FBgn0038674	wb	CG14285	0.454893	0.424365	0.05764	0.0254821	0.666326	0.384293	0.742594	0.0831555	0.533339	0.525228	0.122855	0.434048
FBgn0261563	FBgn0264721	wb	CR43989	-0.705931	-0.400071	0.206565	0.250864	-0.293034	-0.347728	-0.402373	0.0219414	-0.181764	-0.377273	0.194229	-0.196448
FBgn0261563	FBgn0051664	wb	CG31664	-0.00231083	-0.0821534	-0.203095	-0.447896	0.465494	-0.160239	0.0132332	-0.356527	0.317254	-0.00017075	-0.578929	0.0635192
FBgn0053958	FBgn0264950	CG33958	CR44119	-0.195415	-0.197081	0.764259	0.707885	-0.0421704	-0.124757	-0.174592	0.711432	-0.357551	-0.240331	0.542303	-0.258516
FBgn0053958	FBgn0031484	CG33958	CG3165	0.21832	0.189389	-0.0742973	0.165401	0.534417	0.710214	0.357978	-0.292154	0.735934	-0.0104158	0.0283446	0.576454
FBgn0053958	FBgn0023507	CG33958	D2hgdh	-0.44929	-0.365308	0.146732	-0.133092	-0.0624463	-0.104527	-0.453342	-0.0179288	-0.389738	-0.386238	-0.146589	-0.325536
FBgn0053958	FBgn0030629	CG33958	CG9123	0.323842	-0.295916	-0.0354441	0.407417	0.355443	0.316668	0.306326	-0.223	0.145138	-0.221463	0.197473	0.34688
FBgn0053958	FBgn0028543	CG33958	NimB2	-0.0936436	-0.154146	-0.006563	0.0626121	0.0785033	0.091473	-0.108597	-0.0700931	-0.279604	-0.293349	0.0466149	-0.015709
FBgn0053958	FBgn0259716	CG33958	CG42370	-0.222774	-0.148486	0.373482	0.37368	0.71024	0.652062	-0.264236	0.314181	0.0586528	-0.263468	0.2913	0.280628
FBgn0053958	FBgn0052523	CG33958	CG32523	0.427563	0.431231	0.622546	0.448224	0.167296	0.00523942	0.42773	0.435926	-0.325536	0.24793	0.304619	0.0524204
FBgn0053958	FBgn0035496	CG33958	CG14990	0.26177	0.539981	0.596865	-0.119583	0.363961	0.430384	0.350038	0.150346	-0.0569453	0.326389	-0.166567	0.270896
FBgn0053958	FBgn0052553	CG33958	CR32553	0.428732	0.282107	-0.245924	-0.330363	-0.0983798	-0.0297975	0.408862	-0.433109	-0.369419	0.131136	-0.369675	-0.450269
FBgn0053958	FBgn0085732	CG33958	CR40190	-0.477809	-0.125149	0.479609	0.514395	-0.329776	-0.275132	-0.424827	0.164006	-0.636472	-0.00580551	0.351319	-0.320755
FBgn0053958	FBgn0004426	CG33958	LysC	0.0555367	-0.0698286	0.502635	0.00554171	-0.262581	0.0656555	-0.030919	0.487749	-0.289507	-0.307801	0.0837531	-0.19235
FBgn0053958	FBgn0053282	CG33958	CG33282	0.263711	0.264258	0.64033	0.603589	-0.099864	-0.336147	0.301716	0.522411	-0.376761	0.10578	0.398105	-0.426022
FBgn0053958	FBgn0262887	CG33958	CR43242	0.35932	0.0893663	0.0578769	0.130861	0.54103	0.52834	0.419192	-0.139759	0.082814	0.143089	0.0422607	0.162811
FBgn0053958	FBgn0261429	CG33958	CR42646	-0.329198	-0.504781	-0.180075	-0.319787	-0.16807	-0.218586	-0.346111	-0.213438	-0.622898	-0.102109	-0.318706	-0.364638
FBgn0053958	FBgn0030628	CG33958	CG9114	0.0520604	0.0745671	0.0168163	0.595527	0.0953927	0.357274	-0.0776915	-0.112268	0.356868	-0.271408	0.378895	0.400239
FBgn0053958	FBgn0035767	CG33958	Cln7	-0.0799013	-0.224816	0.0788507	0.361281	-0.0928209	0.123871	-0.0535303	-0.145223	-0.405276	-0.355076	0.100743	-0.0580552
FBgn0053958	FBgn0030773	CG33958	CG9676	0.485479	0.459676	-0.120613	-0.132079	-0.133078	-0.219865	0.470247	-0.141296	-0.502262	0.378041	-0.2411	-0.134124
FBgn0053958	FBgn0004872	CG33958	piwi	0.440516	0.581507	-0.40153	-0.149852	0.11851	0.207822	0.129514	-0.472466	0.387262	0.316059	-0.228464	0.050969
FBgn0053958	FBgn0031726	CG33958	Cyp6a16	-0.104707	-0.00925354	-0.574263	-0.268916	0.219747	0.261751	0.010245	-0.653889	0.0114403	-0.158627	-0.398019	0.163494
FBgn0053958	FBgn0039612	CG33958	CG14523	-0.0478106	-0.179176	-0.250377	-0.553144	0.249555	0.366767	0.0340647	-0.253906	-0.227696	-0.204474	-0.232733	0.0864851
FBgn0053958	FBgn0039525	CG33958	CG5646	-0.0990819	-0.0768222	0.223378	0.350982	-0.0278239	0.0147472	-0.0167335	-0.0518228	-0.377017	-0.127636	0.0477248	-0.0340647
FBgn0053958	FBgn0263763	CG33958	CG43680	-0.168619	-0.210807	0.69101	0.359158	0.627669	0.822354	-0.353283	0.462136	0.197814	-0.368309	0.0696662	0.553829
FBgn0053958	FBgn0037225	CG33958	TwdlG	0.150456	0.430405	0.455039	0.0141575	0.490982	0.289805	0.137881	0.233416	0.250576	0.237258	-0.208828	0.0505421
FBgn0053958	FBgn0039886	CG33958	CG2003	0.0049613	0.049052	-0.189298	-0.570003	-0.000247037	-0.108135	-0.0426876	-0.414155	-0.215146	-0.0265517	-0.498164	-0.0587382
FBgn0053958	FBgn0036787	CG33958	CG4306	-0.0289321	0.0457418	-0.0288728	0.00912308	-0.151849	-0.500038	-0.167506	-0.177922	-0.406301	-0.0554085	-0.0331256	-0.530522
FBgn0053958	FBgn0030993	CG33958	Mec2	-0.140771	-0.201262	0.261011	0.165541	0.182187	0.524119	-0.130966	0.0718859	-0.0146845	-0.323401	0.0980961	0.221719
FBgn0053958	FBgn0037230	CG33958	CG9780	-0.260835	-0.337006	0.239085	0.280128	0.488746	0.695624	-0.397251	0.16264	0.0244173	-0.325963	0.189789	0.310766
FBgn0053958	FBgn0050428	CG33958	CG30428	-0.403997	-0.523364	0.270786	0.128488	-0.408097	-0.753781	-0.501153	0.287288	-0.70887	-0.417826	0.0470417	-0.724851
FBgn0053958	FBgn0267408	CG33958	AOX1	-0.150951	-0.316156	-0.0737405	0.0781042	0.483931	0.518984	-0.304448	-0.0657389	0.344489	-0.299155	-0.0214292	0.287715
FBgn0053958	FBgn0261509	CG33958	haf	-0.198478	-0.354356	0.572098	0.567205	0.230111	0.422349	-0.331512	0.624947	-0.116025	-0.277299	0.462051	0.162469
FBgn0053958	FBgn0262007	CG33958	CG42825	-0.365936	-0.403818	-0.147563	0.0352595	0.332191	0.176071	-0.298813	0.0572868	0.188935	-0.481175	0.061214	-0.0520789
FBgn0053958	FBgn0030600	CG33958	hiw	-0.185385	0.289465	0.0471143	-0.0794678	0.0827878	-0.0454715	-0.0761547	-0.0471271	-0.229318	0.240844	-0.206608	-0.246051
FBgn0053958	FBgn0037000	CG33958	ZnT77C	0.0531641	0.107166	0.369956	-0.180545	0.364469	0.702208	-0.111159	0.179886	0.265602	-0.0261248	-0.202339	0.39708
FBgn0053958	FBgn0040342	CG33958	CG3706	0.423224	0.205301	-0.222321	-0.680951	0.245309	0.485704	0.482199	-0.524716	-0.0603603	0.118842	-0.561001	0.233416
FBgn0053958	FBgn0030367	CG33958	Cyp311a1	0.0515302	-0.111555	0.122724	-0.0580767	0.171396	0.569971	0.284043	-0.0650559	-0.182618	-0.0644583	0.0295398	0.234013
FBgn0053958	FBgn0027934	CG33958	alpha-Est4aPsi	0.234885	0.329897	0.544778	0.22818	0.155862	0.616505	0.196961	0.366089	-0.0565184	0.0728251	0.125928	0.27542
FBgn0053958	FBgn0035243	CG33958	CG13926	-0.189459	-0.0429643	0.445826	0.411743	0.260278	0.626683	-0.294288	0.202852	0.435072	-0.223512	0.162213	0.514727
FBgn0053958	FBgn0034817	CG33958	Art7	-0.0481784	-0.0543467	-0.201566	0.0281504	0.107731	0.187192	-0.0333817	-0.345684	-0.136856	-0.279689	-0.0529326	0.012977
FBgn0053958	FBgn0014073	CG33958	Tie	-0.297905	-0.0464087	0.0899741	0.337277	-0.242282	0.436415	-0.207547	0.082131	-0.319133	0.0120379	0.214463	0.185691
FBgn0053958	FBgn0038173	CG33958	Adgf-C	-0.0194336	-0.336978	0.346894	-0.140389	-0.104352	0.147505	0.0498591	0.156749	-0.401434	-0.516776	0.0850337	0.0416631
FBgn0053958	FBgn0037975	CG33958	CG3397	0.120004	-0.281091	-0.161401	0.0694594	-0.0265005	-0.378481	0.0374797	-0.231708	-0.400581	-0.393665	0.152651	-0.392726
FBgn0053958	FBgn0032399	CG33958	CG6785	0.203256	-0.355942	0.683556	0.752607	-0.0151549	-0.421309	0.16375	0.718176	-0.313583	-0.17058	0.335781	-0.473491
FBgn0053958	FBgn0036550	CG33958	CG17026	0.240607	0.0509541	-0.13334	-0.469802	-0.325928	-0.556595	0.350636	-0.256296	-0.687783	-0.0378212	-0.364125	-0.608555
FBgn0053958	FBgn0035670	CG33958	CG10472	-0.147619	-0.32233	0.143572	-0.395593	0.0133478	0.213047	-0.0986938	-0.0939127	-0.297703	-0.350551	-0.25143	-0.0326987
FBgn0053958	FBgn0039777	CG33958	Jon99Fii	0.361075	0.427533	-0.0771444	-0.510861	-0.174887	0.0373156	0.406728	-0.376675	-0.393751	0.300265	-0.498079	-0.173482
FBgn0053958	FBgn0002962	CG33958	nos	0.262375	0.580309	-0.331846	-0.357226	-0.0157893	0.219222	0.0104158	-0.279262	0.277384	0.415521	-0.315974	0.129856
FBgn0053958	FBgn0037408	CG33958	NPFR	0.137469	0.296126	0.182798	-0.272721	0.445143	0.685148	0.224366	0.0664219	0.179459	0.18441	-0.220695	0.231623
FBgn0053958	FBgn0039494	CG33958	grass	-0.212664	-0.263225	0.15433	-0.454005	-0.453914	-0.120108	-0.172202	-0.0355161	-0.509349	-0.266029	-0.338342	-0.323999
FBgn0053958	FBgn0015036	CG33958	Cyp4ae1	-0.065541	-0.183614	-0.197957	-0.380984	0.102806	0.349226	0.0817895	-0.294801	-0.176812	-0.161188	-0.287458	0.0099889
FBgn0053958	FBgn0267828	CG33958	Fatp	0.0549683	-0.1508	-0.213068	-0.152602	-0.125994	-0.254796	0.158798	-0.331768	-0.451464	-0.147614	-0.0711176	-0.362674
FBgn0053958	FBgn0038034	CG33958	Cyp9f3	0.322317	0.149122	-0.30901	-0.446639	-0.229089	-0.233549	0.276189	-0.492957	-0.537352	0.104926	-0.403142	-0.274737
FBgn0053958	FBgn0022702	CG33958	Cht2	0.0960054	0.205598	-0.107558	-0.300759	-0.0136803	0.319863	0.017758	-0.131563	0.206523	-0.110305	-0.0781183	0.0697516
FBgn0053958	FBgn0032470	CG33958	CG5142	-0.227491	-0.0848849	0.334482	-0.165155	-0.322334	-0.510974	-0.1331	0.224451	-0.685478	-0.22411	-0.232477	-0.548621
FBgn0053958	FBgn0069973	CG33958	CG40485	0.11295	0.368796	0.67801	0.620524	-0.264767	-0.641552	0.142235	0.541108	-0.517374	0.197814	0.450269	-0.48459
FBgn0053958	FBgn0031141	CG33958	CG1304	-0.384668	-0.61392	-0.381956	-0.512156	-0.159613	-0.163267	-0.414838	-0.514435	-0.363528	-0.603432	-0.570806	-0.311449
FBgn0053958	FBgn0013771	CG33958	Cyp6a9	0.25986	0.265559	-0.236626	-0.288094	-0.032967	0.000275448	0.406728	-0.618458	0.0722274	0.234696	-0.49364	0.147016
FBgn0053958	FBgn0031935	CG33958	CG13793	-0.0685285	-0.391591	-0.185334	-0.532228	-0.0397495	-0.0461107	-0.0371382	-0.518142	-0.260736	-0.322974	-0.591394	-0.103389
FBgn0053958	FBgn0029906	CG33958	xit	0.189547	-0.172623	-0.286498	-0.403737	-0.0484314	0.0793357	0.189106	-0.659438	-0.319986	-0.356356	-0.32767	-0.0988645
FBgn0053958	FBgn0035227	CG33958	Iml1	-0.315098	-0.191275	0.244566	0.299812	0.689504	0.762919	-0.35499	0.0648852	0.294374	-0.272432	0.140442	0.327926
FBgn0053958	FBgn0040725	CG33958	CG13946	0.290028	0.178146	-0.0673997	-0.123595	-0.0985547	0.517125	0.161165	-0.216064	0.171726	0.352002	-0.226159	0.286263
FBgn0053958	FBgn0260874	CG33958	Ir76a	-0.0508692	-0.03388	0.651198	0.366723	0.270612	0.537557	-0.0865705	0.214377	0.599761	-0.0837531	0.0948519	0.546401
FBgn0053958	FBgn0031307	CG33958	MFS3	-0.0686626	-0.290907	0.293949	-0.380901	-0.117791	0.369984	0.0233074	0.140869	-0.300265	-0.260224	-0.197814	0.0180995
FBgn0053958	FBgn0259748	CG33958	CG42397	0.16932	0.337169	-0.0902323	-0.614498	-0.352157	-0.113619	0.264322	-0.194826	-0.498164	0.171177	-0.446769	-0.240844
FBgn0053958	FBgn0040554	CG33958	CR17025	0.257674	0.43273	0.321289	-0.200188	-0.174395	-0.221282	0.356868	0.146162	-0.189874	0.206523	-0.135661	-0.080765
FBgn0053958	FBgn0034494	CG33958	CG10444	0.382636	0.449709	-0.37189	-0.705713	0.401792	0.345716	0.238624	-0.575088	0.274311	0.240673	-0.558012	0.319645
FBgn0053958	FBgn0015568	CG33958	alpha-Est1	0.166686	-0.121393	0.180561	-0.19426	0.240799	0.635863	0.0916076	0.015709	0.278409	-0.0577137	-0.0880219	0.375053
FBgn0053958	FBgn0260720	CG33958	CR42547	0.242436	0.286219	0.580543	0.784441	-0.0793768	-0.113355	0.0846922	0.614189	-0.332793	0.279006	0.554597	-0.293862
FBgn0053958	FBgn0035666	CG33958	Jon65Aii	-0.0549454	-0.0148924	-0.204613	-0.721117	-0.0717229	0.000311346	-0.151712	-0.399898	-0.23316	-0.108341	-0.565525	-0.167848
FBgn0053958	FBgn0031735	CG33958	CG11029	-0.0703292	-0.147688	0.339931	0.0145374	-0.324268	0.108528	0.00665927	0.0907539	-0.470161	-0.29796	0.0669342	-0.017758
FBgn0053958	FBgn0036483	CG33958	CG12316	-0.0501822	-0.0261905	0.2196	0.63786	0.240913	0.400739	-0.147102	0.256638	0.379664	0.26731	0.437207	0.554768
FBgn0053958	FBgn0032147	CG33958	IP3K1	-0.0386405	0.00550317	0.601623	0.620519	-0.209269	0.213356	-0.158883	0.541364	-0.0149407	-0.0836677	0.656877	0.0264663
FBgn0053958	FBgn0035667	CG33958	Jon65Ai	0.156732	0.371556	-0.0789341	-0.428869	-0.325647	-0.145705	0.242551	-0.300692	-0.646461	0.0942542	-0.480406	-0.276103
FBgn0053958	FBgn0029603	CG33958	CG14053	0.557922	-0.121252	-0.284934	0.151172	-0.0861601	-0.726872	0.437633	-0.457697	-0.204815	-0.220439	-0.169811	-0.485017
FBgn0053958	FBgn0002869	CG33958	MtnB	0.0414012	0.096529	0.336134	0.460799	-0.183386	0.108684	-0.0333817	0.258772	-0.177666	0.114061	0.258772	0.186716
FBgn0053958	FBgn0033451	CG33958	CG1665	-0.057787	-0.306462	-0.269369	-0.388094	-0.161551	-0.0757619	-0.0152822	-0.47554	-0.365491	-0.131307	-0.553914	-0.26842
FBgn0053958	FBgn0033205	CG33958	CG2064	-0.318284	-0.361463	-0.158951	-0.384814	-0.650455	-0.248069	-0.319303	-0.131051	-0.517288	-0.417997	-0.317767	-0.184325
FBgn0053958	FBgn0051097	CG33958	CG31097	-0.222554	-0.405616	0.288806	0.0338387	-0.389846	-0.444572	-0.21506	0.111073	-0.577137	-0.408435	-0.0736788	-0.397849
FBgn0053958	FBgn0038674	CG33958	CG14285	-0.14322	-0.351771	0.256611	0.17487	-0.151384	-0.519088	-0.0828993	0.166396	-0.558012	-0.379578	-0.00486639	-0.533766
FBgn0053958	FBgn0264721	CG33958	CR43989	-0.0904389	-0.155195	-0.0462181	0.343345	0.0217955	0.27714	-0.0806796	-0.131819	0.453855	0.0259541	0.214377	0.318535
FBgn0053958	FBgn0051664	CG33958	CG31664	-0.081905	-0.0580339	-0.329288	-0.49759	-0.115516	0.0656679	-0.275335	-0.46538	-0.184581	-0.166738	-0.485956	0.13643
FBgn0264950	FBgn0031484	CR44119	CG3165	-0.145111	-0.234359	-0.121689	0.296458	-0.422378	-0.231554	-0.107317	-0.283019	-0.50047	-0.0347477	0.245368	-0.485102
FBgn0264950	FBgn0023507	CR44119	D2hgdh	0.110327	0.184089	0.0956528	-0.122951	0.707573	0.516718	0.0947665	-0.0179288	0.614445	0.0469564	-0.182703	0.469222
FBgn0264950	FBgn0030629	CR44119	CG9123	0.168086	0.377749	-0.0702524	0.455195	0.3635	-0.716223	0.0744472	-0.299326	0.513703	0.383676	0.458636	-0.677111
FBgn0264950	FBgn0028543	CR44119	NimB2	0.148922	0.074309	-0.0111325	-0.0780857	0.384384	0.218383	0.0588235	-0.0846068	0.237855	0.0483224	-0.0548109	0.0569453
FBgn0264950	FBgn0259716	CR44119	CG42370	0.207912	-0.0248328	0.487401	0.326078	0.228962	-0.111667	0.114317	0.432938	0.339793	0.00256126	0.182874	-0.145479
FBgn0264950	FBgn0052523	CR44119	CG32523	-0.407571	-0.330892	0.624968	0.532484	0.142605	-0.35833	-0.140271	0.421156	0.10228	-0.140101	0.416033	-0.20601
FBgn0264950	FBgn0035496	CR44119	CG14990	-0.350659	-0.465403	0.441095	-0.025103	0.17837	-0.480952	-0.0996329	0.230428	0.138905	-0.269615	-0.204218	-0.378639
FBgn0264950	FBgn0052553	CR44119	CR32553	-0.387789	-0.393274	-0.358069	-0.449225	0.0702937	0.18209	-0.216682	-0.545206	0.229318	-0.126697	-0.322889	0.351234
FBgn0264950	FBgn0085732	CR44119	CR40190	0.55595	0.721049	0.607854	0.853032	0.64881	0.776161	0.165201	0.398532	0.683599	0.211133	0.630411	0.732776
FBgn0264950	FBgn0004426	CR44119	LysC	-0.170282	-0.192003	0.407256	0.20914	0.447989	0.731297	0.0959173	0.543243	0.700077	0.0772384	0.280543	0.695637
FBgn0264950	FBgn0053282	CR44119	CG33282	-0.32684	-0.172918	0.671782	0.423749	0.768349	0.781076	0.00435414	0.518057	0.557586	-0.0969009	0.509775	0.517118
FBgn0264950	FBgn0262887	CR44119	CR43242	-0.387313	0.0989433	0.149618	0.252542	0.116535	-0.134511	-0.198241	0.00187825	0.0621532	-0.0673611	0.172458	-0.187142
FBgn0264950	FBgn0261429	CR44119	CR42646	0.481077	0.510174	-0.1935	0.0300774	0.572206	0.677076	0.205327	-0.227354	0.576454	0.0674464	0.0126355	0.6906
FBgn0264950	FBgn0030628	CR44119	CG9114	0.356756	-0.184532	0.0449607	0.632931	-0.597712	0.14886	0.0832408	-0.14787	-0.603688	0.0536156	0.503799	-0.00187825
FBgn0264950	FBgn0035767	CR44119	Cln7	0.11512	0.0716308	-0.0062019	0.187603	0.550412	0.208142	0.139845	-0.0968155	0.38564	0.145309	0.0315035	0.0606164
FBgn0264950	FBgn0030773	CR44119	CG9676	-0.334059	-0.187827	-0.00986819	-0.0475122	0.371462	0.115241	-0.133271	-0.113976	0.371297	-0.1512	-0.205413	0.0445659
FBgn0264950	FBgn0004872	CR44119	piwi	-0.211103	-0.446557	-0.525187	-0.0445744	-0.397976	0.0144261	-0.12277	-0.438316	-0.471613	-0.328268	-0.157517	-0.492274
FBgn0264950	FBgn0031726	CR44119	Cyp6a16	-0.0405201	-0.148272	-0.484758	-0.627319	-0.0375841	-0.653152	-0.144455	-0.661829	-0.269444	-0.132929	-0.656962	-0.682063
FBgn0264950	FBgn0039612	CR44119	CG14523	-0.155177	-0.229681	-0.325334	-0.696846	0.0548343	-0.365022	-0.167421	-0.310168	-0.0538718	-0.263724	-0.636643	-0.302826
FBgn0264950	FBgn0039525	CR44119	CG5646	0.299149	0.10606	0.144404	0.0971002	0.463368	0.331485	0.109707	-0.0528473	0.374797	0.187655	-0.0367113	0.280543
FBgn0264950	FBgn0263763	CR44119	CG43680	-0.205428	-0.103312	0.496338	0.474371	0.0971654	-0.100095	-0.0343208	0.418936	0.100999	0.136942	0.515496	-0.0524204
FBgn0264950	FBgn0037225	CR44119	TwdlG	-0.228016	-0.0229403	0.235895	0.40514	0.379964	0.731486	0.048237	0.208913	0.502262	0.101511	0.355246	0.653974
FBgn0264950	FBgn0039886	CR44119	CG2003	-0.273555	-0.353716	-0.365618	-0.447251	-0.250875	-0.56669	-0.142662	-0.374797	-0.45283	-0.322121	-0.510544	-0.56211
FBgn0264950	FBgn0036787	CR44119	CG4306	-0.0455415	0.380228	-0.0905059	-0.348929	-0.153178	-0.261184	-0.128831	-0.206779	-0.272945	0.230598	-0.389994	-0.222829
FBgn0264950	FBgn0030993	CR44119	Mec2	0.111646	-0.0113146	0.109135	0.138012	0.464438	0.202796	0.0586528	0.0728251	0.370443	0.0298813	-0.0370528	0.180654
FBgn0264950	FBgn0037230	CR44119	CG9780	0.182624	0.0506023	0.316845	0.130879	0.382514	0.196411	0.143345	0.248186	0.391787	-0.0105865	0.0642022	0.141723
FBgn0264950	FBgn0050428	CR44119	CG30428	0.474004	0.575404	0.331115	0.076546	0.352293	0.194791	0.161957	0.295911	0.331256	0.41407	0.165201	0.0711618
FBgn0264950	FBgn0267408	CR44119	AOX1	0.352658	0.0365929	-0.0559699	0.036383	0.201937	0.275191	0.0975839	-0.0395287	0.188082	-0.0268078	-0.104414	0.260309
FBgn0264950	FBgn0261509	CR44119	haf	0.402229	0.182985	0.815584	0.760465	0.647411	0.508797	0.182874	0.733032	0.715786	0.0577137	0.559122	0.467002
FBgn0264950	FBgn0262007	CR44119	CG42825	0.0954562	0.0697428	-0.0114819	-0.0189786	-0.0393792	-0.0857335	0.0192094	0.0348331	-0.149407	0.09101	0.000768377	-0.113976
FBgn0264950	FBgn0030600	CR44119	hiw	0.103514	-0.182755	0.0278379	-0.00333339	0.709989	0.873744	0.0701784	8.54e-05	0.653718	-0.0569453	-0.217963	0.793136
FBgn0264950	FBgn0037000	CR44119	ZnT77C	-0.0240291	-0.285794	0.20389	0.246355	0.327812	0.108416	0.04892	0.259968	0.449501	-0.197131	0.174592	0.209084
FBgn0264950	FBgn0040342	CR44119	CG3706	-0.375374	-0.410936	-0.43634	-0.645982	-0.0274879	-0.450414	-0.205242	-0.57671	-0.124306	-0.226757	-0.644754	-0.190045
FBgn0264950	FBgn0030367	CR44119	Cyp311a1	-0.167878	-0.365674	-0.0219918	-0.345103	0.199322	-0.209753	-0.132844	-0.00776914	0.110049	-0.270896	-0.306412	-0.13643
FBgn0264950	FBgn0027934	CR44119	alpha-Est4aPsi	-0.311126	-0.432532	0.362649	0.254162	0.352976	-0.129828	0.0649705	0.464868	0.287885	-0.167762	0.283616	-0.190814
FBgn0264950	FBgn0035243	CR44119	CG13926	-0.0132636	-0.0988826	0.367794	0.312653	-0.374118	-0.314456	-0.0464441	0.14343	-0.497567	0.117476	0.307095	-0.545975
FBgn0264950	FBgn0034817	CR44119	Art7	-0.151859	-0.156694	-0.325816	-0.0714025	-0.0697029	0.337619	-0.118159	-0.421583	-0.171433	-0.0673611	-0.0791428	0.223427
FBgn0264950	FBgn0014073	CR44119	Tie	0.418492	0.210981	0.144914	0.431535	0.327221	0.227451	0.145821	0.184069	0.301887	-0.00017075	0.338598	0.161188
FBgn0264950	FBgn0038173	CR44119	Adgf-C	0.21689	0.0906993	0.218779	-0.284759	0.452855	0.411764	0.101084	0.0472125	0.28447	0.167506	-0.110817	0.444207
FBgn0264950	FBgn0037975	CR44119	CG3397	-0.502341	-0.105122	-0.279691	-0.119183	-0.170537	-0.174636	-0.301033	-0.280372	-0.250576	-0.0627508	-0.0430291	-0.148638
FBgn0264950	FBgn0032399	CR44119	CG6785	0.771192	0.736179	0.803783	0.789074	0.847608	0.888945	0.510715	0.728165	0.827884	0.343977	0.687356	0.859131
FBgn0264950	FBgn0036550	CR44119	CG17026	-0.328443	-0.372092	-0.188633	-0.650273	0.359647	-0.122159	-0.212328	-0.194399	0.163152	-0.107231	-0.589431	-0.0347477
FBgn0264950	FBgn0035670	CR44119	CG10472	0.113157	-0.477317	0.0960849	-0.301837	0.455335	0.471241	0.051652	0.0474686	0.414924	-0.112781	-0.340989	0.398532
FBgn0264950	FBgn0039777	CR44119	Jon99Fii	-0.208506	-0.683169	-0.153615	-0.621268	0.528562	0.700876	-0.0519081	-0.259455	0.462136	-0.4641	-0.710236	0.559378
FBgn0264950	FBgn0002962	CR44119	nos	0.107745	-0.352995	-0.291511	-0.22845	-0.296584	0.00757663	0.0347477	-0.304704	-0.369845	-0.122257	-0.244515	-0.719116
FBgn0264950	FBgn0037408	CR44119	NPFR	0.0778403	-0.446305	-0.0825819	-0.122563	0.040828	0.340464	0.150602	-0.0162213	0.0465295	-0.25715	-0.138393	0.318023
FBgn0264950	FBgn0039494	CR44119	grass	-0.132782	-0.0949013	-0.0241259	-0.336883	0.601205	0.170889	-0.00606164	0.0285153	0.384018	0.0175019	-0.350038	0.21156
FBgn0264950	FBgn0015036	CR44119	Cyp4ae1	0.183721	-0.191058	-0.402177	-0.358169	0.279875	0.402883	0.00913515	-0.398361	0.18663	-0.132758	-0.476991	0.40946
FBgn0264950	FBgn0267828	CR44119	Fatp	-0.153705	-0.233872	-0.317238	-0.214926	0.199883	0.606566	-0.0700931	-0.355076	0.0774353	-0.156066	-0.299411	0.389226
FBgn0264950	FBgn0038034	CR44119	Cyp9f3	-0.495736	-0.189362	-0.580158	-0.482259	0.0196523	-0.448223	-0.423205	-0.550926	-0.0933151	-0.325706	-0.648766	-0.36737
FBgn0264950	FBgn0022702	CR44119	Cht2	-0.103073	-0.606855	-0.189143	-0.336791	-0.08861	0.129109	-0.0522496	-0.206437	-0.0542133	-0.17075	-0.277213	0.0421754
FBgn0264950	FBgn0032470	CR44119	CG5142	0.150784	0.357563	0.28529	-0.149543	0.80927	0.657583	0.112866	0.233074	0.576966	0.258943	0.00204901	0.584137
FBgn0264950	FBgn0069973	CR44119	CG40485	-0.488823	-0.286404	0.671794	0.475957	0.438109	0.201905	-0.2446	0.528387	0.40041	-0.199522	0.453513	0.282763
FBgn0264950	FBgn0031141	CR44119	CG1304	-0.0209964	0.361437	-0.654411	-0.305129	0.819917	0.83521	-0.0466149	-0.529467	0.737813	0.190557	-0.495388	0.687356
FBgn0264950	FBgn0013771	CR44119	Cyp6a9	-0.25325	-0.0915351	-0.486578	-0.589368	-0.386029	-0.695893	-0.135149	-0.642192	-0.661999	-0.219329	-0.720652	-0.763852
FBgn0264950	FBgn0031935	CR44119	CG13793	-0.416675	0.142446	-0.29957	-0.402715	-0.118433	-0.559201	-0.285068	-0.484675	-0.370358	-0.0520789	-0.635789	-0.558439
FBgn0264950	FBgn0029906	CR44119	xit	-0.493358	-0.113037	-0.616264	-0.428413	0.361116	0.590989	-0.33322	-0.777427	0.203108	-0.0412362	-0.507556	0.397934
FBgn0264950	FBgn0035227	CR44119	Iml1	0.259551	-0.0874897	0.259387	0.437011	0.140461	0.048059	0.0933151	0.166994	0.246734	-0.0089644	0.196705	0.175446
FBgn0264950	FBgn0040725	CR44119	CG13946	-0.0472755	0.182353	-0.117218	-0.394947	-0.0149081	-0.0392658	0.0283092	-0.264616	0.0191281	-0.0899001	-0.518996	0.0943396
FBgn0264950	FBgn0260874	CR44119	Ir76a	-0.0165796	0.224846	0.405061	0.605997	-0.286921	-0.159812	0.0677026	0.317767	-0.507043	0.170409	0.4892	-0.238197
FBgn0264950	FBgn0031307	CR44119	MFS3	0.503257	-0.314195	0.367147	-0.406083	0.519594	0.387467	0.164603	0.30479	0.458123	-0.242551	-0.322462	0.237514
FBgn0264950	FBgn0259748	CR44119	CG42397	-0.0866824	-0.67885	-0.209791	-0.505361	0.418807	0.39065	0.0140015	-0.174251	0.233672	-0.238197	-0.57005	0.385213
FBgn0264950	FBgn0040554	CR44119	CR17025	-0.503642	-0.379815	0.235581	-0.362714	-0.325142	-0.494402	-0.392043	0.252796	-0.562964	-0.214036	-0.182874	-0.636558
FBgn0264950	FBgn0034494	CR44119	CG10444	-0.522874	-0.691434	-0.718203	-0.661867	-0.286874	0.0413247	-0.283275	-0.663878	-0.25254	-0.486212	-0.680782	-0.191155
FBgn0264950	FBgn0015568	CR44119	alpha-Est1	-0.189717	-0.0986524	0.0427195	-0.34094	-0.212863	-0.435116	-0.0623239	-0.0305643	-0.446598	-0.139076	-0.4209	-0.456757
FBgn0264950	FBgn0260720	CR44119	CR42547	-0.0296143	0.308507	0.792538	0.877678	0.602259	0.848267	0.0320157	0.67583	0.549987	0.0642875	0.783232	0.856997
FBgn0264950	FBgn0035666	CR44119	Jon65Aii	0.18549	0.066577	-0.323423	-0.699009	0.686906	0.58681	0.0233928	-0.246393	0.622385	-0.0114403	-0.731239	0.539401
FBgn0264950	FBgn0031735	CR44119	CG11029	-0.0815529	0.0875918	0.249039	-0.0535389	0.539539	0.365434	-0.0484931	0.0771792	0.358064	-0.0230513	-0.0607872	0.294886
FBgn0264950	FBgn0036483	CR44119	CG12316	0.534394	0.179235	0.403337	0.670261	-0.0884588	0.0349444	0.138308	0.285836	-0.0623239	-0.00401264	0.562196	-0.128319
FBgn0264950	FBgn0032147	CR44119	IP3K1	0.45924	0.105432	0.875135	0.912589	0.355448	0.754171	0.265261	0.727397	0.282933	0.234782	0.88739	0.758644
FBgn0264950	FBgn0035667	CR44119	Jon65Ai	-0.148871	-0.558247	-0.222061	-0.384879	0.536328	0.480592	-0.139588	-0.262273	0.268164	-0.262529	-0.641083	0.455818
FBgn0264950	FBgn0029603	CR44119	CG14053	-0.163399	0.480068	-0.363528	-0.109611	-0.13911	0.0184531	-0.0942542	-0.520277	-0.476223	0.409716	0.0653974	0.00776914
FBgn0264950	FBgn0002869	CR44119	MtnB	0.29119	0.212336	0.472315	0.523536	0.294251	-0.0877862	0.143089	0.380944	0.236062	0.112951	0.473832	-0.0502006
FBgn0264950	FBgn0033451	CR44119	CG1665	-0.118387	-0.18294	-0.48596	-0.808879	-0.0801606	-0.312282	-0.147358	-0.558695	-0.234355	-0.0974985	-0.769487	-0.312729
FBgn0264950	FBgn0033205	CR44119	CG2064	-0.0147758	0.00265121	-0.254686	-0.319004	0.0955738	0.12097	0.0497738	-0.17169	-0.00759839	0.149834	-0.139332	0.228891
FBgn0264950	FBgn0051097	CR44119	CG31097	0.325732	0.787986	0.243462	0.101406	0.67001	0.66965	0.215999	0.212584	0.477931	0.311193	0.0442244	0.643729
FBgn0264950	FBgn0038674	CR44119	CG14285	-0.355324	0.0903963	0.223679	0.263753	0.605365	0.655279	-0.0266371	0.122599	0.465039	0.201315	0.354649	0.628703
FBgn0264950	FBgn0264721	CR44119	CR43989	0.262696	0.0939077	0.161276	0.19307	-0.548031	-0.770846	0.0808503	-0.0100743	-0.785794	-0.03526	0.0361991	-0.654316
FBgn0264950	FBgn0051664	CR44119	CG31664	-0.197285	0.0452823	-0.457734	-0.506476	-0.141844	-0.515746	-0.133527	-0.352173	-0.151626	-0.065312	-0.532741	-0.544182
FBgn0031484	FBgn0023507	CG3165	D2hgdh	-0.480918	-0.255789	0.0949968	0.302963	-0.375971	-0.14317	-0.447281	0.152822	-0.4641	0.047554	0.204303	-0.377102
FBgn0031484	FBgn0030629	CG3165	CG9123	0.0857295	0.404222	0.847297	0.0381031	0.200155	0.566931	0.144711	0.729361	0.182959	0.393324	-0.0322718	0.501836
FBgn0031484	FBgn0028543	CG3165	NimB2	-0.286477	0.402296	-0.634806	0.0779723	-0.233536	0.356846	-0.333732	-0.450354	-0.221293	0.252028	0.082814	0.203108
FBgn0031484	FBgn0259716	CG3165	CG42370	-0.132555	0.482258	0.134404	0.612976	0.20108	0.834181	-0.173995	-0.0476394	0.046871	0.401264	0.403398	0.441475
FBgn0031484	FBgn0052523	CG3165	CG32523	0.412478	-0.0721569	0.178871	0.491832	-0.149993	-0.241438	0.28336	-0.0976693	-0.196107	-0.0242466	0.393921	-0.0505421
FBgn0031484	FBgn0035496	CG3165	CG14990	0.276247	0.170035	0.0220773	0.623806	-0.0488576	0.374077	0.290959	-0.082814	-0.14326	0.171604	0.428157	0.257406
FBgn0031484	FBgn0052553	CG3165	CR32553	0.120025	0.0300571	0.404123	0.249242	0.0452855	-0.311568	0.119952	0.442414	-0.246137	0.256809	0.059848	-0.572185
FBgn0031484	FBgn0085732	CG3165	CR40190	-0.159789	-0.277871	-0.0207332	0.608853	-0.520088	-0.226309	-0.083497	-0.114061	-0.754717	-0.218987	0.437804	-0.530351
FBgn0031484	FBgn0004426	CG3165	LysC	0.00670746	0.555049	-0.250587	-0.0748153	-0.235553	-0.141483	8.54e-05	-0.491761	-0.559976	0.457453	-0.216085	-0.405191
FBgn0031484	FBgn0053282	CG3165	CG33282	0.300637	-0.332359	-0.319656	0.0923543	-0.417776	-0.333251	0.255784	-0.429608	-0.358747	-0.120464	0.0249296	-0.360796
FBgn0031484	FBgn0262887	CG3165	CR43242	-0.0350192	-0.500581	0.600271	0.86302	0.23395	0.487167	0.0835823	0.441475	0.169555	-0.431486	0.603603	0.266627
FBgn0031484	FBgn0261429	CG3165	CR42646	-0.362374	-0.0498857	-0.625266	-0.571017	-0.373643	-0.266019	-0.310595	-0.451379	-0.779903	0.28447	-0.356442	-0.564672
FBgn0031484	FBgn0030628	CG3165	CG9114	0.17914	0.591294	-0.403975	0.38339	0.414606	0.772058	0.272518	-0.00537864	0.539998	0.38786	0.285922	0.476991
FBgn0031484	FBgn0035767	CG3165	Cln7	-0.4462	0.441172	-0.637696	0.189485	-0.359376	0.357525	-0.343635	-0.519508	-0.425766	0.256467	0.0838385	0.202425
FBgn0031484	FBgn0030773	CG3165	CG9676	0.390059	-0.227862	0.169192	0.431524	-0.356181	-0.285379	0.299923	0.0328695	-0.394263	-0.105182	0.484846	-0.2627
FBgn0031484	FBgn0004872	CG3165	piwi	0.498032	0.475737	0.589591	0.142386	0.408146	0.610641	0.348246	0.548792	0.378724	-0.0640314	-0.159139	0.181422
FBgn0031484	FBgn0031726	CG3165	Cyp6a16	-0.377401	0.245302	0.0790054	0.0476127	0.0467626	0.434521	-0.396226	0.145223	0.0894732	0.0565184	0.0631777	0.468112
FBgn0031484	FBgn0039612	CG3165	CG14523	-0.202207	0.476333	-0.336673	-0.166543	-0.070498	0.342007	-0.231794	-0.263468	-0.136259	0.195936	-0.105182	0.188082
FBgn0031484	FBgn0039525	CG3165	CG5646	-0.343879	0.37656	-0.344279	0.348855	-0.251878	0.30465	-0.400324	-0.30496	-0.316742	0.180739	0.160932	0.138308
FBgn0031484	FBgn0263763	CG3165	CG43680	0.076049	0.34777	-0.30938	0.132804	0.110063	0.450673	0.0279177	-0.333988	0.0945957	0.489712	0.161615	0.420473
FBgn0031484	FBgn0037225	CG3165	TwdlG	0.401136	0.245062	-0.0477097	0.360061	0.0471529	0.0428119	0.255955	-0.190387	0.0214292	0.245027	0.273713	-0.0916076
FBgn0031484	FBgn0039886	CG3165	CG2003	-0.400535	-0.318261	-0.339673	-0.124722	0.0396966	0.0802947	-0.120806	-0.225647	-0.000853752	-0.0389311	-0.186459	0.0879365
FBgn0031484	FBgn0036787	CG3165	CG4306	-0.240173	-0.521352	-0.0901239	-0.316464	-0.150277	-0.44775	-0.184154	-0.039358	-0.283446	-0.278067	-0.339793	-0.475455
FBgn0031484	FBgn0030993	CG3165	Mec2	-0.409455	0.42563	-0.311609	0.250565	-0.0351496	0.603251	-0.280543	-0.213182	-0.109963	0.248698	0.158456	0.305558
FBgn0031484	FBgn0037230	CG3165	CG9780	-0.327885	0.129369	-0.262139	0.101395	0.0283375	0.695952	-0.338598	-0.253223	-0.114659	0.128404	-0.000512251	0.295228
FBgn0031484	FBgn0050428	CG3165	CG30428	0.141907	0.059742	-0.386002	-0.487903	-0.313934	-0.591011	0.0772646	-0.2878	-0.356185	0.225903	-0.34133	-0.538815
FBgn0031484	FBgn0267408	CG3165	AOX1	-0.327422	0.167098	0.275184	0.264948	0.228155	0.494203	-0.233074	0.187996	0.206864	0.0677026	0.142064	0.207462
FBgn0031484	FBgn0261509	CG3165	haf	-0.101352	0.15357	0.0569862	0.630924	-0.107104	0.456465	-0.147272	-0.0828993	-0.122684	0.244429	0.489968	0.133612
FBgn0031484	FBgn0262007	CG3165	CG42825	-0.373642	0.290341	0.274056	0.0603483	0.261704	0.326952	-0.292922	0.197558	0.334073	0.0549816	0.0949372	0.186459
FBgn0031484	FBgn0030600	CG3165	hiw	-0.536046	-0.497034	0.352094	0.449258	-0.362826	-0.116754	-0.315718	0.124477	-0.413301	-0.263895	0.276872	-0.312303
FBgn0031484	FBgn0037000	CG3165	ZnT77C	0.254162	0.546014	-0.231114	0.320465	0.0630454	0.471133	0.317169	-0.256296	0.120208	0.438743	0.18885	0.42201
FBgn0031484	FBgn0040342	CG3165	CG3706	0.319236	-0.0998541	-0.129521	-0.221074	0.0734358	0.192299	0.323145	-0.169128	0.0154529	0.01366	-0.280201	0.0822163
FBgn0031484	FBgn0030367	CG3165	Cyp311a1	-0.311241	0.365107	-0.459865	-0.067053	-0.107205	0.647228	-0.148894	-0.40835	-0.221976	0.151797	0.030479	0.283958
FBgn0031484	FBgn0027934	CG3165	alpha-Est4aPsi	0.298885	0.0130419	-0.531884	-0.000695602	-0.0716036	0.482981	0.179971	-0.623495	-0.0578844	0.144284	-0.119696	0.345343
FBgn0031484	FBgn0035243	CG3165	CG13926	-0.00524899	0.562473	-0.242807	0.0815604	0.373857	0.835398	-0.0172458	0.040041	0.444805	0.572868	0.0636045	0.542389
FBgn0031484	FBgn0034817	CG3165	Art7	-0.405265	0.453791	-0.579003	-0.0931851	0.00737043	0.614051	-0.176471	-0.449244	0.0477248	0.390421	-0.133783	0.196961
FBgn0031484	FBgn0014073	CG3165	Tie	-0.328458	-0.433351	-0.00566396	0.751063	-0.0770158	0.447396	-0.422863	-0.19918	-0.064629	-0.466576	0.681294	0.30496
FBgn0031484	FBgn0038173	CG3165	Adgf-C	-0.584141	0.239274	-0.19411	0.0983018	-0.351185	0.240456	-0.404764	-0.240246	-0.32545	0.00307351	0.0337232	-0.154956
FBgn0031484	FBgn0037975	CG3165	CG3397	0.0800595	0.404323	-0.53163	-0.353248	-0.149057	-0.370681	0.131905	-0.285324	-0.287117	0.377871	-0.311363	-0.330061
FBgn0031484	FBgn0032399	CG3165	CG6785	0.404798	-0.0696531	0.0437496	0.192412	-0.318934	-0.34945	0.314266	-0.116366	-0.488346	0.0258687	0.250832	-0.552207
FBgn0031484	FBgn0036550	CG3165	CG17026	-0.180787	-0.415352	-0.57451	-0.378778	-0.54952	-0.628362	-0.0560915	-0.493298	-0.607957	-0.228123	-0.503543	-0.602749
FBgn0031484	FBgn0035670	CG3165	CG10472	-0.423568	0.032739	-0.342801	-0.00189652	-0.226842	0.0360022	-0.368138	-0.441902	-0.356271	-0.0286861	-0.126099	-0.269188
FBgn0031484	FBgn0039777	CG3165	Jon99Fii	-0.193731	-0.146763	-0.0611234	0.058268	-0.278209	-0.109681	-0.109793	-0.214633	-0.46077	-0.201144	-0.126953	-0.380432
FBgn0031484	FBgn0002962	CG3165	nos	0.384776	0.572294	0.314201	0.0752422	0.246209	0.555645	0.301375	0.350551	0.3094	-0.0721421	-0.260224	0.323145
FBgn0031484	FBgn0037408	CG3165	NPFR	0.034394	0.457817	-0.334379	0.163642	0.283295	0.458345	-0.00443951	-0.29685	0.144113	0.367711	-0.120208	0.0827286
FBgn0031484	FBgn0039494	CG3165	grass	-0.177126	0.148156	-0.509275	-0.0978713	-0.585183	-0.297428	-0.190387	-0.421839	-0.59165	0.209084	-0.118586	-0.156664
FBgn0031484	FBgn0015036	CG3165	Cyp4ae1	-0.330043	0.235359	0.0335695	0.0160308	-0.172701	0.323872	-0.108512	0.0138308	-0.228976	0.151541	-0.122172	-0.0828993
FBgn0031484	FBgn0267828	CG3165	Fatp	-0.308342	0.495077	-0.508746	-0.442591	-0.349105	-0.259709	-0.179117	-0.47204	-0.404081	0.218475	-0.4711	-0.441134
FBgn0031484	FBgn0038034	CG3165	Cyp9f3	-0.248901	-0.37441	-0.140295	-0.176663	-0.36964	-0.446589	-0.113037	-0.153419	-0.449244	-0.304875	-0.263809	-0.263383
FBgn0031484	FBgn0022702	CG3165	Cht2	0.429019	0.752583	-0.519016	-0.255582	0.0564327	0.721698	0.447281	-0.12977	0.0652267	0.479894	-0.125502	0.17058
FBgn0031484	FBgn0032470	CG3165	CG5142	-0.238171	-0.729906	-0.528594	-0.378619	-0.698218	-0.52281	-0.24127	-0.508495	-0.744643	-0.438487	-0.404337	-0.769231
FBgn0031484	FBgn0069973	CG3165	CG40485	0.283477	0.468776	-0.385995	0.00371328	-0.497126	-0.6804	0.190301	-0.619824	-0.6007	0.234013	-0.0547255	-0.500213
FBgn0031484	FBgn0031141	CG3165	CG1304	-0.325678	0.108259	-0.287516	-0.283538	-0.500063	-0.236625	-0.307522	-0.21985	-0.690003	0.179117	-0.49368	-0.633655
FBgn0031484	FBgn0013771	CG3165	Cyp6a9	-0.221384	0.0107605	0.182018	-0.00360391	0.261475	0.0620046	-0.0747033	0.266371	0.30829	-0.0743618	0.0942542	0.385811
FBgn0031484	FBgn0031935	CG3165	CG13793	-0.316906	-0.567875	0.114176	0.177457	0.0423762	-0.138382	-0.272688	0.15931	-0.0317596	-0.313242	0.191582	0.102792
FBgn0031484	FBgn0029906	CG3165	xit	-0.125314	0.471049	-0.0485047	-0.0555782	-0.443044	0.194252	0.0432852	0.0881926	-0.368394	0.279689	-0.0808503	-0.113208
FBgn0031484	FBgn0035227	CG3165	Iml1	-0.443668	0.350334	0.0824262	0.654404	0.372445	0.690108	-0.261675	0.139759	0.279775	0.301716	0.416033	0.400666
FBgn0031484	FBgn0040725	CG3165	CG13946	0.183661	-0.275462	0.0939945	-0.0307862	0.173541	0.314151	0.136383	-0.00565829	0.172794	-0.492103	0.0295398	0.16153
FBgn0031484	FBgn0260874	CG3165	Ir76a	0.0273019	0.464116	-0.650086	-0.116474	0.770528	0.721955	0.0758132	-0.524289	0.781269	0.430035	-0.231623	0.684709
FBgn0031484	FBgn0031307	CG3165	MFS3	-0.54723	-0.158897	-0.0328643	0.217431	-0.197982	0.42579	-0.332963	-0.221122	-0.247588	0.0125502	-0.0086229	0.161701
FBgn0031484	FBgn0259748	CG3165	CG42397	-0.396742	0.104051	-0.322106	-0.138226	-0.421897	-0.191952	-0.307948	-0.242466	-0.483907	-0.169128	-0.241014	-0.403142
FBgn0031484	FBgn0040554	CG3165	CR17025	0.599249	0.21918	-0.715049	-0.735669	0.1193	-0.123925	0.401007	-0.570563	0.1115	-0.00273201	-0.576624	0.109707
FBgn0031484	FBgn0034494	CG3165	CG10444	0.299472	0.400412	0.118997	-0.237853	0.123917	0.359552	0.296252	0.266456	0.0657389	0.115427	-0.216853	-0.0852898
FBgn0031484	FBgn0015568	CG3165	alpha-Est1	-0.426709	0.0488621	-0.422368	0.0941585	0.370429	0.784967	-0.188679	-0.449074	0.456757	0.0486639	-0.0919491	0.409716
FBgn0031484	FBgn0260720	CG3165	CR42547	-0.312658	-0.327407	-0.0909797	0.146669	-0.333448	-0.0564382	-0.183898	-0.362503	-0.3094	-0.377273	0.0900709	-0.446
FBgn0031484	FBgn0035666	CG3165	Jon65Aii	-0.420996	-0.682967	-0.134704	0.0203825	-0.316672	-0.0736823	-0.399044	-0.157603	-0.41629	-0.46521	-0.112354	-0.296081
FBgn0031484	FBgn0031735	CG3165	CG11029	-0.0537652	0.189974	-0.502593	0.295701	-0.421287	0.325358	-0.0138308	-0.559378	-0.491164	-0.0189533	0.208999	0.121233
FBgn0031484	FBgn0036483	CG3165	CG12316	0.0638676	0.44743	0.443086	0.619232	0.443183	0.823858	0.0994621	0.535303	0.415863	0.226586	0.568087	0.635021
FBgn0031484	FBgn0032147	CG3165	IP3K1	-0.0464768	0.622955	-0.205978	0.298158	-0.086445	0.0635809	-0.0218561	-0.204132	0.0754717	0.604798	0.211218	-0.193716
FBgn0031484	FBgn0035667	CG3165	Jon65Ai	-0.290577	-0.0953876	-0.344178	-0.130708	-0.540613	-0.181848	-0.207206	-0.403569	-0.613762	-0.0851191	-0.387262	-0.363698
FBgn0031484	FBgn0029603	CG3165	CG14053	0.0991117	0.281464	0.191158	-0.326762	0.0327563	-0.742222	0.120464	0.347648	0.123538	0.311022	-0.131307	-0.427815
FBgn0031484	FBgn0002869	CG3165	MtnB	0.194099	-0.302025	0.161906	0.585019	-0.218349	0.307848	0.100231	0.146589	-0.129685	-0.219585	0.526594	0.169726
FBgn0031484	FBgn0033451	CG3165	CG1665	-0.324142	-0.029263	-0.341779	-0.302665	-0.194589	0.112925	-0.140613	-0.125502	-0.2265	0.0740203	-0.344489	-0.10578
FBgn0031484	FBgn0033205	CG3165	CG2064	-0.0979314	0.589101	-0.471076	-0.562192	-0.502393	-0.309896	-0.173397	-0.498506	-0.563135	0.480065	-0.449927	-0.319645
FBgn0031484	FBgn0051097	CG3165	CG31097	-0.212511	-0.378333	-0.172962	0.279241	-0.630157	-0.583264	-0.267054	-0.297362	-0.636302	-0.200717	0.0747887	-0.605054
FBgn0031484	FBgn0038674	CG3165	CG14285	0.0658944	0.45936	-0.656741	-0.315131	-0.578754	-0.470411	0.00597627	-0.606506	-0.625971	0.429011	-0.256382	-0.621105
FBgn0031484	FBgn0264721	CG3165	CR43989	-0.0418539	-0.593211	0.464121	0.269312	0.537134	0.233426	0.00017075	0.313498	0.573295	-0.426108	0.061897	0.273286
FBgn0031484	FBgn0051664	CG3165	CG31664	-0.276973	-0.369461	0.480084	-0.00616271	-0.0516704	-0.0145096	-0.184496	0.39708	-0.0684709	-0.193546	0.0333817	0.181593
FBgn0023507	FBgn0030629	D2hgdh	CG9123	-0.45255	0.169099	0.171227	-0.437327	0.409692	-0.534006	-0.446683	0.23777	0.453855	0.251174	-0.242722	-0.273457
FBgn0023507	FBgn0028543	D2hgdh	NimB2	0.825445	0.720621	0.512699	0.636493	0.68119	0.40764	0.608469	0.454623	0.733202	0.705882	0.547426	0.46077
FBgn0023507	FBgn0259716	D2hgdh	CG42370	0.839815	0.596994	0.731976	0.709858	0.347173	0.00837103	0.653462	0.36293	0.486383	0.507726	0.560318	0.115598
FBgn0023507	FBgn0052523	D2hgdh	CG32523	-0.152562	-0.278257	-0.0337963	0.0462329	0.307489	0.0189849	-0.112951	0.0858875	0.33339	-0.354819	0.166055	0.237428
FBgn0023507	FBgn0035496	D2hgdh	CG14990	0.0401426	-0.428943	0.381975	0.683914	0.475536	0.0695297	0.0237343	0.341928	0.454025	-0.367796	0.582771	0.15709
FBgn0023507	FBgn0052553	D2hgdh	CR32553	0.0434575	-0.0957769	0.25598	0.219924	0.428868	0.211673	-0.31973	0.109707	0.363101	-0.147272	0.163579	0.458636
FBgn0023507	FBgn0085732	D2hgdh	CR40190	0.606303	0.395543	0.474629	0.117799	0.514152	0.411706	0.469393	0.22983	0.538291	0.206864	-0.0504568	0.348672
FBgn0023507	FBgn0004426	D2hgdh	LysC	0.405635	0.0234191	0.302813	0.264091	0.557524	0.366017	0.336778	0.195765	0.641339	0.0804833	0.245283	0.384274
FBgn0023507	FBgn0053282	D2hgdh	CG33282	-0.00748713	-0.220003	0.240092	0.246765	0.851117	0.629544	-0.0897294	0.160932	0.743106	-0.0572868	0.205071	0.572953
FBgn0023507	FBgn0262887	D2hgdh	CR43242	-0.258653	0.0348698	0.45439	0.229024	0.232128	-0.0653576	-0.31862	0.315376	0.178093	-0.00785452	0.202852	0.0642022
FBgn0023507	FBgn0261429	D2hgdh	CR42646	0.591566	0.155488	0.258217	0.164099	0.327968	0.257972	0.510544	0.220097	0.502433	0.12166	0.0788013	0.44361
FBgn0023507	FBgn0030628	D2hgdh	CG9114	0.113517	0.373856	-0.267242	0.246371	-0.566112	0.25577	-0.146675	-0.0331256	-0.562452	0.442329	0.200973	0.0831555
FBgn0023507	FBgn0035767	D2hgdh	Cln7	0.855269	0.662337	0.353312	0.47814	0.746965	0.0618106	0.568855	0.316998	0.688295	0.591992	0.485785	0.350465
FBgn0023507	FBgn0030773	D2hgdh	CG9676	-0.223182	-0.260218	-0.0639567	0.24352	0.588445	0.195068	-0.230086	0.166396	0.461112	-0.305387	0.292239	0.273628
FBgn0023507	FBgn0004872	D2hgdh	piwi	-0.784559	-0.381861	-0.114735	-0.219901	-0.564332	0.0462922	-0.619995	-0.0439682	-0.55639	-0.518996	-0.21156	-0.225817
FBgn0023507	FBgn0031726	D2hgdh	Cyp6a16	0.821361	0.565708	0.276684	0.585651	0.222568	-0.338469	0.615043	0.245966	0.061214	0.591821	0.513873	-0.152224
FBgn0023507	FBgn0039612	D2hgdh	CG14523	0.735472	0.49053	0.161233	0.579572	0.403135	0.214728	0.512251	0.145223	0.390762	0.396141	0.483309	0.298216
FBgn0023507	FBgn0039525	D2hgdh	CG5646	0.861644	0.631731	0.32187	0.381852	0.559388	0.0654642	0.579783	0.370358	0.545121	0.582686	0.299326	0.326219
FBgn0023507	FBgn0263763	D2hgdh	CG43680	0.469056	0.213429	0.458633	0.108882	0.14552	-0.14691	0.459746	0.26953	0.145138	0.385981	0.110902	-0.109793
FBgn0023507	FBgn0037225	D2hgdh	TwdlG	-0.0455329	-0.296561	0.382696	0.048562	0.142918	0.256949	0.0241612	0.22633	0.316571	-0.139076	0.0332963	0.309144
FBgn0023507	FBgn0039886	D2hgdh	CG2003	0.150184	0.30905	-0.00639858	0.164904	-0.00422685	-0.201035	0.0103304	0.0350892	0.00324426	0.197388	0.241697	-0.111927
FBgn0023507	FBgn0036787	D2hgdh	CG4306	0.39749	-0.114975	-0.232646	-0.0332544	0.0885198	0.0764393	0.249979	-0.00734227	0.122172	0.0149407	0.0389311	0.233672
FBgn0023507	FBgn0030993	D2hgdh	Mec2	0.898685	0.664259	0.502687	0.70458	0.614755	0.269693	0.602834	0.554	0.651071	0.615811	0.574661	0.423632
FBgn0023507	FBgn0037230	D2hgdh	CG9780	0.943534	0.906887	0.844513	0.764325	0.666925	0.31882	0.796892	0.643132	0.735678	0.868522	0.699138	0.460002
FBgn0023507	FBgn0050428	D2hgdh	CG30428	0.266789	0.0735771	-0.155865	-0.134619	0.302078	0.244747	0.246991	-0.0457611	0.182532	-0.0506275	-0.149492	0.279653
FBgn0023507	FBgn0267408	D2hgdh	AOX1	0.913131	0.892748	0.891024	0.814471	0.367566	0.234447	0.790575	0.793904	0.419534	0.817212	0.728165	0.394604
FBgn0023507	FBgn0261509	D2hgdh	haf	0.781403	0.615849	0.31808	0.0236062	0.564947	0.180668	0.64168	0.157603	0.510629	0.393921	0.0245881	0.104585
FBgn0023507	FBgn0262007	D2hgdh	CG42825	0.903775	0.856497	0.603795	0.771124	0.344396	0.327077	0.726116	0.47665	0.23427	0.677111	0.557756	0.252881
FBgn0023507	FBgn0030600	D2hgdh	hiw	0.891982	0.422773	0.682495	0.700295	0.811726	0.492889	0.653718	0.532571	0.682404	0.22872	0.527875	0.529326
FBgn0023507	FBgn0037000	D2hgdh	ZnT77C	-0.164574	-0.0720519	0.573835	0.462019	0.124699	0.0214881	0.0397849	0.327329	0.317852	-0.046871	0.246734	0.0408094
FBgn0023507	FBgn0040342	D2hgdh	CG3706	-0.196428	-0.201362	-0.0526078	0.335818	0.246302	-0.193735	-0.31734	-0.0519081	0.166482	-0.260907	0.324938	-0.0104158
FBgn0023507	FBgn0030367	D2hgdh	Cyp311a1	0.706837	0.639573	0.251932	0.678427	0.46392	0.127151	0.357978	0.370016	0.463075	0.552292	0.585674	0.284043
FBgn0023507	FBgn0027934	D2hgdh	alpha-Est4aPsi	-0.16081	-0.356621	0.311063	0.411742	0.431285	-0.413292	0.00443951	0.142662	0.353539	-0.14898	0.256467	-0.0611287
FBgn0023507	FBgn0035243	D2hgdh	CG13926	0.374386	0.0517552	-0.00412869	0.018161	-0.0739276	0.00168484	0.421497	0.0676172	-0.270213	0.322718	-0.0191241	-0.203108
FBgn0023507	FBgn0034817	D2hgdh	Art7	0.611339	0.505583	-0.224502	0.545168	0.208185	0.403733	0.343465	-0.0904124	0.198583	0.559635	0.384359	0.380859
FBgn0023507	FBgn0014073	D2hgdh	Tie	0.480645	0.431345	0.306927	0.223425	0.463348	-0.126804	0.306839	0.212328	0.358747	0.308888	0.185606	-0.00563476
FBgn0023507	FBgn0038173	D2hgdh	Adgf-C	0.759456	0.645278	0.513891	0.580441	0.631532	0.03992	0.525058	0.289593	0.583198	0.531461	0.278067	0.177068
FBgn0023507	FBgn0037975	D2hgdh	CG3397	0.189666	0.507004	-0.106091	0.451135	0.145094	0.283966	0.161445	0.215829	0.22744	0.492188	0.431401	0.532229
FBgn0023507	FBgn0032399	D2hgdh	CG6785	-0.288695	0.171724	0.120841	-0.321511	0.385783	0.430305	-0.0790575	0.197217	0.512934	0.0402117	-0.156237	0.490139
FBgn0023507	FBgn0036550	D2hgdh	CG17026	0.162545	-0.215229	-0.0987063	0.286751	0.509751	0.14278	-0.000853752	0.00580551	0.430974	-0.231964	0.156322	0.344489
FBgn0023507	FBgn0035670	D2hgdh	CG10472	0.73915	0.469971	0.0838461	0.548989	0.619871	0.361099	0.629728	0.0521643	0.55861	0.381713	0.419875	0.31845
FBgn0023507	FBgn0039777	D2hgdh	Jon99Fii	0.123033	-0.216856	-0.0178014	0.295547	0.522122	0.284217	-0.0839238	-0.105268	0.414155	-0.284385	0.176727	0.247161
FBgn0023507	FBgn0002962	D2hgdh	nos	-0.651157	-0.392306	-0.000101266	-0.315449	-0.445063	-0.00810936	-0.511654	0.0017075	-0.450867	-0.479638	-0.204303	-0.456245
FBgn0023507	FBgn0037408	D2hgdh	NPFR	0.140497	-0.218864	0.0422534	0.803661	0.0865092	0.173859	0.22411	0.0135747	0.18885	-0.0983523	0.48809	0.246734
FBgn0023507	FBgn0039494	D2hgdh	grass	0.700123	0.732039	0.404682	0.787115	0.782826	0.704971	0.608384	0.40835	0.666012	0.643302	0.687783	0.663109
FBgn0023507	FBgn0015036	D2hgdh	Cyp4ae1	0.829153	0.717504	0.657303	0.731488	0.627834	0.388574	0.525485	0.58593	0.615641	0.54384	0.59737	0.475625
FBgn0023507	FBgn0267828	D2hgdh	Fatp	0.535783	0.322195	0.241779	0.24336	0.517547	0.589392	0.305814	0.134039	0.48015	0.102792	0.22633	0.500299
FBgn0023507	FBgn0038034	D2hgdh	Cyp9f3	0.00603634	-0.00727084	-0.0543451	0.33663	0.255498	0.0845549	-0.046871	0.129856	0.27636	-0.0454196	0.393409	0.217621
FBgn0023507	FBgn0022702	D2hgdh	Cht2	-0.162826	0.00663968	-0.055234	0.664265	-0.194543	0.394231	-0.177837	0.100231	-0.0553231	0.187996	0.534107	0.328182
FBgn0023507	FBgn0032470	D2hgdh	CG5142	0.423483	0.28394	0.313677	0.184748	0.74402	0.471854	0.369589	0.259968	0.589004	0.0824725	0.133441	0.567831
FBgn0023507	FBgn0069973	D2hgdh	CG40485	0.0389242	-0.639349	-0.0585758	-0.472144	0.543034	0.0142062	0.00939127	-0.098523	0.537608	-0.440024	-0.340733	0.197644
FBgn0023507	FBgn0031141	D2hgdh	CG1304	0.724625	0.509557	-0.0333728	0.166806	0.671728	0.558291	0.661402	0.146139	0.623837	0.494066	0.210198	0.490225
FBgn0023507	FBgn0013771	D2hgdh	Cyp6a9	0.171273	0.230473	0.143989	0.219447	-0.155511	-0.221537	0.0701784	0.185947	-0.237514	0.149151	0.225476	-0.159993
FBgn0023507	FBgn0031935	D2hgdh	CG13793	0.522797	0.522699	0.00872161	0.196965	0.0339063	-0.149445	0.429096	-0.0383335	-0.0248442	0.400239	0.214719	-0.0108427
FBgn0023507	FBgn0029906	D2hgdh	xit	-0.0501917	0.490456	0.053322	0.655216	0.617463	0.476782	-0.12183	0.0630923	0.540852	0.40613	0.533083	0.412277
FBgn0023507	FBgn0035227	D2hgdh	Iml1	0.939242	0.58622	0.778563	0.665711	0.184394	0.176965	0.752156	0.491164	0.273371	0.603688	0.458038	0.323657
FBgn0023507	FBgn0040725	D2hgdh	CG13946	-0.185099	0.139959	0.0912361	0.239689	-0.0045418	-0.313917	-0.313811	0.00898938	0.119594	-0.0429437	0.190984	0.115598
FBgn0023507	FBgn0260874	D2hgdh	Ir76a	0.412175	0.096361	-0.159843	-0.00027999	-0.403762	-0.438346	0.304192	-0.227269	-0.491249	0.102963	-0.114232	-0.390421
FBgn0023507	FBgn0031307	D2hgdh	MFS3	0.751961	0.72729	0.371412	0.560924	0.490699	0.13144	0.395543	0.231452	0.457526	0.554	0.363272	0.20712
FBgn0023507	FBgn0259748	D2hgdh	CG42397	0.361112	-0.117276	-0.232039	0.498021	0.573296	0.38477	0.180398	-0.065312	0.465807	-0.239734	0.316144	0.435158
FBgn0023507	FBgn0040554	D2hgdh	CR17025	-0.182548	-0.494252	0.14418	0.0385345	-0.0984975	-0.193426	-0.222915	-0.0458465	-0.173141	-0.432938	0.106548	-0.237514
FBgn0023507	FBgn0034494	D2hgdh	CG10444	-0.535965	-0.372128	-0.0219332	0.223203	-0.325959	0.0294863	-0.482541	0.0127209	-0.351831	-0.273371	0.161103	-0.105182
FBgn0023507	FBgn0015568	D2hgdh	alpha-Est1	0.45035	0.783223	-0.0201896	0.757435	0.00143827	-0.0870803	0.210279	0.0682148	-0.0519081	0.646717	0.631094	0.097157
FBgn0023507	FBgn0260720	D2hgdh	CR42547	0.16685	-0.213928	0.215099	-0.3332	0.520515	0.353119	0.101426	0.0218561	0.387006	-0.217621	-0.260565	0.379664
FBgn0023507	FBgn0035666	D2hgdh	Jon65Aii	0.402922	0.0492733	-0.0305921	0.27264	0.577745	0.223708	0.40041	-0.0647144	0.492274	0.0890464	0.221207	0.286007
FBgn0023507	FBgn0031735	D2hgdh	CG11029	0.661432	0.769106	0.193876	0.631699	0.653045	0.139647	0.375736	0.236575	0.489456	0.680697	0.496628	0.37087
FBgn0023507	FBgn0036483	D2hgdh	CG12316	0.0357519	0.122201	0.268757	-0.197374	-0.340847	0.0427553	-0.106036	0.21839	-0.305985	0.0950226	-0.123367	-0.329292
FBgn0023507	FBgn0032147	D2hgdh	IP3K1	0.153458	0.101441	0.226621	-0.0723223	0.282134	0.313942	-0.0683002	0.170921	0.294801	0.058482	-0.124392	0.412362
FBgn0023507	FBgn0035667	D2hgdh	Jon65Ai	0.270579	-0.279057	-0.277025	0.498069	0.670389	0.382652	0.083497	-0.282677	0.461965	-0.0683002	0.36071	0.375224
FBgn0023507	FBgn0029603	D2hgdh	CG14053	-0.300869	-0.176749	0.107777	-0.386517	0.0348854	-0.124419	-0.397507	0.0759839	-0.0809357	0.0108427	-0.314778	0.235209
FBgn0023507	FBgn0002869	D2hgdh	MtnB	-0.0625293	0.141529	-0.13799	-0.0717378	0.24788	-0.0213158	0.00119525	0.015709	0.240246	-0.0239904	-0.141552	-0.180142
FBgn0023507	FBgn0033451	D2hgdh	CG1665	0.403195	0.353507	-0.226845	0.187194	0.15553	0.325127	0.219841	-0.0577137	0.111415	0.24921	0.31179	0.318108
FBgn0023507	FBgn0033205	D2hgdh	CG2064	0.663374	0.427417	0.0741018	0.322971	0.240351	0.197113	0.511654	0.0440536	0.274737	0.474772	0.234611	0.305985
FBgn0023507	FBgn0051097	D2hgdh	CG31097	0.591273	0.404986	0.220551	0.177713	0.703123	0.650897	0.564245	0.0700077	0.558098	0.31751	0.0540425	0.498591
FBgn0023507	FBgn0038674	D2hgdh	CG14285	0.364811	0.108873	0.0830209	-0.295851	0.771573	0.541262	0.213865	0.08418	0.636728	0.157859	-0.153675	0.540937
FBgn0023507	FBgn0264721	D2hgdh	CR43989	0.0151193	0.251878	0.0754649	-0.0472011	-0.547806	-0.618896	-0.182874	0.0825578	-0.583881	0.0834116	-0.0541279	-0.368223
FBgn0023507	FBgn0051664	D2hgdh	CG31664	0.418876	0.461755	0.377455	0.468199	0.247809	0.0426161	0.466319	0.237941	0.19918	0.380944	0.41535	0.180654
FBgn0030629	FBgn0028543	CG9123	NimB2	-0.512354	0.316472	-0.564597	-0.306774	0.426534	-0.127668	-0.699479	-0.318876	0.232391	0.250149	-0.19218	0.000512251
FBgn0030629	FBgn0259716	CG9123	CG42370	-0.441709	0.353461	0.113391	-0.0933133	0.894548	0.21466	-0.678135	-0.108341	0.434731	0.296935	-0.110902	0.169982
FBgn0030629	FBgn0052523	CG9123	CG32523	-0.309406	-0.352711	0.158317	0.564782	0.169877	0.434592	-0.162554	-0.0411509	0.0269786	-0.162298	0.253735	0.452318
FBgn0030629	FBgn0035496	CG9123	CG14990	-0.464785	-0.384662	0.156478	-0.257142	0.427563	0.446786	-0.351831	0.0131478	0.132758	-0.0770085	-0.12166	0.520191
FBgn0030629	FBgn0052553	CG9123	CR32553	-0.0525592	-0.124757	0.377902	-0.181812	0.245918	-0.131551	0.158883	0.431743	0.044139	0.125843	-0.171604	-0.322718
FBgn0030629	FBgn0085732	CG9123	CR40190	-0.0900373	-0.080879	0.198872	0.28298	0.126805	-0.546973	-0.201229	-0.0379066	0.162298	-0.00683002	0.31845	-0.691795
FBgn0030629	FBgn0004426	CG9123	LysC	-0.597587	0.386317	-0.253327	0.147129	0.427738	-0.405118	-0.652716	-0.491249	0.337232	0.322318	0.13993	-0.648083
FBgn0030629	FBgn0053282	CG9123	CG33282	-0.121628	-0.479755	-0.442933	0.244447	0.594284	-0.890913	-0.000768377	-0.447878	0.466405	-0.34594	0.150943	-0.464014
FBgn0030629	FBgn0262887	CG9123	CR43242	0.444111	-0.241725	0.754677	-0.079627	0.490551	0.0480813	0.533254	0.484163	0.290276	-0.133783	-0.131392	0.125758
FBgn0030629	FBgn0261429	CG9123	CR42646	-0.230312	0.10292	-0.474709	0.0338648	0.0448066	-0.422245	-0.130539	-0.38009	0.0361991	0.165457	0.200632	-0.590711
FBgn0030629	FBgn0030628	CG9123	CG9114	-0.0229823	0.236403	-0.621789	0.275915	-0.44769	0.0927175	-0.0620678	-0.256296	-0.367626	0.27636	0.15248	-0.0252711
FBgn0030629	FBgn0035767	CG9123	Cln7	-0.547635	0.191084	-0.502332	-0.327787	0.512468	-0.164364	-0.609579	-0.32545	0.19901	0.277726	-0.166994	-0.0825578
FBgn0030629	FBgn0030773	CG9123	CG9676	-0.149201	-0.436266	0.330807	-0.018389	0.166521	0.0978346	0.00845215	0.264151	0.100572	-0.208913	-0.200803	0.137113
FBgn0030629	FBgn0004872	CG9123	piwi	0.404477	-0.0466422	0.455344	0.0427601	-0.326452	0.188745	0.433194	0.329548	-0.366943	-0.402715	-0.00870827	0.420814
FBgn0030629	FBgn0031726	CG9123	Cyp6a16	-0.556542	0.275098	0.170992	-0.512184	0.138228	0.484396	-0.53129	0.271579	-0.0938274	0.218304	-0.603944	0.612823
FBgn0030629	FBgn0039612	CG9123	CG14523	-0.584764	-0.0771324	-0.255776	-0.648464	0.216891	0.172721	-0.608896	-0.253564	-0.0490908	-0.090327	-0.422693	0.294801
FBgn0030629	FBgn0039525	CG9123	CG5646	-0.319004	0.371429	-0.185174	0.184024	0.350607	-0.2029	-0.470247	-0.0398702	0.209425	0.326304	0.0145992	-0.149663
FBgn0030629	FBgn0263763	CG9123	CG43680	-0.642878	0.388535	-0.368464	0.282219	0.563656	0.170685	-0.77239	-0.292239	0.208401	0.523862	0.177239	0.191155
FBgn0030629	FBgn0037225	CG9123	TwdlG	-0.480101	-0.16989	0.172496	0.322426	0.6501	-0.415712	-0.436353	0.0560061	0.482968	0.116537	0.173397	-0.348587
FBgn0030629	FBgn0039886	CG9123	CG2003	-0.0498371	-0.256711	-0.322986	-0.551591	-0.329618	0.279225	0.0630069	-0.260821	-0.383249	-0.0822163	-0.345514	0.548707
FBgn0030629	FBgn0036787	CG9123	CG4306	-0.0657035	-0.0962284	-0.00240761	-0.446165	-0.287266	0.0196804	-0.029113	-0.0737642	-0.459148	0.0894732	-0.28558	0.130624
FBgn0030629	FBgn0030993	CG9123	Mec2	-0.44975	0.170074	-0.302681	-0.0563554	0.772193	-0.0599516	-0.683258	-0.082131	0.442585	0.157005	-0.104585	-0.0946811
FBgn0030629	FBgn0037230	CG9123	CG9780	-0.442477	0.353052	-0.155919	-0.141227	0.82239	0.033659	-0.571758	-0.116025	0.482968	0.244685	-0.101255	-0.00845215
FBgn0030629	FBgn0050428	CG9123	CG30428	-0.092582	0.190653	-0.564941	0.115913	0.0384756	-0.296998	-0.325365	-0.367626	0.112183	0.355332	0.139503	-0.0580564
FBgn0030629	FBgn0267408	CG9123	AOX1	-0.310572	0.0955343	0.28178	-0.315505	0.750865	-0.0729047	-0.447878	0.307436	0.432938	0.14343	-0.2627	-0.147358
FBgn0030629	FBgn0261509	CG9123	haf	-0.465734	0.450832	0.0555075	0.432703	0.760392	-0.16891	-0.706565	-0.0755571	0.603774	0.362162	0.358491	-0.294203
FBgn0030629	FBgn0262007	CG9123	CG42825	-0.305401	0.0452466	0.136148	-0.32615	0.429266	0.0770803	-0.51541	0.060531	0.308119	0.0741057	-0.225476	0.104755
FBgn0030629	FBgn0030600	CG9123	hiw	-0.360681	-0.567139	0.484626	-0.448017	0.531372	-0.6739	-0.223171	0.345087	0.445403	-0.196619	-0.325109	-0.606335
FBgn0030629	FBgn0037000	CG9123	ZnT77C	-0.486283	0.0628819	-0.273937	-0.29331	0.411871	0.112642	-0.55178	-0.116366	0.494408	0.150431	-0.111927	-0.0159652
FBgn0030629	FBgn0040342	CG9123	CG3706	-0.13286	-0.220492	-0.102815	-0.360248	0.299485	0.272602	0.029796	-0.0286007	-0.0611287	-0.140869	-0.238026	0.339537
FBgn0030629	FBgn0030367	CG9123	Cyp311a1	-0.5012	0.0647816	-0.348373	-0.270794	0.31667	0.4472	-0.402117	-0.245966	0.0208316	0.0321865	-0.13421	0.329804
FBgn0030629	FBgn0027934	CG9123	alpha-Est4aPsi	-0.338547	-0.370753	-0.445314	-0.0294523	0.622243	0.21845	-0.147358	-0.486724	0.296508	-0.0348331	0.0783745	0.440109
FBgn0030629	FBgn0035243	CG9123	CG13926	-0.535506	0.430429	-0.240438	0.673879	0.109475	0.472248	-0.671305	-0.0112695	-0.115257	0.603859	0.490481	0.542474
FBgn0030629	FBgn0034817	CG9123	Art7	-0.556132	0.302743	-0.387873	0.0498018	0.06421	-0.0810788	-0.527277	-0.359003	-0.0939127	0.2913	0.0569453	-0.237685
FBgn0030629	FBgn0014073	CG9123	Tie	0.130099	-0.282058	0.160081	0.291972	0.299269	0.090036	0.324853	0.0117818	0.229745	-0.25587	0.131905	0.0330402
FBgn0030629	FBgn0038173	CG9123	Adgf-C	-0.18307	0.0271782	-0.17545	-0.374852	0.167731	-0.285887	-0.140528	-0.0975839	0.0566038	0.117818	-0.175446	-0.421668
FBgn0030629	FBgn0037975	CG9123	CG3397	-0.405864	0.0749924	-0.618914	-0.466691	-0.313627	0.00893834	-0.274823	-0.355076	-0.342952	0.172373	-0.171348	0.17058
FBgn0030629	FBgn0032399	CG9123	CG6785	0.385996	0.34254	-0.0187639	0.683867	0.214485	-0.708804	0.296423	-0.14215	0.405959	0.474942	0.554256	-0.633911
FBgn0030629	FBgn0036550	CG9123	CG17026	-0.158658	-0.428567	-0.598346	-0.351342	0.000739891	-0.170374	-0.0688978	-0.494237	-0.160249	-0.219244	-0.191497	-0.0133185
FBgn0030629	FBgn0035670	CG9123	CG10472	-0.444704	0.152303	-0.155276	-0.106872	0.497979	-0.439891	-0.471357	-0.273115	0.219073	0.128404	-0.0744472	-0.340733
FBgn0030629	FBgn0039777	CG9123	Jon99Fii	0.0228729	-0.315708	0.0408156	-0.213769	0.427942	-0.537065	0.212499	-0.0737642	0.245966	-0.159908	-0.154444	-0.500982
FBgn0030629	FBgn0002962	CG9123	nos	0.544529	0.000117888	0.236077	-0.0138423	-0.441731	0.240496	0.453257	0.19918	-0.290276	-0.108768	-0.0251857	0.586699
FBgn0030629	FBgn0037408	CG9123	NPFR	-0.27294	0.0594066	-0.0262203	-0.214595	0.442777	-0.171798	-0.366004	-0.141211	0.190984	0.152309	0.00247588	-0.0777768
FBgn0030629	FBgn0039494	CG9123	grass	-0.691758	0.215236	-0.547872	-0.34416	0.0482263	-0.383285	-0.606164	-0.289081	0.03526	0.23555	-0.146931	-0.0634338
FBgn0030629	FBgn0015036	CG9123	Cyp4ae1	-0.42286	-0.323772	-0.0619421	-0.66672	0.476415	-0.377338	-0.375736	0.146419	0.190643	-0.060531	-0.43789	-0.417399
FBgn0030629	FBgn0267828	CG9123	Fatp	-0.617215	0.0389501	-0.478357	-0.342226	0.0638631	-0.825186	-0.521216	-0.363698	-0.146333	0.00461026	-0.0945104	-0.457099
FBgn0030629	FBgn0038034	CG9123	Cyp9f3	-0.00697893	-0.765054	-0.306346	-0.723411	-0.293352	-0.0386118	0.0613848	-0.130112	-0.374456	-0.516179	-0.464185	0.212072
FBgn0030629	FBgn0022702	CG9123	Cht2	-0.453636	-0.001658	-0.56713	-0.313391	-0.314577	0.0722808	-0.287032	-0.159225	-0.0702638	0.107231	-0.0892171	0.0351746
FBgn0030629	FBgn0032470	CG9123	CG5142	-0.125294	-0.164317	-0.447223	0.00406586	0.168322	-0.736951	-0.046188	-0.454367	0.15692	-0.00153675	0.190984	-0.532741
FBgn0030629	FBgn0069973	CG9123	CG40485	-0.420847	-0.00663426	-0.42147	0.300106	0.00430747	-0.57661	-0.451976	-0.505677	0.0391872	0.0276616	0.352002	-0.31401
FBgn0030629	FBgn0031141	CG9123	CG1304	-0.566611	0.504765	-0.316672	-0.262523	0.276376	-0.655167	-0.568087	-0.257772	0.306497	0.292496	-0.227964	-0.74507
FBgn0030629	FBgn0013771	CG9123	Cyp6a9	0.117793	-0.604831	0.213857	-0.419017	-0.307823	0.490108	0.272347	0.381713	-0.485017	-0.354307	-0.571587	0.778281
FBgn0030629	FBgn0031935	CG9123	CG13793	-0.277564	0.0784767	0.24697	-0.321696	-0.07989	0.361386	-0.151029	0.343208	-0.380347	0.0922906	-0.466661	0.603347
FBgn0030629	FBgn0029906	CG9123	xit	-0.306409	0.249033	0.00117338	-0.657144	0.185183	-0.603978	-0.227781	0.104329	0.151883	0.219841	-0.435841	-0.466234
FBgn0030629	FBgn0035227	CG9123	Iml1	-0.524911	0.443466	0.202179	-0.110917	0.600954	0.10397	-0.662426	0.196875	0.341159	0.354819	0.0303082	-0.00623239
FBgn0030629	FBgn0040725	CG9123	CG13946	0.53501	-0.154839	0.060618	-0.40097	0.139926	0.578479	0.719003	0.0766151	0.252508	-0.217536	-0.279518	0.150687
FBgn0030629	FBgn0260874	CG9123	Ir76a	-0.552508	0.330386	-0.520506	0.413629	0.0886506	0.419679	-0.59498	-0.37992	-0.0375651	0.323316	0.36976	0.46538
FBgn0030629	FBgn0031307	CG9123	MFS3	-0.134525	-0.124322	0.119367	-0.380067	0.51114	-0.171733	-0.303594	-0.0461026	0.256809	-0.000768377	-0.200546	-0.080082
FBgn0030629	FBgn0259748	CG9123	CG42397	-0.138421	-0.588669	-0.17742	-0.48668	0.265119	-0.556871	-0.0722274	-0.148809	0.00384189	-0.444207	-0.326133	-0.466661
FBgn0030629	FBgn0040554	CG9123	CR17025	0.12901	-0.443873	-0.674325	0.0216771	-0.294289	0.29402	0.135917	-0.536071	-0.444634	-0.301118	0.125587	0.603091
FBgn0030629	FBgn0034494	CG9123	CG10444	-0.0169555	-0.555118	0.0390757	-0.573078	-0.49106	0.00632899	0.110817	0.233757	-0.284982	-0.32528	-0.524545	0.0767523
FBgn0030629	FBgn0015568	CG9123	alpha-Est1	-0.150039	0.114689	-0.358425	-0.422579	0.107498	0.423929	0.112695	-0.428584	-0.0790575	-0.00110988	-0.321865	0.490822
FBgn0030629	FBgn0260720	CG9123	CR42547	0.22238	-0.197879	-0.0301507	0.562247	0.475238	-0.543163	0.143687	-0.241356	0.288995	-0.113976	0.492103	-0.634167
FBgn0030629	FBgn0035666	CG9123	Jon65Aii	-0.0115364	0.132765	0.0821539	-0.398638	0.548327	-0.46139	-0.0329548	0.0276616	0.383335	0.095791	-0.247247	-0.593272
FBgn0030629	FBgn0031735	CG9123	CG11029	-0.730709	0.0994047	-0.560692	-0.434466	0.215311	-0.168844	-0.705285	-0.452489	-0.0110988	0.0189533	-0.265346	-0.240844
FBgn0030629	FBgn0036483	CG9123	CG12316	0.541319	0.384511	0.490356	0.450861	0.0294886	0.291746	0.480236	0.491249	0.119696	0.390421	0.358064	0.354563
FBgn0030629	FBgn0032147	CG9123	IP3K1	0.494313	0.23011	-0.0751882	0.411399	0.354918	-0.400367	0.440622	-0.180142	0.314608	0.363955	0.466832	-0.672245
FBgn0030629	FBgn0035667	CG9123	Jon65Ai	-0.240118	-0.261475	-0.227697	-0.425611	0.284409	-0.602473	-0.241527	-0.331427	-0.00145138	-0.148724	-0.203535	-0.516093
FBgn0030629	FBgn0029603	CG9123	CG14053	0.307216	0.640544	0.293004	0.209973	-0.226659	-0.130697	0.633313	0.39597	-0.303765	0.631094	0.269273	0.215231
FBgn0030629	FBgn0002869	CG9123	MtnB	0.583952	-0.275582	0.175721	0.500745	0.113967	0.374468	0.471954	0.202937	0.060531	-0.18441	0.299667	0.183557
FBgn0030629	FBgn0033451	CG9123	CG1665	-0.152174	0.198114	-0.39303	-0.260106	-0.275305	0.000200753	-0.0879365	-0.240929	-0.346538	0.0572868	-0.402544	0.138052
FBgn0030629	FBgn0033205	CG9123	CG2064	-0.665982	0.0281284	-0.622416	-0.21944	-0.530382	-0.295325	-0.679075	-0.586528	-0.478614	0.271408	-0.0680441	-0.114488
FBgn0030629	FBgn0051097	CG9123	CG31097	-0.273883	0.279022	-0.209389	-0.237687	0.212825	-0.889089	-0.345684	-0.26176	0.138991	0.212157	-0.108853	-0.544267
FBgn0030629	FBgn0038674	CG9123	CG14285	-0.678035	0.525538	-0.646649	0.455597	0.137928	-0.811032	-0.41407	-0.53351	0.118501	0.477162	0.368992	-0.512849
FBgn0030629	FBgn0264721	CG9123	CR43989	0.568981	-0.39434	0.480626	0.156428	-0.0978774	0.791542	0.528217	0.303338	-0.388543	-0.192863	-0.0372236	0.67583
FBgn0030629	FBgn0051664	CG9123	CG31664	-0.112956	-0.415516	0.228678	-0.547095	-0.139581	0.423445	-0.0263809	0.228976	-0.182447	-0.202254	-0.408691	0.642022
FBgn0028543	FBgn0259716	NimB2	CG42370	0.893605	0.926587	0.282921	0.738752	0.599786	0.520518	0.785537	0.238197	0.574148	0.636302	0.589601	0.431743
FBgn0028543	FBgn0052523	NimB2	CG32523	0.163967	-0.211129	-0.215067	0.474593	0.21879	-0.516528	0.225817	0.135917	0.371297	-0.322462	0.26859	0.0831555
FBgn0028543	FBgn0035496	NimB2	CG14990	0.272553	-0.534421	-0.119621	0.529211	0.610974	-0.180529	0.347563	0.0981815	0.474857	-0.301118	0.333561	0.0241612
FBgn0028543	FBgn0052553	NimB2	CR32553	0.118913	-0.0749152	-0.0304728	0.137272	0.535511	-0.0601733	-0.0293691	-0.0544694	0.576197	-0.216938	0.0242466	0.0411509
FBgn0028543	FBgn0085732	NimB2	CR40190	0.266568	0.133329	0.143484	-0.00757737	0.270822	0.0815853	0.088961	0.0461026	0.17186	0.0596773	-0.174507	-0.060531
FBgn0028543	FBgn0004426	NimB2	LysC	0.615527	0.274721	0.483902	0.00256754	0.22879	0.10783	0.573881	0.438316	0.231708	0.37603	0.0799966	0.0644583
FBgn0028543	FBgn0053282	NimB2	CG33282	0.0663614	-0.543271	0.235253	-0.00379878	0.632296	0.343485	-0.0263809	0.120977	0.613079	-0.221293	0.0851191	0.360369
FBgn0028543	FBgn0262887	NimB2	CR43242	-0.370619	-0.315416	-0.266303	-0.187548	0.380951	-0.0779183	-0.416887	-0.244259	0.204047	-0.365577	0.0200632	-0.00478101
FBgn0028543	FBgn0261429	NimB2	CR42646	0.317729	0.209256	0.749848	0.188529	0.162231	0.0437643	0.258175	0.510885	0.20695	0.369077	0.118672	0.0531034
FBgn0028543	FBgn0030628	NimB2	CG9114	0.233544	0.875222	0.570081	0.657242	-0.409526	0.476926	-0.117903	0.289081	-0.355332	0.682404	0.418595	0.554
FBgn0028543	FBgn0035767	NimB2	Cln7	0.967156	0.969174	0.733246	0.85709	0.891734	0.818096	0.85896	0.658243	0.777256	0.854179	0.74635	0.854094
FBgn0028543	FBgn0030773	NimB2	CG9676	0.0516669	-0.362304	-0.265535	0.378983	0.512984	-0.516648	0.0697516	0.10134	0.367626	-0.434048	0.203364	0.010928
FBgn0028543	FBgn0004872	NimB2	piwi	-0.445813	-0.0948525	-0.367951	0.103331	-0.604008	-0.116931	-0.546401	-0.235379	-0.484163	-0.47221	-0.0250149	-0.154529
FBgn0028543	FBgn0031726	NimB2	Cyp6a16	0.88962	0.830201	0.328876	0.375329	0.56444	0.24144	0.778793	0.194656	0.413814	0.625203	0.378724	0.333988
FBgn0028543	FBgn0039612	NimB2	CG14523	0.9213	0.873689	0.6874	0.702988	0.747457	0.612774	0.849313	0.362845	0.637411	0.628874	0.569453	0.538547
FBgn0028543	FBgn0039525	NimB2	CG5646	0.937846	0.968649	0.592632	0.805665	0.863054	0.753242	0.83736	0.621702	0.669598	0.738496	0.662085	0.692308
FBgn0028543	FBgn0263763	NimB2	CG43680	0.446067	0.305927	0.266594	-0.295341	0.293955	0.181739	0.557842	0.239648	0.229489	0.530863	-0.0230513	0.109366
FBgn0028543	FBgn0037225	NimB2	TwdlG	0.16053	-0.149355	0.137911	0.298709	0.139553	0.268133	0.323572	0.179373	0.199522	-0.0897294	0.148809	0.0995475
FBgn0028543	FBgn0039886	NimB2	CG2003	0.0188685	0.0700475	0.456732	-0.170027	0.0245264	-0.408116	-0.0108427	0.264578	0.258772	0.00409801	0.0344062	-0.125843
FBgn0028543	FBgn0036787	NimB2	CG4306	0.222371	-0.101412	0.0367386	0.24954	0.151019	-0.484599	0.120464	0.0201486	0.240758	-0.170238	0.108939	-0.0699223
FBgn0028543	FBgn0030993	NimB2	Mec2	0.969829	0.979957	0.780664	0.88372	0.784016	0.832637	0.837275	0.742338	0.654999	0.873389	0.729702	0.733032
FBgn0028543	FBgn0037230	NimB2	CG9780	0.936421	0.935723	0.791404	0.789063	0.826707	0.706006	0.740289	0.5972	0.763852	0.795099	0.654657	0.656279
FBgn0028543	FBgn0050428	NimB2	CG30428	0.0339459	-0.0655989	0.382038	-0.135525	0.365302	-0.350819	0.175702	0.436694	0.130283	0.00725689	-0.048237	-0.286227
FBgn0028543	FBgn0267408	NimB2	AOX1	0.900867	0.918772	0.614283	0.750596	0.699904	0.673517	0.616494	0.401093	0.488346	0.751814	0.475796	0.615385
FBgn0028543	FBgn0261509	NimB2	haf	0.659065	0.701139	-0.0803767	0.0617827	0.553313	0.377604	0.669598	-0.0863997	0.27636	0.416119	-0.0367113	0.0423461
FBgn0028543	FBgn0262007	NimB2	CG42825	0.792026	0.890661	0.593527	0.695402	0.649396	0.729265	0.629386	0.451891	0.551951	0.730556	0.403313	0.527192
FBgn0028543	FBgn0030600	NimB2	hiw	0.806824	0.26544	-0.0219199	0.497715	0.71648	0.356598	0.502177	0.0894732	0.547682	0.0409801	0.287885	0.236404
FBgn0028543	FBgn0037000	NimB2	ZnT77C	0.0112441	-0.0422613	0.501632	0.0402397	0.131411	0.414208	0.266285	0.401434	0.236489	0.0827286	0.17186	0.293691
FBgn0028543	FBgn0040342	NimB2	CG3706	-0.0215211	-0.398594	0.361725	0.241035	0.31838	0.043504	-0.0310766	0.223342	0.338257	-0.348246	0.223854	0.0356015
FBgn0028543	FBgn0030367	NimB2	Cyp311a1	0.814391	0.882578	0.542046	0.818109	0.750913	0.734017	0.632033	0.516435	0.553402	0.64723	0.591906	0.675403
FBgn0028543	FBgn0027934	NimB2	alpha-Est4aPsi	-0.047992	-0.530068	0.238287	0.440752	0.594273	0.172479	0.0969009	0.219329	0.38675	-0.272091	0.226244	0.0802527
FBgn0028543	FBgn0035243	NimB2	CG13926	0.536094	0.301147	0.156447	0.278367	-0.140386	-0.0534063	0.593016	0.0733373	-0.262358	0.572099	0.242978	-0.0636045
FBgn0028543	FBgn0034817	NimB2	Art7	0.731799	0.972075	0.537241	0.911039	0.392675	0.761521	0.559378	0.356356	0.350295	0.789038	0.770341	0.669256
FBgn0028543	FBgn0014073	NimB2	Tie	0.1235	0.206897	-0.0576324	0.0153001	0.684476	0.0879701	-0.15009	0.0180995	0.435158	-0.0490054	0.0717152	0.0284299
FBgn0028543	FBgn0038173	NimB2	Adgf-C	0.774942	0.843153	0.553158	0.714334	0.842347	0.695037	0.524972	0.41868	0.648083	0.555707	0.399044	0.356442
FBgn0028543	FBgn0037975	NimB2	CG3397	0.207989	0.476447	0.705431	0.594975	0.111828	-0.340485	0.204815	0.446171	0.315547	0.532998	0.447793	0.181764
FBgn0028543	FBgn0032399	NimB2	CG6785	-0.110953	0.135421	-0.188407	-0.3566	0.200201	0.131529	-0.0963886	0.0375651	0.173397	-0.00256126	-0.189533	0.0456757
FBgn0028543	FBgn0036550	NimB2	CG17026	0.205744	-0.62085	0.626671	0.221896	0.502821	-0.441993	0.186033	0.357722	0.370272	-0.476394	0.101853	-0.10356
FBgn0028543	FBgn0035670	NimB2	CG10472	0.623217	0.247207	0.400874	0.320537	0.723578	0.547535	0.643132	0.299752	0.519167	0.247503	0.235123	0.276103
FBgn0028543	FBgn0039777	NimB2	Jon99Fii	0.131579	-0.297909	0.0181337	0.11468	0.54678	0.235488	-0.00341501	0.0689832	0.262443	-0.463673	0.0387604	0.0582259
FBgn0028543	FBgn0002962	NimB2	nos	-0.424751	-0.000707024	0.115012	-0.124967	-0.56168	-0.114972	-0.593614	0.0750448	-0.46538	-0.37309	-0.156749	-0.233245
FBgn0028543	FBgn0037408	NimB2	NPFR	0.383163	-0.159037	-0.0318795	0.589856	0.53058	0.295185	0.482114	0.0992914	0.298557	-0.0186972	0.261163	0.147699
FBgn0028543	FBgn0039494	NimB2	grass	0.862111	0.856843	0.676751	0.662765	0.717545	0.607726	0.812004	0.634936	0.637241	0.688551	0.519594	0.502775
FBgn0028543	FBgn0015036	NimB2	Cyp4ae1	0.883487	0.571923	0.549607	0.308141	0.854379	0.685914	0.581064	0.41074	0.664988	0.447366	0.191753	0.518996
FBgn0028543	FBgn0267828	NimB2	Fatp	0.804169	0.778644	0.63149	0.564331	0.741993	0.585837	0.694442	0.458123	0.635448	0.306326	0.375822	0.460172
FBgn0028543	FBgn0038034	NimB2	Cyp9f3	0.0731492	-0.292575	0.326527	0.0147965	0.289912	-0.320298	0.0154529	0.308034	0.340306	-0.270639	0.0248442	0.0431145
FBgn0028543	FBgn0022702	NimB2	Cht2	-0.0284094	0.406625	0.670793	0.730959	-0.525161	0.278578	-0.0158798	0.346623	-0.218219	0.463929	0.618714	0.409716
FBgn0028543	FBgn0032470	NimB2	CG5142	0.127433	-0.296052	0.567151	0.0709733	0.502231	-0.126447	0.139247	0.402288	0.415436	-0.204901	0.00332963	-0.0347477
FBgn0028543	FBgn0069973	NimB2	CG40485	0.170864	-0.274688	0.145901	-0.212748	0.564947	0.0377377	0.405105	0.173568	0.488261	-0.114915	-0.1582	0.0899001
FBgn0028543	FBgn0031141	NimB2	CG1304	0.361819	0.271143	0.411248	0.0892759	0.3266	0.156222	0.407923	0.393406	0.246991	0.442756	0.0967714	0.0454196
FBgn0028543	FBgn0013771	NimB2	Cyp6a9	0.136286	0.0908878	0.0345113	0.294588	0.0053244	-0.0351762	-0.018441	0.0478101	0.186374	-0.0209169	0.108683	0.0901562
FBgn0028543	FBgn0031935	NimB2	CG13793	0.286673	0.0146012	-0.142122	0.0358979	0.0731266	-0.293538	0.216597	-0.224537	0.182532	0.113037	0.0433706	-0.0187825
FBgn0028543	FBgn0029906	NimB2	xit	0.281393	0.917207	0.288299	0.770656	0.880051	0.685248	0.216341	0.202425	0.558012	0.65756	0.519594	0.511654
FBgn0028543	FBgn0035227	NimB2	Iml1	0.870072	0.861569	0.266014	0.628228	0.486748	0.446081	0.721421	0.221293	0.358064	0.775378	0.419278	0.448988
FBgn0028543	FBgn0040725	NimB2	CG13946	-0.308028	-0.0696211	0.209129	0.10354	0.157407	0.15691	-0.622287	0.0431673	0.261475	-0.422266	0.0714591	0.176556
FBgn0028543	FBgn0260874	NimB2	Ir76a	0.574319	0.294569	0.339779	0.143768	-0.0516399	0.345532	0.525997	0.0853752	-0.168445	0.27542	0.0507129	0.21156
FBgn0028543	FBgn0031307	NimB2	MFS3	0.823626	0.528057	0.25952	0.51243	0.682606	0.580859	0.615128	0.255272	0.439256	0.415094	0.297362	0.339537
FBgn0028543	FBgn0259748	NimB2	CG42397	0.454987	-0.143184	0.326433	0.382892	0.737394	0.632214	0.351746	0.25032	0.43695	-0.200717	0.228806	0.364296
FBgn0028543	FBgn0040554	NimB2	CR17025	-0.17203	-0.29922	0.340834	0.069746	-0.0350312	-0.246973	-0.159054	0.0676172	0.0648852	-0.337147	0.0953641	-0.160079
FBgn0028543	FBgn0034494	NimB2	CG10444	-0.239115	-0.0704313	0.0420144	0.0533065	-0.332042	-0.0925177	-0.262187	-0.0431999	-0.338684	-0.056433	0.151285	-0.116708
FBgn0028543	FBgn0015568	NimB2	alpha-Est1	0.330756	0.772218	0.257612	0.697114	0.316424	0.388405	0.233416	0.263895	0.318962	0.483309	0.494749	0.446598
FBgn0028543	FBgn0260720	NimB2	CR42547	0.0693652	-0.266655	0.0240378	-0.222115	0.498352	0.236756	0.0179288	0.0192094	0.258943	-0.447537	-0.147016	0.0321865
FBgn0028543	FBgn0035666	NimB2	Jon65Aii	0.0915311	-0.364714	0.0822999	-0.0197745	0.497017	0.373046	0.0783745	-0.0389311	0.311705	-0.290873	0.0491761	0.161359
FBgn0028543	FBgn0031735	NimB2	CG11029	0.87897	0.966257	0.465163	0.762999	0.743267	0.801339	0.764279	0.498762	0.509946	0.750875	0.54145	0.73141
FBgn0028543	FBgn0036483	NimB2	CG12316	-0.0688646	0.536919	-0.357104	-0.163079	-0.535118	-0.0339782	-0.478614	-0.283958	-0.450354	0.198924	-0.164945	-0.115769
FBgn0028543	FBgn0032147	NimB2	IP3K1	-0.0894533	0.260664	0.175595	-0.0622624	0.284397	0.202374	-0.391189	0.147016	0.224622	0.246393	-0.0246734	0.233672
FBgn0028543	FBgn0035667	NimB2	Jon65Ai	0.416327	-0.269007	0.22751	0.338597	0.737568	0.62444	0.355502	0.112781	0.424229	-0.095791	0.129941	0.36626
FBgn0028543	FBgn0029603	NimB2	CG14053	-0.202472	0.126323	-0.173569	-0.0966185	0.0270354	-0.377488	-0.467685	-0.284726	0.0951934	0.112781	-0.113037	-0.125245
FBgn0028543	FBgn0002869	NimB2	MtnB	-0.141905	-0.16213	-0.29837	-0.240362	-0.0216532	-0.188642	-0.287117	-0.0554939	0.0692393	-0.246137	-0.128746	-0.220097
FBgn0028543	FBgn0033451	NimB2	CG1665	0.162161	0.245176	0.455277	0.00210667	0.188633	-0.132747	0.168616	0.282336	0.183813	0.117989	0.0371382	-0.040724
FBgn0028543	FBgn0033205	NimB2	CG2064	0.685716	0.686889	0.774834	0.240785	0.460323	0.573224	0.72586	0.692222	0.345855	0.694101	0.298643	0.457611
FBgn0028543	FBgn0051097	NimB2	CG31097	0.364271	-0.0588782	0.203288	-0.546572	0.506035	0.0325073	0.410655	0.0931444	0.347306	0.00700077	-0.348075	-0.0142577
FBgn0028543	FBgn0038674	NimB2	CG14285	0.395532	0.25294	0.569164	-0.126162	0.540776	0.113752	0.491676	0.514642	0.543926	0.340903	0.116793	0.122428
FBgn0028543	FBgn0264721	NimB2	CR43989	-0.177516	-0.177502	-0.203984	-0.355095	-0.324213	-0.360189	-0.497652	-0.156322	-0.23999	-0.349355	-0.286007	-0.114915
FBgn0028543	FBgn0051664	NimB2	CG31664	0.0967922	0.0144879	0.0387173	0.457643	0.288301	-0.246349	-0.0559208	0.109707	0.310937	0.107914	0.30496	0.156237
FBgn0259716	FBgn0052523	CG42370	CG32523	0.0852165	-0.0665484	0.172341	0.724145	0.276452	-0.247789	0.0421754	0.277726	0.296764	-0.127977	0.517971	-0.0782891
FBgn0259716	FBgn0035496	CG42370	CG14990	0.2245	-0.34615	0.664711	0.72151	0.628512	0.524342	0.16725	0.406215	0.617604	-0.206267	0.542389	0.557159
FBgn0259716	FBgn0052553	CG42370	CR32553	-0.0270386	-0.154125	0.0670409	0.0980349	0.181096	-0.0133005	-0.419961	-0.12516	0.295398	-0.361393	0.0426876	-0.376505
FBgn0259716	FBgn0085732	CG42370	CR40190	0.612644	-0.0150299	0.834227	0.54538	0.0539635	-0.117759	0.450354	0.392982	0.0630923	-0.110561	0.283446	-0.219585
FBgn0259716	FBgn0004426	CG42370	LysC	0.54804	0.357408	0.459417	0.204567	0.255689	0.0543586	0.573283	0.340476	0.340903	0.537338	0.229745	-0.0778622
FBgn0259716	FBgn0053282	CG42370	CG33282	0.0163744	-0.642824	0.688361	0.349144	0.532111	-0.0359504	-0.139162	0.470588	0.529241	-0.3596	0.276018	0.0858021
FBgn0259716	FBgn0262887	CG42370	CR43242	-0.42651	-0.443488	0.379657	0.392286	0.650196	0.399199	-0.617946	0.244856	0.412448	-0.571416	0.221719	0.314181
FBgn0259716	FBgn0261429	CG42370	CR42646	0.485314	0.00706745	0.158847	-0.30867	0.00622673	-0.122964	0.300777	0.0678733	-0.036626	0.158115	-0.20362	-0.248357
FBgn0259716	FBgn0030628	CG42370	CG9114	0.18658	0.827944	-0.235781	0.724109	-0.399867	0.621544	-0.0854606	-0.17058	-0.474003	0.441475	0.454025	0.545633
FBgn0259716	FBgn0035767	CG42370	Cln7	0.836724	0.832848	0.157555	0.652323	0.678393	0.527057	0.680355	0.254333	0.628874	0.559378	0.45044	0.425254
FBgn0259716	FBgn0030773	CG42370	CG9676	-0.00937344	-0.280994	-0.272959	0.397245	0.243038	-0.167725	-0.160847	-0.0380774	0.386067	-0.344404	0.293179	-0.139418
FBgn0259716	FBgn0004872	CG42370	piwi	-0.501603	0.0466197	-0.197461	-0.0664576	-0.303043	0.296099	-0.611884	-0.271579	-0.639717	-0.546572	-0.124562	-0.010928
FBgn0259716	FBgn0031726	CG42370	Cyp6a16	0.732652	0.774267	-0.015737	0.21626	0.563585	0.501524	0.493896	-0.0415777	0.391872	0.561086	0.200546	0.469991
FBgn0259716	FBgn0039612	CG42370	CG14523	0.85033	0.815613	-0.0662647	0.207564	0.573517	0.41813	0.741228	-0.0100743	0.504738	0.517801	0.311449	0.552378
FBgn0259716	FBgn0039525	CG42370	CG5646	0.732856	0.857766	0.112217	0.656826	0.627474	0.320808	0.616494	0.164603	0.59737	0.509519	0.312217	0.315547
FBgn0259716	FBgn0263763	CG42370	CG43680	0.438706	0.291615	0.559665	0.044858	0.785698	0.363338	0.642705	0.341074	0.380773	0.628874	0.0389311	0.402373
FBgn0259716	FBgn0037225	CG42370	TwdlG	0.224484	-0.0758601	0.413561	0.31268	0.697263	0.274626	0.291471	0.30479	0.451464	-0.0332963	0.0735081	0.263895
FBgn0259716	FBgn0039886	CG42370	CG2003	-0.174705	0.0267928	-0.334713	-0.303746	-0.220451	-0.213336	-0.318364	-0.186545	0.0162213	-0.142747	-0.176471	-0.105097
FBgn0259716	FBgn0036787	CG42370	CG4306	0.397361	-0.298036	-0.143315	-0.246266	-0.145862	-0.452478	0.115683	0.0737642	-0.0153675	-0.235806	-0.120464	-0.346965
FBgn0259716	FBgn0030993	CG42370	Mec2	0.908379	0.931651	0.343803	0.849187	0.825611	0.707353	0.816699	0.363955	0.692052	0.658926	0.682831	0.592846
FBgn0259716	FBgn0037230	CG42370	CG9780	0.941035	0.880153	0.848737	0.875636	0.853979	0.798961	0.83497	0.691027	0.725263	0.665414	0.753266	0.693844
FBgn0259716	FBgn0050428	CG42370	CG30428	0.395708	-0.189509	0.217667	-0.315639	0.00291568	-0.515492	0.468283	0.220268	0.00606164	0.0396141	-0.267822	-0.378092
FBgn0259716	FBgn0267408	CG42370	AOX1	0.879023	0.833085	0.682039	0.811429	0.832393	0.660277	0.70887	0.399556	0.610774	0.574148	0.602664	0.59959
FBgn0259716	FBgn0261509	CG42370	haf	0.792978	0.779446	0.791109	0.665526	0.640262	0.584611	0.832067	0.568428	0.544523	0.52113	0.458465	0.23777
FBgn0259716	FBgn0262007	CG42370	CG42825	0.848714	0.807903	0.615695	0.654174	0.738337	0.37005	0.723384	0.42551	0.469905	0.585759	0.438402	0.435414
FBgn0259716	FBgn0030600	CG42370	hiw	0.73006	0.143758	0.604597	0.633852	0.565888	0.041575	0.488773	0.390079	0.590967	-0.265858	0.34355	0.152822
FBgn0259716	FBgn0037000	CG42370	ZnT77C	-0.0424402	0.0311009	0.289227	0.126489	0.446549	0.438646	0.334927	0.200632	0.399129	0.238709	0.00572014	0.549731
FBgn0259716	FBgn0040342	CG42370	CG3706	-0.123459	-0.499571	-0.328021	-0.248823	0.530997	0.15835	-0.28336	-0.302399	0.383847	-0.33561	-0.10356	0.191241
FBgn0259716	FBgn0030367	CG42370	Cyp311a1	0.633047	0.804308	0.124604	0.706567	0.647318	0.666844	0.412789	0.197644	0.56544	0.516605	0.518996	0.610689
FBgn0259716	FBgn0027934	CG42370	alpha-Est4aPsi	-0.124194	-0.438234	0.535325	0.432084	0.807352	0.515877	-0.00230513	0.338598	0.61214	-0.149577	0.309229	0.424571
FBgn0259716	FBgn0035243	CG42370	CG13926	0.495154	0.412655	-0.109532	0.287087	0.188675	0.567163	0.595834	-0.0788013	-0.37087	0.674037	0.20029	0.221207
FBgn0259716	FBgn0034817	CG42370	Art7	0.443926	0.947157	-0.414416	0.656743	0.214038	0.477508	0.342269	-0.312473	0.224281	0.669598	0.407069	0.275335
FBgn0259716	FBgn0014073	CG42370	Tie	0.289954	0.169696	0.539494	0.637869	0.437407	0.543662	-0.0709468	0.206608	0.515154	-0.269017	0.351831	0.247161
FBgn0259716	FBgn0038173	CG42370	Adgf-C	0.52563	0.713782	0.328628	0.610353	0.346472	0.405574	0.351234	0.198924	0.426791	0.502433	0.416716	0.197131
FBgn0259716	FBgn0037975	CG42370	CG3397	0.14294	0.530877	-0.434587	0.25912	-0.195405	-0.346087	0.0258687	-0.160762	-0.105524	0.541023	0.296679	-0.116025
FBgn0259716	FBgn0032399	CG42370	CG6785	-0.00161481	-0.0194491	0.432265	0.0141851	0.0793617	-0.283535	-0.0316742	0.382054	0.172202	-0.194997	-0.109793	-0.249723
FBgn0259716	FBgn0036550	CG42370	CG17026	0.140738	-0.506466	0.0774344	-0.0911216	0.0504248	-0.578933	-0.0656535	0.129941	0.190472	-0.368138	-0.0893879	-0.36054
FBgn0259716	FBgn0035670	CG42370	CG10472	0.546022	0.362406	0.251438	0.383389	0.645398	0.202677	0.558098	0.296594	0.654743	0.317767	0.239648	0.230684
FBgn0259716	FBgn0039777	CG42370	Jon99Fii	0.0623449	-0.136185	0.0846773	0.0458221	0.508113	0.0521065	-0.240246	0.0688124	0.454367	-0.321694	-0.0666781	0.112268
FBgn0259716	FBgn0002962	CG42370	nos	-0.418065	0.0634971	-0.234096	-0.370462	-0.540574	0.255648	-0.519081	-0.231538	-0.670452	-0.411509	-0.307522	-0.119696
FBgn0259716	FBgn0037408	CG42370	NPFR	0.294549	0.0344593	0.0412234	0.49239	0.637076	0.621406	0.357893	0.152395	0.526338	0.189618	0.328353	0.448049
FBgn0259716	FBgn0039494	CG42370	grass	0.651307	0.718953	-0.0365349	0.407942	0.0872301	0.032961	0.585589	0.154529	0.368223	0.531546	0.239136	0.128148
FBgn0259716	FBgn0015036	CG42370	Cyp4ae1	0.777203	0.512999	0.360765	0.325604	0.670674	0.484663	0.492274	0.167677	0.473235	0.298386	0.261163	0.373943
FBgn0259716	FBgn0267828	CG42370	Fatp	0.584064	0.714394	-0.00840088	0.0622498	0.422378	-0.0476828	0.4209	0.0573722	0.356185	0.36737	0.108939	0.0818748
FBgn0259716	FBgn0038034	CG42370	Cyp9f3	-0.0881053	-0.387303	-0.382912	-0.175296	-0.113367	-0.343169	-0.23777	-0.274396	-0.0134893	-0.458294	-0.113634	-0.17297
FBgn0259716	FBgn0022702	CG42370	Cht2	-0.113915	0.46769	-0.579507	0.36817	-0.632996	0.41646	-0.0764108	-0.391531	-0.497481	0.378639	0.381713	0.191924
FBgn0259716	FBgn0032470	CG42370	CG5142	0.207351	-0.285851	0.373976	-0.0870054	0.128953	-0.376511	0.0428584	0.393068	0.224195	-0.260394	-0.129429	-0.293349
FBgn0259716	FBgn0069973	CG42370	CG40485	0.134375	-0.31542	0.251761	-0.0666641	0.268041	-0.688233	0.228037	0.307948	0.400751	-0.199437	-0.0275762	-0.47887
FBgn0259716	FBgn0031141	CG42370	CG1304	0.414521	0.267945	-0.439919	-0.192629	0.181554	-0.133122	0.484846	-0.301845	0.251174	0.485956	-0.288606	-0.175702
FBgn0259716	FBgn0013771	CG42370	Cyp6a9	-0.0419925	0.0593243	-0.126097	-0.0575874	-0.137677	0.0860849	-0.25032	-0.255016	-0.0326987	-0.217878	-0.164945	0.16836
FBgn0259716	FBgn0031935	CG42370	CG13793	0.26372	-0.0461747	-0.0853555	-0.0905913	0.0415159	0.0119373	0.0823017	-0.208913	0.12294	0.0510544	-0.122343	0.0525058
FBgn0259716	FBgn0029906	CG42370	xit	-0.0463072	0.805428	-0.205008	0.352877	0.254518	0.314776	-0.129941	-0.293264	0.240844	0.492615	0.231196	0.22761
FBgn0259716	FBgn0035227	CG42370	Iml1	0.846488	0.894203	0.893966	0.868228	0.79933	0.803724	0.756424	0.582857	0.549048	0.749936	0.731068	0.76667
FBgn0259716	FBgn0040725	CG42370	CG13946	-0.321373	-0.0844163	-0.184819	-0.120336	0.220833	0.133416	-0.662815	-0.288162	0.0761283	-0.503372	-0.129087	0.0607018
FBgn0259716	FBgn0260874	CG42370	Ir76a	0.622683	0.39242	-0.131677	-0.0141869	0.265355	0.535613	0.604883	0.0284299	0.136173	0.433962	-0.174592	0.445829
FBgn0259716	FBgn0031307	CG42370	MFS3	0.624494	0.510009	0.580779	0.415718	0.508551	0.656625	0.52002	0.460514	0.536754	0.309485	0.242978	0.469222
FBgn0259716	FBgn0259748	CG42370	CG42397	0.340576	-0.0907068	-0.0798225	0.113215	0.399304	0.0927499	0.176897	0.119525	0.392726	-0.316657	0.0993768	0.104329
FBgn0259716	FBgn0040554	CG42370	CR17025	-0.0279831	-0.123783	0.297813	-0.45499	-0.197865	-0.149253	-0.160079	0.173653	-0.133185	-0.263895	-0.128917	-0.126611
FBgn0259716	FBgn0034494	CG42370	CG10444	-0.384322	-0.190027	-0.351327	-0.338508	-0.339559	0.114105	-0.520277	-0.366601	-0.476223	-0.322804	-0.227098	-0.148809
FBgn0259716	FBgn0015568	CG42370	alpha-Est1	0.229864	0.710655	0.0399157	0.711187	0.351825	0.759485	-0.0655682	0.0945104	0.437975	0.395629	0.487663	0.637411
FBgn0259716	FBgn0260720	CG42370	CR42547	0.0507435	-0.400493	0.693523	0.179792	0.5422	0.0481439	-0.100999	0.532827	0.512081	-0.595407	0.195339	-0.0871681
FBgn0259716	FBgn0035666	CG42370	Jon65Aii	0.174653	-0.27412	-0.214866	-0.162968	0.409293	0.114443	0.107487	-0.0127209	0.45855	-0.213694	-0.0463587	0.157688
FBgn0259716	FBgn0031735	CG42370	CG11029	0.797893	0.904402	0.270065	0.649234	0.446093	0.472931	0.647571	0.295569	0.449927	0.54034	0.423632	0.452489
FBgn0259716	FBgn0036483	CG42370	CG12316	0.0792412	0.664242	0.6405	0.416433	-0.316296	0.500384	-0.220951	0.17169	-0.413387	0.248869	0.255699	0.305216
FBgn0259716	FBgn0032147	CG42370	IP3K1	0.0326419	0.213964	0.579721	0.323353	0.146118	0.0881441	-0.21617	0.41074	0.215572	0.266883	0.276189	0.0231367
FBgn0259716	FBgn0035667	CG42370	Jon65Ai	0.288299	-0.260425	-0.227074	0.239883	0.297313	0.157686	0.19346	-0.106292	0.298301	-0.0402117	0.0398702	0.219244
FBgn0259716	FBgn0029603	CG42370	CG14053	-0.36505	0.0203853	-0.0982222	-0.58083	-0.246527	-0.725416	-0.677452	-0.276274	-0.064629	0.0771792	-0.435414	-0.38675
FBgn0259716	FBgn0002869	CG42370	MtnB	-0.0862971	-0.319156	0.0682513	0.338704	-0.191281	-0.158715	-0.231452	0.106804	0.099206	-0.488432	0.248698	-0.236489
FBgn0259716	FBgn0033451	CG42370	CG1665	0.0542236	0.278387	-0.530476	-0.202668	-0.158341	0.185713	-0.0483224	-0.323145	-0.207889	0.060531	-0.165799	0.0142577
FBgn0259716	FBgn0033205	CG42370	CG2064	0.708036	0.675523	-0.139389	-0.234409	-0.509853	-0.228466	0.717237	-0.0446512	-0.262187	0.545889	-0.16836	-0.046188
FBgn0259716	FBgn0051097	CG42370	CG31097	0.474018	0.0627907	0.174144	-0.106211	0.188738	-0.319173	0.510373	0.203193	0.273542	0.275164	-0.103048	-0.225561
FBgn0259716	FBgn0038674	CG42370	CG14285	0.330309	0.147102	0.0476569	-0.0969203	0.184638	-0.400984	0.309997	0.194997	0.299838	0.254674	-0.102877	-0.40263
FBgn0259716	FBgn0264721	CG42370	CR43989	-0.117003	-0.186123	0.350529	0.32492	-0.0729431	0.110688	-0.410228	0.0769231	-0.183301	-0.467088	0.0599334	0.0765816
FBgn0259716	FBgn0051664	CG42370	CG31664	0.122656	-0.115462	0.103257	0.138426	-0.00363897	0.157002	0.00298813	0.0604457	0.0902416	-0.080765	0.12405	0.196875
FBgn0052523	FBgn0035496	CG32523	CG14990	0.88397	0.670458	0.32624	0.315027	0.691687	0.538851	0.796978	0.223427	0.572099	0.644327	0.26287	0.416973
FBgn0052523	FBgn0052553	CG32523	CR32553	0.449958	0.21616	-0.22157	0.0084854	0.501332	0.00769522	0.376249	-0.227013	0.315974	0.185264	0.00452489	0.127807
FBgn0052523	FBgn0085732	CG32523	CR40190	-0.465321	-0.278331	0.245862	0.587916	0.00129713	-0.394607	-0.326816	0.00904977	-0.055067	-0.256553	0.438658	-0.254504
FBgn0052523	FBgn0004426	CG32523	LysC	0.517849	0.0108904	0.32073	-0.0447131	-0.0276749	-0.168694	0.323796	0.302826	0.0017075	-0.0471799	0.0995475	-0.123453
FBgn0052523	FBgn0053282	CG32523	CG33282	0.719049	0.473342	0.517271	0.184654	0.516954	-0.373265	0.505592	0.379834	0.400751	0.426705	0.229745	-0.00990353
FBgn0052523	FBgn0262887	CG32523	CR43242	-0.013089	0.073753	0.421749	0.277799	0.679339	-0.138019	0.164006	0.140528	0.637582	0.148724	0.163835	0.228037
FBgn0052523	FBgn0261429	CG32523	CR42646	-0.0652346	-0.235225	-0.456346	-0.28914	-0.0123467	-0.236763	0.138222	-0.345343	-0.0700931	-0.085546	-0.0422607	-0.104585
FBgn0052523	FBgn0030628	CG32523	CG9114	-0.19617	-0.2875	0.042482	0.714294	-0.302537	-0.577348	-0.365064	-0.213609	-0.337232	-0.441817	0.537096	-0.238368
FBgn0052523	FBgn0035767	CG32523	Cln7	0.285693	-0.0813949	0.0183183	0.277576	0.396918	-0.743295	0.352429	0.091693	0.529241	-0.0998036	0.210621	-0.0994621
FBgn0052523	FBgn0030773	CG32523	CG9676	0.902763	0.735414	0.53137	0.640811	0.884486	0.799347	0.886878	0.418082	0.822761	0.69504	0.468368	0.731922
FBgn0052523	FBgn0004872	CG32523	piwi	0.152923	0.273773	-0.393767	0.27773	-0.291463	-0.0661496	-0.0686417	-0.490054	-0.482199	0.549304	0.0666781	0.214121
FBgn0052523	FBgn0031726	CG32523	Cyp6a16	0.218414	0.0686387	-0.250183	-0.119229	0.618809	0.0424261	0.210706	-0.155639	0.501409	-0.0242466	-0.0986938	0.145821
FBgn0052523	FBgn0039612	CG32523	CG14523	0.296565	0.0268214	-0.226275	-0.566531	0.666947	0.355639	0.296594	-0.13993	0.562708	0.0387604	-0.157859	0.282165
FBgn0052523	FBgn0039525	CG32523	CG5646	0.0147475	-0.149345	0.385926	0.604986	0.228752	-0.814631	0.248527	0.300265	0.412875	-0.134295	0.24793	-0.181849
FBgn0052523	FBgn0263763	CG32523	CG43680	0.364023	-0.172639	0.290016	0.103742	0.489183	-0.0771483	0.167848	0.195595	0.287373	-0.204815	0.0364552	-0.0124648
FBgn0052523	FBgn0037225	CG32523	TwdlG	0.81362	0.613941	0.37527	0.537915	0.0532194	-0.480082	0.679928	0.136942	-0.0567745	0.52668	0.32545	-0.219927
FBgn0052523	FBgn0039886	CG32523	CG2003	0.0600444	0.0433497	-0.0527815	-0.662421	0.479175	0.439291	0.202083	-0.109878	0.572356	0.128148	-0.36643	0.406642
FBgn0052523	FBgn0036787	CG32523	CG4306	0.183771	-0.150149	0.0670438	-0.344311	0.351346	0.542746	-0.0140869	0.0674464	0.461026	0.0243319	-0.187484	0.456501
FBgn0052523	FBgn0030993	CG32523	Mec2	0.104324	-0.17786	0.0376518	0.440416	0.0736363	-0.650171	0.152907	0.207206	0.175702	-0.229062	0.280884	-0.117989
FBgn0052523	FBgn0037230	CG32523	CG9780	-0.000996001	-0.311405	-0.037092	0.344624	0.138253	-0.35665	-0.0688978	0.203791	0.218134	-0.329121	0.260992	0.037309
FBgn0052523	FBgn0050428	CG32523	CG30428	-0.274377	-0.209005	0.198513	-0.282683	0.103149	0.209973	-0.211133	0.256553	0.136088	0.0295398	-0.201998	0.207637
FBgn0052523	FBgn0267408	CG32523	AOX1	-0.0941146	-0.267739	-0.29717	0.222028	-0.126268	-0.555456	-0.144626	-0.0278323	-0.0647998	-0.30257	0.100231	-0.204047
FBgn0052523	FBgn0261509	CG32523	haf	0.190972	-0.253477	0.656736	0.772922	0.0736926	-0.641444	0.159566	0.520447	0.0939981	-0.297447	0.55528	-0.395629
FBgn0052523	FBgn0262007	CG32523	CG42825	-0.152706	-0.341472	0.0955997	-0.0984687	0.319959	0.0856676	-0.124989	0.111842	0.207633	-0.395543	0.131649	0.06258
FBgn0052523	FBgn0030600	CG32523	hiw	-0.0296136	0.409682	0.0774834	0.210028	0.355266	-0.477858	0.189874	0.129514	0.414582	0.117476	0.150004	-0.280714
FBgn0052523	FBgn0037000	CG32523	ZnT77C	0.440117	0.324166	0.0831454	-0.142627	-0.0554857	-0.199779	0.32434	-0.0323572	-0.0913515	0.36976	-0.0223683	-0.305899
FBgn0052523	FBgn0040342	CG32523	CG3706	0.824032	0.344952	-0.310602	-0.531301	0.839505	0.314868	0.723555	-0.286519	0.69743	0.536156	-0.332878	0.25604
FBgn0052523	FBgn0030367	CG32523	Cyp311a1	0.423208	0.118466	0.0840552	0.0156019	0.564202	0.0183451	0.484163	0.136856	0.516264	0.100828	0.135747	0.167421
FBgn0052523	FBgn0027934	CG32523	alpha-Est4aPsi	0.763563	0.586191	0.0290409	-0.040554	0.581817	-0.0248848	0.675318	0.0795697	0.54939	0.422266	0.151712	0.197644
FBgn0052523	FBgn0035243	CG32523	CG13926	0.170085	-0.125513	0.248155	0.288074	0.19832	0.0234912	0.0483224	0.128575	-0.0124648	-0.20601	0.22744	0.365662
FBgn0052523	FBgn0034817	CG32523	Art7	0.483886	-0.0962391	-0.202138	0.509347	0.743747	-0.75896	0.471783	-0.233843	0.64723	-0.163494	0.330231	-0.23888
FBgn0052523	FBgn0014073	CG32523	Tie	-0.558974	0.0336964	0.13198	0.745967	0.343142	-0.525467	-0.427218	0.0182703	0.297789	-0.141552	0.490993	-0.196534
FBgn0052523	FBgn0038173	CG32523	Adgf-C	0.0632996	-0.0235891	0.338575	-0.0463394	0.342838	-0.779061	0.243746	0.223342	0.346026	-0.040041	0.114574	-0.266285
FBgn0052523	FBgn0037975	CG32523	CG3397	0.633273	-0.0999896	-0.175044	-0.287895	0.340744	0.635477	0.403739	-0.049603	0.489371	-0.101426	-0.0287715	0.527192
FBgn0052523	FBgn0032399	CG32523	CG6785	0.0775516	-0.332177	0.544334	0.384767	0.0247509	-0.352382	0.0746179	0.48587	0.012294	-0.162981	0.304875	-0.127209
FBgn0052523	FBgn0036550	CG32523	CG17026	0.566896	0.475675	-0.1702	-0.632255	0.648433	0.467622	0.490993	-0.0696662	0.600444	0.452574	-0.418509	0.465978
FBgn0052523	FBgn0035670	CG32523	CG10472	0.333353	0.124249	0.334542	-0.339237	0.536123	-0.521901	0.368565	0.214206	0.565269	0.0974131	-0.121404	-0.157603
FBgn0052523	FBgn0039777	CG32523	Jon99Fii	0.537551	0.544524	0.0404783	-0.420715	0.300854	-0.521083	0.552036	-0.0637753	0.270298	0.434475	-0.361223	-0.319816
FBgn0052523	FBgn0002962	CG32523	nos	-0.220418	0.215618	-0.300259	0.0853265	-0.483806	-0.0044767	-0.380688	-0.310254	-0.563989	0.378895	-0.0740203	0.299155
FBgn0052523	FBgn0037408	CG32523	NPFR	0.734815	0.47269	-0.380058	-0.0983587	0.306855	0.00480316	0.665756	-0.168872	0.308034	0.329121	0.0589089	0.144796
FBgn0052523	FBgn0039494	CG32523	grass	0.21564	-0.291531	0.0540173	-0.429532	0.412569	-0.0448627	0.234696	0.236489	0.395117	-0.228464	-0.0970716	0.124733
FBgn0052523	FBgn0015036	CG32523	Cyp4ae1	0.0922015	-0.227941	-0.3344	-0.517023	0.468893	-0.692164	0.267822	-0.128746	0.392897	-0.170665	-0.25826	-0.269359
FBgn0052523	FBgn0267828	CG32523	Fatp	0.583964	0.143125	-0.284397	-0.517761	0.767948	-0.58111	0.53812	-0.153846	0.635875	0.309741	-0.213438	-0.0832408
FBgn0052523	FBgn0038034	CG32523	Cyp9f3	0.26509	-0.0424804	-0.235182	-0.692518	0.609542	0.641618	0.22744	-0.272005	0.587467	0.120123	-0.401861	0.480065
FBgn0052523	FBgn0022702	CG32523	Cht2	0.5942	0.153936	-0.0683599	-0.445852	-0.212894	-0.282177	0.30496	-0.137369	-0.273798	0.0867412	0.0443951	0.153334
FBgn0052523	FBgn0032470	CG32523	CG5142	0.368838	0.246337	0.162737	-0.216034	0.341454	-0.112259	0.321352	0.19235	0.445573	0.116708	0.0367113	0.0500299
FBgn0052523	FBgn0069973	CG32523	CG40485	0.773374	0.180004	0.583158	0.172044	0.60358	-0.282792	0.680355	0.525058	0.649449	0.414924	0.225134	0.109707
FBgn0052523	FBgn0031141	CG32523	CG1304	0.0310422	-0.51885	-0.504233	-0.379235	0.129281	-0.346361	-0.00717152	-0.385207	0.0361991	-0.37326	-0.543389	-0.258175
FBgn0052523	FBgn0013771	CG32523	Cyp6a9	0.0815303	-0.1942	-0.299331	-0.207422	0.190765	0.507049	0.212499	-0.354649	0.354307	-0.0859729	-0.308461	0.369248
FBgn0052523	FBgn0031935	CG32523	CG13793	0.199938	-0.309325	-0.149944	-0.144733	0.587049	0.735164	0.122257	-0.328524	0.607872	-0.239563	-0.237514	0.51874
FBgn0052523	FBgn0029906	CG32523	xit	0.598002	-0.0427079	-0.202844	-0.258349	0.473278	-0.705063	0.427901	-0.312559	0.433621	-0.117903	-0.0743618	-0.167592
FBgn0052523	FBgn0035227	CG32523	Iml1	0.0202181	-0.105403	-0.117889	0.512945	0.0135597	-0.265063	0.0659097	-0.010928	-0.00981815	-0.191753	0.381542	-0.122172
FBgn0052523	FBgn0040725	CG32523	CG13946	-0.0949254	0.137379	0.0667362	-0.264885	-0.368082	0.297997	-0.178288	-0.0857413	-0.284317	0.010245	-0.226671	0.295996
FBgn0052523	FBgn0260874	CG32523	Ir76a	0.388243	-0.0236515	0.0507154	0.0546349	-0.0191899	-0.342526	0.309997	-0.00307351	-0.0199778	0.0239904	0.0484078	-0.0677026
FBgn0052523	FBgn0031307	CG32523	MFS3	-0.0720481	0.18176	0.498896	-0.285701	0.305049	-0.396861	0.138905	0.356698	0.294032	0.142064	-0.111585	0.0148553
FBgn0052523	FBgn0259748	CG32523	CG42397	0.481419	0.643689	-0.0410697	-0.600965	0.540345	-0.567668	0.405105	0.0851191	0.481772	0.400922	-0.270639	-0.0838385
FBgn0052523	FBgn0040554	CG32523	CR17025	0.516999	0.829035	-0.170023	-0.622231	0.318764	0.508589	0.458721	-0.127977	0.457099	0.56083	-0.180483	0.430462
FBgn0052523	FBgn0034494	CG32523	CG10444	0.47211	0.167803	-0.466228	-0.499431	0.0234804	-0.0136121	0.294459	-0.536071	-0.169982	0.352685	-0.452062	0.261077
FBgn0052523	FBgn0015568	CG32523	alpha-Est1	0.296945	-0.0215052	0.163081	-0.17093	0.408125	-0.0432829	0.316059	0.105609	0.436438	0.000939127	-0.0174165	0.248783
FBgn0052523	FBgn0260720	CG32523	CR42547	0.219615	-0.0212072	0.702349	0.598199	0.48659	-0.598611	0.322462	0.473149	0.444549	0.0603603	0.405703	-0.200973
FBgn0052523	FBgn0035666	CG32523	Jon65Aii	0.0663287	0.0753113	-0.0445752	-0.487257	0.224684	-0.556734	0.150858	-0.185862	0.234953	0.00589089	-0.370272	-0.215658
FBgn0052523	FBgn0031735	CG32523	CG11029	0.432783	-0.212518	0.251496	0.42784	0.415476	-0.706939	0.436267	0.279262	0.518057	-0.287458	0.246991	-0.134637
FBgn0052523	FBgn0036483	CG32523	CG12316	-0.655174	-0.230936	0.0818659	0.644817	-0.743985	-0.349922	-0.64501	0.033894	-0.656962	-0.321779	0.522752	-0.0863997
FBgn0052523	FBgn0032147	CG32523	IP3K1	-0.555625	0.172578	0.615713	0.397928	0.0296492	-0.486378	-0.462221	0.464356	-0.0104158	0.14898	0.475625	-0.283787
FBgn0052523	FBgn0035667	CG32523	Jon65Ai	0.579884	0.333682	-0.0460847	-0.46711	0.419032	-0.607865	0.533339	-0.104243	0.433962	0.209852	-0.389994	-0.235892
FBgn0052523	FBgn0029603	CG32523	CG14053	0.272507	-0.220413	-0.220716	-0.187172	0.452356	0.290067	0.312132	-0.242551	0.532656	0.0381627	-0.084863	0.356612
FBgn0052523	FBgn0002869	CG32523	MtnB	-0.327733	0.00914548	0.441942	0.594704	0.524512	0.465237	-0.291898	0.443951	0.291898	-0.0271493	0.315718	0.127038
FBgn0052523	FBgn0033451	CG32523	CG1665	0.107769	-0.200093	-0.17291	-0.427193	0.545104	0.34249	0.223512	-0.231367	0.425169	-0.0329548	-0.403227	0.292837
FBgn0052523	FBgn0033205	CG32523	CG2064	0.149538	-0.156993	-0.305274	-0.551329	-0.159431	-0.329982	0.0385042	-0.141552	0.0082814	-0.22522	-0.322035	-0.0656535
FBgn0052523	FBgn0051097	CG32523	CG31097	0.0766652	-0.359944	0.34759	-0.165572	0.375967	-0.171243	0.16153	0.19107	0.420473	-0.336635	-0.119611	-0.0260394
FBgn0052523	FBgn0038674	CG32523	CG14285	0.584126	-0.201248	0.261157	0.154996	0.6034	-0.321327	0.539742	0.307692	0.599163	-0.0566038	0.142833	0.018441
FBgn0052523	FBgn0264721	CG32523	CR43989	-0.577463	0.223541	0.412886	0.273542	0.00675089	0.521786	-0.421156	0.0507129	-0.0799966	0.137454	0.0576283	0.394519
FBgn0052523	FBgn0051664	CG32523	CG31664	-0.153292	-0.145433	-0.432432	-0.252324	0.586551	0.767435	-0.25143	-0.329121	0.520362	-0.160249	-0.193119	0.573807
FBgn0035496	FBgn0052553	CG14990	CR32553	0.373106	0.202437	0.0282374	0.472468	0.365997	0.0174835	0.288141	-0.0122087	0.179032	0.304363	0.36737	-0.160505
FBgn0035496	FBgn0085732	CG14990	CR40190	-0.323429	-0.376437	0.625825	0.269934	0.0325121	-0.406494	-0.198497	0.382737	0.0438829	-0.14215	0.178007	-0.363528
FBgn0035496	FBgn0004426	CG14990	LysC	0.62034	0.150112	0.41825	0.00868213	0.204118	-0.202116	0.500854	0.200205	0.222061	0.206695	0.0154529	-0.175275
FBgn0035496	FBgn0053282	CG14990	CG33282	0.625207	0.55203	0.607885	0.000825236	0.546573	-0.424946	0.507556	0.247161	0.426449	0.451293	0.00922052	-0.0943396
FBgn0035496	FBgn0262887	CG14990	CR43242	-0.0361373	0.10599	0.454792	0.435348	0.746314	0.304133	0.0418339	0.370016	0.555195	0.20695	0.355246	0.402032
FBgn0035496	FBgn0261429	CG14990	CR42646	0.100252	-0.602274	-0.0335333	-0.165765	-0.0196796	-0.35216	0.171604	0.139332	-0.0539571	-0.185264	-0.105097	-0.371809
FBgn0035496	FBgn0030628	CG14990	CG9114	-0.145411	-0.255818	-0.574448	0.236479	-0.466239	-0.111871	-0.261931	-0.460685	-0.444037	-0.380859	0.149492	0.00990353
FBgn0035496	FBgn0035767	CG14990	Cln7	0.406931	-0.372165	0.411322	0.179633	0.789201	-0.331419	0.441731	0.333732	0.622898	-0.128234	0.184069	-0.0163067
FBgn0035496	FBgn0030773	CG14990	CG9676	0.790301	0.444084	0.287531	0.42221	0.691199	0.322639	0.726714	0.233416	0.576795	0.427303	0.355759	0.15692
FBgn0035496	FBgn0004872	CG14990	piwi	0.0316946	0.549665	-0.485269	0.202263	-0.628796	0.0521917	-0.142662	-0.406984	-0.594297	0.517203	0.0408094	0.241356
FBgn0035496	FBgn0031726	CG14990	Cyp6a16	0.40952	-0.219015	-0.0688536	0.472559	0.740962	0.327039	0.293179	0.145223	0.579442	-0.204474	0.406557	0.401947
FBgn0035496	FBgn0039612	CG14990	CG14523	0.394086	-0.177199	0.100565	0.45714	0.832147	0.723263	0.382054	0.203791	0.6871	-0.0249296	0.433706	0.648339
FBgn0035496	FBgn0039525	CG14990	CG5646	0.104889	-0.56609	0.38423	0.0459842	0.645281	-0.47285	0.289849	0.275164	0.540425	-0.275933	0.0801673	-0.248869
FBgn0035496	FBgn0263763	CG14990	CG43680	0.445458	-0.0548827	0.436936	0.0978859	0.78729	0.336756	0.379749	0.284299	0.410143	0.0442244	0.0629215	0.316657
FBgn0035496	FBgn0037225	CG14990	TwdlG	0.81109	0.470394	0.592052	0.502013	0.365146	-0.0981622	0.647913	0.494408	0.2481	0.503031	0.208059	-0.0369675
FBgn0035496	FBgn0039886	CG14990	CG2003	0.134158	0.0340114	0.0423109	0.149262	0.284743	0.243633	0.254674	0.128404	0.384359	0.133527	0.104585	0.312388
FBgn0035496	FBgn0036787	CG14990	CG4306	0.368264	-0.20259	0.302829	-0.153884	0.198863	0.0903332	0.12294	0.174763	0.306924	-0.0943396	-0.0415777	0.0667634
FBgn0035496	FBgn0030993	CG14990	Mec2	0.223151	-0.406569	0.212693	0.605777	0.704235	-0.0778167	0.268505	0.342184	0.585076	-0.21395	0.374114	0.175788
FBgn0035496	FBgn0037230	CG14990	CG9780	0.153223	-0.57627	0.512994	0.385842	0.719496	0.21499	0.0421754	0.422437	0.597968	-0.390933	0.325194	0.38564
FBgn0035496	FBgn0050428	CG14990	CG30428	-0.135493	-0.186011	-0.0878335	-0.514634	-0.0268437	-0.143391	0.0278323	-0.0782891	-0.0265517	0.221036	-0.33672	0.0374805
FBgn0035496	FBgn0267408	CG14990	AOX1	0.0453838	-0.408269	0.381691	0.546446	0.625266	-0.0519243	0.00904977	0.306412	0.389396	-0.295057	0.441048	0.221805
FBgn0035496	FBgn0261509	CG14990	haf	0.286791	-0.452458	0.797649	0.185461	0.555401	-0.0522855	0.322462	0.409374	0.342099	-0.260394	0.187996	-0.0858875
FBgn0035496	FBgn0262007	CG14990	CG42825	0.0353346	-0.281143	-0.168399	0.538901	0.660701	0.384649	0.0554085	0.029796	0.47204	-0.275164	0.373346	0.346026
FBgn0035496	FBgn0030600	CG14990	hiw	0.139514	0.0971584	0.774897	0.588948	0.720921	-0.374082	0.164347	0.533595	0.572868	0.100401	0.375395	-0.13532
FBgn0035496	FBgn0037000	CG14990	ZnT77C	0.462244	0.563754	0.255898	0.464319	0.238111	0.131399	0.510458	0.192863	0.10467	0.614787	0.141979	0.177495
FBgn0035496	FBgn0040342	CG14990	CG3706	0.795961	0.640267	0.0826424	0.252772	0.87248	0.588338	0.744984	0.159993	0.67566	0.617092	0.372577	0.51763
FBgn0035496	FBgn0030367	CG14990	Cyp311a1	0.536164	-0.185467	0.443389	0.601462	0.870505	0.503743	0.544267	0.444293	0.77478	0.0327841	0.427388	0.455818
FBgn0035496	FBgn0027934	CG14990	alpha-Est4aPsi	0.696005	0.662054	0.558343	0.344651	0.847369	0.485433	0.666012	0.456416	0.657731	0.568087	0.221122	0.471357
FBgn0035496	FBgn0035243	CG14990	CG13926	0.28487	0.110231	-0.425877	0.142288	0.391832	0.457625	0.222146	-0.228806	-0.122855	0.0250149	0.0124648	0.494664
FBgn0035496	FBgn0034817	CG14990	Art7	0.578582	-0.326744	-0.0983772	0.172743	0.733307	-0.318529	0.563733	0.00751302	0.549902	-0.205669	0.156066	-0.194058
FBgn0035496	FBgn0014073	CG14990	Tie	-0.493601	-0.388506	0.795993	0.392782	0.518238	0.00930266	-0.528729	0.376932	0.400068	-0.413728	0.232562	0.00495176
FBgn0035496	FBgn0038173	CG14990	Adgf-C	0.128022	-0.392001	0.527691	0.389298	0.723753	-0.384275	0.160335	0.164091	0.520789	-0.294715	0.243234	-0.190472
FBgn0035496	FBgn0037975	CG14990	CG3397	0.719639	0.132145	-0.332854	0.0458682	0.238588	0.19766	0.523179	-0.0694101	0.304875	0.139503	0.171519	0.329378
FBgn0035496	FBgn0032399	CG14990	CG6785	0.0103062	-0.653915	0.402999	-0.186896	0.00812473	-0.476196	0.0953641	0.195082	-0.0147699	-0.147614	-0.12516	-0.421071
FBgn0035496	FBgn0036550	CG14990	CG17026	0.620003	0.509353	0.291721	0.0430261	0.596078	-0.0195574	0.506446	0.353795	0.517715	0.436609	0.0469564	0.123026
FBgn0035496	FBgn0035670	CG14990	CG10472	0.578629	0.239335	0.728131	0.419774	0.922883	-0.0616652	0.454282	0.492786	0.730897	0.206693	0.298216	0.079399
FBgn0035496	FBgn0039777	CG14990	Jon99Fii	0.398473	0.496142	0.602492	0.285278	0.748789	-0.3351	0.395629	0.387604	0.446256	0.41407	0.267907	-0.164091
FBgn0035496	FBgn0002962	CG14990	nos	-0.35956	0.324969	-0.854763	0.145766	-0.849164	0.0417509	-0.494835	-0.681294	-0.733117	0.288056	0.0271493	0.209682
FBgn0035496	FBgn0037408	CG14990	NPFR	0.850304	0.736778	0.439661	0.689908	0.807726	0.433892	0.735251	0.30479	0.518228	0.618885	0.451635	0.34133
FBgn0035496	FBgn0039494	CG14990	grass	0.382593	-0.257318	0.260275	0.404539	0.472523	0.198981	0.322974	0.347306	0.468625	-0.113634	0.372065	0.238282
FBgn0035496	FBgn0015036	CG14990	Cyp4ae1	0.208498	-0.0413946	0.434199	0.426009	0.866732	-0.193605	0.370528	0.362503	0.619824	0.0294545	0.382054	0.0915222
FBgn0035496	FBgn0267828	CG14990	Fatp	0.708816	-0.0827046	0.19683	-0.275953	0.79638	-0.496488	0.586442	0.272774	0.615555	0.277555	-0.0824725	-0.0446512
FBgn0035496	FBgn0038034	CG14990	Cyp9f3	0.267786	0.368266	-0.152088	0.285241	0.45997	0.332612	0.168189	-0.00384189	0.431401	0.26176	0.261931	0.312559
FBgn0035496	FBgn0022702	CG14990	Cht2	0.631237	0.410381	-0.59438	0.329311	-0.429469	-0.0148685	0.328609	-0.371041	-0.371894	0.256553	0.313754	0.295654
FBgn0035496	FBgn0032470	CG14990	CG5142	0.372365	-0.0270611	0.520367	-0.311955	0.358737	-0.426081	0.344489	0.475369	0.331341	0.00708614	-0.174592	-0.211901
FBgn0035496	FBgn0069973	CG14990	CG40485	0.783176	0.608656	0.40729	-0.5238	0.579126	-0.638473	0.679331	0.150943	0.468881	0.587894	-0.431657	-0.279348
FBgn0035496	FBgn0031141	CG14990	CG1304	0.194154	-0.184233	-0.307063	0.128638	0.23588	-0.395901	0.18202	0.0651691	0.21506	-0.0716298	0.0731978	-0.282507
FBgn0035496	FBgn0013771	CG14990	Cyp6a9	0.0174679	-0.0107863	0.239046	0.32214	0.137615	0.261142	0.0877657	0.107744	0.272688	-0.123367	0.374712	0.503714
FBgn0035496	FBgn0031935	CG14990	CG13793	0.29557	-0.407185	0.417144	0.339525	0.644126	0.398813	0.213609	0.193375	0.529839	-0.166567	0.390762	0.476138
FBgn0035496	FBgn0029906	CG14990	xit	0.555853	-0.300227	-0.222829	0.236939	0.51877	-0.322184	0.455221	-0.163664	0.258858	-0.134039	0.244856	-0.153334
FBgn0035496	FBgn0035227	CG14990	Iml1	0.186478	-0.269691	0.72268	0.81716	0.667834	0.265237	0.264578	0.344148	0.348929	-0.10928	0.564842	0.40041
FBgn0035496	FBgn0040725	CG14990	CG13946	-0.165393	0.00183429	-0.0708805	0.142985	-0.360938	0.244971	-0.375764	-0.268906	-0.248879	-0.0433706	0.14898	0.103731
FBgn0035496	FBgn0260874	CG14990	Ir76a	0.444177	0.009148	0.244315	-0.272002	0.207243	0.0875222	0.476565	0.208059	0.11611	0.137198	-0.203108	0.181678
FBgn0035496	FBgn0031307	CG14990	MFS3	0.0121977	-0.194942	0.77108	0.48189	0.703157	0.049637	0.0877657	0.490737	0.454623	-0.0601895	0.2411	0.25826
FBgn0035496	FBgn0259748	CG14990	CG42397	0.584991	0.681497	0.487089	0.355506	0.809644	-0.261038	0.385469	0.350209	0.594553	0.428754	0.230855	-0.116366
FBgn0035496	FBgn0040554	CG14990	CR17025	0.374286	0.737252	0.49793	-0.516074	0.191142	0.181503	0.399556	0.28669	0.294032	0.468112	-0.197302	0.287117
FBgn0035496	FBgn0034494	CG14990	CG10444	0.322752	0.650075	-0.458453	0.0598245	-0.20935	0.104821	0.279092	-0.178093	-0.331683	0.527363	0.107402	0.128319
FBgn0035496	FBgn0015568	CG14990	alpha-Est1	0.368199	-0.350772	0.49758	0.55291	0.629176	0.539104	0.302997	0.270213	0.50969	-0.0763255	0.433621	0.620166
FBgn0035496	FBgn0260720	CG14990	CR42547	0.238956	-0.165292	0.71925	-0.24806	0.596384	-0.38217	0.269786	0.339964	0.44139	-0.0570307	-0.349441	-0.402715
FBgn0035496	FBgn0035666	CG14990	Jon65Aii	0.177605	-0.179942	0.389703	0.316046	0.59924	-0.35328	0.143345	0.274311	0.306582	-0.126185	0.265944	-0.164689
FBgn0035496	FBgn0031735	CG14990	CG11029	0.536368	-0.492712	0.576206	0.304585	0.670561	-0.280274	0.480321	0.437804	0.555622	-0.436097	0.199949	-0.120208
FBgn0035496	FBgn0036483	CG14990	CG12316	-0.761995	-0.458847	0.435161	0.189149	-0.700088	0.0112283	-0.758644	-0.117818	-0.625459	-0.281482	0.0803381	0.160847
FBgn0035496	FBgn0032147	CG14990	IP3K1	-0.721598	0.186158	0.466739	-0.0234721	0.0324458	-0.248273	-0.692393	0.193802	-0.0357722	0.168616	-0.205413	-0.32528
FBgn0035496	FBgn0035667	CG14990	Jon65Ai	0.750648	0.630608	0.18217	0.27022	0.774972	-0.257829	0.56433	0.155383	0.494237	0.371468	0.194997	-0.135661
FBgn0035496	FBgn0029603	CG14990	CG14053	0.21873	-0.132801	0.328309	-0.383112	0.271339	-0.215431	0.135234	0.0873389	0.299752	0.0294545	-0.295142	-0.0216853
FBgn0035496	FBgn0002869	CG14990	MtnB	-0.40805	-0.0356421	0.25175	0.298752	0.466279	-0.172504	-0.420388	0.0645437	0.224537	-0.000768377	0.15026	-0.0840092
FBgn0035496	FBgn0033451	CG14990	CG1665	0.216176	-0.454991	-0.367169	0.0294045	0.112913	0.346941	0.19218	-0.185179	0.0570307	-0.223598	0.132332	0.394007
FBgn0035496	FBgn0033205	CG14990	CG2064	0.315439	-0.141891	-0.25055	-0.135185	-0.144182	-0.491564	0.195168	-0.107573	0.0132332	-0.0751302	-0.142491	-0.174336
FBgn0035496	FBgn0051097	CG14990	CG31097	0.241688	-0.465467	0.669642	-0.0179632	0.466572	-0.366498	0.236489	0.38803	0.387518	-0.334927	-0.0987791	-0.219244
FBgn0035496	FBgn0038674	CG14990	CG14285	0.730424	-0.065139	0.176289	-0.486428	0.481884	-0.477846	0.568684	0.178263	0.47204	0.0539571	-0.232221	-0.313498
FBgn0035496	FBgn0264721	CG14990	CR43989	-0.678154	-0.183895	0.118964	0.00312229	0.0765504	0.502122	-0.546743	-0.128404	-0.0486639	0.0133185	-0.0579698	0.381115
FBgn0035496	FBgn0051664	CG14990	CG31664	-0.0614868	0.0242662	-0.159264	0.602781	0.415513	0.55934	-0.166823	-0.0554085	0.40263	-0.0186118	0.505934	0.573295
FBgn0052553	FBgn0085732	CR32553	CR40190	-0.379081	-0.164736	-0.159711	-0.307259	0.131876	0.0535611	-0.612994	-0.313498	0.171775	-0.259455	-0.280714	0.238624
FBgn0052553	FBgn0004426	CR32553	LysC	0.28234	0.203557	-0.33901	-0.0282303	0.0202531	0.137561	-0.199436	-0.576624	0.0391872	-0.0640451	-0.0466149	0.203278
FBgn0052553	FBgn0053282	CR32553	CG33282	0.507871	0.178338	-0.288588	-0.302205	0.417328	0.216294	0.405874	-0.457611	0.4209	0.00922052	-0.330658	0.532741
FBgn0052553	FBgn0262887	CR32553	CR43242	0.275141	0.271804	0.388791	0.305114	0.197666	0.114026	0.44378	0.32084	0.0674464	0.257577	0.283531	0.114147
FBgn0052553	FBgn0261429	CR32553	CR42646	-0.0239026	0.0953603	0.0747491	-0.219259	0.086282	0.178694	-0.0331256	-0.0702638	0.211901	-0.0266371	-0.0899855	0.307522
FBgn0052553	FBgn0030628	CR32553	CG9114	-0.0813508	-0.0948583	-0.20733	-0.136162	0.146028	-0.233729	-0.125672	-0.0435414	-0.138222	-0.152224	-0.130368	-0.428071
FBgn0052553	FBgn0035767	CR32553	Cln7	0.157054	-0.124288	0.0671071	-0.0443585	0.369109	-0.127391	0.0333817	-0.0110988	0.436865	-0.2014	0.0734227	0.0160505
FBgn0052553	FBgn0030773	CR32553	CG9676	0.434467	0.0343541	0.0356601	0.339808	0.594649	-0.133926	0.433279	0.063263	0.323231	0.147785	0.289593	0.0707761
FBgn0052553	FBgn0004872	CR32553	piwi	0.242347	0.226066	0.479442	0.38134	-0.221167	0.0941339	0.217878	0.502775	-0.351148	0.292325	0.104585	0.0287715
FBgn0052553	FBgn0031726	CR32553	Cyp6a16	0.236206	-0.00197944	0.691138	0.647514	0.31949	0.0511751	0.047554	0.53812	0.226074	-0.162298	0.404764	-0.255955
FBgn0052553	FBgn0039612	CR32553	CG14523	0.208414	0.0999166	0.24191	0.465321	0.52916	0.0140881	0.00597627	0.105865	0.366174	-0.0215146	0.235294	-0.083497
FBgn0052553	FBgn0039525	CR32553	CG5646	0.0867346	-0.113172	-0.0178426	0.0749268	0.398015	-0.118292	0.106719	-0.010928	0.456843	-0.143345	0.0504568	0.122001
FBgn0052553	FBgn0263763	CR32553	CG43680	0.133051	0.274951	-0.348714	-0.205773	-0.323076	-0.210483	-0.286263	-0.248783	-0.049603	-0.0396141	-0.049603	-0.295142
FBgn0052553	FBgn0037225	CR32553	TwdlG	0.11109	-0.15617	-0.119859	0.104196	-0.339317	-0.0267266	0.0892171	-0.0486639	-0.0819602	0.0346623	0.0995475	0.00298813
FBgn0052553	FBgn0039886	CR32553	CG2003	0.447653	0.580303	0.236832	0.452981	0.262771	0.245506	0.498762	0.228549	0.270896	0.325194	0.32417	0.201571
FBgn0052553	FBgn0036787	CR32553	CG4306	0.187237	0.212564	0.153483	0.10556	0.338588	0.295427	0.00452489	0.169726	0.301118	0.189191	0.060531	0.475284
FBgn0052553	FBgn0030993	CR32553	Mec2	0.0361334	-0.132076	-0.00576272	-0.0462304	0.256317	-0.14551	-0.16264	0.0725689	0.236404	-0.305131	0.16392	-0.172799
FBgn0052553	FBgn0037230	CR32553	CG9780	0.0221735	-0.11889	-0.0164344	-0.0882809	0.1519	-0.0690617	-0.30479	-0.165116	0.305473	-0.282848	0.017075	-0.18774
FBgn0052553	FBgn0050428	CR32553	CG30428	-0.344068	0.0471483	-0.472442	-0.263755	0.502936	0.42355	-0.493896	-0.372577	0.30479	0.189021	-0.176727	0.485838
FBgn0052553	FBgn0267408	CR32553	AOX1	0.0537719	-0.065259	0.447123	0.0416685	0.0250988	-0.0828763	-0.222659	0.219073	0.0788867	-0.278238	0.0305643	-0.189362
FBgn0052553	FBgn0261509	CR32553	haf	-0.0347519	-0.185637	-0.184687	-0.1734	0.215863	-0.0294067	-0.345343	-0.460087	0.249979	-0.200461	-0.153419	-0.10006
FBgn0052553	FBgn0262007	CR32553	CG42825	-0.0215307	-0.116118	0.345651	0.073987	0.521184	-0.075052	-0.311278	0.132673	0.226586	-0.330573	0.0103304	-0.0650559
FBgn0052553	FBgn0030600	CR32553	hiw	0.0998719	0.135846	0.405228	0.182286	0.157423	0.10575	0.0183557	0.259541	0.267737	0.0513959	0.161615	0.318193
FBgn0052553	FBgn0037000	CR32553	ZnT77C	-0.0696083	0.110434	-0.142121	0.122485	-0.331104	-0.145986	-0.0890464	-0.138479	-0.012977	0.215572	-0.0295398	-0.264066
FBgn0052553	FBgn0040342	CR32553	CG3706	0.514096	0.390374	0.481154	0.492805	0.343839	0.256635	0.591736	0.458977	0.251345	0.406215	0.451293	0.0545548
FBgn0052553	FBgn0030367	CR32553	Cyp311a1	0.295995	0.0641404	0.00878992	0.173255	0.361125	-0.405563	0.303594	-0.106463	0.228293	-0.0676172	0.135064	-0.324597
FBgn0052553	FBgn0027934	CR32553	alpha-Est4aPsi	0.312841	0.309697	-0.223827	-0.245447	0.372964	0.00812123	0.250064	-0.368736	0.190045	0.187228	-0.0626654	-0.161786
FBgn0052553	FBgn0035243	CR32553	CG13926	-0.0487469	0.0599114	-0.521671	-0.272502	0.0575669	-0.176562	-0.335098	-0.178349	-0.367626	0.00853752	-0.214463	-0.210023
FBgn0052553	FBgn0034817	CR32553	Art7	0.203441	-0.0737595	0.0669079	0.0777993	0.46421	-0.1701	0.257748	0.0875096	0.263639	-0.15709	0.0438829	0.035943
FBgn0052553	FBgn0014073	CR32553	Tie	0.0410967	0.0293664	0.00304818	0.0730485	0.703618	-0.0805509	-0.0642875	-0.196363	0.399044	-0.235209	0.110219	-0.201059
FBgn0052553	FBgn0038173	CR32553	Adgf-C	0.248479	-0.0697351	-0.0284643	0.332806	0.540569	-0.0859051	0.229915	-0.125331	0.59737	-0.161786	0.341159	0.201571
FBgn0052553	FBgn0037975	CR32553	CG3397	0.535265	0.0366001	0.143596	-0.0957898	0.276039	0.262424	0.301204	0.0858875	0.31623	0.0452489	0.0428584	0.484078
FBgn0052553	FBgn0032399	CR32553	CG6785	-0.0582861	-0.0346888	-0.286718	-0.490932	0.0294955	0.0895677	0.109878	-0.419961	0.230086	0.0350892	-0.305046	0.393494
FBgn0052553	FBgn0036550	CR32553	CG17026	0.534941	0.462194	0.113923	0.319591	0.39425	0.313146	0.473406	-0.00691539	0.3561	0.286861	0.14676	0.57782
FBgn0052553	FBgn0035670	CR32553	CG10472	0.160349	0.23325	0.0654277	0.278639	0.256012	0.18099	-0.0542986	-0.0371382	0.313669	0.0265517	0.216682	0.176641
FBgn0052553	FBgn0039777	CR32553	Jon99Fii	0.559624	0.566759	0.278949	0.526636	0.215068	0.2379	0.50397	0.208316	0.151456	0.220183	0.33117	0.187569
FBgn0052553	FBgn0002962	CR32553	nos	-0.00298077	0.365932	0.247655	0.497239	-0.132993	0.170021	-0.0431145	0.288227	-0.261675	0.121318	0.232989	-0.135234
FBgn0052553	FBgn0037408	CR32553	NPFR	0.135804	0.0861107	0.174197	0.155011	0.137707	0.0662902	0.0394434	-0.0242466	-0.0344062	0.17297	0.126868	-0.0265517
FBgn0052553	FBgn0039494	CR32553	grass	0.27138	0.0924452	0.0107999	0.173905	0.599084	0.23155	0.137881	-0.0507983	0.566465	0.038675	0.206779	0.45616
FBgn0052553	FBgn0015036	CR32553	Cyp4ae1	0.167017	0.113775	0.508499	0.354407	0.359756	-0.0269786	0.143601	0.402886	0.273798	-0.0502006	0.186374	0.109536
FBgn0052553	FBgn0267828	CR32553	Fatp	0.303509	0.0671785	0.242073	0.00211685	0.484962	0.120936	0.295313	0.171604	0.374456	0.111842	-0.0286007	0.449671
FBgn0052553	FBgn0038034	CR32553	Cyp9f3	0.622143	0.470069	0.375757	0.369054	0.320296	0.140286	0.590028	0.390079	0.363955	0.271152	0.282848	0.338684
FBgn0052553	FBgn0022702	CR32553	Cht2	0.237739	0.0827113	-0.103315	0.0355811	-0.0647254	-0.133787	0.189362	0.032528	-0.0687271	0.0817041	0.10578	0.0298813
FBgn0052553	FBgn0032470	CR32553	CG5142	0.223419	0.0911329	-0.118361	0.0467954	0.238796	0.17308	0.0501153	-0.258602	0.489371	-0.0175873	0.14565	0.628191
FBgn0052553	FBgn0069973	CR32553	CG40485	0.301309	0.351491	-0.398027	-0.259732	0.430024	0.0222441	0.290873	-0.570392	0.459404	0.542047	-0.391958	0.575514
FBgn0052553	FBgn0031141	CR32553	CG1304	0.117995	-0.0702443	0.309682	0.357187	0.0343958	0.0960374	-0.16392	0.342159	0.174763	-0.146162	0.308592	0.385128
FBgn0052553	FBgn0013771	CR32553	Cyp6a9	0.440241	0.225215	0.5627	0.679338	0.0977259	0.107644	0.420302	0.6439	0.085546	0.101255	0.335354	-0.134039
FBgn0052553	FBgn0031935	CR32553	CG13793	0.410173	0.260781	0.546853	0.619326	0.179639	0.101109	0.189874	0.467856	0.131136	-0.159737	0.463844	-0.0132332
FBgn0052553	FBgn0029906	CR32553	xit	0.417793	-0.00350605	0.351671	0.296231	0.505103	0.114038	0.53479	0.621617	0.524204	-0.0582259	0.269017	0.317596
FBgn0052553	FBgn0035227	CR32553	Iml1	-0.0105295	-0.00702543	0.217906	0.117218	0.0302767	-0.162418	-0.257748	0.136173	0.113976	-0.104585	0.086912	-0.334244
FBgn0052553	FBgn0040725	CR32553	CG13946	0.312406	0.239761	0.530706	0.402779	0.359872	-0.193607	0.11143	0.347985	0.155758	0.0300521	0.319559	0.0380774
FBgn0052553	FBgn0260874	CR32553	Ir76a	-0.00272566	-0.275558	-0.447796	-0.49302	-0.13288	-0.143271	-0.3094	-0.234611	-0.203278	-0.127807	-0.247844	-0.45966
FBgn0052553	FBgn0031307	CR32553	MFS3	-0.0175106	0.24174	-0.0694992	0.423392	0.273341	0.0645532	0.0256126	-0.191667	0.354051	-0.0218561	-0.00708614	-0.0190387
FBgn0052553	FBgn0259748	CR32553	CG42397	0.401107	0.387319	0.272667	0.41389	0.469128	0.146089	0.227781	0.0750448	0.237087	0.133783	0.375992	0.437036
FBgn0052553	FBgn0040554	CR32553	CR17025	0.315005	0.132018	-0.320998	-0.137092	0.183145	0.22358	0.255016	-0.45172	0.0474686	0.0828993	-0.0656535	0.111756
FBgn0052553	FBgn0034494	CR32553	CG10444	0.499113	0.467259	0.427289	0.540208	-0.229568	-0.254768	0.572612	0.616751	-0.142064	0.496884	0.316913	0.0399556
FBgn0052553	FBgn0015568	CR32553	alpha-Est1	0.483045	0.0404831	0.0346514	0.304829	0.29293	0.0280128	0.46649	0.00759839	0.200205	-0.0410655	0.209767	-0.208742
FBgn0052553	FBgn0260720	CR32553	CR42547	0.459869	0.278309	-0.253858	-0.312242	0.284788	-0.0114523	0.350892	-0.427303	0.20695	0.167592	-0.2481	0.282677
FBgn0052553	FBgn0035666	CR32553	Jon65Aii	0.226029	0.406583	0.361609	0.654654	0.0791689	0.279017	-0.0391872	0.260821	0.170665	0.0561769	0.327499	0.183386
FBgn0052553	FBgn0031735	CR32553	CG11029	0.212239	-0.0545138	-0.17027	0.104242	0.444528	-0.0919497	0.0991206	-0.299411	0.37881	-0.305216	0.0942542	-0.0560061
FBgn0052553	FBgn0036483	CR32553	CG12316	-0.21777	-0.0818572	-0.00050458	-0.0874076	-0.269074	-0.222034	-0.360625	-0.0929736	-0.310083	-0.200717	-0.203876	-0.629813
FBgn0052553	FBgn0032147	CR32553	IP3K1	-0.0522962	-0.155929	-0.35505	-0.363301	0.399546	-0.0108348	-0.129173	-0.610006	0.249893	0.0563476	-0.437121	0.151541
FBgn0052553	FBgn0035667	CR32553	Jon65Ai	0.382118	0.562402	0.171755	0.304125	0.349945	0.398499	0.201998	0.0497738	0.277469	0.254504	0.266798	0.355502
FBgn0052553	FBgn0029603	CR32553	CG14053	0.509601	0.0488494	0.575817	-0.049928	0.310398	0.339453	0.510971	0.551524	0.084863	0.290873	-0.124904	0.620422
FBgn0052553	FBgn0002869	CR32553	MtnB	0.0311288	0.116182	-0.125663	-0.0424418	0.0702533	-0.598343	-0.0939127	-0.258772	0.12166	0.0391019	-0.129087	-0.215829
FBgn0052553	FBgn0033451	CR32553	CG1665	0.501078	0.283078	0.218491	0.588965	0.51736	0.263802	0.399727	0.398788	0.29241	0.0422607	0.388628	0.315632
FBgn0052553	FBgn0033205	CR32553	CG2064	0.127572	0.00797363	0.0975113	0.025805	0.202954	-0.046612	-0.0824725	-0.0239904	0.356442	-0.0127209	0.0151968	0.201912
FBgn0052553	FBgn0051097	CR32553	CG31097	-0.0109307	-0.24662	0.0304845	0.192235	0.206056	0.0395221	-0.204815	-0.12627	0.199607	-0.343977	0.135149	0.431572
FBgn0052553	FBgn0038674	CR32553	CG14285	0.295318	0.183563	-0.271724	-0.197042	0.445558	0.186383	0.303424	-0.294801	0.521216	0.262614	-0.0526765	0.756595
FBgn0052553	FBgn0264721	CR32553	CR43989	0.0512918	0.310155	0.133336	0.111435	-0.189673	-0.103835	-0.0455904	0.0767523	-0.234184	0.0881926	-0.154785	-0.228037
FBgn0052553	FBgn0051664	CR32553	CG31664	0.190207	0.0453116	0.590388	0.565628	0.641373	0.200298	-0.0813626	0.399983	0.233074	-0.139503	0.546572	-0.0197217
FBgn0085732	FBgn0004426	CR40190	LysC	0.0197637	-0.414576	0.50759	0.172761	0.482155	0.558237	0.128715	0.29241	0.745326	-0.163187	0.105012	0.706309
FBgn0085732	FBgn0053282	CR40190	CG33282	-0.511845	-0.0171282	0.55908	0.325032	0.47185	0.596194	-0.410057	0.151456	0.435841	0.00956203	0.250406	0.459916
FBgn0085732	FBgn0262887	CR40190	CR43242	-0.158043	0.390206	0.343637	0.42144	-0.209779	-0.364384	-0.294288	0.167079	-0.304619	0.315803	0.174251	-0.365747
FBgn0085732	FBgn0261429	CR40190	CR42646	0.615957	0.617973	0.162848	0.0107201	0.870259	0.872504	0.129002	0.195851	0.880133	-0.100999	0.0203193	0.847691
FBgn0085732	FBgn0030628	CR40190	CG9114	0.209718	-0.0759294	-0.274913	0.702688	-0.324815	0.24163	-0.0159652	-0.363186	-0.465978	0.0802527	0.388799	0.0118672
FBgn0085732	FBgn0035767	CR40190	Cln7	0.181725	0.123403	0.0965906	0.217758	0.358574	0.179914	0.012294	0.0966448	0.287544	0.0348331	-0.148553	-0.0662512
FBgn0085732	FBgn0030773	CR40190	CG9676	-0.50595	0.0497253	-0.113063	0.13384	0.195727	-0.0594008	-0.38675	-0.0920345	0.238709	-0.100657	0.0742764	0.0545548
FBgn0085732	FBgn0004872	CR40190	piwi	-0.375535	-0.557716	-0.283894	-0.0616067	-0.226133	0.165984	-0.349868	-0.273713	-0.341074	-0.224878	-0.0799966	-0.287715
FBgn0085732	FBgn0031726	CR40190	Cyp6a16	0.176324	-0.202506	-0.181104	-0.443308	-0.102113	-0.480674	0.00759839	-0.171263	-0.3129	-0.121233	-0.472381	-0.663365
FBgn0085732	FBgn0039612	CR40190	CG14523	0.284943	-0.139289	-0.151918	-0.606821	0.0376802	-0.406308	0.12294	-0.0432852	-0.050969	-0.128234	-0.398105	-0.343806
FBgn0085732	FBgn0039525	CR40190	CG5646	0.184363	0.152215	0.0922456	0.0816312	0.28818	0.312446	0.00691539	0.101597	0.246222	0.16614	-0.304363	0.0278323
FBgn0085732	FBgn0263763	CR40190	CG43680	0.268907	-0.204575	0.354355	0.442061	-0.0343797	-0.248068	0.344916	0.0549816	-0.141296	-0.0662512	0.406984	-0.0924614
FBgn0085732	FBgn0037225	CR40190	TwdlG	0.0136706	-0.0164716	0.335801	0.483706	0.0780491	0.418111	-0.0675318	0.21617	0.126014	-0.0607872	0.241697	0.405788
FBgn0085732	FBgn0039886	CR40190	CG2003	-0.179115	0.0231165	-0.487934	-0.360277	-0.15604	-0.440263	-0.291215	-0.270554	-0.376505	-0.11483	-0.381457	-0.613506
FBgn0085732	FBgn0036787	CR40190	CG4306	0.323899	-0.107199	-0.00491412	-0.441102	0.0807246	0.0966241	0.0825578	-0.0164774	-0.00298813	-0.191582	-0.251345	-0.0928029
FBgn0085732	FBgn0030993	CR40190	Mec2	0.281553	0.143341	0.194311	0.287347	0.258035	0.123987	0.155468	0.157517	0.228123	0.101426	-0.113037	-0.0262102
FBgn0085732	FBgn0037230	CR40190	CG9780	0.584764	0.23411	0.732199	0.19302	0.202379	-0.0101912	0.386067	0.331085	0.197046	0.190045	-0.0196363	-0.0797405
FBgn0085732	FBgn0050428	CR40190	CG30428	0.832376	0.452155	0.123655	-0.163184	0.49576	0.235112	0.641083	0.078716	0.448903	0.138905	-0.00691539	0.195812
FBgn0085732	FBgn0267408	CR40190	AOX1	0.39692	0.363921	0.566411	0.321382	0.030393	0.107149	0.354905	0.288056	-0.0869974	0.190216	0.0280884	0.0887902
FBgn0085732	FBgn0261509	CR40190	haf	0.594604	0.30112	0.815621	0.888199	0.280874	0.293015	0.466319	0.401861	0.39136	0.109024	0.612823	0.310083
FBgn0085732	FBgn0262007	CR40190	CG42825	0.574874	0.24343	0.334689	0.129759	-0.0401796	-0.268074	0.439426	0.183813	-0.302228	0.160079	0.12183	-0.240417
FBgn0085732	FBgn0030600	CR40190	hiw	0.380559	0.398964	0.489363	0.316208	0.410643	0.447525	0.180483	0.232221	0.388628	0.271322	-0.017075	0.486383
FBgn0085732	FBgn0037000	CR40190	ZnT77C	-0.0250457	-0.197775	0.068499	0.420545	-0.0327792	-0.285775	0.0857167	0.0341501	0.0288568	-0.230684	0.0741911	-0.0377358
FBgn0085732	FBgn0040342	CR40190	CG3706	-0.523922	-0.203022	-0.366748	-0.534449	-0.116298	-0.527844	-0.54384	-0.316998	-0.278494	-0.185008	-0.423632	-0.423376
FBgn0085732	FBgn0030367	CR40190	Cyp311a1	-0.0062448	-0.0600494	0.0366827	-0.304065	0.0697041	-0.105741	-0.170836	0.141552	0.00256126	-0.0379066	-0.186033	-0.167165
FBgn0085732	FBgn0027934	CR40190	alpha-Est4aPsi	-0.377262	-0.258447	0.450082	0.312614	0.102879	-0.387371	-0.260224	0.295825	-0.0133185	-0.105012	0.235038	-0.306497
FBgn0085732	FBgn0035243	CR40190	CG13926	0.155785	-0.228731	-0.0062879	0.211725	-0.12284	-0.209649	0.261504	-0.0208316	-0.401007	-0.0782891	0.198327	-0.605054
FBgn0085732	FBgn0034817	CR40190	Art7	-0.061157	-0.0452235	-0.506337	-0.132949	-0.0642038	0.304001	-0.214036	-0.38786	-0.240929	-0.121233	-0.305729	0.0536156
FBgn0085732	FBgn0014073	CR40190	Tie	0.553378	0.691873	0.549564	0.696711	0.158841	0.0685135	0.20362	0.333903	0.111159	0.3742	0.404679	0.00572014
FBgn0085732	FBgn0038173	CR40190	Adgf-C	0.0368009	0.149451	0.220891	-0.206768	0.285598	0.271639	-0.128148	0.0277469	0.181764	-0.0256979	-0.192265	0.222146
FBgn0085732	FBgn0037975	CR40190	CG3397	-0.288259	-0.218749	-0.497802	-0.196119	0.0616579	0.0710338	-0.230342	-0.345087	0.00648852	-0.123453	-0.0757278	0.015709
FBgn0085732	FBgn0032399	CR40190	CG6785	0.126435	0.821296	0.391393	0.70879	0.498034	0.763661	-0.0145992	0.261846	0.627081	0.178349	0.541791	0.753351
FBgn0085732	FBgn0036550	CR40190	CG17026	-0.255021	-0.349435	-0.104666	-0.635256	0.429492	0.150246	-0.309827	-0.00819602	0.438402	-0.244259	-0.544011	0.107573
FBgn0085732	FBgn0035670	CR40190	CG10472	0.241239	-0.333616	0.189905	-0.261105	0.21972	0.197462	0.189448	0.10006	0.237172	-0.0411509	-0.27414	0.103133
FBgn0085732	FBgn0039777	CR40190	Jon99Fii	-0.252983	-0.451153	0.00767288	-0.446462	0.358576	0.288485	-0.329804	0.0391019	0.422949	-0.213609	-0.447878	0.301375
FBgn0085732	FBgn0002962	CR40190	nos	-0.184469	-0.403871	-0.301038	-0.27571	-0.120096	0.0970003	-0.139503	-0.302228	-0.219756	-0.236916	-0.0718006	-0.59148
FBgn0085732	FBgn0037408	CR40190	NPFR	-0.124504	-0.611043	0.0760247	0.194718	-0.126024	0.0484989	-0.140015	0.131222	-0.193802	-0.265175	-0.012294	0.114147
FBgn0085732	FBgn0039494	CR40190	grass	0.111926	0.030792	-0.203841	-0.192985	0.474871	0.111935	-0.017075	0.0709468	0.415692	-0.0421754	-0.302741	0.115086
FBgn0085732	FBgn0015036	CR40190	Cyp4ae1	0.145107	0.388986	-0.0605209	-0.197858	0.159635	0.253673	-0.0388457	-0.0253564	0.0784598	0.251259	-0.179715	0.249552
FBgn0085732	FBgn0267828	CR40190	Fatp	-0.0575542	-0.23694	-0.301589	-0.384343	0.202166	0.461899	-0.222659	-0.121062	0.137881	-0.142064	-0.28558	0.283702
FBgn0085732	FBgn0038034	CR40190	Cyp9f3	-0.331475	0.130382	-0.546897	-0.426949	0.148776	-0.113469	-0.388799	-0.347477	0.122513	-0.0125502	-0.406898	-0.103219
FBgn0085732	FBgn0022702	CR40190	Cht2	-0.19933	-0.49815	-0.621006	-0.257687	-0.0898678	0.228485	-0.185862	-0.505848	-0.0469564	-0.181764	-0.255272	-0.0695808
FBgn0085732	FBgn0032470	CR40190	CG5142	0.106077	0.535762	0.379756	-0.232121	0.683775	0.650694	-0.000597627	0.303509	0.62913	0.278579	-0.0825578	0.553317
FBgn0085732	FBgn0069973	CR40190	CG40485	-0.0766356	-0.441851	0.288544	0.2069	0.323025	0.193062	-0.204986	0.167848	0.340647	-0.168189	0.244429	0.132588
FBgn0085732	FBgn0031141	CR40190	CG1304	0.41714	0.228879	-0.505366	-0.353859	0.763903	0.801447	0.335439	-0.262128	0.781183	0.132588	-0.488384	0.692905
FBgn0085732	FBgn0013771	CR40190	Cyp6a9	-0.401023	0.33248	-0.130338	-0.399152	-0.17975	-0.479312	-0.434048	-0.151883	-0.622642	0.0819602	-0.425937	-0.68027
FBgn0085732	FBgn0031935	CR40190	CG13793	0.25772	0.28934	-0.0372588	-0.136337	-0.0881733	-0.543257	0.169384	-0.107914	-0.263553	0.24221	-0.341586	-0.594297
FBgn0085732	FBgn0029906	CR40190	xit	-0.586838	-0.144823	-0.594025	-0.361825	0.30854	0.426936	-0.544438	-0.460941	0.220524	-0.14326	-0.521301	0.222061
FBgn0085732	FBgn0035227	CR40190	Iml1	0.491444	-0.075008	0.798256	0.683421	-0.0457158	-0.0336694	0.346453	0.259114	-0.0996329	0.0227098	0.398105	0.012294
FBgn0085732	FBgn0040725	CR40190	CG13946	-0.0903529	0.412436	-0.176056	-0.283619	-0.0271289	-0.330119	-0.264334	-0.261057	-0.114128	0.19457	-0.355844	-0.100657
FBgn0085732	FBgn0260874	CR40190	Ir76a	0.208865	-0.00567107	0.207521	0.546951	-0.485099	-0.292759	0.212157	0.214292	-0.706053	-0.0630923	0.135576	-0.400666
FBgn0085732	FBgn0031307	CR40190	MFS3	0.362005	0.299147	0.569099	-0.0374053	0.201104	-0.124495	0.0162213	0.417656	0.221719	0.142747	-0.247417	-0.210023
FBgn0085732	FBgn0259748	CR40190	CG42397	-0.0854892	-0.253869	0.0286161	-0.473953	0.378731	0.300624	-0.148809	0.0519935	0.36293	-0.099206	-0.482968	0.231367
FBgn0085732	FBgn0040554	CR40190	CR17025	-0.244293	-0.180277	0.325816	-0.521064	-0.154116	-0.211081	-0.219244	0.251942	-0.364979	-0.230342	-0.288654	-0.557842
FBgn0085732	FBgn0034494	CR40190	CG10444	-0.662625	-0.500196	-0.594724	-0.510295	-0.138047	0.15549	-0.572868	-0.391445	-0.137454	-0.324767	-0.511654	-0.0578844
FBgn0085732	FBgn0015568	CR40190	alpha-Est1	-0.332568	0.0855636	-0.13936	-0.147674	-0.331427	-0.45055	-0.368394	-0.133868	-0.602749	0.00435414	-0.300862	-0.556732
FBgn0085732	FBgn0260720	CR40190	CR42547	-0.0509103	0.30161	0.671179	0.633619	0.279222	0.735697	-0.0876804	0.412704	0.200205	0.275079	0.487066	0.595578
FBgn0085732	FBgn0035666	CR40190	Jon65Aii	0.384563	0.0362862	-0.196601	-0.515965	0.441764	0.265089	0.243661	-0.107573	0.44489	0.0451635	-0.465551	0.335695
FBgn0085732	FBgn0031735	CR40190	CG11029	0.229718	0.227876	0.13114	0.193661	0.364256	0.211566	0.00110988	0.0548109	0.337488	0.135234	-0.0406386	0.108512
FBgn0085732	FBgn0036483	CR40190	CG12316	0.369516	0.0660064	0.744551	0.773901	-0.115207	0.129642	0.272859	0.233245	-0.112695	0.187142	0.635362	-0.172031
FBgn0085732	FBgn0032147	CR40190	IP3K1	0.316363	0.16519	0.690925	0.729354	0.155121	0.585169	0.0406386	0.329207	-0.00537864	-0.0495176	0.565269	0.640826
FBgn0085732	FBgn0035667	CR40190	Jon65Ai	-0.131877	-0.632583	-0.260334	-0.373646	0.479351	0.383672	-0.14104	-0.152822	0.42201	-0.0587382	-0.446598	0.250491
FBgn0085732	FBgn0029603	CR40190	CG14053	-0.50678	-0.29545	-0.23933	-0.274803	-0.112083	0.0668472	-0.473832	-0.329207	-0.398617	-0.19235	-0.0979254	-0.103731
FBgn0085732	FBgn0002869	CR40190	MtnB	0.0826954	0.637208	0.404633	0.659697	0.0935923	0.00164221	-0.0178434	0.259626	0.0266371	0.251772	0.407069	-0.0119525
FBgn0085732	FBgn0033451	CR40190	CG1665	-0.239791	-0.147807	-0.727669	-0.835461	0.0379992	-0.0517611	-0.332963	-0.519337	-0.0767523	-0.38914	-0.62119	-0.199522
FBgn0085732	FBgn0033205	CR40190	CG2064	0.25405	0.00113169	-0.314833	-0.378933	0.459163	0.398975	0.0736788	-0.143004	0.424742	-0.0762401	-0.339879	0.305899
FBgn0085732	FBgn0051097	CR40190	CG31097	0.616698	0.316664	0.129954	0.16426	0.601106	0.486368	0.402459	0.203108	0.531632	0.135917	0.104841	0.448988
FBgn0085732	FBgn0038674	CR40190	CG14285	0.0609091	-0.0264409	0.0284237	0.00140231	0.43788	0.573673	-0.194997	0.0369675	0.45838	-0.153932	-0.00614702	0.483565
FBgn0085732	FBgn0264721	CR40190	CR43989	0.13588	0.599159	0.295991	0.150902	-0.478375	-0.591079	0.0561769	0.185264	-0.695979	0.293093	0.230855	-0.690173
FBgn0085732	FBgn0051664	CR40190	CG31664	0.208589	0.274537	-0.201308	-0.386305	0.05654	-0.315226	0.286092	-0.0243319	-0.0825578	0.18535	-0.288824	-0.446683
FBgn0004426	FBgn0053282	LysC	CG33282	0.278523	-0.206681	0.419014	0.380433	0.476069	0.582052	0.0195593	0.380176	0.49603	-0.324581	0.330317	0.479126
FBgn0004426	FBgn0262887	LysC	CR43242	-0.317738	-0.50418	-0.0271757	-0.136817	-0.0675979	-0.138713	-0.565596	-0.3129	-0.0815333	-0.62666	-0.188252	-0.210108
FBgn0004426	FBgn0261429	LysC	CR42646	0.24786	0.0156103	0.242728	0.464985	0.37516	0.677665	0.0671336	0.212328	0.699394	0.0424405	0.253394	0.62674
FBgn0004426	FBgn0030628	LysC	CG9114	0.0801479	0.283423	0.172054	0.139667	-0.31019	0.236941	0.123164	0.165799	-0.571502	0.276846	0.168872	0.164689
FBgn0004426	FBgn0035767	LysC	Cln7	0.642558	0.241763	0.277954	0.045972	0.346378	0.121449	0.539887	0.256723	0.378298	0.423765	0.105951	0.126953
FBgn0004426	FBgn0030773	LysC	CG9676	0.289418	-0.323353	-0.0542511	-0.260277	0.315506	-0.0818104	0.106508	-0.201656	0.235721	-0.450109	-0.338086	0.0328695
FBgn0004426	FBgn0004872	LysC	piwi	-0.187297	0.179869	-0.416809	-0.276647	-0.153758	0.18327	-0.520243	-0.497055	-0.409886	-0.294052	-0.306497	-0.371382
FBgn0004426	FBgn0031726	LysC	Cyp6a16	0.638393	0.247623	-0.158515	-0.114704	-0.222464	-0.2695	0.371883	-0.444805	-0.331768	0.108236	-0.281567	-0.549475
FBgn0004426	FBgn0039612	LysC	CG14523	0.741218	0.395029	0.34302	0.0961111	-0.175005	-0.0779006	0.473437	0.125331	-0.0676172	0.351778	0.0498591	-0.0934005
FBgn0004426	FBgn0039525	LysC	CG5646	0.346389	0.149585	0.301387	-0.461942	0.0557181	0.134153	0.376153	0.176727	0.281909	0.167457	-0.170921	0.102621
FBgn0004426	FBgn0263763	LysC	CG43680	0.818253	0.841374	0.748122	0.456724	0.151655	0.0681307	0.699009	0.578759	0.137796	0.797404	0.299752	-0.00332963
FBgn0004426	FBgn0037225	LysC	TwdlG	0.570971	-0.0234807	0.569094	0.140455	0.417728	0.549101	0.460625	0.344574	0.461112	0.0956834	0.0256126	0.577307
FBgn0004426	FBgn0039886	LysC	CG2003	0.0851683	-0.0681386	0.0566446	0.307035	-0.190746	-0.440984	-0.234199	-0.0494323	-0.424144	-0.365399	0.116879	-0.629301
FBgn0004426	FBgn0036787	LysC	CG4306	0.319192	-0.196857	-0.205456	-0.180806	-0.0992884	-0.123857	-0.0528698	-0.238538	-0.302399	-0.351479	-0.25365	-0.251942
FBgn0004426	FBgn0030993	LysC	Mec2	0.564567	0.336264	0.481205	0.287084	0.527953	0.3055	0.645115	0.349868	0.48126	0.443021	0.330573	0.266968
FBgn0004426	FBgn0037230	LysC	CG9780	0.535595	0.147645	0.676108	0.385052	0.52355	0.358799	0.434404	0.437292	0.451464	0.163699	0.326902	0.246393
FBgn0004426	FBgn0050428	LysC	CG30428	0.0778169	0.14007	0.586192	0.207524	0.052755	0.0672657	0.250598	0.551012	0.0336378	0.40532	0.17852	0.0107148
FBgn0004426	FBgn0267408	LysC	AOX1	0.380292	0.21364	0.0479724	0.416646	0.414173	0.339582	0.403826	0.0480663	0.305473	0.18492	0.400581	0.355759
FBgn0004426	FBgn0261509	LysC	haf	0.476386	0.29141	0.483943	0.165822	0.523199	0.460946	0.688845	0.489029	0.544011	0.473379	0.182276	0.48126
FBgn0004426	FBgn0262007	LysC	CG42825	0.440148	0.274297	0.0569776	0.542538	-0.212282	-0.0192036	0.45644	0.23427	-0.151029	0.325264	0.404081	-0.0216853
FBgn0004426	FBgn0030600	LysC	hiw	0.432883	-0.193679	-0.0147157	-0.0923395	0.610981	0.762438	0.235993	-0.138991	0.628959	-0.333163	-0.269956	0.679758
FBgn0004426	FBgn0037000	LysC	ZnT77C	0.465452	0.459649	0.703498	0.172025	0.313701	0.052683	0.635975	0.54273	0.432255	0.5475	0.088278	0.104243
FBgn0004426	FBgn0040342	LysC	CG3706	0.311566	0.0596284	-0.00943948	0.163747	0.100186	-0.027066	0.113512	-0.290703	-0.130453	-0.127023	0.0210877	-0.0764962
FBgn0004426	FBgn0030367	LysC	Cyp311a1	0.61778	0.326355	0.405972	0.243829	0.143216	0.143675	0.366502	0.342269	0.11944	0.200547	0.235977	0.0762401
FBgn0004426	FBgn0027934	LysC	alpha-Est4aPsi	0.4109	-0.0889146	0.54253	0.564923	0.193275	-0.0397173	0.300905	0.508751	0.182959	-0.0925238	0.457526	-0.196107
FBgn0004426	FBgn0035243	LysC	CG13926	0.627949	0.736056	0.0111108	0.355412	-0.00920619	-0.0846751	0.664247	0.144199	-0.274737	0.707869	0.222915	-0.34927
FBgn0004426	FBgn0034817	LysC	Art7	0.648424	0.36335	0.011654	0.210966	-0.0920467	0.259434	0.511958	-0.0218561	-0.281909	0.406345	0.1547	0.188167
FBgn0004426	FBgn0014073	LysC	Tie	-0.238175	-0.467052	0.405914	-0.0613173	0.252962	-0.0268515	-0.54262	0.159396	0.190557	-0.71359	-0.185093	-0.0595065
FBgn0004426	FBgn0038173	LysC	Adgf-C	0.246143	0.155011	0.46945	0.507261	0.175293	0.253956	0.0514178	0.302143	0.259968	0.170146	0.222402	0.336208
FBgn0004426	FBgn0037975	LysC	CG3397	0.574211	0.486528	-0.16498	0.321473	-0.114378	-0.122691	0.145029	0.0370528	-0.232904	0.601511	0.2481	-0.128404
FBgn0004426	FBgn0032399	LysC	CG6785	-0.164627	-0.17462	0.256169	-0.0649516	0.315924	0.622245	-0.113085	0.450696	0.648681	-0.0586226	0.0239051	0.625459
FBgn0004426	FBgn0036550	LysC	CG17026	0.302153	-0.0882452	0.153154	0.459034	0.087575	0.0507347	-0.0602152	0.124989	0.179459	-0.351394	0.281141	0.00546401
FBgn0004426	FBgn0035670	LysC	CG10472	0.521321	0.480017	0.271915	0.6093	0.318677	0.546735	0.471473	0.248527	0.450952	0.349088	0.503202	0.544779
FBgn0004426	FBgn0039777	LysC	Jon99Fii	0.172393	0.0885693	0.0118967	0.177425	0.340567	0.653313	-0.149129	-0.238709	0.449757	-0.314461	-0.0614702	0.585247
FBgn0004426	FBgn0002962	LysC	nos	-0.382809	0.227991	-0.377889	-0.256487	-0.0598537	0.1592	-0.519474	-0.324426	-0.290959	-0.316383	-0.117647	-0.558354
FBgn0004426	FBgn0037408	LysC	NPFR	0.475367	0.516945	0.0236719	0.249475	-0.168839	0.355705	0.616502	0.0410655	-0.0401264	0.51488	0.196363	0.350124
FBgn0004426	FBgn0039494	LysC	grass	0.749703	0.414894	0.420684	0.429668	0.250187	0.113465	0.441835	0.324682	0.406215	0.359805	0.28447	0.263212
FBgn0004426	FBgn0015036	LysC	Cyp4ae1	0.519126	0.176237	-0.0111345	0.437278	0.290682	0.438546	0.407585	-0.120379	0.228123	0.182742	0.325621	0.520703
FBgn0004426	FBgn0267828	LysC	Fatp	0.696268	0.481897	0.0975339	0.414885	0.0808518	0.580569	0.468312	0.0226244	0.0973278	0.47752	0.199863	0.58815
FBgn0004426	FBgn0038034	LysC	Cyp9f3	0.193393	-0.166693	-0.208283	0.208038	-0.0992245	-0.249249	-0.256491	-0.26509	-0.0948519	-0.490244	0.055067	-0.219414
FBgn0004426	FBgn0022702	LysC	Cht2	0.456568	0.551629	0.152125	0.312838	-0.00710049	0.260319	0.24385	0.0677879	-0.0363698	0.517869	0.229489	0.260565
FBgn0004426	FBgn0032470	LysC	CG5142	0.200507	-0.334556	0.409945	0.608276	0.365804	0.558083	0.0924155	0.399215	0.548621	-0.20836	0.311961	0.538205
FBgn0004426	FBgn0069973	LysC	CG40485	0.549544	0.309945	0.436795	-0.0467295	0.0552196	-0.0100104	0.388879	0.440109	0.317169	0.265317	0.0259541	0.265858
FBgn0004426	FBgn0031141	LysC	CG1304	0.527295	0.433033	-0.0901348	0.397893	0.885028	0.86598	0.403229	-0.153997	0.835226	0.600102	0.162368	0.79527
FBgn0004426	FBgn0013771	LysC	Cyp6a9	-0.0763602	-0.310806	-0.142233	-0.362244	-0.227182	-0.591194	-0.210881	-0.528302	-0.684453	-0.530251	-0.473406	-0.782379
FBgn0004426	FBgn0031935	LysC	CG13793	0.31117	-0.0951475	-0.164288	-0.237074	-0.0905751	-0.199035	-0.0675606	-0.506873	-0.38009	-0.26092	-0.419875	-0.60642
FBgn0004426	FBgn0029906	LysC	xit	0.378059	0.341605	-0.147306	0.0547792	0.170914	0.459706	0.123505	-0.497823	0.17169	0.356475	-0.056433	0.493469
FBgn0004426	FBgn0035227	LysC	Iml1	0.447482	0.415208	0.231412	0.0723792	0.339118	0.270525	0.498463	0.0452489	0.227354	0.516801	0.0391872	0.220439
FBgn0004426	FBgn0040725	LysC	CG13946	-0.205473	-0.371387	-0.302947	-0.477509	0.275158	-0.104133	-0.633658	-0.364823	0.0688271	-0.828359	-0.553744	0.00546401
FBgn0004426	FBgn0260874	LysC	Ir76a	0.793006	0.363585	0.507062	0.397564	-0.465409	-0.170971	0.770926	0.265602	-0.575002	0.635028	0.231879	-0.313583
FBgn0004426	FBgn0031307	LysC	MFS3	0.172725	0.166411	0.381605	0.342972	0.292723	0.197954	0.185002	0.257321	0.370955	-0.0213057	0.196022	0.210706
FBgn0004426	FBgn0259748	LysC	CG42397	0.364987	0.0994052	0.140503	0.412404	0.0941164	0.328407	0.124616	0.116879	0.242551	-0.156142	0.229403	0.384786
FBgn0004426	FBgn0040554	LysC	CR17025	0.0513257	0.0361181	0.535482	0.364688	-0.20797	-0.346517	-0.12026	0.27542	-0.57005	0.0484181	0.212926	-0.633057
FBgn0004426	FBgn0034494	LysC	CG10444	0.128705	0.225377	-0.193571	-0.0783716	-0.220716	0.231579	-0.152631	-0.472893	-0.257406	-0.0635327	-0.274737	0.0830701
FBgn0004426	FBgn0015568	LysC	alpha-Est1	0.178759	0.0571301	0.107237	0.252118	-0.184917	-0.217235	-0.212248	0.152053	-0.463417	-0.0605013	0.173568	-0.34705
FBgn0004426	FBgn0260720	LysC	CR42547	-0.00359474	-0.486929	0.341027	0.10737	0.142806	0.577259	-0.28536	0.444037	0.331853	-0.692925	0.186118	0.635106
FBgn0004426	FBgn0035666	LysC	Jon65Aii	0.111834	-0.254057	-0.017488	0.134664	0.321677	0.607051	-0.0995046	-0.186545	0.657901	-0.316127	-0.0677879	0.606164
FBgn0004426	FBgn0031735	LysC	CG11029	0.796965	0.178596	0.537482	-0.143706	0.142129	0.23944	0.510506	0.416631	0.311107	0.0985867	0.0230513	0.222146
FBgn0004426	FBgn0036483	LysC	CG12316	-0.463718	0.117116	0.12345	-0.0610732	0.194028	0.125859	-0.462419	-0.0376505	-0.102194	0.0367192	0.0540425	-0.0899001
FBgn0004426	FBgn0032147	LysC	IP3K1	-0.390839	0.279398	0.458163	0.390783	0.46943	0.551485	-0.549453	0.553231	0.162128	0.464327	0.360198	0.666866
FBgn0004426	FBgn0035667	LysC	Jon65Ai	0.47824	0.321708	0.100502	0.340626	0.322746	0.448871	0.268961	0.0169897	0.367711	0.171769	0.173482	0.473491
FBgn0004426	FBgn0029603	LysC	CG14053	-0.160232	0.526043	-0.293685	-0.0240452	-0.00735665	-0.185715	-0.549112	-0.567404	-0.525911	0.309807	-0.107061	-0.273371
FBgn0004426	FBgn0002869	LysC	MtnB	-0.435226	-0.483766	0.104692	-0.131029	0.048575	-0.157411	-0.489324	0.0152822	0.0941689	-0.632168	-0.132758	-0.0801673
FBgn0004426	FBgn0033451	LysC	CG1665	0.225088	0.0228483	-0.197107	0.164194	-0.0838014	0.0370421	-0.0282713	-0.264322	-0.218902	-0.27945	-0.0239051	-0.126185
FBgn0004426	FBgn0033205	LysC	CG2064	0.75826	0.542772	0.16292	0.460541	0.0831638	0.162179	0.486761	0.316315	0.144199	0.608386	0.362674	0.153932
FBgn0004426	FBgn0051097	LysC	CG31097	0.252844	-0.0959822	0.254663	-0.105216	0.345778	0.5465	0.213615	0.196022	0.501494	0.0300585	-0.172202	0.502177
FBgn0004426	FBgn0038674	LysC	CG14285	0.683822	0.623654	0.577522	0.679159	0.220032	0.386462	0.252221	0.523948	0.35832	0.510909	0.335952	0.468539
FBgn0004426	FBgn0264721	LysC	CR43989	-0.571708	-0.4074	0.0873922	0.28458	-0.316158	-0.467895	-0.621712	-0.00478101	-0.725519	-0.62064	0.145138	-0.59848
FBgn0004426	FBgn0051664	LysC	CG31664	0.0579117	-0.222692	-0.338822	0.0130418	0.00448615	-0.200607	-0.213273	-0.272518	-0.142747	-0.372444	-0.119269	-0.481687
FBgn0053282	FBgn0262887	CG33282	CR43242	0.277595	0.384602	0.219077	0.017904	0.431133	-0.178905	0.233672	0.0321865	0.353539	0.464014	0.053701	0.0860582
FBgn0053282	FBgn0261429	CG33282	CR42646	0.383757	-0.131596	0.18663	0.145236	0.314873	0.566436	0.348587	0.0540425	0.353795	-0.0926321	0.0159652	0.455477
FBgn0053282	FBgn0030628	CG33282	CG9114	-0.258152	-0.64696	-0.0974028	0.45938	-0.737291	0.0648998	-0.241441	-0.14676	-0.635448	-0.413899	0.305046	0.0519081
FBgn0053282	FBgn0035767	CG33282	Cln7	0.261324	-0.461893	0.544949	0.37397	0.807121	0.302752	0.138564	0.17741	0.717835	-0.122684	0.325792	0.367882
FBgn0053282	FBgn0030773	CG33282	CG9676	0.727692	0.694099	0.0368639	-0.372624	0.692908	-0.0831725	0.516435	0.0759839	0.502604	0.519594	-0.241868	0.0162213
FBgn0053282	FBgn0004872	CG33282	piwi	0.0778895	0.193217	-0.582563	-0.245631	-0.609869	-0.0622372	0.0153675	-0.454452	-0.638607	0.535047	-0.201998	-0.160249
FBgn0053282	FBgn0031726	CG33282	Cyp6a16	0.301011	-0.414648	-0.136844	-0.00481913	0.310357	-0.31202	-0.0250149	-0.271664	0.182532	-0.230598	-0.209682	-0.213182
FBgn0053282	FBgn0039612	CG33282	CG14523	0.195732	-0.40489	0.0271275	-0.381769	0.434401	-0.149521	-0.00776914	-0.109963	0.351063	-0.0716298	-0.191326	0.10817
FBgn0053282	FBgn0039525	CG33282	CG5646	0.00346992	-0.595577	0.490847	0.0894534	0.681678	0.312447	0.0130624	0.149407	0.593102	-0.313925	-0.0420046	0.262443
FBgn0053282	FBgn0263763	CG33282	CG43680	0.0873001	-0.239569	0.673737	0.492772	0.450322	-0.32668	-0.0125502	0.365491	0.241441	-0.262187	0.412277	-0.0652267
FBgn0053282	FBgn0037225	CG33282	TwdlG	0.39752	0.464182	0.278734	-0.111954	0.39734	0.367863	0.410313	0.0868266	0.406557	0.410655	0.0195509	0.343379
FBgn0053282	FBgn0039886	CG33282	CG2003	0.388071	0.124987	0.0709013	-0.199006	-0.11879	-0.32722	0.299752	-0.116793	-0.0512251	0.240331	-0.0939127	-0.282763
FBgn0053282	FBgn0036787	CG33282	CG4306	0.476037	0.159041	0.19893	-0.0111394	0.0394149	-0.0171879	0.163664	0.142064	0.0744472	0.197985	0.123453	0.211133
FBgn0053282	FBgn0030993	CG33282	Mec2	0.0716191	-0.543308	0.140757	0.299637	0.671807	0.191888	-0.0286007	0.153163	0.518996	-0.18774	0.0887049	0.209767
FBgn0053282	FBgn0037230	CG33282	CG9780	0.0207224	-0.531157	0.53087	0.477152	0.616154	0.101124	-0.0916076	0.390165	0.614616	-0.153249	0.38453	0.253821
FBgn0053282	FBgn0050428	CG33282	CG30428	-0.234361	-0.07919	0.350024	0.295662	0.39783	0.415264	-0.227781	0.113464	0.307948	-0.00426876	0.269017	0.257369
FBgn0053282	FBgn0267408	CG33282	AOX1	-0.0189427	-0.419561	0.029734	0.181944	0.332237	0.209361	-0.0384189	0.10134	0.35149	-0.132844	0.0854606	0.231367
FBgn0053282	FBgn0261509	CG33282	haf	0.035859	-0.587741	0.71066	0.227771	0.666243	0.312659	-0.101597	0.532229	0.642278	-0.427901	0.134124	0.143857
FBgn0053282	FBgn0262007	CG33282	CG42825	-0.138577	-0.425997	-0.0687998	0.353438	0.304566	0.0939473	-0.145138	0.0990353	0.232562	-0.195339	0.234696	0.162042
FBgn0053282	FBgn0030600	CG33282	hiw	0.149474	0.30978	0.307556	-0.0219022	0.854076	0.803714	0.144796	0.179544	0.648083	0.238026	-0.0710322	0.513447
FBgn0053282	FBgn0037000	CG33282	ZnT77C	-0.0887999	0.248148	0.289915	-0.160054	0.232131	-0.118098	0.0079399	0.1115	0.341757	0.293349	0.010928	0.100316
FBgn0053282	FBgn0040342	CG33282	CG3706	0.822175	0.766322	-0.156337	-0.316111	0.352427	-0.381599	0.701528	-0.270383	0.250064	0.588833	-0.228123	-0.131563
FBgn0053282	FBgn0030367	CG33282	Cyp311a1	0.431429	-0.396935	0.449013	0.0677681	0.529837	-0.202907	0.312388	0.165286	0.380603	0.0116964	0.143516	0.0377358
FBgn0053282	FBgn0027934	CG33282	alpha-Est4aPsi	0.712083	0.776162	0.756792	0.601381	0.73787	-0.159131	0.646632	0.422351	0.526253	0.530009	0.530778	0.010928
FBgn0053282	FBgn0035243	CG33282	CG13926	-0.0914467	-0.501401	0.0351283	0.540584	-0.209451	-0.455732	-0.214036	-0.0096474	-0.412533	-0.388628	0.368479	-0.40963
FBgn0053282	FBgn0034817	CG33282	Art7	0.356591	-0.684162	-0.0183085	0.0828198	0.230594	0.294328	0.318364	-0.0844361	0.146333	-0.337232	0.0336378	0.280543
FBgn0053282	FBgn0014073	CG33282	Tie	-0.00438759	0.187377	0.536069	0.0270399	0.541415	0.0516614	-0.0643729	0.29241	0.398532	0.232562	-0.0802527	-0.0457611
FBgn0053282	FBgn0038173	CG33282	Adgf-C	0.185058	-0.338988	0.547823	0.034256	0.636676	0.328054	0.246137	0.291471	0.492103	-0.202595	0.0733373	0.327499
FBgn0053282	FBgn0037975	CG33282	CG3397	0.648138	-0.166376	0.160635	0.371095	0.000730662	0.0663064	0.485785	0.237172	0.122855	0.0274054	0.41757	0.365235
FBgn0053282	FBgn0032399	CG33282	CG6785	0.231212	-0.101816	0.571443	0.462617	0.458262	0.793276	0.293179	0.451208	0.496969	-0.127551	0.367455	0.585076
FBgn0053282	FBgn0036550	CG33282	CG17026	0.739377	0.718209	0.408413	0.0107683	0.592658	0.188766	0.51874	0.212072	0.447366	0.546572	-0.0173312	0.330231
FBgn0053282	FBgn0035670	CG33282	CG10472	0.346683	-0.0859665	0.491713	0.0360401	0.730381	0.379953	0.162554	0.228379	0.60531	0.00239051	-0.0395287	0.252625
FBgn0053282	FBgn0039777	CG33282	Jon99Fii	0.690574	0.502833	0.204585	-0.135083	0.726442	0.531877	0.527704	-0.011611	0.553914	0.282933	-0.297618	0.267737
FBgn0053282	FBgn0002962	CG33282	nos	-0.14971	0.0935611	-0.524468	-0.561929	-0.57565	-0.0917435	-0.148041	-0.337403	-0.536327	0.217365	-0.249552	-0.361906
FBgn0053282	FBgn0037408	CG33282	NPFR	0.368614	0.283252	0.122933	0.180822	0.326185	0.137364	0.381371	0.0566891	0.267481	0.144711	0.0339793	0.224964
FBgn0053282	FBgn0039494	CG33282	grass	0.170196	-0.538409	0.415322	0.0557005	0.761681	0.539374	0.0969009	0.265602	0.539145	-0.138991	0.0461026	0.560061
FBgn0053282	FBgn0015036	CG33282	Cyp4ae1	0.116938	-0.217572	0.153211	-0.0949221	0.662917	0.436726	0.263468	0.0112695	0.537096	0.105951	-0.0096474	0.384445
FBgn0053282	FBgn0267828	CG33282	Fatp	0.456733	-0.355064	0.278936	0.0877144	0.573161	0.794345	0.308973	0.0653974	0.423632	-0.0135747	0.108	0.554427
FBgn0053282	FBgn0038034	CG33282	Cyp9f3	0.474812	0.632236	-0.024333	-0.120604	0.235263	-0.137063	0.397336	-0.0836677	0.205327	0.563818	-0.055067	0.13643
FBgn0053282	FBgn0022702	CG33282	Cht2	0.369082	-0.166269	-0.251594	0.14561	-0.384658	0.138289	0.316059	-0.043456	-0.26509	-0.0459319	0.147358	0.195595
FBgn0053282	FBgn0032470	CG33282	CG5142	0.5088	0.312337	0.68046	0.180781	0.846534	0.77467	0.282763	0.506958	0.63246	0.197388	0.223085	0.495347
FBgn0053282	FBgn0069973	CG33282	CG40485	0.543152	0.0636127	0.912107	0.382357	0.729509	0.334991	0.447537	0.632545	0.607786	0.134295	0.356868	0.270725
FBgn0053282	FBgn0031141	CG33282	CG1304	0.238452	-0.248896	-0.359218	-0.261601	0.669941	0.671524	0.1296	-0.142894	0.547682	-0.174422	-0.197557	0.540596
FBgn0053282	FBgn0013771	CG33282	Cyp6a9	0.4452	0.0989598	-0.19526	-0.549374	-0.230005	-0.372568	0.44378	-0.40169	-0.27986	0.168018	-0.462904	-0.331597
FBgn0053282	FBgn0031935	CG33282	CG13793	0.389842	0.0280604	-0.00822199	-0.494092	0.074068	-0.249445	0.128917	-0.301545	0.00546401	0.0926321	-0.539913	-0.192777
FBgn0053282	FBgn0029906	CG33282	xit	0.589195	-0.441762	-0.221095	-0.0749793	0.680778	0.648159	0.479382	-0.428327	0.50047	-0.181508	-0.0269786	0.539145
FBgn0053282	FBgn0035227	CG33282	Iml1	0.0318882	-0.688482	0.431101	0.421346	0.187035	0.0300325	-0.0969863	0.0796551	0.154017	-0.301118	0.269188	0.218987
FBgn0053282	FBgn0040725	CG33282	CG13946	0.0827902	0.328578	0.0777049	-0.152913	0.0290939	-0.489772	0.0894882	-0.0517916	0.148713	0.275591	-0.300265	0.00785452
FBgn0053282	FBgn0260874	CG33282	Ir76a	0.196947	-0.183142	0.467626	0.203282	-0.244837	-0.40818	0.0377358	0.0860582	-0.369419	-0.210194	0.110646	-0.363784
FBgn0053282	FBgn0031307	CG33282	MFS3	-0.219086	-0.0631792	0.593023	-0.0235633	0.659257	0.279788	-0.0828993	0.343379	0.500811	0.153163	-0.0666781	0.204303
FBgn0053282	FBgn0259748	CG33282	CG42397	0.527914	0.623524	0.103868	-0.165188	0.736973	0.559354	0.281994	-0.0870827	0.5289	0.397251	-0.11039	0.422863
FBgn0053282	FBgn0040554	CG33282	CR17025	0.735118	0.584988	0.701632	0.051723	-0.123958	-0.276205	0.473662	0.536071	-0.150346	0.358661	0.0642875	-0.252113
FBgn0053282	FBgn0034494	CG33282	CG10444	0.565157	0.452986	-0.527532	-0.485399	-0.414322	-0.232475	0.430035	-0.508666	-0.485358	0.416716	-0.412875	-0.00281738
FBgn0053282	FBgn0015568	CG33282	alpha-Est1	0.592157	-0.309506	0.413729	0.0510085	0.0935674	-0.365092	0.378468	0.176983	0.0469564	0.099889	0.0168189	-0.0899855
FBgn0053282	FBgn0260720	CG33282	CR42547	0.518398	0.289833	0.818488	0.482523	0.762975	0.56988	0.446427	0.527021	0.581064	0.305131	0.432255	0.459233
FBgn0053282	FBgn0035666	CG33282	Jon65Aii	0.360021	0.0881439	-0.0630773	-0.401686	0.730725	0.465241	0.099206	-0.0842653	0.617604	-0.0806796	-0.379493	0.342269
FBgn0053282	FBgn0031735	CG33282	CG11029	0.237957	-0.523026	0.766188	0.118112	0.728608	0.319585	0.0957056	0.446512	0.527704	-0.125587	0.132332	0.305216
FBgn0053282	FBgn0036483	CG33282	CG12316	-0.501823	-0.611988	0.118018	0.250564	-0.538369	-0.146193	-0.411679	0.0440536	-0.449501	-0.542389	0.221634	-0.414326
FBgn0053282	FBgn0032147	CG33282	IP3K1	-0.321847	0.0209486	0.7651	0.508236	0.430702	0.409892	-0.207547	0.563391	0.217792	0.0330402	0.536839	0.462392
FBgn0053282	FBgn0035667	CG33282	Jon65Ai	0.575443	0.240796	0.0708243	-0.0749129	0.789119	0.612992	0.2913	-0.0493469	0.53129	0.0881072	-0.0887902	0.407667
FBgn0053282	FBgn0029603	CG33282	CG14053	0.32861	-0.264472	-0.0863149	0.24709	-0.0955465	0.148323	0.429352	-0.308461	-0.103816	-0.137539	0.133612	0.214121
FBgn0053282	FBgn0002869	CG33282	MtnB	-0.157833	0.457645	0.168787	0.213307	0.349116	-0.165987	-0.0749594	0.117562	0.221549	0.348758	0.147699	-0.158713
FBgn0053282	FBgn0033451	CG33282	CG1665	0.604825	-0.0960137	-0.067813	-0.0741692	0.152595	0.164793	0.446769	-0.218646	0.0314181	0.145736	-0.190387	0.211389
FBgn0053282	FBgn0033205	CG33282	CG2064	0.145674	-0.339786	0.0619516	0.157487	0.00111721	0.251626	0.135234	0.0213438	0.0537864	-0.197985	0.202595	0.233928
FBgn0053282	FBgn0051097	CG33282	CG31097	0.239357	-0.163765	0.575005	0.231937	0.81921	0.792109	0.168189	0.357466	0.654913	-0.227354	0.176385	0.452318
FBgn0053282	FBgn0038674	CG33282	CG14285	0.473351	-0.328421	0.579755	0.328098	0.809574	0.846202	0.345684	0.341757	0.609152	-0.160847	0.30368	0.655596
FBgn0053282	FBgn0264721	CG33282	CR43989	-0.32213	0.306506	0.00459234	0.0780424	-0.492724	-0.865772	-0.212243	-0.267224	-0.504653	0.436694	-0.0492615	-0.499189
FBgn0053282	FBgn0051664	CG33282	CG31664	0.024889	0.465303	-0.433588	-0.344123	0.197504	-0.240081	-0.00887902	-0.241014	0.0951934	0.56083	-0.279348	-0.030479
FBgn0262887	FBgn0261429	CR43242	CR42646	0.11769	0.0433772	-0.180359	-0.663667	-0.147342	-0.344969	-0.0965594	-0.284299	-0.372663	-0.338257	-0.587552	-0.47443
FBgn0262887	FBgn0030628	CR43242	CG9114	-0.0971222	-0.37123	-0.651151	0.0850907	-0.32276	0.129062	-0.178007	-0.52224	-0.357893	-0.32545	0.0926321	-0.0874242
FBgn0262887	FBgn0035767	CR43242	Cln7	-0.20794	-0.319586	0.156058	0.0656132	0.491134	0.035838	-0.278238	-0.0361137	0.360369	-0.30385	0.0636899	0.0595919
FBgn0262887	FBgn0030773	CR43242	CG9676	0.288012	0.39045	0.387894	0.289951	0.52463	-0.329347	0.402715	0.345599	0.561684	0.466917	0.286605	-0.0312473
FBgn0262887	FBgn0004872	CR43242	piwi	0.27611	-0.0656839	0.159476	0.0871807	-0.288633	0.09118	0.366943	0.0426022	-0.494835	0.389567	-0.0798258	0.0364552
FBgn0262887	FBgn0031726	CR43242	Cyp6a16	-0.0557219	-0.235215	0.361978	0.0333501	0.748271	0.216017	-0.0945957	0.395373	0.525997	-0.111415	0.174422	0.266712
FBgn0262887	FBgn0039612	CR43242	CG14523	-0.160737	-0.342262	-0.02004	-0.0890571	0.587786	0.190517	-0.307607	-0.137454	0.37659	-0.314522	0.0122087	0.18996
FBgn0262887	FBgn0039525	CR43242	CG5646	-0.152372	-0.269064	0.255197	0.280831	0.359251	0.0438976	-0.147102	0.140528	0.38103	-0.158371	0.19329	0.116196
FBgn0262887	FBgn0263763	CR43242	CG43680	-0.262769	-0.407673	-0.00657434	0.287059	0.729494	0.297651	-0.534449	-0.1547	0.428925	-0.448135	0.285068	0.220524
FBgn0262887	FBgn0037225	CR43242	TwdlG	-0.145229	-0.249561	0.191532	0.190764	0.396162	0.0816976	-0.134124	0.141125	0.178178	0.0369675	0.183984	-0.0467856
FBgn0262887	FBgn0039886	CR43242	CG2003	0.556017	0.568839	0.0717372	0.0848412	0.160716	0.22254	0.483224	0.0331256	0.38803	0.356698	0.0943396	0.380773
FBgn0262887	FBgn0036787	CR43242	CG4306	0.195231	0.432669	0.173862	-0.250828	0.0260856	-0.27204	-0.0313327	0.0865705	0.1366	0.331768	-0.238538	0.0438829
FBgn0262887	FBgn0030993	CR43242	Mec2	-0.315665	-0.366364	-0.182507	-0.0839527	0.442263	0.211937	-0.46188	0.0788867	0.158115	-0.403483	-0.0207462	0.117049
FBgn0262887	FBgn0037230	CR43242	CG9780	-0.378751	-0.154777	0.209851	0.0238731	0.52156	0.306552	-0.587894	0.0887049	0.258602	-0.151968	-0.0299667	0.21839
FBgn0262887	FBgn0050428	CR43242	CG30428	-0.126992	0.14812	-0.593691	-0.265698	-0.146335	-0.181049	-0.425083	-0.41535	-0.052335	-0.0394434	-0.280884	0.0414932
FBgn0262887	FBgn0267408	CR43242	AOX1	-0.393523	-0.160255	0.472365	0.0107029	0.430505	0.146819	-0.458123	0.337147	0.127038	-0.147016	0.0203193	0.0010245
FBgn0262887	FBgn0261509	CR43242	haf	-0.350103	-0.398068	0.370747	0.382287	0.307194	0.267365	-0.660804	0.209255	0.289081	-0.417826	0.227696	0.0246734
FBgn0262887	FBgn0262007	CR43242	CG42825	-0.215913	-0.17876	0.264337	-0.151775	0.55684	0.279492	-0.406386	0.151285	0.397166	-0.189021	-0.0990353	0.233501
FBgn0262887	FBgn0030600	CR43242	hiw	-0.0457254	0.152618	0.770889	0.349309	0.373267	0.0182395	-0.0696662	0.617775	0.34005	0.322206	0.268334	0.00239051
FBgn0262887	FBgn0037000	CR43242	ZnT77C	-0.419674	-0.342634	-0.0430821	0.513111	0.268621	0.252296	-0.475455	-0.149748	0.150602	-0.231964	0.333561	0.0958764
FBgn0262887	FBgn0040342	CR43242	CG3706	0.361753	0.334021	0.0213449	-0.257392	0.763915	0.400775	0.359857	0.00469564	0.572185	0.409886	-0.154017	0.204388
FBgn0262887	FBgn0030367	CR43242	Cyp311a1	0.049531	-0.276279	0.0821363	-0.140978	0.68356	-0.127381	0.0238197	0.0283446	0.414838	-0.113378	0.0384189	-0.116964
FBgn0262887	FBgn0027934	CR43242	alpha-Est4aPsi	-0.0613574	0.166329	0.00411594	-0.130341	0.760075	0.598125	-0.00597627	-0.0851191	0.61325	0.205413	-0.0321865	0.340647
FBgn0262887	FBgn0035243	CR43242	CG13926	-0.315742	-0.349321	-0.412259	-0.270018	0.237762	0.518402	-0.475455	-0.449415	-0.0369675	-0.484846	-0.267566	0.373773
FBgn0262887	FBgn0034817	CR43242	Art7	-0.0592587	-0.451099	-0.287668	-0.305331	0.4612	0.153067	-0.157688	-0.350295	0.482541	-0.40263	-0.167421	0.00298813
FBgn0262887	FBgn0014073	CR43242	Tie	0.226658	0.384877	0.312841	0.465944	0.292523	0.198935	0.245539	0.200973	0.34244	0.457355	0.376163	0.125587
FBgn0262887	FBgn0038173	CR43242	Adgf-C	0.0363165	-0.226975	0.214758	-0.0186527	0.322406	0.0381403	0.0894732	0.0960471	0.207376	-0.258772	0.123367	-0.0736788
FBgn0262887	FBgn0037975	CR43242	CG3397	0.0611668	-0.208984	-0.280908	-0.311578	0.0407547	-0.300441	0.0410655	-0.210365	0.166226	-0.305814	-0.192948	0.0675318
FBgn0262887	FBgn0032399	CR43242	CG6785	0.0824359	0.121012	0.0961973	0.0831769	0.0191701	-0.268725	0.166994	0.0478101	0.0376505	0.0299667	0.0490054	-0.157773
FBgn0262887	FBgn0036550	CR43242	CG17026	0.437516	0.575817	-0.0471807	-0.410498	0.199289	-0.232163	0.317254	-0.0561769	0.247076	0.488005	-0.307009	0.0308205
FBgn0262887	FBgn0035670	CR43242	CG10472	0.0832807	0.0254307	0.312086	-0.0325724	0.659569	0.299385	-0.160249	0.133612	0.535559	0.0673611	-0.0838385	0.0782037
FBgn0262887	FBgn0039777	CR43242	Jon99Fii	0.448812	0.212807	0.247839	0.0212007	0.408292	0.248001	0.442927	0.167677	0.28669	0.388543	-0.0119525	0.0467002
FBgn0262887	FBgn0002962	CR43242	nos	0.0423025	-0.0488712	-0.137048	0.20231	-0.526833	0.0947017	0.241014	-0.205157	-0.517971	0.226757	-0.0107573	0.0852898
FBgn0262887	FBgn0037408	CR43242	NPFR	-0.166808	-0.341616	-0.114358	-0.117879	0.645887	0.332812	-0.173226	-0.153163	0.451464	-0.275079	-0.171946	0.31401
FBgn0262887	FBgn0039494	CR43242	grass	-0.247333	-0.16959	-0.0487138	-0.0988784	0.108174	-0.0565644	-0.19918	0.033211	0.1582	-0.167506	-0.00785452	0.0430291
FBgn0262887	FBgn0015036	CR43242	Cyp4ae1	-0.292683	-0.00149415	0.361511	0.118543	0.601096	0.174321	-0.189874	0.298301	0.331512	0.0425169	0.0702638	0.0089644
FBgn0262887	FBgn0267828	CR43242	Fatp	-0.0635882	-0.415687	0.00161079	-0.171286	0.458367	-0.0788891	-0.078716	-0.0554939	0.311278	-0.275591	-0.20712	-0.0736788
FBgn0262887	FBgn0038034	CR43242	Cyp9f3	0.50981	0.586561	0.0342378	-0.0243917	0.124891	-0.164078	0.44028	0.0309912	0.249296	0.597883	-0.0389311	0.0922906
FBgn0262887	FBgn0022702	CR43242	Cht2	-0.148196	-0.307461	-0.525376	-0.342319	-0.303249	0.296667	-0.100401	-0.37992	-0.315547	-0.262187	-0.126697	0.0790575
FBgn0262887	FBgn0032470	CR43242	CG5142	0.0764065	0.47151	0.0703007	-0.309539	0.147122	-0.268298	0.0512251	0.0096474	0.116879	0.438829	-0.222232	-0.113208
FBgn0262887	FBgn0069973	CR43242	CG40485	0.198945	-0.0772536	0.160937	0.211853	0.306286	-0.0218496	-0.0151114	-0.141125	0.399727	0.0394434	0.134893	0.115513
FBgn0262887	FBgn0031141	CR43242	CG1304	-0.0581905	-0.0583801	-0.251951	-0.0522852	0.0543424	-0.210819	-0.384615	-0.0891698	-0.0504568	-0.276103	-0.26136	-0.230769
FBgn0262887	FBgn0013771	CR43242	Cyp6a9	0.556098	0.346893	0.328667	-0.00350439	0.0380752	-0.106836	0.494493	0.403142	0.242978	0.29241	0.136771	0.191924
FBgn0262887	FBgn0031935	CR43242	CG13793	0.421703	0.478412	0.476206	0.177184	0.337628	-0.0401282	0.351661	0.432682	0.465466	0.361991	0.249381	0.210108
FBgn0262887	FBgn0029906	CR43242	xit	0.131152	-0.325939	0.0509984	0.00220947	0.327352	0.146954	0.186118	0.0559208	0.256553	-0.263895	0.10134	0.0747887
FBgn0262887	FBgn0035227	CR43242	Iml1	-0.134625	-0.252823	0.39567	0.355396	0.46452	0.298753	-0.331427	0.249466	0.0438829	-0.347733	0.112098	0.2481
FBgn0262887	FBgn0040725	CR43242	CG13946	0.419865	0.644091	0.267565	0.113389	-0.108013	0.130665	0.506813	0.110884	-0.229708	0.695979	0.211389	0.256638
FBgn0262887	FBgn0260874	CR43242	Ir76a	-0.449556	-0.696434	-0.296801	-0.0990849	0.369888	0.241334	-0.511227	-0.298045	0.260565	-0.573465	-0.0431145	0.221549
FBgn0262887	FBgn0031307	CR43242	MFS3	-0.114476	0.0366528	0.429223	0.00647431	0.461009	0.541477	-0.0872535	0.29813	0.326731	0.0642022	0.0145138	0.291898
FBgn0262887	FBgn0259748	CR43242	CG42397	0.368206	0.159853	0.13259	-0.0729333	0.439853	0.123434	0.22061	0.0609579	0.312559	0.255357	-0.163835	0.0777768
FBgn0262887	FBgn0040554	CR43242	CR17025	0.520717	0.121469	-0.209813	-0.617526	0.109561	-0.17754	0.36643	-0.129429	0.311278	0.180398	-0.336208	0.18202
FBgn0262887	FBgn0034494	CR43242	CG10444	0.285052	-0.0152839	0.0266432	-0.0214396	-0.0635146	-0.0349674	0.294118	0.0723982	-0.246051	0.17741	0.0340647	-0.0760693
FBgn0262887	FBgn0015568	CR43242	alpha-Est1	0.452599	-0.0187852	0.0137248	0.0437675	0.656591	0.543999	0.370955	-0.181081	0.536839	0.0519935	0.0466149	0.38009
FBgn0262887	FBgn0260720	CR43242	CR42547	0.623526	0.454448	0.281723	0.210857	0.490051	-0.0313731	0.343379	0.0863144	0.418424	0.505336	0.0406386	-0.0634338
FBgn0262887	FBgn0035666	CR43242	Jon65Aii	0.488665	0.571743	0.265829	0.117604	0.398392	0.209114	0.204218	0.202169	0.253394	0.492359	0.0128063	0.124136
FBgn0262887	FBgn0031735	CR43242	CG11029	-0.233016	-0.188672	0.0614362	0.30114	0.287649	0.0258406	-0.290532	-0.0863144	0.25476	-0.118415	0.245027	0.108853
FBgn0262887	FBgn0036483	CR43242	CG12316	-0.0631333	-0.295191	0.264436	0.425203	-0.443184	0.207051	0.0445659	0.21378	-0.495432	-0.22744	0.286007	-0.0191241
FBgn0262887	FBgn0032147	CR43242	IP3K1	0.091948	-0.266483	0.145144	0.213869	0.194433	0.0586406	0.134978	-0.0256126	0.0547255	-0.328182	0.0370528	-0.093059
FBgn0262887	FBgn0035667	CR43242	Jon65Ai	0.300338	0.109322	-0.0285353	-0.0654931	0.34436	0.0307129	0.119184	-0.155212	0.269956	0.0829847	-0.210791	-0.000426876
FBgn0262887	FBgn0029603	CR43242	CG14053	0.590228	-0.464548	0.289189	-0.331213	0.153759	-0.322256	0.724153	0.35038	0.460343	-0.268249	-0.270298	0.0562623
FBgn0262887	FBgn0002869	CR43242	MtnB	0.0953662	0.680284	0.251388	0.358576	0.410954	-0.0243852	0.271066	0.228123	0.288995	0.558183	0.432938	-0.0583967
FBgn0262887	FBgn0033451	CR43242	CG1665	0.352939	0.12038	-0.18786	-0.206228	0.0737614	0.219506	0.147699	-0.224366	0.112781	-0.000853752	-0.186545	0.300692
FBgn0262887	FBgn0033205	CR43242	CG2064	-0.400594	-0.374357	-0.369331	-0.48077	-0.537508	-0.714831	-0.533254	-0.499872	-0.412192	-0.518313	-0.401007	-0.533424
FBgn0262887	FBgn0051097	CR43242	CG31097	0.106727	0.072215	0.386797	0.613218	0.195888	-0.0409413	-0.133271	0.323401	0.25715	-0.100828	0.338001	0.0601895
FBgn0262887	FBgn0038674	CR43242	CG14285	0.0667849	-0.19467	-0.0995018	-0.267477	0.315432	-0.186623	0.0384189	-0.224195	0.289507	-0.251772	-0.183386	-0.111073
FBgn0262887	FBgn0264721	CR43242	CR43989	0.131546	0.655532	0.418282	0.365961	0.1649	0.064101	0.297618	0.06258	0.0221122	0.711859	0.163835	0.13088
FBgn0262887	FBgn0051664	CR43242	CG31664	0.0022922	0.335306	0.137784	-0.0209062	0.197221	-0.15295	-0.00580551	0.19107	0.234013	0.455135	0.0446512	0.175446
FBgn0261429	FBgn0030628	CR42646	CG9114	-0.414972	-0.186468	0.180748	-0.0715615	-0.164716	0.166657	-0.41407	0.192009	-0.41074	0.138052	-0.0107573	0.0520789
FBgn0261429	FBgn0035767	CR42646	Cln7	0.56632	0.151279	0.748142	-0.00594101	0.198518	0.11787	0.36293	0.590284	0.241527	0.339367	0.0368821	0.0504568
FBgn0261429	FBgn0030773	CR42646	CG9676	-0.0583399	-0.114287	-0.16497	-0.13036	0.158839	-0.0157768	0.107231	-0.187484	0.22078	-0.173995	-0.0907539	0.181337
FBgn0261429	FBgn0004872	CR42646	piwi	-0.483241	-0.717767	-0.193203	-0.133976	-0.139359	0.193997	-0.459063	-0.118074	-0.287117	-0.115	0.0218561	-0.248271
FBgn0261429	FBgn0031726	CR42646	Cyp6a16	0.4293	-0.235404	0.385029	-0.0140771	-0.112339	-0.265836	0.210877	0.288312	-0.329463	0.0426022	-0.123453	-0.550073
FBgn0261429	FBgn0039612	CR42646	CG14523	0.472665	0.0946269	0.741189	0.13859	-0.0668906	-0.334014	0.269444	0.599163	-0.136771	0.276189	0.0498591	-0.306753
FBgn0261429	FBgn0039525	CR42646	CG5646	0.443767	0.101787	0.438486	-0.412505	0.192899	0.229333	0.289849	0.29924	0.216938	0.253052	-0.147955	0.135064
FBgn0261429	FBgn0263763	CR42646	CG43680	0.0388579	0.202878	0.16817	0.0397949	-0.0618806	-0.200933	0.158798	0.190472	-0.171519	0.0737642	0.1115	-0.132844
FBgn0261429	FBgn0037225	CR42646	TwdlG	0.204805	-0.24578	0.13378	0.224155	0.0951198	0.291627	0.190643	0.248357	0.132502	0.0408094	0.257748	0.420131
FBgn0261429	FBgn0039886	CR42646	CG2003	0.372997	-0.0847609	0.638798	0.269591	-0.157695	-0.316597	0.242466	0.486895	-0.318706	-0.0319303	0.199351	-0.561171
FBgn0261429	FBgn0036787	CR42646	CG4306	0.657848	0.0471637	0.0196462	0.128504	0.0595522	0.147475	0.451037	-0.138991	-0.0132332	-0.0126355	0.180056	0.0262956
FBgn0261429	FBgn0030993	CR42646	Mec2	0.401027	0.145966	0.431453	0.225927	0.153805	0.0873047	0.203364	0.261931	0.132332	0.308802	0.0892171	0.032528
FBgn0261429	FBgn0037230	CR42646	CG9780	0.54318	0.0889584	0.503473	0.0105131	0.0839765	-0.0413075	0.469905	0.363613	0.133868	0.167933	0.00145138	-0.0595919
FBgn0261429	FBgn0050428	CR42646	CG30428	0.66861	0.71676	0.0883233	0.432041	0.402174	0.257915	0.244515	0.128234	0.370785	0.11039	0.502177	0.139165
FBgn0261429	FBgn0267408	CR42646	AOX1	0.407444	0.25049	0.281366	0.150358	-0.016931	0.0605717	0.327243	0.146675	-0.147016	0.29113	0.00503714	0.0784598
FBgn0261429	FBgn0261509	CR42646	haf	0.645635	0.399676	-0.0177557	-0.270395	0.227989	0.239067	0.42201	-0.181935	0.240246	0.403398	-0.328097	0.154871
FBgn0261429	FBgn0262007	CR42646	CG42825	0.378622	0.124725	0.0922556	0.390068	-0.0980725	-0.170301	0.270383	0.0467002	-0.372492	0.128148	0.238624	-0.271835
FBgn0261429	FBgn0030600	CR42646	hiw	0.696078	0.0606109	0.139024	-0.0567342	0.263974	0.441058	0.464612	0.0658243	0.301887	0.0462734	-0.0767523	0.463673
FBgn0261429	FBgn0037000	CR42646	ZnT77C	-0.172288	-0.199042	0.26192	0.0108202	0.0134829	-0.302354	-0.116623	0.299667	0.0241612	-0.0321011	0.0969863	-0.0600188
FBgn0261429	FBgn0040342	CR42646	CG3706	0.176119	-0.172827	0.500459	0.350749	-0.123865	-0.377033	0.129685	0.435926	-0.31973	-0.0960471	0.275506	-0.386067
FBgn0261429	FBgn0030367	CR42646	Cyp311a1	0.567248	0.0273693	0.673881	0.00346037	-0.0112784	-0.115306	0.26398	0.4711	-0.0648852	0.274994	-0.0939981	-0.0688124
FBgn0261429	FBgn0027934	CR42646	alpha-Est4aPsi	0.0690547	-0.400126	0.488423	0.348082	0.0497846	-0.186753	0.299411	0.38231	-0.050286	-0.0203193	0.280287	-0.262443
FBgn0261429	FBgn0035243	CR42646	CG13926	-0.0409029	-0.204007	-0.225393	0.318586	-0.115882	-0.232202	-0.0473832	-0.0472125	-0.403227	0.153249	0.417997	-0.554256
FBgn0261429	FBgn0034817	CR42646	Art7	0.544137	-0.0600177	0.702499	0.348097	-0.115623	0.193116	0.364467	0.535303	-0.295142	0.198071	0.160762	0.10006
FBgn0261429	FBgn0014073	CR42646	Tie	0.637387	0.414151	0.239191	-0.295944	0.113104	-0.0039231	0.353966	0.153249	0.0585674	0.0572014	-0.225647	-0.0982669
FBgn0261429	FBgn0038173	CR42646	Adgf-C	0.58992	0.206523	0.32024	0.0448205	0.177457	0.223642	0.404593	0.241868	0.189618	0.218646	-0.210023	0.272347
FBgn0261429	FBgn0037975	CR42646	CG3397	0.31307	-0.0580944	0.578985	0.430213	0.025795	0.0636684	0.270639	0.305985	-0.00691539	0.102109	0.30718	0.120379
FBgn0261429	FBgn0032399	CR42646	CG6785	0.470057	0.892063	-0.36735	0.0387757	0.506482	0.703568	0.274994	-0.29813	0.625288	0.412448	0.230769	0.741825
FBgn0261429	FBgn0036550	CR42646	CG17026	0.591559	-0.192713	0.825867	0.433674	0.305264	0.252876	0.382225	0.644156	0.357039	-0.25587	0.281055	0.188508
FBgn0261429	FBgn0035670	CR42646	CG10472	0.719215	-0.235136	0.549309	0.245419	0.111054	0.22282	0.543157	0.414155	0.146675	-0.130283	0.0503714	0.132673
FBgn0261429	FBgn0039777	CR42646	Jon99Fii	0.478827	-0.36056	0.420748	0.0434742	0.246875	0.339731	0.2878	0.328695	0.28319	-0.288056	-0.00239051	0.256809
FBgn0261429	FBgn0002962	CR42646	nos	-0.614687	-0.309925	-0.212669	-0.251235	0.000786045	0.16259	-0.531888	-0.144711	-0.127721	-0.207803	0.0986084	-0.566891
FBgn0261429	FBgn0037408	CR42646	NPFR	0.145932	-0.422601	0.374917	0.544375	-0.112743	0.0466461	0.219841	0.403142	-0.161445	-0.0551524	0.373431	0.0385042
FBgn0261429	FBgn0039494	CR42646	grass	0.398469	0.0672503	0.664828	0.518928	0.317745	-0.0260512	0.292922	0.495945	0.469222	0.230598	0.2411	0.157603
FBgn0261429	FBgn0015036	CR42646	Cyp4ae1	0.476152	0.111281	0.54887	0.0721925	0.0322519	0.189071	0.352685	0.428242	-0.0105865	0.191667	-0.0285153	0.230172
FBgn0261429	FBgn0267828	CR42646	Fatp	0.518025	0.0685868	0.808458	0.320134	0.0725553	0.40702	0.263126	0.669598	0.10134	0.326731	0.149151	0.341501
FBgn0261429	FBgn0038034	CR42646	Cyp9f3	0.371457	-0.0360544	0.464434	0.181264	0.07066	-0.0826881	0.14326	0.424656	0.0624947	-0.205071	0.0761547	-0.0792282
FBgn0261429	FBgn0022702	CR42646	Cht2	0.239717	-0.41759	0.493028	0.632097	-0.000812455	0.121472	-0.0525911	0.229232	-0.0146845	0.123453	0.262785	-0.0447366
FBgn0261429	FBgn0032470	CR42646	CG5142	0.665797	0.114468	0.615426	0.530869	0.580556	0.676956	0.600359	0.524289	0.610433	-0.357808	0.442927	0.618373
FBgn0261429	FBgn0069973	CR42646	CG40485	0.203083	-0.148824	0.158075	-0.370368	0.222716	0.130797	0.273286	0.0690686	0.292239	0.0983523	-0.248783	0.18663
FBgn0261429	FBgn0031141	CR42646	CG1304	0.686638	0.267452	0.6589	0.316296	0.72864	0.719405	0.535047	0.532286	0.723299	0.084863	0.406218	0.678989
FBgn0261429	FBgn0013771	CR42646	Cyp6a9	0.166847	-0.0124128	0.205911	-0.108625	-0.285175	-0.388069	0.0544694	0.141125	-0.588065	0.156749	-0.0770085	-0.592504
FBgn0261429	FBgn0031935	CR42646	CG13793	0.710243	0.356368	0.228453	0.0436191	-0.122391	-0.317757	0.366516	0.177324	-0.318535	-0.060531	-0.14215	-0.501836
FBgn0261429	FBgn0029906	CR42646	xit	0.0570804	-0.012981	0.363326	0.237171	0.207424	0.366901	0.0364552	0.325365	0.217536	0.215999	0.0563476	0.284982
FBgn0261429	FBgn0035227	CR42646	Iml1	0.599043	-0.0749538	0.34286	-0.00990685	-0.0443648	-0.0859822	0.323316	0.125928	-0.159396	0.202425	0.106719	-0.0196363
FBgn0261429	FBgn0040725	CR42646	CG13946	-0.188523	0.0491286	0.135535	-0.139879	0.0382639	-0.218928	-0.186721	-0.118094	-0.0498698	-0.336208	-0.203876	-0.1115
FBgn0261429	FBgn0260874	CR42646	Ir76a	0.159071	-0.0709294	0.32511	0.416817	-0.323772	-0.271601	0.16042	0.274567	-0.763681	0.206181	0.315205	-0.432596
FBgn0261429	FBgn0031307	CR42646	MFS3	0.491763	0.389057	0.263085	0.247487	0.12147	-0.118187	0.280714	0.191753	0.154188	0.195082	0.0462734	-0.228464
FBgn0261429	FBgn0259748	CR42646	CG42397	0.599538	-0.378024	0.624974	0.363505	0.210837	0.285174	0.384615	0.366772	0.273884	-0.0753009	0.174848	0.305046
FBgn0261429	FBgn0040554	CR42646	CR17025	0.125648	-0.163526	0.572412	0.625604	-0.160072	-0.0746039	0.0866559	0.353539	-0.340818	0.0149407	0.338513	-0.499787
FBgn0261429	FBgn0034494	CR42646	CG10444	-0.320879	-0.327642	0.210986	0.175656	-0.0474538	0.191729	-0.230172	0.223598	-0.104072	-0.0483224	0.11594	0.0668488
FBgn0261429	FBgn0015568	CR42646	alpha-Est1	0.523147	-0.0826987	0.368056	-0.00384208	-0.298772	-0.41678	0.403313	0.405447	-0.661146	0.0732519	-0.107744	-0.54034
FBgn0261429	FBgn0260720	CR42646	CR42547	0.632778	0.165235	-0.0810676	-0.246676	0.188552	0.555818	0.401007	-0.0559208	0.143174	0.0379066	-0.121318	0.570392
FBgn0261429	FBgn0035666	CR42646	Jon65Aii	0.811007	0.0504604	0.469981	0.0567937	0.393569	0.3618	0.59959	0.337232	0.400068	-0.369419	-0.0707761	0.303765
FBgn0261429	FBgn0031735	CR42646	CG11029	0.490059	0.140044	0.484639	0.024347	0.202528	0.156545	0.19679	0.520874	0.278323	0.135234	-0.0868266	0.095791
FBgn0261429	FBgn0036483	CR42646	CG12316	-0.151961	0.0916155	-0.409393	-0.422249	-0.00194333	0.0638089	-0.349185	-0.479467	-0.0840946	0.325023	-0.292922	-0.25493
FBgn0261429	FBgn0032147	CR42646	IP3K1	0.00400205	0.309973	-0.0339472	-0.0373434	0.235181	0.442079	-0.0834116	-0.126782	0.132758	0.340562	-0.0391019	0.570819
FBgn0261429	FBgn0035667	CR42646	Jon65Ai	0.569053	-0.55079	0.632809	0.302964	0.297272	0.37387	0.277726	0.511824	0.3742	-0.401178	0.174592	0.265005
FBgn0261429	FBgn0029603	CR42646	CG14053	-0.238295	0.161096	0.10843	0.39816	-0.0824662	0.150857	-0.0446512	0.0644583	-0.383079	0.239136	0.393068	0.0615555
FBgn0261429	FBgn0002869	CR42646	MtnB	0.0227614	0.381542	-0.320594	-0.351621	0.0936706	-0.0617941	-0.0779476	-0.34816	0.130966	0.0778622	-0.339025	-0.0471271
FBgn0261429	FBgn0033451	CR42646	CG1665	0.645562	0.218369	0.45006	0.0303198	0.0242174	-0.047772	0.447452	0.437548	-0.0518228	0.424571	0.250491	-0.181764
FBgn0261429	FBgn0033205	CR42646	CG2064	0.531446	0.378699	0.780946	0.855054	0.330693	0.350644	0.396141	0.616153	0.514556	0.455648	0.696662	0.518313
FBgn0261429	FBgn0051097	CR42646	CG31097	0.694581	0.273245	0.236931	-0.178591	0.455265	0.394676	0.633655	0.156407	0.508836	-0.133441	-0.00811065	0.461795
FBgn0261429	FBgn0038674	CR42646	CG14285	0.504223	0.418126	0.628249	0.337626	0.333855	0.514393	0.416631	0.564501	0.472723	0.329804	0.447281	0.605054
FBgn0261429	FBgn0264721	CR42646	CR43989	-0.0718357	0.558748	-0.495272	-0.485754	-0.346129	-0.476814	-0.19107	-0.397422	-0.723555	-0.13993	-0.442414	-0.558781
FBgn0261429	FBgn0051664	CR42646	CG31664	0.123603	-0.00945593	-0.0813005	0.131695	0.0445788	-0.170866	0.119952	-0.054384	-0.0812772	-0.0867412	0.203022	-0.389055
FBgn0030628	FBgn0035767	CG9114	Cln7	0.0374033	0.842267	-0.0746427	0.720129	-0.670445	0.470516	-0.140015	-0.189704	-0.704858	0.592333	0.39358	0.573978
FBgn0030628	FBgn0030773	CG9114	CG9676	-0.22956	-0.243423	-0.382988	0.0706438	-0.463691	-0.268578	-0.396397	-0.426022	-0.533168	-0.395629	-0.00324426	-0.218646
FBgn0030628	FBgn0004872	CG9114	piwi	0.131414	0.284351	-0.228152	0.307555	0.734614	0.784255	0.229745	0.322548	0.698967	-0.323914	0.162384	-0.179117
FBgn0030628	FBgn0031726	CG9114	Cyp6a16	0.122543	0.842185	-0.197206	-0.0718946	-0.18574	0.0408289	-0.114147	-0.208999	-0.177324	0.549646	-0.129087	0.23777
FBgn0030628	FBgn0039612	CG9114	CG14523	0.0765251	0.721577	0.0395897	-0.511286	-0.274532	0.14464	-0.22633	-0.0730812	-0.298984	0.412448	-0.0939127	0.220439
FBgn0030628	FBgn0039525	CG9114	CG5646	0.126946	0.887323	-0.0598236	0.673665	-0.497408	0.460602	-0.19107	-0.189789	-0.626313	0.516008	0.375566	0.487236
FBgn0030628	FBgn0263763	CG9114	CG43680	0.206975	0.183257	0.054485	0.182198	-0.473407	0.101721	0.154529	-0.124306	-0.265944	0.356015	0.116708	0.308205
FBgn0030628	FBgn0037225	CG9114	TwdlG	-0.200325	-0.224756	-0.304627	0.388703	-0.476294	0.180192	-0.259114	-0.404764	-0.40946	-0.249637	0.250491	0.285239
FBgn0030628	FBgn0039886	CG9114	CG2003	-0.104482	0.176079	0.063387	-0.637029	0.295174	-0.0994086	-0.0442244	0.0542133	0.138564	0.0852898	-0.361137	-0.490737
FBgn0030628	FBgn0036787	CG9114	CG4306	-0.351283	-0.255855	-0.232086	-0.256759	0.22647	-0.290305	-0.354734	-0.31401	0.0471271	-0.170665	-0.274823	-0.531375
FBgn0030628	FBgn0030993	CG9114	Mec2	0.191258	0.865841	0.354213	0.638367	-0.556842	0.699165	-0.0134893	-0.0141723	-0.458465	0.65073	0.41518	0.673696
FBgn0030628	FBgn0037230	CG9114	CG9780	0.127039	0.694907	-0.0176494	0.589741	-0.511649	0.748227	-0.13882	0.00392726	-0.467942	0.557159	0.414667	0.581405
FBgn0030628	FBgn0050428	CG9114	CG30428	0.058663	-0.395667	0.641908	-0.304077	-0.102965	-0.338101	-0.0155383	0.420131	-0.196278	-0.0661658	-0.207291	-0.59781
FBgn0030628	FBgn0267408	CG9114	AOX1	0.269864	0.698963	-0.323747	0.615502	-0.336682	0.679765	-0.029796	-0.0636045	-0.209169	0.489627	0.331512	0.601981
FBgn0030628	FBgn0261509	CG9114	haf	-0.120806	0.425273	-0.271844	0.744575	-0.553911	0.704852	-0.120891	-0.300777	-0.531973	0.181678	0.519764	0.346709
FBgn0030628	FBgn0262007	CG9114	CG42825	0.289043	0.721914	0.268172	0.427272	-0.0786208	0.234439	0.0315035	0.0834116	-0.117989	0.566038	0.263297	0.237941
FBgn0030628	FBgn0030600	CG9114	hiw	0.0221169	0.0350025	-0.799106	0.232037	-0.715093	0.228845	-0.238112	-0.558439	-0.732605	-0.147358	0.132588	0.107146
FBgn0030628	FBgn0037000	CG9114	ZnT77C	0.138917	-0.106987	0.0739864	-0.0688486	-0.311814	0.2286	0.199778	0.0542133	-0.267737	-0.116537	0.0630069	0.444976
FBgn0030628	FBgn0040342	CG9114	CG3706	-0.230688	-0.516867	0.07231	-0.331213	-0.228575	-0.102582	-0.189021	-0.0240758	-0.167933	-0.425169	-0.237514	-0.0974131
FBgn0030628	FBgn0030367	CG9114	Cyp311a1	-0.101985	0.771846	-0.130471	0.0324317	-0.411667	0.603074	-0.123453	-0.253906	-0.449501	0.38103	0.12849	0.541877
FBgn0030628	FBgn0027934	CG9114	alpha-Est4aPsi	-0.217629	-0.577852	-0.126524	0.264513	-0.572293	-0.134822	-0.25604	-0.271066	-0.483224	-0.350295	0.293605	0.0514813
FBgn0030628	FBgn0035243	CG9114	CG13926	0.363416	0.420993	0.561784	0.342745	0.279732	0.76333	0.339452	0.433621	0.563818	0.524545	0.287288	0.0785452
FBgn0030628	FBgn0034817	CG9114	Art7	0.00124036	0.924167	0.357283	0.624828	-0.0427622	0.91307	-0.0315035	0.367711	0.0782891	0.761205	0.398019	0.627935
FBgn0030628	FBgn0014073	CG9114	Tie	-0.0902188	0.127534	-0.658457	0.593685	-0.266454	0.10561	-0.209425	-0.490566	-0.408947	-0.0820456	0.342952	0.149748
FBgn0030628	FBgn0038173	CG9114	Adgf-C	-0.159024	0.719953	-0.228645	0.414653	-0.387027	0.500684	-0.328609	-0.121147	-0.405362	0.462051	0.321096	0.260992
FBgn0030628	FBgn0037975	CG9114	CG3397	-0.128357	0.226146	0.482981	0.0580794	0.207887	-0.278451	-0.1296	0.31401	0.137796	0.284641	0.0485785	-0.281994
FBgn0030628	FBgn0032399	CG9114	CG6785	-0.0836095	-0.0915412	-0.00519815	0.423137	-0.406568	0.0534863	-0.134807	-0.15581	-0.534876	-0.0313327	0.230342	-0.131392
FBgn0030628	FBgn0036550	CG9114	CG17026	-0.414924	-0.56053	0.0394823	-0.392847	-0.380613	-0.414584	-0.389909	-0.0629215	-0.501579	-0.404166	-0.373175	-0.577563
FBgn0030628	FBgn0035670	CG9114	CG10472	-0.286393	0.237396	-0.240877	-0.0891143	-0.660513	0.42525	-0.273969	-0.366857	-0.74507	0.14232	0.0332963	0.152395
FBgn0030628	FBgn0039777	CG9114	Jon99Fii	-0.412364	-0.0621219	-0.348358	-0.627855	-0.595233	0.332963	-0.460087	-0.435072	-0.753522	-0.342525	-0.44378	0.0723982
FBgn0030628	FBgn0002962	CG9114	nos	0.384374	0.38345	0.415606	-0.22964	0.774116	0.679206	0.334073	0.648596	0.737044	-0.17758	-0.122087	-0.16392
FBgn0030628	FBgn0037408	CG9114	NPFR	-0.168129	-0.165901	-0.304	0.0438013	-0.334503	0.235291	-0.232306	-0.236831	-0.315035	-0.195765	0.0613848	0.184154
FBgn0030628	FBgn0039494	CG9114	grass	0.0779727	0.669033	0.149126	-0.20945	-0.451537	-0.216462	0.00110988	-0.0536156	-0.548365	0.416375	0.0759839	0.0291983
FBgn0030628	FBgn0015036	CG9114	Cyp4ae1	0.176788	0.483125	-0.383462	-0.102879	-0.477365	0.676261	-0.11833	-0.119867	-0.381286	0.273628	-0.0620678	0.369589
FBgn0030628	FBgn0267828	CG9114	Fatp	-0.161003	0.584132	-0.0558926	-0.253486	-0.411442	0.271904	-0.175958	-0.103987	-0.396568	0.0614702	0.000597627	0.0776061
FBgn0030628	FBgn0038034	CG9114	Cyp9f3	-0.377499	-0.245725	-0.0360051	-0.412468	-0.0336969	-0.418705	-0.328012	0.0111842	-0.14898	-0.280372	-0.389909	-0.419448
FBgn0030628	FBgn0022702	CG9114	Cht2	0.0636087	0.704317	0.746432	-0.128164	0.455305	0.891835	0.351746	0.742167	0.380261	0.503202	0.128917	0.247417
FBgn0030628	FBgn0032470	CG9114	CG5142	-0.536544	-0.38002	4.47035e-05	-0.252571	-0.604594	-0.0105003	-0.369248	-0.252284	-0.646376	-0.128917	-0.120208	-0.286861
FBgn0030628	FBgn0069973	CG9114	CG40485	-0.0605007	-0.245351	-0.0437879	0.256384	-0.460284	-0.427318	-0.21728	-0.257577	-0.638009	-0.246478	0.20029	-0.415436
FBgn0030628	FBgn0031141	CG9114	CG1304	-0.056338	0.0816973	0.243894	-0.431834	-0.494082	0.278635	-0.0687271	0.162368	-0.620422	0.291983	-0.461736	0.0224537
FBgn0030628	FBgn0013771	CG9114	Cyp6a9	-0.239523	0.352206	-0.44741	-0.171383	0.377536	-0.334761	-0.148809	-0.31401	0.320755	0.0459319	-0.395714	-0.180142
FBgn0030628	FBgn0031935	CG9114	CG13793	-0.446196	-0.119077	-0.63012	-0.189983	0.0344171	-0.45425	-0.344148	-0.520106	-0.044139	0.0931444	-0.230342	-0.396141
FBgn0030628	FBgn0029906	CG9114	xit	0.0658699	0.857445	0.0128463	-0.00675918	-0.338329	0.650977	0.0904977	0.157944	-0.255955	0.678904	0.0802527	0.402544
FBgn0030628	FBgn0035227	CG9114	Iml1	0.154867	0.747746	-0.439858	0.580461	-0.150835	0.617492	0.112781	-0.0514813	-0.0205754	0.523521	0.429181	0.589516
FBgn0030628	FBgn0040725	CG9114	CG13946	0.157103	-0.109571	0.0333385	-0.234647	0.291057	-0.193065	-0.0128209	-0.116497	0.154477	-0.253223	-0.245539	0.0994621
FBgn0030628	FBgn0260874	CG9114	Ir76a	0.228202	0.17821	0.275947	0.354118	0.246826	0.18676	0.155981	-0.112354	0.331768	0.0849483	0.245795	0.325877
FBgn0030628	FBgn0031307	CG9114	MFS3	0.0534908	0.388254	-0.436278	-0.235253	-0.593162	0.324142	-0.26731	-0.472637	-0.660633	0.164774	-0.0485785	0.248271
FBgn0030628	FBgn0259748	CG9114	CG42397	-0.427878	-0.00689702	-0.196329	-0.421855	-0.570697	0.256488	-0.365321	-0.286946	-0.646205	-0.15359	-0.243405	0.104414
FBgn0030628	FBgn0040554	CG9114	CR17025	-0.230345	-0.309256	-0.0836725	-0.488878	0.320656	-0.30528	-0.248698	-0.200034	0.188765	-0.427047	-0.214804	-0.404593
FBgn0030628	FBgn0034494	CG9114	CG10444	0.111192	0.111427	-0.0207932	-0.469359	0.540579	0.706913	0.181166	0.181252	0.451379	-0.104329	-0.322206	0.00683002
FBgn0030628	FBgn0015568	CG9114	alpha-Est1	-0.233637	0.607279	-0.00984333	0.128996	0.128487	0.467146	-0.234696	-0.0171604	0.133271	0.41407	0.156749	0.29702
FBgn0030628	FBgn0260720	CG9114	CR42547	-0.57161	-0.337229	-0.13991	0.522138	-0.644404	0.366444	-0.460172	-0.336549	-0.636302	-0.340733	0.412021	0.0724836
FBgn0030628	FBgn0035666	CG9114	Jon65Aii	-0.496955	-0.37143	-0.325748	-0.606367	-0.673096	0.322233	-0.529156	-0.319389	-0.748485	-0.17297	-0.381798	0.168275
FBgn0030628	FBgn0031735	CG9114	CG11029	0.0771636	0.859315	-0.102715	0.431668	-0.568441	0.500348	-0.148041	-0.173397	-0.651242	0.529753	0.266541	0.563647
FBgn0030628	FBgn0036483	CG9114	CG12316	0.329391	0.749761	-0.322241	0.659404	0.495157	0.907129	0.384189	0.0954495	0.574148	0.307607	0.325706	0.371041
FBgn0030628	FBgn0032147	CG9114	IP3K1	0.401972	0.0144195	-0.0622365	0.536205	-0.0716422	0.343618	0.196705	0.00700077	-0.00674464	0.029113	0.522752	0.343806
FBgn0030628	FBgn0035667	CG9114	Jon65Ai	-0.31671	-0.192563	0.030933	-0.412512	-0.624271	0.317503	-0.278409	-0.142662	-0.673781	-0.105609	-0.411509	0.18313
FBgn0030628	FBgn0029603	CG9114	CG14053	-0.226026	-0.158967	-0.516988	-0.0297749	0.15286	-0.769246	-0.287971	-0.249637	0.16836	0.00700077	-0.0702638	-0.552463
FBgn0030628	FBgn0002869	CG9114	MtnB	-0.0597388	-0.184066	0.0166562	0.596204	-0.414535	0.150906	0.0175019	-0.219927	-0.341416	-0.169299	0.260565	-0.0784598
FBgn0030628	FBgn0033451	CG9114	CG1665	-0.0789678	0.254379	0.306275	-0.472146	0.311551	0.0876705	-0.097157	0.368479	0.301972	0.125075	-0.48809	-0.244173
FBgn0030628	FBgn0033205	CG9114	CG2064	0.0605658	0.439975	0.516598	-0.241336	0.152746	0.156899	0.0563476	0.450013	0.0209169	0.493469	-0.0824725	0.146931
FBgn0030628	FBgn0051097	CG9114	CG31097	-0.18806	-0.228867	-0.286868	-0.253463	-0.611902	-0.195003	-0.312388	-0.45727	-0.675233	0.00845215	-0.237685	-0.223512
FBgn0030628	FBgn0038674	CG9114	CG14285	-0.138254	0.126269	0.228321	0.0651606	-0.536364	-0.0480964	-0.295654	-0.0113549	-0.576027	0.180056	0.20695	-0.28447
FBgn0030628	FBgn0264721	CG9114	CR43989	0.0776941	-0.383543	-0.177549	0.120003	0.510335	-0.0831739	0.123367	0.0253564	0.471698	-0.374883	-0.0968155	-0.19918
FBgn0030628	FBgn0051664	CG9114	CG31664	-0.167348	-0.0647109	-0.119349	-0.286549	0.220167	-0.270127	-0.13088	0.109366	0.16042	-0.018441	-0.240929	-0.0901562
FBgn0035767	FBgn0030773	Cln7	CG9676	0.159741	-0.300954	0.3981	0.190166	0.680159	-0.694127	0.191497	0.328609	0.613848	-0.322462	0.150773	-0.184581
FBgn0035767	FBgn0004872	Cln7	piwi	-0.545661	-0.0869497	-0.560548	-0.0452394	-0.704185	-0.0387742	-0.513361	-0.392214	-0.675062	-0.333134	-0.106463	-0.187996
FBgn0035767	FBgn0031726	Cln7	Cyp6a16	0.921723	0.837457	0.466319	0.214738	0.649293	0.287867	0.768292	0.397336	0.46299	0.637411	0.375224	0.431572
FBgn0035767	FBgn0039612	Cln7	CG14523	0.936001	0.903088	0.769847	0.425897	0.792408	0.151633	0.79399	0.599078	0.694357	0.617263	0.438573	0.462819
FBgn0035767	FBgn0039525	Cln7	CG5646	0.934608	0.946487	0.844819	0.779121	0.907854	0.889954	0.811321	0.73141	0.786135	0.768121	0.575514	0.72458
FBgn0035767	FBgn0263763	Cln7	CG43680	0.424237	0.225523	0.24829	-0.108196	0.568714	0.30948	0.446854	0.244685	0.308119	0.485102	0.0406386	0.173226
FBgn0035767	FBgn0037225	Cln7	TwdlG	0.290093	-0.0732166	0.278318	-0.0735397	0.417779	0.377584	0.374883	0.387347	0.266798	0.0670196	0.0380774	0.144284
FBgn0035767	FBgn0039886	Cln7	CG2003	0.248033	0.0286699	0.775768	-0.221453	0.0164208	-0.440623	0.104329	0.497652	0.249296	0.0372236	0.0664219	-0.11483
FBgn0035767	FBgn0036787	Cln7	CG4306	0.384307	-0.102419	0.556447	0.575178	0.109007	-0.688426	0.105609	0.217451	0.258516	-0.168018	0.310254	-0.104072
FBgn0035767	FBgn0030993	Cln7	Mec2	0.960734	0.958214	0.612847	0.823093	0.839657	0.862086	0.800649	0.617946	0.619568	0.866388	0.721762	0.748399
FBgn0035767	FBgn0037230	Cln7	CG9780	0.895595	0.857878	0.632141	0.727446	0.820917	0.63929	0.62563	0.529668	0.680184	0.679758	0.549987	0.569282
FBgn0035767	FBgn0050428	Cln7	CG30428	-0.00986112	0.0678402	-0.0190367	0.0921865	0.3713	-0.457087	0.0269786	0.136088	0.199778	0.126355	0.05575	-0.279226
FBgn0035767	FBgn0267408	Cln7	AOX1	0.871142	0.895358	0.486423	0.714164	0.703705	0.775553	0.563818	0.327329	0.412021	0.687441	0.445744	0.601725
FBgn0035767	FBgn0261509	Cln7	haf	0.747758	0.645492	0.18027	0.248642	0.681047	0.544851	0.658328	-0.0405532	0.414411	0.346794	0.0135747	0.090327
FBgn0035767	FBgn0262007	Cln7	CG42825	0.771185	0.881149	-0.0810689	0.546277	0.571473	0.404374	0.606676	0.247674	0.42884	0.722787	0.430633	0.450184
FBgn0035767	FBgn0030600	Cln7	hiw	0.897638	0.229328	0.586625	0.534098	0.90024	0.400073	0.60975	0.421839	0.771024	0.079399	0.379066	0.327585
FBgn0035767	FBgn0037000	Cln7	ZnT77C	0.0706173	0.0215991	0.262011	-0.15947	0.302098	0.416645	0.204218	0.329292	0.222829	0.168275	0.0939127	0.263724
FBgn0035767	FBgn0040342	Cln7	CG3706	0.218053	-0.373849	0.60457	0.108288	0.5133	-0.115929	0.144796	0.454965	0.479809	-0.146419	0.189874	0.0718006
FBgn0035767	FBgn0030367	Cln7	Cyp311a1	0.939814	0.88971	0.825195	0.697778	0.863941	0.495058	0.714078	0.713566	0.721762	0.662682	0.603176	0.566635
FBgn0035767	FBgn0027934	Cln7	alpha-Est4aPsi	0.177403	-0.47462	0.580551	0.332988	0.817269	0.299691	0.240075	0.476821	0.59387	-0.100828	0.307692	0.140869
FBgn0035767	FBgn0035243	Cln7	CG13926	0.518268	0.251441	-0.293285	0.212301	-0.140135	-0.0509538	0.438402	-0.221634	-0.425937	0.52096	0.194485	-0.115086
FBgn0035767	FBgn0034817	Cln7	Art7	0.852021	0.945325	0.715624	0.77462	0.473019	0.756474	0.714676	0.413131	0.333646	0.755144	0.655767	0.665158
FBgn0035767	FBgn0014073	Cln7	Tie	0.143614	0.165948	0.566002	0.101252	0.768122	0.395519	-0.0580552	0.46427	0.527448	-0.086229	0.0652267	-0.00230513
FBgn0035767	FBgn0038173	Cln7	Adgf-C	0.863068	0.945189	0.765332	0.665589	0.886165	0.863156	0.608298	0.52668	0.734056	0.686673	0.464185	0.397422
FBgn0035767	FBgn0037975	Cln7	CG3397	0.350461	0.481921	0.759615	0.691207	0.0318561	-0.673047	0.265261	0.373773	0.219841	0.503543	0.486297	0.095791
FBgn0035767	FBgn0032399	Cln7	CG6785	-0.169746	0.0557073	-0.124966	0.156099	0.296174	0.142734	-0.0961325	-0.00350038	0.245625	0.0759839	0.033211	0.0454196
FBgn0035767	FBgn0036550	Cln7	CG17026	0.507324	-0.551659	0.877961	0.0183845	0.674547	-0.552332	0.299155	0.630581	0.603347	-0.31734	0.0858875	-0.118842
FBgn0035767	FBgn0035670	Cln7	CG10472	0.871914	0.304735	0.835185	0.275681	0.91914	0.524605	0.802698	0.659865	0.823017	0.380005	0.268932	0.306582
FBgn0035767	FBgn0039777	Cln7	Jon99Fii	0.421769	-0.343179	0.731297	-0.0902293	0.848133	0.364312	0.207547	0.562452	0.552975	-0.344745	0.00939127	0.10134
FBgn0035767	FBgn0002962	Cln7	nos	-0.677172	-0.022625	-0.53066	-0.263067	-0.794811	-0.0389293	-0.661573	-0.358832	-0.757022	-0.252284	-0.111244	-0.223854
FBgn0035767	FBgn0037408	Cln7	NPFR	0.58702	-0.112476	0.339634	0.15521	0.650655	0.261884	0.582088	0.354734	0.37437	-0.0250149	0.16725	0.188508
FBgn0035767	FBgn0039494	Cln7	grass	0.843624	0.794439	0.812662	0.472216	0.816489	0.22608	0.77939	0.721677	0.699223	0.657731	0.511654	0.45394
FBgn0035767	FBgn0015036	Cln7	Cyp4ae1	0.927186	0.672064	0.767428	0.425839	0.916544	0.758221	0.685136	0.551524	0.714761	0.419278	0.246222	0.594468
FBgn0035767	FBgn0267828	Cln7	Fatp	0.926466	0.848312	0.872021	0.694115	0.855152	0.542464	0.834714	0.76112	0.797746	0.495859	0.45855	0.508751
FBgn0035767	FBgn0038034	Cln7	Cyp9f3	0.286474	-0.168876	0.649471	0.174183	0.343064	-0.575913	0.0437121	0.457099	0.44028	-0.251345	0.0879365	0.0145992
FBgn0035767	FBgn0022702	Cln7	Cht2	0.01557	0.505683	0.381416	0.682665	-0.647232	0.211862	-0.00367113	-0.000512251	-0.493725	0.576197	0.697089	0.369162
FBgn0035767	FBgn0032470	Cln7	CG5142	0.476677	-0.222225	0.816451	0.0702011	0.706229	-0.131593	0.32306	0.650303	0.644156	-0.0946811	0.0540425	-0.00725689
FBgn0035767	FBgn0069973	Cln7	CG40485	0.259663	-0.239878	0.515847	0.189626	0.814255	0.125594	0.380347	0.291727	0.725092	0.00742764	-0.0729958	0.159396
FBgn0035767	FBgn0031141	Cln7	CG1304	0.555788	0.308078	0.456748	-0.0930688	0.483312	0.174273	0.448988	0.485993	0.433535	0.475113	0.0992484	0.0692393
FBgn0035767	FBgn0013771	Cln7	Cyp6a9	0.361675	0.0911239	0.348587	0.160735	-0.00566334	-0.211241	0.108512	0.335952	0.0850337	-0.0647144	-0.00819602	-0.0197217
FBgn0035767	FBgn0031935	Cln7	CG13793	0.543984	-0.0398604	0.48516	-0.0477217	0.23862	-0.483805	0.249723	0.310766	0.318279	0.0369675	0.0089644	-0.138393
FBgn0035767	FBgn0029906	Cln7	xit	0.34315	0.948406	0.435912	0.724693	0.835576	0.677108	0.253564	0.284812	0.494152	0.758303	0.520277	0.617263
FBgn0035767	FBgn0035227	Cln7	Iml1	0.93032	0.739302	0.464647	0.555833	0.620229	0.475817	0.748741	0.283702	0.293947	0.710919	0.401178	0.441988
FBgn0035767	FBgn0040725	Cln7	CG13946	-0.356056	-0.0820402	0.469671	0.18492	-0.146675	0.0378602	-0.610757	0.13694	0.04829	-0.440109	0.099889	0.115427
FBgn0035767	FBgn0260874	Cln7	Ir76a	0.568923	0.268252	0.461891	-0.0100549	0.0318834	0.48664	0.478016	0.270213	-0.234611	0.281653	-0.015026	0.206864
FBgn0035767	FBgn0031307	Cln7	MFS3	0.83051	0.530852	0.650364	0.196529	0.856485	0.65178	0.650815	0.470247	0.693076	0.457611	0.307265	0.415521
FBgn0035767	FBgn0259748	Cln7	CG42397	0.748902	0.0366543	0.72182	0.346805	0.887651	0.579436	0.559976	0.551182	0.690942	-0.010928	0.336293	0.435584
FBgn0035767	FBgn0040554	Cln7	CR17025	-0.129995	-0.137998	0.633641	-0.127918	-0.0342891	-0.440589	-0.090327	0.322291	0.0842653	-0.138222	0.0934005	-0.203193
FBgn0035767	FBgn0034494	Cln7	CG10444	-0.261419	0.0774104	0.0304729	-0.126498	-0.455957	-0.153962	-0.227525	0.0121233	-0.445573	-0.0476394	0.0529326	-0.134893
FBgn0035767	FBgn0015568	Cln7	alpha-Est1	0.682289	0.742061	0.777925	0.531146	0.32024	0.253966	0.429864	0.548621	0.264236	0.471783	0.42884	0.415265
FBgn0035767	FBgn0260720	Cln7	CR42547	0.358614	-0.274898	0.280232	-0.028064	0.824084	0.374057	0.14104	0.170153	0.62802	-0.41535	-0.0641168	0.116623
FBgn0035767	FBgn0035666	Cln7	Jon65Aii	0.387435	-0.512734	0.653859	-0.132599	0.757122	0.516375	0.200034	0.439853	0.567318	-0.271749	0.00947665	0.246734
FBgn0035767	FBgn0031735	Cln7	CG11029	0.922016	0.931094	0.819758	0.769714	0.895442	0.893403	0.729617	0.739691	0.784428	0.634679	0.545633	0.731153
FBgn0035767	FBgn0036483	Cln7	CG12316	-0.302498	0.425578	-0.519229	0.301576	-0.675961	0.127712	-0.551951	-0.559037	-0.723897	0.0723128	-0.100999	-0.11722
FBgn0035767	FBgn0032147	Cln7	IP3K1	-0.266316	0.308082	0.257062	0.0748933	0.209463	0.310445	-0.42773	0.00802527	0.0776915	0.296679	0.0261248	0.260821
FBgn0035767	FBgn0035667	Cln7	Jon65Ai	0.738379	-0.247273	0.692337	0.352956	0.886427	0.584413	0.575771	0.465893	0.664219	-0.0433706	0.177495	0.434048
FBgn0035767	FBgn0029603	Cln7	CG14053	-0.135505	0.0894642	0.305262	-0.00908577	0.0451552	-0.414221	-0.274481	0.0713737	0.112781	0.208401	-0.0776915	-0.154017
FBgn0035767	FBgn0002869	Cln7	MtnB	-0.293454	-0.156231	-0.0743035	0.0102771	0.292235	-0.164856	-0.359771	-0.100999	0.237087	-0.205242	-0.104072	-0.284982
FBgn0035767	FBgn0033451	Cln7	CG1665	0.439528	0.161029	0.625865	-0.0301968	0.0779114	-0.261371	0.306326	0.338684	0.0437975	0.112098	0.0521643	-0.0172458
FBgn0035767	FBgn0033205	Cln7	CG2064	0.732434	0.729751	0.653987	0.138145	0.273569	0.415517	0.686502	0.525655	0.242978	0.674806	0.283104	0.430547
FBgn0035767	FBgn0051097	Cln7	CG31097	0.537087	-0.0529055	0.737851	-0.066629	0.755822	0.0647974	0.418851	0.491164	0.634679	-0.0636045	-0.184496	0.0275762
FBgn0035767	FBgn0038674	Cln7	CG14285	0.528637	0.332883	0.727151	-0.0863394	0.699302	0.15842	0.517374	0.628276	0.659097	0.390506	0.125075	0.153334
FBgn0035767	FBgn0264721	Cln7	CR43989	-0.228712	-0.21372	-0.440906	-0.330289	-0.256217	-0.37225	-0.411509	-0.258687	-0.277128	-0.290617	-0.329121	-0.1547
FBgn0035767	FBgn0051664	Cln7	CG31664	0.15758	-0.00810183	-0.15912	0.168236	0.118085	-0.539978	-0.0617263	-0.0324426	0.229915	0.046188	0.109366	0.0252711
FBgn0030773	FBgn0004872	CG9676	piwi	0.248522	0.327907	-0.0851782	0.0870193	-0.681195	0.0691546	0.0914369	-0.296081	-0.703492	0.603517	-0.0744472	0.0093059
FBgn0030773	FBgn0031726	CG9676	Cyp6a16	0.226038	-0.140262	0.255871	0.199517	0.495209	-0.423294	0.125416	0.32434	0.336122	-0.0654828	0.40169	-0.11833
FBgn0030773	FBgn0039612	CG9676	CG14523	0.109134	-0.32481	0.176328	0.109819	0.533585	-0.175954	0.101853	0.136856	0.429267	-0.235209	0.136515	-0.014343
FBgn0030773	FBgn0039525	CG9676	CG5646	-0.0661343	-0.256254	0.555625	0.536551	0.665931	-0.741834	0.143004	0.487236	0.607957	-0.139674	0.225647	-0.182874
FBgn0030773	FBgn0263763	CG9676	CG43680	0.11777	-0.554515	-0.234806	-0.332194	0.23444	-0.32052	-0.0317596	-0.156578	0.160762	-0.43695	-0.242551	-0.188679
FBgn0030773	FBgn0037225	CG9676	TwdlG	0.627874	0.371176	0.297557	0.240322	0.0872264	0.0530951	0.606591	0.15359	0.0899001	0.416033	0.0829847	0.0256126
FBgn0030773	FBgn0039886	CG9676	CG2003	0.111103	0.149426	0.217643	-0.205408	0.25795	-0.0488993	0.20584	0.222829	0.341074	0.218731	-0.0289422	0.060531
FBgn0030773	FBgn0036787	CG9676	CG4306	0.14744	0.0738124	0.545266	0.0746729	0.298691	0.435593	0.0175019	0.297789	0.372748	0.136686	0.0799112	0.337147
FBgn0030773	FBgn0030993	CG9676	Mec2	-0.0405282	-0.388829	-0.152291	0.290461	0.325399	-0.645147	-0.0198071	0.209682	0.296423	-0.451123	0.11261	-0.189704
FBgn0030773	FBgn0037230	CG9676	CG9780	-0.0779743	-0.473186	-0.197092	0.131627	0.247421	-0.397971	-0.243917	0.0890464	0.271749	-0.329975	0.0688978	-0.0212584
FBgn0030773	FBgn0050428	CG9676	CG30428	-0.355693	-0.392202	-0.305044	-0.387149	0.332576	0.418667	-0.292922	-0.162469	0.306326	-0.218646	-0.277555	0.293654
FBgn0030773	FBgn0267408	CG9676	AOX1	-0.212402	-0.313052	-0.194468	0.322206	-0.0630473	-0.442871	-0.275506	0.0860582	-0.0774353	-0.363272	0.152053	-0.214975
FBgn0030773	FBgn0261509	CG9676	haf	0.0338952	-0.253235	0.0908318	0.255854	0.501071	-0.326183	-0.0645437	0.0254418	0.343379	-0.40152	0.133868	-0.245454
FBgn0030773	FBgn0262007	CG9676	CG42825	-0.24533	-0.499282	-0.464974	-0.211465	0.0360298	-0.27695	-0.272176	-0.0610433	0.0621532	-0.586101	-0.0572014	-0.194656
FBgn0030773	FBgn0030600	CG9676	hiw	-0.130433	0.425182	0.476877	0.600738	0.640092	-0.204546	0.0395287	0.529924	0.561854	0.176214	0.506873	-0.112098
FBgn0030773	FBgn0037000	CG9676	ZnT77C	0.144675	-0.168589	-0.185603	-0.111965	-0.00897437	-0.173295	0.153419	-0.118159	-0.0168189	0.0278323	-0.0519935	-0.306326
FBgn0030773	FBgn0040342	CG9676	CG3706	0.854655	0.36212	0.16024	0.00349764	0.572485	-0.418304	0.732946	0.187569	0.514471	0.424656	0.0529326	-0.117391
FBgn0030773	FBgn0030367	CG9676	Cyp311a1	0.29025	-0.133981	0.354345	0.233738	0.701152	-0.155598	0.365406	0.3094	0.558695	-0.0735081	0.187825	0.0134893
FBgn0030773	FBgn0027934	CG9676	alpha-Est4aPsi	0.519242	0.454773	-0.117737	-0.52718	0.661943	-0.421285	0.531034	-0.0205754	0.545377	0.39597	-0.282592	-0.0880219
FBgn0030773	FBgn0035243	CG9676	CG13926	-0.0132611	-0.488508	-0.161769	-0.0927103	-0.198599	-0.127893	-0.133783	-0.229659	-0.312986	-0.44361	-0.131905	-0.0356868
FBgn0030773	FBgn0034817	CG9676	Art7	0.269316	-0.240346	0.188677	0.345851	0.581721	-0.427308	0.319389	0.122087	0.505848	-0.218475	0.139162	-0.203961
FBgn0030773	FBgn0014073	CG9676	Tie	-0.296222	0.307658	0.681146	0.627663	0.791757	0.024433	-0.323401	0.432852	0.541706	0.176897	0.538718	0.0315888
FBgn0030773	FBgn0038173	CG9676	Adgf-C	0.0882588	-0.183802	0.497194	0.297092	0.682179	-0.588236	0.21378	0.358234	0.457526	-0.22983	0.10245	-0.186374
FBgn0030773	FBgn0037975	CG9676	CG3397	0.377157	-0.406753	0.0422955	-0.148134	0.21236	0.441791	0.338684	0.110476	0.280458	-0.342355	-0.0799966	0.329634
FBgn0030773	FBgn0032399	CG9676	CG6785	0.289769	-0.105836	0.0369097	-0.0706891	0.334855	0.00364659	0.221293	0.0607872	0.328097	-0.0663365	-0.0332963	0.164091
FBgn0030773	FBgn0036550	CG9676	CG17026	0.562607	0.525108	0.0986158	-0.172565	0.758619	0.355908	0.491505	0.145394	0.659524	0.523009	-0.199522	0.389994
FBgn0030773	FBgn0035670	CG9676	CG10472	0.204068	-0.155775	0.47462	-0.103555	0.7577	-0.432869	0.219756	0.305131	0.727909	-0.140869	-0.125331	-0.234953
FBgn0030773	FBgn0039777	CG9676	Jon99Fii	0.672138	0.567168	0.540373	0.208083	0.622035	-0.231791	0.6223	0.346709	0.490566	0.517374	0.152309	-0.178349
FBgn0030773	FBgn0002962	CG9676	nos	-0.0343143	0.344081	-0.201649	0.230079	-0.691099	0.0686317	-0.185776	-0.236148	-0.674635	0.494579	-0.142662	0.0452489
FBgn0030773	FBgn0037408	CG9676	NPFR	0.459968	0.113576	-0.106366	0.0379413	0.351351	0.0138802	0.555878	0.00341501	0.245112	0.0725689	0.0298813	0.0748741
FBgn0030773	FBgn0039494	CG9676	grass	0.0705387	-0.585757	0.202633	0.109112	0.735446	-0.108846	0.119355	0.307436	0.568172	-0.410569	0.0909246	0.0536156
FBgn0030773	FBgn0015036	CG9676	Cyp4ae1	-0.0922446	-0.307441	0.0545031	-0.0351303	0.479339	-0.515376	0.0995475	0.168787	0.314608	-0.304875	-0.0210877	-0.237941
FBgn0030773	FBgn0267828	CG9676	Fatp	0.378434	-0.246393	0.128627	-0.152979	0.757736	-0.440231	0.3812	0.162213	0.590797	-0.0694954	-0.154273	-0.122855
FBgn0030773	FBgn0038034	CG9676	Cyp9f3	0.246913	0.181612	0.211054	-0.195384	0.487233	0.258385	0.255016	0.217963	0.466576	0.214463	-0.00640314	0.258772
FBgn0030773	FBgn0022702	CG9676	Cht2	0.340913	0.0283394	-0.0304762	0.00401043	-0.404129	-0.119152	0.276957	-0.126953	-0.352344	-0.081448	0.0415777	-0.0547255
FBgn0030773	FBgn0032470	CG9676	CG5142	0.339037	0.356933	0.210235	-0.218381	0.666864	0.168709	0.294715	0.218987	0.634936	0.156237	0.00367113	0.277811
FBgn0030773	FBgn0069973	CG9676	CG40485	0.495567	-0.0463545	0.144345	-0.29864	0.801265	-0.189226	0.56211	0.107402	0.734142	0.150687	-0.259455	0.0741057
FBgn0030773	FBgn0031141	CG9676	CG1304	-0.169095	-0.633216	-0.027341	-0.0473197	0.337858	-0.0911392	-0.163323	0.116502	0.279945	-0.559037	-0.188674	-0.0262102
FBgn0030773	FBgn0013771	CG9676	Cyp6a9	0.180799	0.149088	0.194488	0.261637	0.0476389	0.264155	0.217707	0.273115	0.0899001	0.15248	0.393409	0.0877657
FBgn0030773	FBgn0031935	CG9676	CG13793	0.197225	-0.144171	0.394491	0.359181	0.430367	0.486786	0.117391	0.295313	0.445915	-0.0812772	0.438573	0.248271
FBgn0030773	FBgn0029906	CG9676	xit	0.431332	-0.316925	0.109821	0.265938	0.637537	-0.475591	0.433194	0.127209	0.381713	-0.252881	0.244002	-0.153505
FBgn0030773	FBgn0035227	CG9676	Iml1	-0.0600706	-0.51506	0.015603	0.2835	0.0949365	-0.16464	-0.0938274	0.0900709	0.0351746	-0.425766	0.253735	-0.13549
FBgn0030773	FBgn0040725	CG9676	CG13946	0.029033	0.430345	0.294046	0.202809	-0.481714	-0.0115808	0.00955115	0.183301	-0.326886	0.418509	0.390421	0.115427
FBgn0030773	FBgn0260874	CG9676	Ir76a	0.14351	-0.339142	-0.224649	-0.419063	-0.272657	-0.515075	0.0595065	-0.146845	-0.184581	-0.268676	-0.372919	-0.254674
FBgn0030773	FBgn0031307	CG9676	MFS3	-0.0192201	0.0560584	0.548136	0.250261	0.7254	-0.164635	0.176129	0.429694	0.547084	0.059848	0.131905	0.000256126
FBgn0030773	FBgn0259748	CG9676	CG42397	0.491086	0.4662	0.291024	-0.201664	0.765504	-0.482357	0.392385	0.282165	0.615811	0.268932	-0.09784	-0.112951
FBgn0030773	FBgn0040554	CG9676	CR17025	0.612716	0.616765	-0.0467856	-0.478218	0.159342	0.285277	0.525314	-0.0467002	0.289593	0.31512	-0.200546	0.119867
FBgn0030773	FBgn0034494	CG9676	CG10444	0.451113	0.128594	-0.0773482	0.0535171	-0.3602	0.0348552	0.328865	-0.108853	-0.416375	0.295996	0.10117	0.088961
FBgn0030773	FBgn0015568	CG9676	alpha-Est1	0.315468	-0.184412	0.264273	0.0453238	0.213876	-0.404261	0.322291	0.204218	0.208059	-0.0618117	0.0955349	-0.0983523
FBgn0030773	FBgn0260720	CG9676	CR42547	0.427546	0.0980657	0.150242	-0.149429	0.778306	-0.174173	0.360796	0.0741057	0.613848	0.248442	-0.237258	0.0929736
FBgn0030773	FBgn0035666	CG9676	Jon65Aii	0.244104	0.268695	0.399805	0.20801	0.508273	-0.278474	0.174251	0.233245	0.398873	0.0810211	0.145565	-0.105609
FBgn0030773	FBgn0031735	CG9676	CG11029	0.274339	-0.285622	0.340646	0.675629	0.744023	-0.628113	0.264407	0.272262	0.66789	-0.307009	0.368479	-0.0346623
FBgn0030773	FBgn0036483	CG9676	CG12316	-0.483165	-0.29304	-0.0406285	0.202462	-0.686644	-0.0385922	-0.552634	-0.0829847	-0.642961	-0.180142	0.163067	-0.0835823
FBgn0030773	FBgn0032147	CG9676	IP3K1	-0.3757	-0.0411967	0.100412	-0.0742557	0.424572	-0.198708	-0.382737	-0.0157944	0.131819	-0.0286861	-0.240673	-0.040041
FBgn0030773	FBgn0035667	CG9676	Jon65Ai	0.545766	0.0295028	0.191694	0.040397	0.725168	-0.492003	0.463331	0.0987791	0.584223	-0.0477248	-0.0612994	-0.191753
FBgn0030773	FBgn0029603	CG9676	CG14053	0.46811	-0.567463	0.528635	-0.336959	0.386437	0.139402	0.484334	0.282421	0.350551	-0.15709	-0.18996	0.22761
FBgn0030773	FBgn0002869	CG9676	MtnB	-0.0886172	0.420428	0.182107	0.149722	0.787788	0.509025	-0.117562	0.21839	0.395543	0.287544	0.111927	0.0378212
FBgn0030773	FBgn0033451	CG9676	CG1665	0.0893894	-0.227916	0.0733676	-0.0150826	0.330482	0.0145927	0.108	0.0339793	0.202681	0.03526	0.093059	0.0558354
FBgn0030773	FBgn0033205	CG9676	CG2064	-0.108622	-0.525026	-0.16236	-0.262523	0.109417	-0.369957	-0.124477	-0.131051	0.0505421	-0.481602	-0.30479	-0.0472125
FBgn0030773	FBgn0051097	CG9676	CG31097	-0.00518927	-0.267216	0.488089	0.0252731	0.716798	0.102272	0.033211	0.39597	0.623495	-0.280714	0.0559208	0.116708
FBgn0030773	FBgn0038674	CG9676	CG14285	0.447641	-0.504431	0.137523	-0.309239	0.795206	-0.149685	0.505421	0.144967	0.731836	-0.264578	-0.258431	0.151883
FBgn0030773	FBgn0264721	CG9676	CR43989	-0.423828	0.357777	-0.010309	-0.0620048	-0.280564	0.360007	-0.338769	-0.116964	-0.322121	0.349782	-0.120806	0.189448
FBgn0030773	FBgn0051664	CG9676	CG31664	-0.148457	0.0776968	-0.1339	0.306198	0.400938	0.464587	-0.234013	-0.0089644	0.26859	0.135832	0.29019	0.28208
FBgn0004872	FBgn0031726	piwi	Cyp6a16	-0.472357	0.174508	0.370597	0.195203	-0.240002	0.0971126	-0.491847	0.191497	-0.354393	-0.309314	0.205413	0.387945
FBgn0004872	FBgn0039612	piwi	CG14523	-0.384372	0.038376	-0.0468138	-0.148671	-0.294233	-0.0529279	-0.472808	-0.0472979	-0.390592	-0.196448	-0.0139162	0.212157
FBgn0004872	FBgn0039525	piwi	CG5646	-0.648469	-0.0485523	-0.741175	0.262021	-0.700328	-0.028077	-0.517715	-0.495603	-0.686075	-0.392128	0.0815333	-0.321011
FBgn0004872	FBgn0263763	piwi	CG43680	-0.157495	-0.118322	-0.533319	-0.426564	-0.0165051	0.00104642	-0.437719	-0.357722	-0.105182	-0.489456	-0.272005	-0.0497738
FBgn0004872	FBgn0037225	piwi	TwdlG	0.0741893	0.245351	-0.466392	0.56217	-0.0882735	-0.0838943	-0.0928029	-0.405618	-0.176214	0.360369	0.104158	-0.355161
FBgn0004872	FBgn0039886	piwi	CG2003	0.0699919	0.118348	-0.178405	0.0083433	0.108153	0.31861	0.108427	-0.108853	-0.0435414	0.219927	0.00435414	0.54034
FBgn0004872	FBgn0036787	piwi	CG4306	-0.0106447	0.089242	0.0674647	-0.121189	-0.0551691	0.162747	-0.168958	-0.116623	-0.194485	-0.00145138	-0.0220268	0.28097
FBgn0004872	FBgn0030993	piwi	Mec2	-0.579356	-0.0844983	-0.618716	-0.127812	-0.637254	0.142498	-0.522326	-0.342782	-0.496798	-0.410313	-0.128746	-0.3561
FBgn0004872	FBgn0037230	piwi	CG9780	-0.624069	-0.265194	-0.455078	-0.298743	-0.490159	0.218969	-0.591053	-0.352344	-0.506873	-0.518996	-0.141723	-0.268932
FBgn0004872	FBgn0050428	piwi	CG30428	-0.0303333	-0.532134	-0.642713	-0.540113	-0.272361	0.0555243	-0.199949	-0.262273	-0.323316	-0.14676	-0.250747	0.176859
FBgn0004872	FBgn0267408	piwi	AOX1	-0.597863	-0.277713	-0.0850486	-0.124784	-0.299364	0.194014	-0.531546	0.0185264	-0.236148	-0.470588	-0.186289	-0.415777
FBgn0004872	FBgn0261509	piwi	haf	-0.610231	-0.300209	-0.609346	-0.00987727	-0.718929	0.186553	-0.710919	-0.485358	-0.561257	-0.548963	-0.118757	-0.396739
FBgn0004872	FBgn0262007	piwi	CG42825	-0.445134	-0.173609	0.221404	-0.00625246	-0.231411	0.112216	-0.511568	0.141723	-0.256211	-0.49936	-0.202681	0.0656535
FBgn0004872	FBgn0030600	piwi	hiw	-0.732861	-0.144363	-0.0871797	0.172202	-0.687241	-0.0120724	-0.49381	-0.185947	-0.639034	0.0833262	0.167848	-0.471186
FBgn0004872	FBgn0037000	piwi	ZnT77C	0.0814322	0.15199	-0.416896	0.158231	0.0960938	-0.0193113	-0.0251857	-0.130539	-0.0367967	0.187057	0.00904977	-0.225134
FBgn0004872	FBgn0040342	piwi	CG3706	0.260519	0.239372	0.111239	0.126223	-0.134313	0.08552	0.204559	0.136259	-0.30385	0.581149	0.258089	0.261163
FBgn0004872	FBgn0030367	piwi	Cyp311a1	-0.495626	0.0443037	-0.490802	-0.331899	-0.438804	0.207474	-0.33228	-0.395458	-0.470759	-0.167848	-0.205157	0.0149407
FBgn0004872	FBgn0027934	piwi	alpha-Est4aPsi	0.0830181	0.397954	-0.529648	-0.310858	-0.420078	-0.122874	0.00537864	-0.473235	-0.458977	0.415521	-0.061214	0.41185
FBgn0004872	FBgn0035243	piwi	CG13926	-0.281337	0.164047	-0.304796	-0.428585	0.267154	0.715523	-0.387689	-0.116793	0.495518	-0.461453	-0.290617	0.189874
FBgn0004872	FBgn0034817	piwi	Art7	-0.518456	0.103314	-0.199832	0.35329	-0.358402	0.530406	-0.354051	-0.0338086	-0.275164	-0.341928	0.141808	-0.207974
FBgn0004872	FBgn0014073	piwi	Tie	-0.139086	-0.325386	-0.416252	-0.180632	-0.674054	-0.167515	-0.0630069	-0.422437	-0.568428	0.00674464	-0.215146	-0.510117
FBgn0004872	FBgn0038173	piwi	Adgf-C	-0.5655	-0.0989576	-0.621018	0.0782569	-0.679948	0.0162377	-0.377102	-0.354819	-0.485956	-0.359515	-0.0363698	-0.29702
FBgn0004872	FBgn0037975	piwi	CG3397	0.0144024	0.00694978	-0.0824181	-0.62691	-0.0209519	0.106517	0.0125502	0.0346623	-0.108341	-0.334415	-0.268078	0.311193
FBgn0004872	FBgn0032399	piwi	CG6785	-0.0403013	-0.541116	-0.617553	-0.341459	-0.280425	-0.010626	-0.0951934	-0.505336	-0.369333	-0.201059	-0.299752	-0.415948
FBgn0004872	FBgn0036550	piwi	CG17026	-0.12886	0.320802	-0.264416	-0.160248	-0.510725	0.0652209	-0.154615	-0.261846	-0.547511	0.45838	0.0283446	0.319218
FBgn0004872	FBgn0035670	piwi	CG10472	-0.560371	0.0796617	-0.515357	-0.00150735	-0.722788	0.107605	-0.678733	-0.481089	-0.74396	-0.115854	-0.0442244	-0.311961
FBgn0004872	FBgn0039777	piwi	Jon99Fii	-0.21039	0.518535	-0.146684	-0.202418	-0.587579	0.182359	-0.0518228	-0.197644	-0.662597	0.463673	0.0520789	-0.309827
FBgn0004872	FBgn0002962	piwi	nos	0.7789	0.949272	0.792349	0.742779	0.886117	0.96727	0.741911	0.706053	0.823017	0.510373	0.698882	0.627166
FBgn0004872	FBgn0037408	piwi	NPFR	-0.218193	0.424325	-0.140231	-0.0790548	-0.381164	0.0812364	-0.268676	-0.0777768	-0.353539	0.100231	0.143857	-0.140101
FBgn0004872	FBgn0039494	piwi	grass	-0.324871	-0.23156	-0.669971	-0.386099	-0.570616	-0.336903	-0.370102	-0.488688	-0.589089	-0.450781	-0.0560061	-0.0558354
FBgn0004872	FBgn0015036	piwi	Cyp4ae1	-0.588872	-0.217543	-0.00988286	-0.0610272	-0.461952	0.206401	-0.364381	-0.001366	-0.391787	-0.147699	-0.0515666	-0.3094
FBgn0004872	FBgn0267828	piwi	Fatp	-0.300748	0.0432073	-0.0820615	-0.221581	-0.388668	0.01757	-0.308802	-0.106463	-0.405532	0.0474686	0.0843507	-0.152224
FBgn0004872	FBgn0038034	piwi	Cyp9f3	0.14863	0.0790034	0.391271	0.0594803	-0.119264	0.0101479	0.163494	0.193631	-0.244429	0.463417	0.0705199	0.375822
FBgn0004872	FBgn0022702	piwi	Cht2	0.110029	0.590776	-0.24837	-0.511977	0.424481	0.875005	0.209596	0.214377	0.460343	0.119867	-0.0652267	0.142833
FBgn0004872	FBgn0032470	piwi	CG5142	-0.471442	-0.208521	-0.682904	-0.523207	-0.56501	0.0126486	-0.307351	-0.550499	-0.614787	0.0104158	-0.198924	-0.186459
FBgn0004872	FBgn0069973	piwi	CG40485	-0.0280615	0.329647	-0.591682	0.124802	-0.474055	-0.382767	-0.214975	-0.712968	-0.60531	0.399385	0.0220268	-0.16392
FBgn0004872	FBgn0031141	piwi	CG1304	-0.442466	-0.326798	0.252675	-0.096389	-0.321343	0.150066	-0.491847	0.113939	-0.426108	-0.487493	0.017424	-0.411423
FBgn0004872	FBgn0013771	piwi	Cyp6a9	-0.319935	0.169474	0.410458	0.201932	0.231436	-0.0609787	-0.0121233	0.337061	0.152736	0.200205	0.0950226	0.447793
FBgn0004872	FBgn0031935	piwi	CG13793	-0.317619	-0.334307	0.336126	0.362611	-0.143348	-0.0213814	-0.214719	0.250406	-0.194058	-0.191241	0.317084	0.508751
FBgn0004872	FBgn0029906	piwi	xit	0.26278	0.080999	0.446423	0.277011	-0.445231	0.280928	0.243234	0.380517	-0.444805	-0.147016	0.22411	-0.0583113
FBgn0004872	FBgn0035227	piwi	Iml1	-0.642718	-0.0314472	-0.236965	-0.269379	-0.139514	0.188054	-0.501153	0.00179288	-0.063263	-0.521386	-0.0775207	-0.303594
FBgn0004872	FBgn0040725	piwi	CG13946	0.321011	0.104348	0.222833	0.0923412	0.159479	-0.285548	0.416722	0.165687	0.136715	0.311449	0.123453	-0.148638
FBgn0004872	FBgn0260874	piwi	Ir76a	-0.241629	-0.0338727	-0.515843	-0.114434	0.265953	0.0662234	-0.422693	-0.355502	0.240161	-0.321267	0.0823871	-0.0126355
FBgn0004872	FBgn0031307	piwi	MFS3	-0.554909	-0.307463	-0.709283	-0.249565	-0.667638	-0.0431032	-0.425766	-0.590797	-0.571331	-0.0934005	-0.0905831	-0.218646
FBgn0004872	FBgn0259748	piwi	CG42397	-0.17966	0.436915	-0.163116	0.0735445	-0.617905	0.0965348	-0.260053	-0.213182	-0.593529	0.501579	0.0887049	-0.0723982
FBgn0004872	FBgn0040554	piwi	CR17025	0.409545	0.398777	-0.479507	-0.350252	0.160489	0.0658135	0.124136	-0.361052	-0.0297106	0.58354	-0.0487493	0.535644
FBgn0004872	FBgn0034494	piwi	CG10444	0.637453	0.503831	0.795235	0.195705	0.805794	0.710264	0.563733	0.667207	0.605993	0.559037	0.318364	0.363784
FBgn0004872	FBgn0015568	piwi	alpha-Est1	-0.307711	-0.0479599	-0.412761	-0.0581338	-0.00758164	0.306938	0.0338086	-0.273713	-0.130539	-0.114659	0.0309058	0.188594
FBgn0004872	FBgn0260720	piwi	CR42547	-0.0297609	-0.0360791	-0.743563	0.0549601	-0.660363	0.0598447	-0.0298813	-0.666012	-0.576624	0.254504	-0.104072	-0.550329
FBgn0004872	FBgn0035666	piwi	Jon65Aii	-0.352778	-0.0288199	0.0609187	0.209764	-0.657476	0.186961	-0.36754	-0.0147699	-0.62674	-0.0128917	0.203791	-0.226842
FBgn0004872	FBgn0031735	piwi	CG11029	-0.409668	-0.11962	-0.647303	-0.192374	-0.502934	0.0685322	-0.396141	-0.555451	-0.525143	-0.435841	-0.193973	-0.346026
FBgn0004872	FBgn0036483	piwi	CG12316	0.133775	0.0913851	0.0995367	0.0378328	0.536329	0.89055	0.335866	0.289593	0.620593	-0.285409	-0.179203	0.0160505
FBgn0004872	FBgn0032147	piwi	IP3K1	-0.13339	-0.112387	-0.685079	-0.0451124	-0.487427	0.10797	0.14676	-0.524289	-0.287715	-0.165969	-0.176897	-0.599846
FBgn0004872	FBgn0035667	piwi	Jon65Ai	-0.157483	0.360948	0.00109898	-0.124041	-0.695172	0.185842	-0.206181	-0.182874	-0.658243	0.246649	0.0531888	-0.118757
FBgn0004872	FBgn0029603	piwi	CG14053	0.414462	-0.0857237	0.228071	0.333359	0.00925117	-0.302162	0.526424	0.3958	-0.043456	-0.206779	0.178946	0.325963
FBgn0004872	FBgn0002869	piwi	MtnB	0.1283	-0.120612	-0.318589	0.00329522	-0.407355	0.190661	0.288312	-0.310254	-0.20251	0.249979	-0.0225391	0.0742764
FBgn0004872	FBgn0033451	piwi	CG1665	-0.406846	-0.0272259	0.046613	0.0860535	0.111479	0.306326	-0.260565	0.197558	0.0860582	0.107402	0.0617263	0.462563
FBgn0004872	FBgn0033205	piwi	CG2064	-0.348538	-0.141901	-0.190334	-0.199247	0.0343679	-0.00945485	-0.39819	-0.125331	0.0236489	-0.413131	-0.102194	-0.00426876
FBgn0004872	FBgn0051097	piwi	CG31097	-0.476983	-0.373227	-0.682154	-0.232832	-0.543808	-0.145456	-0.601212	-0.499787	-0.565952	-0.488773	-0.10228	-0.227098
FBgn0004872	FBgn0038674	piwi	CG14285	-0.207339	-0.225482	-0.629658	-0.312171	-0.525062	-0.0423532	-0.253138	-0.563647	-0.59037	-0.231623	-0.0525911	-0.196875
FBgn0004872	FBgn0264721	piwi	CR43989	0.174307	-0.369915	0.221575	0.14563	0.484731	0.176142	0.408179	0.207803	0.472637	0.201656	-0.221378	0.287971
FBgn0004872	FBgn0051664	piwi	CG31664	-0.0480287	-0.00396527	0.694771	-0.095823	-0.162592	0.0848989	0.00572014	0.488859	-0.1296	0.0418339	-0.0312473	0.406471
FBgn0031726	FBgn0039612	Cyp6a16	CG14523	0.845255	0.784385	0.658484	0.620788	0.894631	0.48376	0.679245	0.414411	0.739264	0.537437	0.616921	0.509178
FBgn0031726	FBgn0039525	Cyp6a16	CG5646	0.816605	0.859422	0.355075	0.256568	0.568265	0.187837	0.746521	0.395202	0.321865	0.669086	0.372748	0.243234
FBgn0031726	FBgn0263763	Cyp6a16	CG43680	0.435706	0.140202	-0.294666	-0.272733	0.62826	0.212244	0.374456	-0.246734	0.35371	0.243661	-0.280628	0.270469
FBgn0031726	FBgn0037225	Cyp6a16	TwdlG	0.16149	-0.298602	-0.0225736	-0.166692	0.0850916	-0.436354	0.174934	0.0674464	-0.0753863	-0.1296	-0.175361	-0.312217
FBgn0031726	FBgn0039886	Cyp6a16	CG2003	0.237023	0.262032	0.590534	0.394021	0.409359	0.407068	0.201144	0.524289	0.524204	0.289849	0.452659	0.501067
FBgn0031726	FBgn0036787	Cyp6a16	CG4306	0.440154	0.0992604	0.251357	0.293494	0.347375	0.0245436	0.176983	0.228464	0.489115	0.0970716	0.355929	0.101084
FBgn0031726	FBgn0030993	Cyp6a16	Mec2	0.851869	0.783912	0.113893	0.310547	0.366475	0.228498	0.657218	0.201315	0.180227	0.569538	0.3129	0.251857
FBgn0031726	FBgn0037230	Cyp6a16	CG9780	0.809921	0.704992	0.196344	0.253364	0.453236	0.129643	0.530266	0.0795697	0.296423	0.607359	0.268078	0.182703
FBgn0031726	FBgn0050428	Cyp6a16	CG30428	-0.102551	-0.399799	-0.462236	-0.160464	0.113694	-0.286209	-0.095791	-0.348929	0.0169897	-0.221463	-0.243063	-0.173572
FBgn0031726	FBgn0267408	Cyp6a16	AOX1	0.740027	0.695173	0.438845	0.328929	0.335808	0.107933	0.519508	0.238709	0.183386	0.567745	0.33783	0.0898147
FBgn0031726	FBgn0261509	Cyp6a16	haf	0.532165	0.43249	-0.285564	-0.395578	0.0499073	-0.128817	0.457782	-0.444207	-0.0816187	0.186886	-0.389653	-0.249637
FBgn0031726	FBgn0262007	Cyp6a16	CG42825	0.756878	0.647632	0.368346	0.407231	0.793434	0.420596	0.614872	0.134466	0.579015	0.51541	0.21728	0.357381
FBgn0031726	FBgn0030600	Cyp6a16	hiw	0.776698	0.187557	0.399737	0.411277	0.327134	-0.399591	0.532741	0.415863	0.196534	0.0433706	0.55067	-0.43695
FBgn0031726	FBgn0037000	Cyp6a16	ZnT77C	-0.131601	-0.170129	0.0564809	0.00333084	-0.0589234	-0.0410932	-0.0113549	-0.0774353	-0.180398	-0.0576283	0.0801673	0.10817
FBgn0031726	FBgn0040342	Cyp6a16	CG3706	0.150036	-0.3456	0.660562	0.561177	0.809712	0.418487	0.0089644	0.593529	0.610006	-0.205157	0.560659	0.310083
FBgn0031726	FBgn0030367	Cyp6a16	Cyp311a1	0.846204	0.840174	0.375485	0.392121	0.773919	0.400451	0.632204	0.272347	0.557756	0.641168	0.426705	0.40946
FBgn0031726	FBgn0027934	Cyp6a16	alpha-Est4aPsi	0.0194383	-0.486894	-0.105719	-0.0356894	0.649946	0.629251	-0.0181849	-0.15931	0.508324	-0.149321	-0.05575	0.526594
FBgn0031726	FBgn0035243	Cyp6a16	CG13926	0.460871	0.207308	-0.661103	-0.326946	0.335768	0.273212	0.454196	-0.407411	-0.0258687	0.366004	-0.39247	0.341501
FBgn0031726	FBgn0034817	Cyp6a16	Art7	0.685358	0.919669	0.414968	0.303131	0.807305	0.00377284	0.486297	0.325706	0.609835	0.749424	0.301375	0.0788867
FBgn0031726	FBgn0014073	Cyp6a16	Tie	0.251393	0.113932	0.213569	-0.0438958	0.461577	-0.0724556	0.0515666	0.108768	0.149919	0.046871	-0.089644	-0.0809357
FBgn0031726	FBgn0038173	Cyp6a16	Adgf-C	0.730409	0.820807	0.193798	0.428289	0.511163	0.059969	0.617775	0.165286	0.210791	0.647913	0.281141	-0.0919491
FBgn0031726	FBgn0037975	Cyp6a16	CG3397	0.316737	0.333183	0.400667	0.181355	0.300831	0.0112748	0.26159	0.24682	0.414838	0.293435	0.175105	0.174422
FBgn0031726	FBgn0032399	Cyp6a16	CG6785	-0.244395	-0.287718	-0.621964	-0.577275	-0.188589	-0.620829	-0.250576	-0.512934	-0.40724	-0.129429	-0.550158	-0.684026
FBgn0031726	FBgn0036550	Cyp6a16	CG17026	0.449313	-0.223888	0.457682	0.400526	0.440208	0.00893151	0.34688	0.396056	0.451806	-0.0739349	0.294801	0.0108427
FBgn0031726	FBgn0035670	Cyp6a16	CG10472	0.759459	0.491269	0.405146	0.311993	0.567002	-0.183322	0.708956	0.383762	0.37326	0.447366	0.254333	-0.133698
FBgn0031726	FBgn0039777	Cyp6a16	Jon99Fii	0.339851	0.0908285	0.425356	0.517221	0.353179	-0.3195	0.218902	0.533083	0.201998	0.0657389	0.511824	-0.36404
FBgn0031726	FBgn0002962	Cyp6a16	nos	-0.531544	0.197084	0.100346	0.158554	-0.512123	0.106287	-0.575941	-0.0472125	-0.494066	-0.0328695	0.210962	0.467685
FBgn0031726	FBgn0037408	Cyp6a16	NPFR	0.34357	-0.0721073	0.19276	0.516093	0.708021	0.0334301	0.374285	0.186886	0.59387	-0.0883634	0.249381	0.0389311
FBgn0031726	FBgn0039494	Cyp6a16	grass	0.841507	0.703677	0.26584	0.437283	0.266264	-0.0950779	0.700589	0.278494	0.183471	0.59498	0.468454	0.0099889
FBgn0031726	FBgn0015036	Cyp6a16	Cyp4ae1	0.753706	0.457519	0.682522	0.454852	0.696799	0.0391512	0.512422	0.625203	0.490395	0.263041	0.437975	-0.0431145
FBgn0031726	FBgn0267828	Cyp6a16	Fatp	0.794928	0.716662	0.604006	0.0928783	0.805234	-0.180554	0.642107	0.565525	0.595492	0.316571	0.215402	-0.0599334
FBgn0031726	FBgn0038034	Cyp6a16	Cyp9f3	0.221289	-0.211202	0.585816	0.521279	0.459947	0.200755	0.205327	0.609408	0.441902	-0.114317	0.549304	0.250576
FBgn0031726	FBgn0022702	Cyp6a16	Cht2	-0.0643676	0.576239	0.13034	0.362324	-0.598296	-0.011563	-0.166567	-0.0555793	-0.544694	0.416887	0.386323	0.124989
FBgn0031726	FBgn0032470	Cyp6a16	CG5142	0.291141	-0.14433	0.0927086	0.121168	0.156733	-0.510999	0.258004	0.0220268	0.0764108	-0.015709	-0.0659097	-0.38231
FBgn0031726	FBgn0069973	Cyp6a16	CG40485	0.205879	-0.259186	-0.167408	-0.518767	0.472858	-0.393433	0.275079	-0.270469	0.30829	-0.193631	-0.468795	-0.257406
FBgn0031726	FBgn0031141	Cyp6a16	CG1304	0.520143	0.143101	0.540247	0.27144	-0.0217299	-0.571989	0.402373	0.533652	-0.179629	0.26048	0.344807	-0.570563
FBgn0031726	FBgn0013771	Cyp6a16	Cyp6a9	0.275796	0.0734469	0.608371	0.684027	0.385361	0.46267	0.167848	0.732861	0.592504	0.0216853	0.643729	0.638948
FBgn0031726	FBgn0031935	Cyp6a16	CG13793	0.602465	0.132182	0.603668	0.543263	0.615568	0.34317	0.45044	0.601639	0.688039	0.291556	0.664817	0.491505
FBgn0031726	FBgn0029906	Cyp6a16	xit	0.25714	0.914697	0.703373	0.750715	0.503446	-0.00432744	0.223683	0.736447	0.348843	0.705029	0.775378	0.0246734
FBgn0031726	FBgn0035227	Cyp6a16	Iml1	0.839312	0.718119	0.0751295	0.274135	0.395739	0.18907	0.675574	0.0096474	0.0777768	0.597029	0.118159	0.156578
FBgn0031726	FBgn0040725	Cyp6a16	CG13946	-0.231676	-0.0336474	0.472804	0.719132	-0.249796	0.252393	-0.425843	0.321427	-0.211093	-0.10467	0.605908	0.0554939
FBgn0031726	FBgn0260874	Cyp6a16	Ir76a	0.509262	0.00961994	-0.378609	-0.53272	0.424256	0.43768	0.316315	-0.173056	0.3561	-0.054384	-0.461026	0.435584
FBgn0031726	FBgn0031307	Cyp6a16	MFS3	0.632701	0.50965	0.140441	0.494476	0.399837	0.0101889	0.549902	0.112098	0.16725	0.494493	0.412192	0.115769
FBgn0031726	FBgn0259748	Cyp6a16	CG42397	0.636892	0.104748	0.471435	0.422	0.636417	-0.0551378	0.509007	0.402971	0.439768	0.00375651	0.411082	-0.0852045
FBgn0031726	FBgn0040554	Cyp6a16	CR17025	0.104245	-0.211943	-0.0768418	-0.00640652	0.399071	0.337526	0.00307351	-0.10228	0.600529	-0.252711	-0.0643729	0.476052
FBgn0031726	FBgn0034494	Cyp6a16	CG10444	-0.0980265	0.112828	0.525739	0.539031	0.102756	-0.126172	-0.156749	0.526765	-0.118757	0.010928	0.59737	-0.0140869
FBgn0031726	FBgn0015568	Cyp6a16	alpha-Est1	0.537701	0.765229	0.160245	0.508532	0.808708	0.712151	0.369589	0.164006	0.750192	0.592248	0.558781	0.668403
FBgn0031726	FBgn0260720	Cyp6a16	CR42547	0.348286	-0.274535	-0.252146	-0.559191	0.359572	-0.506348	0.125075	-0.332195	0.115513	-0.308888	-0.620763	-0.544011
FBgn0031726	FBgn0035666	Cyp6a16	Jon65Aii	0.413393	-0.0519108	0.624221	0.593856	0.156822	-0.176709	0.278067	0.577905	0.00418339	0.118415	0.574148	-0.29463
FBgn0031726	FBgn0031735	Cyp6a16	CG11029	0.81296	0.885236	0.135785	0.364339	0.518281	0.126991	0.583796	0.173226	0.29924	0.666012	0.430633	0.174934
FBgn0031726	FBgn0036483	Cyp6a16	CG12316	-0.236992	0.436501	-0.324906	-0.352969	-0.747068	-0.00312236	-0.416887	-0.450184	-0.651071	0.0863997	-0.50508	0.0116964
FBgn0031726	FBgn0032147	Cyp6a16	IP3K1	-0.149511	-0.0774393	-0.355292	-0.585279	-0.096349	-0.485262	-0.337147	-0.511995	-0.193119	-0.126099	-0.679758	-0.545462
FBgn0031726	FBgn0035667	Cyp6a16	Jon65Ai	0.573635	0.035859	0.388535	0.381594	0.53208	-0.0420094	0.438829	0.386238	0.332024	0.0581405	0.465466	-0.0989499
FBgn0031726	FBgn0029603	Cyp6a16	CG14053	-0.0427842	-0.0915472	0.624359	0.0342921	0.415003	-0.0729206	-0.212414	0.589687	0.497652	0.00503714	-0.144626	0.0153675
FBgn0031726	FBgn0002869	Cyp6a16	MtnB	-0.270757	-0.322597	-0.393668	-0.29256	0.164333	-0.0636572	-0.253223	-0.266627	0.177068	-0.23666	-0.338598	-0.110988
FBgn0031726	FBgn0033451	Cyp6a16	CG1665	0.407162	0.268512	0.458649	0.739471	0.40575	0.389813	0.344062	0.462051	0.216597	0.202937	0.610347	0.236916
FBgn0031726	FBgn0033205	Cyp6a16	CG2064	0.566786	0.376104	0.319971	0.255493	0.0283896	-0.0523339	0.495689	0.122087	0.00768377	0.29463	0.078716	0.0344916
FBgn0031726	FBgn0051097	Cyp6a16	CG31097	0.475837	-0.0593438	0.196898	0.113323	0.234006	-0.482804	0.338513	0.191497	0.1512	0.0372236	0.127209	-0.391189
FBgn0031726	FBgn0038674	Cyp6a16	CG14285	0.557181	0.196292	0.107365	-0.407535	0.296842	-0.416252	0.401776	0.113891	0.211731	0.179032	-0.295654	-0.435328
FBgn0031726	FBgn0264721	Cyp6a16	CR43989	-0.303896	-0.25088	0.205678	-0.0941298	0.283428	0.333299	-0.326389	-0.0180995	0.303082	-0.193631	-0.182361	0.494237
FBgn0031726	FBgn0051664	Cyp6a16	CG31664	0.257538	-0.116691	0.336611	0.677014	0.507769	0.377176	0.132332	0.257236	0.465039	-0.0501153	0.544523	0.509861
FBgn0039612	FBgn0039525	CG14523	CG5646	0.846967	0.764936	0.576832	0.0289997	0.672306	-0.0628141	0.726629	0.37548	0.529412	0.430889	0.23777	0.120721
FBgn0039612	FBgn0263763	CG14523	CG43680	0.532678	0.33298	0.126541	-0.363956	0.630334	0.461458	0.39819	0.164091	0.339537	0.288824	-0.139759	0.301972
FBgn0039612	FBgn0037225	CG14523	TwdlG	0.317648	-0.140599	0.447308	-0.197755	0.085914	-0.366543	0.322974	0.282848	-0.0104158	-0.0664219	-0.15248	-0.0864851
FBgn0039612	FBgn0039886	CG14523	CG2003	0.188361	0.151318	0.890731	0.751702	0.521632	0.451836	0.00375651	0.643302	0.602151	0.186374	0.526168	0.283446
FBgn0039612	FBgn0036787	CG14523	CG4306	0.391746	-0.109356	0.30203	0.481013	0.407761	0.0271388	0.156578	0.112781	0.540937	-0.211048	0.330061	0.0628362
FBgn0039612	FBgn0030993	CG14523	Mec2	0.906524	0.895901	0.533076	0.542068	0.546489	0.401419	0.716554	0.303424	0.419534	0.646717	0.541279	0.500299
FBgn0039612	FBgn0037230	CG14523	CG9780	0.836359	0.748528	0.357911	0.45171	0.576782	0.523287	0.653974	0.134466	0.455562	0.553061	0.428242	0.607274
FBgn0039612	FBgn0050428	CG14523	CG30428	0.220698	-0.0128616	0.022059	0.0537187	0.159617	-0.293738	0.171263	0.0594212	0.133612	-0.0609579	-0.0524204	-0.117009
FBgn0039612	FBgn0267408	CG14523	AOX1	0.754192	0.800424	0.202494	0.502781	0.492307	0.266314	0.517032	0.0519081	0.278579	0.606847	0.495347	0.504397
FBgn0039612	FBgn0261509	CG14523	haf	0.70209	0.513258	-0.155803	-0.623115	0.123011	-0.141279	0.63596	-0.259541	0.0391019	0.246137	-0.379664	-0.163664
FBgn0039612	FBgn0262007	CG14523	CG42825	0.711516	0.836867	0.108906	0.552119	0.764789	0.837829	0.556988	0.189448	0.563562	0.639375	0.399129	0.690686
FBgn0039612	FBgn0030600	CG14523	hiw	0.818189	0.281722	0.223621	0.228667	0.523056	-0.106578	0.571673	0.186118	0.445915	0.182959	0.230855	0.0148553
FBgn0039612	FBgn0037000	CG14523	ZnT77C	0.0561845	0.145088	0.373001	0.222268	0.0187806	0.253203	0.193546	0.280201	-0.0649705	0.180569	0.101682	0.26953
FBgn0039612	FBgn0040342	CG14523	CG3706	0.159969	-0.215763	0.821555	0.780825	0.854117	0.799005	0.104072	0.641253	0.695552	0.0303082	0.663878	0.558866
FBgn0039612	FBgn0030367	CG14523	Cyp311a1	0.924838	0.958176	0.822927	0.831875	0.910178	0.770621	0.755912	0.647486	0.784854	0.834628	0.73158	0.743447
FBgn0039612	FBgn0027934	CG14523	alpha-Est4aPsi	0.116259	-0.27655	0.296694	0.251009	0.703058	0.483518	0.079399	0.244856	0.562025	0.0415777	0.214463	0.392214
FBgn0039612	FBgn0035243	CG14523	CG13926	0.572418	0.338541	-0.540702	-0.0688528	0.347993	0.403903	0.413558	-0.371894	-0.103219	0.407752	-0.0160505	0.273201
FBgn0039612	FBgn0034817	CG14523	Art7	0.767852	0.886131	0.796855	0.505382	0.901938	0.211277	0.554939	0.513105	0.687954	0.636131	0.403739	0.197473
FBgn0039612	FBgn0014073	CG14523	Tie	0.103511	0.00584389	0.367312	-0.401664	0.48099	-0.574512	-0.0597627	0.199095	0.302143	-0.15026	-0.283275	-0.198497
FBgn0039612	FBgn0038173	CG14523	Adgf-C	0.681326	0.832116	0.454736	0.671013	0.776058	-0.0606439	0.491676	0.297447	0.584052	0.587979	0.478272	0.178349
FBgn0039612	FBgn0037975	CG14523	CG3397	0.439725	0.614626	0.650037	0.595127	0.380098	0.246521	0.247332	0.400922	0.524887	0.539828	0.389653	0.361052
FBgn0039612	FBgn0032399	CG14523	CG6785	-0.246368	-0.201892	-0.48508	-0.757913	-0.151784	-0.366165	-0.173739	-0.298045	-0.245283	-0.255357	-0.528729	-0.355161
FBgn0039612	FBgn0036550	CG14523	CG17026	0.482737	-0.20312	0.856793	0.778631	0.627763	0.0412542	0.31623	0.70298	0.606762	-0.0131478	0.549304	0.121916
FBgn0039612	FBgn0035670	CG14523	CG10472	0.763012	0.60516	0.733543	0.667086	0.71033	0.384223	0.660377	0.608213	0.567148	0.527363	0.492786	0.318706
FBgn0039612	FBgn0039777	CG14523	Jon99Fii	0.294053	-0.0229199	0.565901	0.730019	0.403475	-0.0875536	0.0657389	0.460087	0.256126	-0.0424315	0.535132	-0.0531888
FBgn0039612	FBgn0002962	CG14523	nos	-0.617704	0.0839361	-0.333148	0.175278	-0.627315	0.0660862	-0.661146	-0.29685	-0.584052	-0.272518	0.153249	0.175105
FBgn0039612	FBgn0037408	CG14523	NPFR	0.414832	0.134096	0.319017	0.635167	0.688587	0.416925	0.38214	0.32767	0.476052	0.132502	0.321694	0.340306
FBgn0039612	FBgn0039494	CG14523	grass	0.866028	0.869158	0.683313	0.832401	0.495345	0.589902	0.681209	0.372492	0.434731	0.603261	0.668232	0.500213
FBgn0039612	FBgn0015036	CG14523	Cyp4ae1	0.883836	0.745818	0.710733	0.806447	0.87399	0.349287	0.714078	0.491761	0.736361	0.515325	0.662085	0.457099
FBgn0039612	FBgn0267828	CG14523	Fatp	0.903403	0.950562	0.90718	0.71165	0.936539	0.25746	0.776488	0.733629	0.868693	0.663536	0.50064	0.38564
FBgn0039612	FBgn0038034	CG14523	Cyp9f3	0.367859	0.0326671	0.722674	0.779044	0.661174	0.491731	0.186801	0.610177	0.657048	0.00204901	0.57449	0.371724
FBgn0039612	FBgn0022702	CG14523	Cht2	0.10991	0.630844	0.526046	0.780907	-0.574413	0.320869	0.00683002	0.0499445	-0.544694	0.584223	0.638777	0.50858
FBgn0039612	FBgn0032470	CG14523	CG5142	0.197602	-0.367442	0.499621	0.359929	0.248167	-0.344998	0.117647	0.40852	0.25365	-0.0869974	-0.0266371	-0.197729
FBgn0039612	FBgn0069973	CG14523	CG40485	0.448647	-0.0797318	0.00815884	-0.640378	0.488132	-0.232402	0.440536	0.0107573	0.442414	0.0811065	-0.420729	-0.0876804
FBgn0039612	FBgn0031141	CG14523	CG1304	0.568297	0.305709	0.687737	0.651985	0.0436102	-0.198595	0.395885	0.603263	-0.0123794	0.355161	0.486249	-0.1582
FBgn0039612	FBgn0013771	CG14523	Cyp6a9	0.205668	0.11122	0.368873	0.603136	0.367203	0.241666	0.0768377	0.404764	0.550585	0.040724	0.483224	0.408264
FBgn0039612	FBgn0031935	CG14523	CG13793	0.565962	0.021072	0.42879	0.358946	0.632926	0.344055	0.331	0.414326	0.672928	0.0408094	0.415863	0.444634
FBgn0039612	FBgn0029906	CG14523	xit	0.309393	0.933455	0.562954	0.819553	0.720909	0.306763	0.225476	0.437207	0.527107	0.615299	0.616836	0.262017
FBgn0039612	FBgn0035227	CG14523	Iml1	0.836263	0.781568	-0.0253924	0.22001	0.563789	0.273157	0.659267	-0.0665927	0.285068	0.634082	0.205669	0.446171
FBgn0039612	FBgn0040725	CG14523	CG13946	-0.395311	-0.148681	0.168397	0.408378	-0.448304	0.0720966	-0.67968	-0.0421177	-0.208574	-0.355161	0.367967	0.0702638
FBgn0039612	FBgn0260874	CG14523	Ir76a	0.608526	0.159655	0.114482	-0.364701	0.261459	0.108995	0.453001	0.120635	0.131649	0.0548963	-0.247759	0.146931
FBgn0039612	FBgn0031307	CG14523	MFS3	0.635046	0.648571	0.323533	0.721472	0.553625	0.158481	0.568087	0.187057	0.364638	0.635277	0.502433	0.326902
FBgn0039612	FBgn0259748	CG14523	CG42397	0.604475	0.286376	0.815109	0.859221	0.790556	0.338268	0.470076	0.708273	0.636985	0.299923	0.59387	0.217963
FBgn0039612	FBgn0040554	CG14523	CR17025	0.0518183	0.0497693	0.337886	0.47289	0.351701	0.147913	-0.00853752	0.143174	0.466149	-0.0501153	0.188679	0.142064
FBgn0039612	FBgn0034494	CG14523	CG10444	-0.127676	0.267721	0.340456	0.672807	0.111188	0.358322	-0.26159	0.260394	-0.138393	0.169726	0.548365	0.210621
FBgn0039612	FBgn0015568	CG14523	alpha-Est1	0.510905	0.806236	0.607098	0.821161	0.710364	0.739483	0.300265	0.546999	0.655084	0.613677	0.742081	0.757705
FBgn0039612	FBgn0260720	CG14523	CR42547	0.286511	-0.29997	-0.106997	-0.726337	0.472079	-0.408316	0.145906	-0.173653	0.25937	-0.284897	-0.624434	-0.388287
FBgn0039612	FBgn0035666	CG14523	Jon65Aii	0.321002	-0.360398	0.702287	0.761498	0.164763	-0.0480446	0.15692	0.478187	0.0645437	-0.12977	0.550841	-0.015709
FBgn0039612	FBgn0031735	CG14523	CG11029	0.952029	0.849497	0.527287	0.58418	0.745393	0.155494	0.783147	0.484504	0.596944	0.5324	0.3993	0.31068
FBgn0039612	FBgn0036483	CG14523	CG12316	-0.273895	0.326443	-0.693726	-0.630081	-0.797663	-0.115225	-0.467685	-0.627081	-0.721933	-0.0517374	-0.438658	-0.10245
FBgn0039612	FBgn0032147	CG14523	IP3K1	-0.262487	0.130436	-0.23786	-0.541193	-0.320952	-0.211927	-0.437121	-0.343208	-0.221463	-0.000853752	-0.561342	-0.198497
FBgn0039612	FBgn0035667	CG14523	Jon65Ai	0.615583	0.292967	0.880445	0.871018	0.725458	0.300537	0.457953	0.733885	0.480919	0.221122	0.522923	0.178946
FBgn0039612	FBgn0029603	CG14523	CG14053	-0.235993	0.0446401	0.424281	-0.13488	0.448007	-0.238985	-0.333049	0.321694	0.455989	-0.0909246	-0.151968	-0.0476394
FBgn0039612	FBgn0002869	CG14523	MtnB	-0.341928	-0.424627	-0.484849	-0.616247	0.125705	-0.30263	-0.311534	-0.355161	0.13643	-0.27986	-0.383847	-0.320413
FBgn0039612	FBgn0033451	CG14523	CG1665	0.334303	0.293613	0.682974	0.743647	0.487839	0.494218	0.217963	0.503799	0.319047	0.268847	0.562879	0.395714
FBgn0039612	FBgn0033205	CG14523	CG2064	0.82496	0.847305	0.725042	0.499361	0.306743	0.326348	0.668915	0.57227	0.259028	0.594553	0.29463	0.270042
FBgn0039612	FBgn0051097	CG14523	CG31097	0.50442	-0.241633	0.361142	-0.133	0.340864	-0.276387	0.389994	0.286434	0.325792	-0.262102	-0.129173	-0.160164
FBgn0039612	FBgn0038674	CG14523	CG14285	0.569766	0.24109	0.600069	-0.229027	0.432402	-0.186354	0.421156	0.463075	0.436353	0.140357	-0.190216	-0.162554
FBgn0039612	FBgn0264721	CG14523	CR43989	-0.253732	-0.192985	-0.130467	-0.153336	0.180422	0.284553	-0.368821	-0.166652	0.149663	-0.194143	-0.213097	0.236489
FBgn0039612	FBgn0051664	CG14523	CG31664	0.0848508	-0.0293507	-0.00947635	0.829148	0.50825	0.408233	-0.124989	-0.0472125	0.520789	0.0299667	0.599163	0.469991
FBgn0039525	FBgn0263763	CG5646	CG43680	0.242465	0.152865	0.270541	-0.412605	0.336005	0.163609	0.319816	0.107061	0.228379	0.302826	-0.130368	0.133441
FBgn0039525	FBgn0037225	CG5646	TwdlG	-0.0419846	-0.122438	0.424111	0.00727254	0.31667	0.427412	0.149919	0.268078	0.222146	0.0289422	0.031162	0.235465
FBgn0039525	FBgn0039886	CG5646	CG2003	0.264106	0.0459448	0.612536	-0.553438	-0.102179	-0.420203	0.119013	0.372151	0.140528	0.00281738	-0.102365	-0.103219
FBgn0039525	FBgn0036787	CG5646	CG4306	0.236419	-0.114749	0.426849	0.0327872	0.114281	-0.647722	0.0761547	0.113464	0.18663	-0.149407	-0.0547255	-0.262529
FBgn0039525	FBgn0030993	CG5646	Mec2	0.934367	0.934326	0.719277	0.720165	0.838587	0.818251	0.732434	0.713737	0.56766	0.65295	0.500896	0.606335
FBgn0039525	FBgn0037230	CG5646	CG9780	0.833518	0.880026	0.464922	0.620659	0.642099	0.486997	0.55639	0.483395	0.507641	0.684624	0.346026	0.428754
FBgn0039525	FBgn0050428	CG5646	CG30428	0.00528095	-0.180987	0.22024	-0.198516	0.450661	-0.342236	-0.0342355	0.187569	0.270127	-0.0657389	-0.162896	-0.308894
FBgn0039525	FBgn0267408	CG5646	AOX1	0.900493	0.84866	0.497249	0.442725	0.567138	0.635779	0.567062	0.420814	0.272945	0.626654	0.179971	0.484163
FBgn0039525	FBgn0261509	CG5646	haf	0.626489	0.689879	0.347399	0.413885	0.705423	0.577772	0.518825	0.0576283	0.487407	0.409118	0.0221976	0.263553
FBgn0039525	FBgn0262007	CG5646	CG42825	0.701513	0.725819	0.00180977	0.146332	0.458299	0.246709	0.499957	0.330658	0.377444	0.502775	0.00554939	0.232306
FBgn0039525	FBgn0030600	CG5646	hiw	0.913871	0.302712	0.593878	0.541529	0.738721	0.411207	0.649108	0.467259	0.647059	0.190643	0.298728	0.352258
FBgn0039525	FBgn0037000	CG5646	ZnT77C	-0.104216	-0.217408	0.379148	-0.299193	0.189891	0.16282	0.00572014	0.286605	0.232818	-0.132161	0.123026	0.339452
FBgn0039525	FBgn0040342	CG5646	CG3706	-0.0118977	-0.507129	0.430913	-0.355221	0.211249	-0.194568	0.0490054	0.284556	0.271579	-0.261077	-0.0350038	-0.120379
FBgn0039525	FBgn0030367	CG5646	Cyp311a1	0.875043	0.836188	0.763414	0.449018	0.759154	0.341574	0.698711	0.586869	0.55511	0.566465	0.376249	0.307778
FBgn0039525	FBgn0027934	CG5646	alpha-Est4aPsi	-0.154641	-0.53925	0.32718	-0.342525	0.719017	0.319146	0.014343	0.210621	0.50286	-0.132161	-0.0572868	0.0757278
FBgn0039525	FBgn0035243	CG5646	CG13926	0.45563	0.250451	-0.208862	0.162896	-0.302918	-0.0735269	0.371894	-0.134124	-0.56433	0.406301	0.137796	-0.0977546
FBgn0039525	FBgn0034817	CG5646	Art7	0.725161	0.967018	0.513531	0.85488	0.383333	0.816226	0.52796	0.248442	0.177154	0.687356	0.779817	0.742594
FBgn0039525	FBgn0014073	CG5646	Tie	0.137448	0.220025	0.640489	0.450255	0.817152	0.323587	0.061214	0.434304	0.673696	0.0809357	0.188167	0.152224
FBgn0039525	FBgn0038173	CG5646	Adgf-C	0.913028	0.831788	0.87532	0.518924	0.866169	0.871729	0.739862	0.644668	0.683514	0.539742	0.26287	0.482541
FBgn0039525	FBgn0037975	CG5646	CG3397	0.117274	0.270476	0.544152	0.0344321	-0.0373163	-0.729197	0.0660804	0.266371	0.0879365	0.274908	0.0381627	-0.127551
FBgn0039525	FBgn0032399	CG5646	CG6785	0.059439	0.00522283	0.19343	0.0539708	0.445657	0.269283	0.033894	0.196107	0.440536	0.164689	-0.0849483	0.24349
FBgn0039525	FBgn0036550	CG5646	CG17026	0.423353	-0.661126	0.639542	-0.299326	0.510128	-0.519813	0.304619	0.374797	0.434645	-0.323657	-0.0852045	-0.277128
FBgn0039525	FBgn0035670	CG5646	CG10472	0.773254	0.206206	0.789151	0.0580062	0.798132	0.523262	0.695381	0.510971	0.722701	0.278665	0.0878511	0.301631
FBgn0039525	FBgn0039777	CG5646	Jon99Fii	0.356392	-0.252915	0.625762	-0.0735933	0.76418	0.437869	0.219414	0.386579	0.489883	-0.238453	0.0688978	0.232477
FBgn0039525	FBgn0002962	CG5646	nos	-0.591273	0.0299005	-0.503151	-0.0977961	-0.683579	-0.0590739	-0.53573	-0.270213	-0.626996	-0.178263	-0.0258687	-0.363528
FBgn0039525	FBgn0037408	CG5646	NPFR	0.362974	-0.239106	0.13012	-0.102043	0.72162	0.250725	0.360796	0.0706053	0.308717	-0.17852	0.00853752	0.202169
FBgn0039525	FBgn0039494	CG5646	grass	0.762534	0.72622	0.782792	0.0802169	0.804891	0.0509039	0.783318	0.71681	0.697601	0.551439	0.27875	0.182618
FBgn0039525	FBgn0015036	CG5646	Cyp4ae1	0.936286	0.459554	0.696884	-0.227702	0.698102	0.668016	0.602664	0.537693	0.454452	0.322462	-0.064629	0.440963
FBgn0039525	FBgn0267828	CG5646	Fatp	0.736966	0.733444	0.591977	0.268057	0.691275	0.544713	0.660292	0.413387	0.560744	0.294715	0.196875	0.345599
FBgn0039525	FBgn0038034	CG5646	Cyp9f3	0.224865	-0.452602	0.409177	-0.495751	0.237664	-0.69398	0.110476	0.300435	0.317852	-0.340476	-0.258687	-0.330146
FBgn0039525	FBgn0022702	CG5646	Cht2	-0.118699	0.425922	0.313095	0.2666	-0.55829	0.234361	-0.132758	0.0458465	-0.413216	0.423632	0.443097	0.15581
FBgn0039525	FBgn0032470	CG5646	CG5142	0.379815	-0.166315	0.740837	-0.294107	0.604467	-0.00726607	0.242551	0.463331	0.562879	-0.012294	-0.106121	0.105865
FBgn0039525	FBgn0069973	CG5646	CG40485	0.13709	-0.274257	0.58896	0.317512	0.770352	0.222642	0.289422	0.327072	0.704858	-0.0906685	0.119696	0.164347
FBgn0039525	FBgn0031141	CG5646	CG1304	0.376237	0.114284	0.179197	-0.410933	0.301004	0.181681	0.299838	0.289119	0.283702	0.245198	-0.126751	0.112354
FBgn0039525	FBgn0013771	CG5646	Cyp6a9	0.48914	0.0174164	0.22476	0.178503	-0.0343938	-0.414086	0.155895	0.270639	0.0163067	0.0724836	0.0123794	-0.190301
FBgn0039525	FBgn0031935	CG5646	CG13793	0.400506	-0.0765943	0.278775	0.0908129	0.154725	-0.68662	0.288141	0.10245	0.16153	0.0269786	0.0885341	-0.328353
FBgn0039525	FBgn0029906	CG5646	xit	0.185474	0.896554	0.240427	0.594971	0.69901	0.731572	0.171007	0.185606	0.306753	0.554683	0.501409	0.582003
FBgn0039525	FBgn0035227	CG5646	Iml1	0.910247	0.768849	0.349152	0.358873	0.556299	0.210511	0.685051	0.230001	0.203535	0.611799	0.187996	0.350465
FBgn0039525	FBgn0040725	CG5646	CG13946	-0.217785	-0.0414255	0.520171	0.256425	-0.0762391	0.199404	-0.455529	0.21862	0.0918834	-0.184325	0.268078	0.19107
FBgn0039525	FBgn0260874	CG5646	Ir76a	0.294976	0.239546	0.28749	-0.0968104	0.128071	0.464472	0.261846	0.0952787	-0.112183	0.223427	0.0968155	0.265858
FBgn0039525	FBgn0031307	CG5646	MFS3	0.903079	0.446192	0.853259	0.136564	0.851898	0.575614	0.680953	0.592675	0.656621	0.467685	0.244685	0.321523
FBgn0039525	FBgn0259748	CG5646	CG42397	0.61879	-0.180641	0.515032	-0.296473	0.824453	0.599464	0.473406	0.435414	0.586357	-0.16392	-0.0276616	0.340647
FBgn0039525	FBgn0040554	CG5646	CR17025	-0.257609	-0.282607	0.288835	-0.376891	-0.0557704	-0.468563	-0.107487	0.00375651	-0.00469564	-0.286861	-0.0211731	-0.250918
FBgn0039525	FBgn0034494	CG5646	CG10444	-0.447879	-0.21869	-0.336711	-0.201999	-0.46893	-0.0630426	-0.311876	-0.192948	-0.476394	-0.213267	-0.000939127	-0.229147
FBgn0039525	FBgn0015568	CG5646	alpha-Est1	0.67116	0.76451	0.567435	0.380692	0.247499	0.146968	0.358149	0.26159	0.215743	0.456672	0.284726	0.224025
FBgn0039525	FBgn0260720	CG5646	CR42547	0.305523	-0.212104	0.473227	0.160492	0.786453	0.48906	0.20823	0.256553	0.583881	-0.263041	-0.0556646	0.296508
FBgn0039525	FBgn0035666	CG5646	Jon65Aii	0.405139	-0.244955	0.431756	-0.154967	0.693083	0.578258	0.262187	0.159054	0.493469	-0.05575	0.0298813	0.271493
FBgn0039525	FBgn0031735	CG5646	CG11029	0.810318	0.931061	0.787316	0.664121	0.893967	0.888807	0.689746	0.621019	0.775378	0.5359	0.425425	0.710151
FBgn0039525	FBgn0036483	CG5646	CG12316	-0.0707879	0.621675	-0.253665	0.392862	-0.555021	0.14362	-0.399215	-0.308461	-0.622044	0.309912	-0.099206	-0.104158
FBgn0039525	FBgn0032147	CG5646	IP3K1	0.0680326	0.144389	0.511572	0.0489336	0.359416	0.348553	-0.247076	0.228635	0.162298	0.199693	-0.0204901	0.377956
FBgn0039525	FBgn0035667	CG5646	Jon65Ai	0.525603	-0.312415	0.302096	-0.0748071	0.798397	0.619308	0.439853	0.199266	0.570306	-0.0883634	-0.0624093	0.388884
FBgn0039525	FBgn0029603	CG5646	CG14053	-0.187554	0.0278257	0.235506	0.0217074	-0.0592408	-0.215957	-0.24904	-0.0198924	0.0295398	0.11372	0.0437121	-0.0513105
FBgn0039525	FBgn0002869	CG5646	MtnB	0.0563647	-0.072455	0.258755	0.18522	0.335864	-0.150003	-0.0555793	0.192692	0.2446	-0.0726543	0.0878511	-0.19107
FBgn0039525	FBgn0033451	CG5646	CG1665	0.484135	0.170894	0.468362	-0.170247	-0.139136	-0.346889	0.266627	0.199266	-0.0801673	0.0994621	-0.0788013	-0.249296
FBgn0039525	FBgn0033205	CG5646	CG2064	0.577566	0.441311	0.504068	-0.284202	0.34079	0.376385	0.550243	0.429352	0.185435	0.367626	0.0341501	0.279945
FBgn0039525	FBgn0051097	CG5646	CG31097	0.521967	0.0363233	0.834284	-0.0757614	0.620668	0.113947	0.437548	0.528473	0.562708	0.014343	-0.169811	0.127465
FBgn0039525	FBgn0038674	CG5646	CG14285	0.372645	0.203637	0.624136	-0.190768	0.612405	0.245497	0.513105	0.509349	0.634167	0.276616	0.0940835	0.234013
FBgn0039525	FBgn0264721	CG5646	CR43989	-0.0328687	-0.202959	-0.173364	0.00764807	-0.308595	-0.500787	-0.351234	-0.139162	-0.372065	-0.191241	-0.234526	-0.2411
FBgn0039525	FBgn0051664	CG5646	CG31664	-0.0276303	-0.193944	-0.349802	-0.149069	-0.0119963	-0.729868	-0.0813626	-0.122513	-0.046871	-0.0446512	-0.0229659	-0.230684
FBgn0263763	FBgn0037225	CG43680	TwdlG	0.618316	-0.171698	0.598903	0.513836	0.76487	0.388502	0.523009	0.558269	0.573209	0.0480663	0.391616	0.394434
FBgn0263763	FBgn0039886	CG43680	CG2003	0.0116312	-0.0132985	0.0363984	0.0779315	-0.111752	-0.173339	-0.0960471	0.0531034	0.0488346	-0.16947	0.0611287	-0.139759
FBgn0263763	FBgn0036787	CG43680	CG4306	0.126001	-0.205482	-0.403043	-0.385927	-0.180362	-0.573451	0.0537864	-0.283616	-0.264236	-0.163067	-0.171263	-0.519594
FBgn0263763	FBgn0030993	CG43680	Mec2	0.515194	0.367427	0.183065	-0.0962567	0.784332	0.563092	0.578503	0.201827	0.321608	0.483309	-0.0264663	0.404764
FBgn0263763	FBgn0037230	CG43680	CG9780	0.411952	0.29397	0.607683	-0.0818739	0.706315	0.616921	0.555878	0.359259	0.376675	0.423546	0.0648852	0.423034
FBgn0263763	FBgn0050428	CG43680	CG30428	0.255188	0.354659	0.484901	0.367199	-0.324639	-0.812552	0.50508	0.239051	-0.185179	0.474089	0.316571	-0.58257
FBgn0263763	FBgn0267408	CG43680	AOX1	0.275015	0.311455	-0.150359	-0.0842441	0.76541	0.577014	0.445146	0.0546401	0.335183	0.341074	0.039358	0.426961
FBgn0263763	FBgn0261509	CG43680	haf	0.5879	0.345606	0.472018	0.230894	0.142094	0.219796	0.682148	0.299069	0.164006	0.487493	0.0486639	0.121745
FBgn0263763	FBgn0262007	CG43680	CG42825	0.574627	0.380721	-0.214741	0.263422	0.637694	0.177746	0.546231	0.0771792	0.350636	0.392555	0.222402	0.114232
FBgn0263763	FBgn0030600	CG43680	hiw	0.311846	-0.202553	0.0061786	-0.397448	0.423304	0.0300104	0.197985	0.0390165	0.310168	-0.311876	-0.277469	0.0159652
FBgn0263763	FBgn0037000	CG43680	ZnT77C	0.6598	0.453022	0.822508	0.625892	0.69229	0.882391	0.670366	0.739947	0.550756	0.52668	0.475881	0.582942
FBgn0263763	FBgn0040342	CG43680	CG3706	0.122262	0.0731477	-0.198434	-0.324848	0.845339	0.429525	-0.0736788	-0.111671	0.513873	-0.140784	-0.17297	0.242893
FBgn0263763	FBgn0030367	CG43680	Cyp311a1	0.348567	0.266428	0.513702	-0.376739	0.657575	0.568495	0.225817	0.440536	0.344831	0.220695	-0.000426876	0.347904
FBgn0263763	FBgn0027934	CG43680	alpha-Est4aPsi	0.461042	-0.122891	0.83566	0.452477	0.875811	0.632548	0.266029	0.707163	0.72475	-0.059848	0.419107	0.494749
FBgn0263763	FBgn0035243	CG43680	CG13926	0.781322	0.593727	0.2198	0.49695	0.623598	0.304158	0.807393	0.189704	0.107487	0.751643	0.247076	0.288654
FBgn0263763	FBgn0034817	CG43680	Art7	0.54473	0.282621	-0.0615447	-0.424441	0.226097	0.0786206	0.424315	-0.0726543	0.153078	0.489542	-0.162981	-0.0409801
FBgn0263763	FBgn0014073	CG43680	Tie	-0.250007	-0.31839	0.293847	-0.072477	-0.167797	0.336527	-0.439426	0.0351746	-0.0792282	-0.576966	-0.0772646	0.253138
FBgn0263763	FBgn0038173	CG43680	Adgf-C	0.0576743	0.128718	0.551556	-0.165969	0.0965252	0.34697	-0.0245881	0.188423	0.0987791	0.231879	-0.0266371	0.290276
FBgn0263763	FBgn0037975	CG43680	CG3397	0.327676	0.589145	-0.221566	0.0532994	-0.14233	-0.44351	0.182191	-0.0099889	-0.154102	0.708017	0.187228	-0.238965
FBgn0263763	FBgn0032399	CG43680	CG6785	-0.232357	-0.019924	0.504491	0.525106	-0.0183084	-0.342372	-0.177666	0.384957	-0.0301375	-0.0809357	0.336208	-0.157176
FBgn0263763	FBgn0036550	CG43680	CG17026	0.00186596	-0.180054	0.1377	-0.244032	0.076117	-0.562833	-0.174592	0.0695808	-0.0410655	-0.327158	-0.209938	-0.476991
FBgn0263763	FBgn0035670	CG43680	CG10472	0.429593	0.439761	0.248164	-0.142741	0.672685	0.218677	0.408435	0.222402	0.356783	0.336805	-0.0466149	0.0708614
FBgn0263763	FBgn0039777	CG43680	Jon99Fii	-0.037858	-0.0848405	-0.0354301	-0.310481	0.370393	0.0596659	-0.371724	-0.127807	0.0627508	-0.389909	-0.329292	-0.137881
FBgn0263763	FBgn0002962	CG43680	nos	-0.241863	-0.0253801	-0.467843	-0.296887	-0.433646	0.0706291	-0.438402	-0.368053	-0.297789	-0.420814	-0.0796551	-0.0296252
FBgn0263763	FBgn0037408	CG43680	NPFR	0.485228	0.31123	0.411327	0.0148286	0.721988	0.651138	0.455733	0.354819	0.507983	0.442244	-0.0180142	0.504994
FBgn0263763	FBgn0039494	CG43680	grass	0.602825	0.533587	0.451677	-0.170506	-0.0411453	0.0178136	0.500299	0.229403	0.0573722	0.507726	0.00631777	-0.00495176
FBgn0263763	FBgn0015036	CG43680	Cyp4ae1	0.242549	0.308586	0.0257726	-0.0638173	0.72278	0.468083	0.214036	0.0558354	0.337232	0.289678	0.0700077	0.242466
FBgn0263763	FBgn0267828	CG43680	Fatp	0.473188	0.370481	0.162626	-0.255988	0.584122	-0.0169015	0.265432	0.191241	0.300435	0.340135	-0.147785	-0.0991206
FBgn0263763	FBgn0038034	CG43680	Cyp9f3	-0.098404	-0.129066	-0.228113	-0.0511521	0.071491	-0.204743	-0.305814	-0.105438	-0.0135747	-0.419875	-0.0663365	-0.215402
FBgn0263763	FBgn0022702	CG43680	Cht2	0.357308	0.251562	0.106582	-0.300458	-0.470631	0.00407635	0.235379	-0.0371382	-0.218304	0.380432	-0.0191241	0.0414924
FBgn0263763	FBgn0032470	CG43680	CG5142	0.194306	-0.253005	0.59571	0.0759604	0.105834	-0.551408	0.153249	0.426364	0.165116	-0.205242	0.139845	-0.330658
FBgn0263763	FBgn0069973	CG43680	CG40485	0.505958	0.238005	0.691474	0.287955	0.274168	-0.235182	0.486895	0.450269	0.186716	0.164945	0.198668	-0.296337
FBgn0263763	FBgn0031141	CG43680	CG1304	0.65733	0.620884	-0.158009	0.166239	0.203865	-0.0199068	0.548621	-0.0554322	0.2195	0.688295	0.0711479	-0.0922906
FBgn0263763	FBgn0013771	CG43680	Cyp6a9	-0.180233	-0.295799	-0.27008	-0.369738	-0.0179453	-0.00246318	-0.401093	-0.300692	0.0555793	-0.493725	-0.289422	0.0582259
FBgn0263763	FBgn0031935	CG43680	CG13793	0.216391	0.0663196	-0.224908	-0.313676	0.143734	-0.0654924	0.0716298	-0.183727	0.117476	0.0227098	-0.280287	-0.137881
FBgn0263763	FBgn0029906	CG43680	xit	0.241768	0.278922	-0.164924	-0.37808	0.0993143	0.0641097	0.088278	-0.245539	0.0488346	0.341928	-0.229745	0.00768377
FBgn0263763	FBgn0035227	CG43680	Iml1	0.519509	0.467731	0.294017	0.135393	0.661749	0.690123	0.640229	0.162128	0.281738	0.671391	0.0820456	0.570989
FBgn0263763	FBgn0040725	CG43680	CG13946	-0.0216879	-0.335928	-0.296831	-0.297744	-0.194629	0.538392	-0.545534	-0.201417	0.0929508	-0.703406	-0.287117	0.401007
FBgn0263763	FBgn0260874	CG43680	Ir76a	0.893819	0.424687	0.622065	0.602304	0.67834	0.699458	0.819688	0.436524	0.280372	0.580722	0.312729	0.596346
FBgn0263763	FBgn0031307	CG43680	MFS3	0.00750003	0.220583	0.320688	-0.374076	0.309834	0.271062	0.0775207	0.162981	0.139247	0.06258	-0.231367	0.0404679
FBgn0263763	FBgn0259748	CG43680	CG42397	0.0934647	-0.145466	-0.137634	-0.17097	0.467778	-0.10154	-0.0834116	-0.0405532	0.158456	-0.403313	-0.182532	-0.175702
FBgn0263763	FBgn0040554	CG43680	CR17025	0.166047	-0.244382	0.698498	-0.090214	0.0167754	-0.294309	0.0403825	0.297106	-0.0166482	-0.180825	-0.152992	-0.176471
FBgn0263763	FBgn0034494	CG43680	CG10444	0.0807911	0.0870446	-0.220708	-0.266515	0.221081	0.20887	-0.0988645	-0.141296	0.0658243	-0.114574	-0.277726	0.231879
FBgn0263763	FBgn0015568	CG43680	alpha-Est1	-0.0361977	0.0619986	0.374373	-0.45428	0.37683	0.365288	-0.230855	0.259285	0.285495	0.0742764	-0.20012	0.318108
FBgn0263763	FBgn0260720	CG43680	CR42547	-0.320426	-0.465527	0.486173	0.435544	0.373865	-0.106961	-0.281311	0.321608	0.197046	-0.609323	0.287715	-0.0619824
FBgn0263763	FBgn0035666	CG43680	Jon65Aii	-0.0538172	-0.206939	-0.094106	-0.408817	0.421869	0.0746643	-0.0312473	-0.0453342	0.22744	-0.252198	-0.330658	-0.0549816
FBgn0263763	FBgn0031735	CG43680	CG11029	0.584424	0.209298	0.702134	-0.201005	0.494615	0.252738	0.494066	0.434389	0.311193	0.264151	0.115769	0.224622
FBgn0263763	FBgn0036483	CG43680	CG12316	-0.325057	0.0297171	-0.00234484	0.263205	-0.565364	0.10801	-0.384615	-0.167421	-0.347306	0.0233928	0.205157	0.347563
FBgn0263763	FBgn0032147	CG43680	IP3K1	-0.275175	0.267912	0.419443	0.410911	-0.220738	0.259433	-0.36865	0.272945	-0.132844	0.540852	0.364979	0.259541
FBgn0263763	FBgn0035667	CG43680	Jon65Ai	0.200101	0.229614	0.0991985	-0.41469	0.365382	-0.146803	0.0874242	0.0303936	0.0846922	0.0595919	-0.200803	-0.182276
FBgn0263763	FBgn0029603	CG43680	CG14053	-0.379161	0.605905	-0.191474	0.252215	-0.276304	-0.687503	-0.695296	-0.181935	-0.0574575	0.418424	0.128404	-0.407411
FBgn0263763	FBgn0002869	CG43680	MtnB	-0.264441	-0.346078	-0.0330455	0.434438	0.219315	0.110815	-0.41979	-0.147699	0.0911807	-0.468881	0.242978	0.00836677
FBgn0263763	FBgn0033451	CG43680	CG1665	-0.0275787	0.0530366	-0.178981	-0.295129	-0.148602	-0.312143	-0.0399556	-0.129514	-0.0526765	-0.141637	-0.211731	-0.258772
FBgn0263763	FBgn0033205	CG43680	CG2064	0.707354	0.58318	0.0683057	0.122782	-0.599298	0.122228	0.561427	0.177922	-0.175361	0.685648	0.241356	0.0558354
FBgn0263763	FBgn0051097	CG43680	CG31097	0.345386	0.0762813	0.41324	0.374939	0.327785	-0.224529	0.373517	0.247674	0.258175	0.212926	0.123196	-0.200888
FBgn0263763	FBgn0038674	CG43680	CG14285	0.646876	0.726901	0.675899	0.32962	0.109561	-0.329608	0.427644	0.436438	0.149236	0.598395	0.292581	-0.236148
FBgn0263763	FBgn0264721	CG43680	CR43989	-0.436855	-0.228727	-0.105289	0.282748	0.224003	0.335152	-0.536156	-0.157005	-0.0140869	-0.475967	0.0801673	0.204986
FBgn0263763	FBgn0051664	CG43680	CG31664	0.199244	-0.0767442	-0.397549	-0.177882	-0.0610434	-0.140632	0.017758	-0.194912	0.249637	-0.112695	-0.0631777	0.0546401
FBgn0037225	FBgn0039886	TwdlG	CG2003	-0.140032	-0.454454	0.30243	-0.118482	-0.518806	-0.89145	-0.125928	0.0583967	-0.455391	-0.225647	-0.0601042	-0.611713
FBgn0037225	FBgn0036787	TwdlG	CG4306	0.331218	-0.416962	-0.148864	-0.541126	-0.56061	-0.693565	0.03526	-0.254589	-0.636131	-0.196022	-0.446427	-0.550585
FBgn0037225	FBgn0030993	TwdlG	Mec2	0.139563	-0.0968505	0.280671	0.347473	0.727492	0.511367	0.318962	0.340476	0.47776	-0.0842653	0.100657	0.409203
FBgn0037225	FBgn0037230	TwdlG	CG9780	0.104868	-0.223719	0.406417	-0.203223	0.649911	0.523249	0.212328	0.309571	0.530266	-0.133527	-0.0104158	0.438231
FBgn0037225	FBgn0050428	TwdlG	CG30428	0.232383	-0.232554	0.208748	-0.349978	-0.229317	-0.282607	0.137454	0.0974985	-0.190301	0.015709	-0.0142577	-0.230646
FBgn0037225	FBgn0267408	TwdlG	AOX1	-0.126371	-0.222889	-0.101869	0.0721667	0.742588	0.603427	0.0554085	0.0785452	0.511824	-0.175361	-0.0360283	0.450525
FBgn0037225	FBgn0261509	TwdlG	haf	0.472194	-0.159826	0.627032	0.371003	0.65277	0.788009	0.39358	0.312559	0.537779	-0.0731666	0.110305	0.521899
FBgn0037225	FBgn0262007	TwdlG	CG42825	-0.020879	-0.225637	-0.185295	0.378687	0.0544763	-0.152103	0.106378	0.111329	0.113208	-0.215999	0.190643	-0.0534449
FBgn0037225	FBgn0030600	TwdlG	hiw	-0.0551822	0.304061	0.355569	0.0693927	0.527041	0.65853	0.0956203	0.262443	0.479638	0.220439	0.053018	0.660975
FBgn0037225	FBgn0037000	TwdlG	ZnT77C	0.808007	0.543029	0.60827	0.670322	0.919894	0.58255	0.58482	0.564672	0.812601	0.545548	0.645693	0.581235
FBgn0037225	FBgn0040342	TwdlG	CG3706	0.516116	0.251276	0.139996	-0.100281	0.243535	-0.391091	0.425937	0.110561	0.0661658	0.352856	-0.0581405	-0.116793
FBgn0037225	FBgn0030367	TwdlG	Cyp311a1	0.305784	-0.102342	0.633979	-0.355079	0.377862	0.13482	0.281738	0.553914	0.221036	0.0340647	-0.208401	0.204986
FBgn0037225	FBgn0027934	TwdlG	alpha-Est4aPsi	0.743429	0.68512	0.581914	0.242257	0.734307	0.169754	0.598224	0.534961	0.560147	0.55622	0.308205	0.154444
FBgn0037225	FBgn0035243	TwdlG	CG13926	0.310088	-0.153576	-0.247326	0.324553	-0.136944	-0.279064	0.242039	-0.0596773	-0.147955	-0.0299667	0.241868	-0.319389
FBgn0037225	FBgn0034817	TwdlG	Art7	0.50296	-0.105216	0.236326	0.309764	-0.16851	0.317677	0.366772	-0.0343208	-0.16947	-0.113891	0.123794	0.164262
FBgn0037225	FBgn0014073	TwdlG	Tie	-0.53716	-0.0211469	0.613252	0.206384	0.00818865	0.62895	-0.442671	0.360625	0.0765816	-0.0552378	0.149151	0.309827
FBgn0037225	FBgn0038173	TwdlG	Adgf-C	-0.110088	-0.164886	0.616714	0.00165307	0.109568	0.678686	0.0471271	0.223085	0.0984376	-0.140869	-0.0140015	0.474345
FBgn0037225	FBgn0037975	TwdlG	CG3397	0.374302	-0.206153	-0.433043	-0.481879	-0.495511	-0.646669	0.22872	-0.273201	-0.575258	-0.0548963	-0.256979	-0.375907
FBgn0037225	FBgn0032399	TwdlG	CG6785	0.122537	-0.0410945	0.317641	0.180226	0.329782	0.42733	0.112781	0.212584	0.431572	0.0437975	0.261334	0.533766
FBgn0037225	FBgn0036550	TwdlG	CG17026	0.26733	-0.0766864	0.225899	-0.309416	-0.207449	-0.568182	0.096474	0.160335	-0.249723	0.0390165	-0.296252	-0.371041
FBgn0037225	FBgn0035670	TwdlG	CG10472	0.349463	-0.436138	0.718529	-0.0697693	0.474816	0.497677	0.260224	0.475967	0.367284	-0.0679587	-0.0396995	0.425169
FBgn0037225	FBgn0039777	TwdlG	Jon99Fii	0.204244	0.0981377	0.509506	-0.309515	0.357916	0.59382	0.107744	0.164262	0.253991	0.0946811	-0.268505	0.525399
FBgn0037225	FBgn0002962	TwdlG	nos	-0.252336	0.100875	-0.724361	0.479189	-0.349195	-0.0812466	-0.307522	-0.533851	-0.288824	0.272774	0.0885341	-0.57116
FBgn0037225	FBgn0037408	TwdlG	NPFR	0.78928	0.476579	0.390456	0.456077	0.529561	0.644019	0.73602	0.378639	0.392641	0.453428	0.275591	0.483224
FBgn0037225	FBgn0039494	TwdlG	grass	0.191163	-0.466219	0.356981	-0.227637	0.0176626	0.112939	0.279689	0.339879	0.106292	-0.221463	-0.0330402	0.186801
FBgn0037225	FBgn0015036	TwdlG	Cyp4ae1	-0.0362843	-0.259796	0.27994	-0.327416	0.366019	0.517073	0.186203	0.181593	0.189618	-0.0676172	-0.203364	0.427644
FBgn0037225	FBgn0267828	TwdlG	Fatp	0.557701	-0.0566875	0.23194	-0.500958	0.121894	0.300755	0.41074	0.251345	-0.00640314	0.156151	-0.300777	0.251089
FBgn0037225	FBgn0038034	TwdlG	Cyp9f3	-0.0377152	-0.147764	-0.114491	-0.313589	-0.377317	-0.75961	-0.0701784	-0.0711176	-0.475369	-0.193375	-0.25032	-0.596175
FBgn0037225	FBgn0022702	TwdlG	Cht2	0.690582	0.0319331	-0.0746012	-0.274959	-0.237535	-0.0373821	0.351404	-0.288312	-0.118245	0.0993768	-0.151541	0.103987
FBgn0037225	FBgn0032470	TwdlG	CG5142	0.390728	-0.0288641	0.495409	-0.422531	0.191017	0.103786	0.289507	0.41629	0.204986	-0.0104158	0.00887902	0.286775
FBgn0037225	FBgn0069973	TwdlG	CG40485	0.749831	0.103022	0.346787	-0.174229	0.115717	-0.0703066	0.602578	0.250576	0.0569453	0.190814	-0.143601	-0.0289422
FBgn0037225	FBgn0031141	TwdlG	CG1304	0.165565	-0.443909	-0.131329	0.0423601	0.414355	0.519796	0.0977546	-0.0829348	0.443354	-0.247844	-0.00760164	0.475881
FBgn0037225	FBgn0013771	TwdlG	Cyp6a9	-0.278328	-0.0751594	-0.0453439	-0.10362	-0.415724	-0.619614	-0.143772	-0.0358576	-0.451379	-0.194399	-0.0442244	-0.591394
FBgn0037225	FBgn0031935	TwdlG	CG13793	0.13743	-0.674917	0.150807	0.086541	-0.191208	-0.660368	-0.0144284	0.143516	-0.421071	-0.263383	0.0210023	-0.536413
FBgn0037225	FBgn0029906	TwdlG	xit	0.381503	-0.172702	-3.21704e-05	-0.0643151	-0.096588	0.423251	0.299838	-0.137454	-0.0929736	-0.123026	-0.0399556	0.35499
FBgn0037225	FBgn0035227	TwdlG	Iml1	0.163614	-0.333047	0.451391	0.340118	0.710269	0.558191	0.231025	0.247161	0.530863	-0.179288	0.218048	0.563903
FBgn0037225	FBgn0040725	TwdlG	CG13946	-0.20729	0.0507361	-0.370111	-0.416246	0.161407	0.134841	-0.329299	-0.278944	0.219589	0.0158798	-0.300777	0.0700931
FBgn0037225	FBgn0260874	TwdlG	Ir76a	0.60873	0.469706	0.282676	0.586326	0.255419	0.23616	0.552805	0.370358	0.0183557	0.444976	0.517374	0.115598
FBgn0037225	FBgn0031307	TwdlG	MFS3	-0.0763973	-0.212803	0.723158	-0.129675	0.425555	0.610647	0.13882	0.444634	0.315718	-0.0519081	-0.150858	0.413131
FBgn0037225	FBgn0259748	TwdlG	CG42397	0.350081	0.444036	0.486508	0.0741105	0.0909872	0.241691	0.234696	0.278579	0.0248442	0.206181	-0.000341501	0.24127
FBgn0037225	FBgn0040554	TwdlG	CR17025	0.469581	0.690527	0.438752	-0.413036	-0.41424	-0.735214	0.391958	0.174678	-0.558098	0.394092	-0.136003	-0.70204
FBgn0037225	FBgn0034494	TwdlG	CG10444	0.277901	0.0793888	-0.252185	-0.195961	-0.0633951	-0.118884	0.147955	-0.114744	-0.177068	0.109878	-0.00768377	-0.0827286
FBgn0037225	FBgn0015568	TwdlG	alpha-Est1	0.0163593	-0.215312	0.461638	-0.292946	-0.010385	-0.278005	0.00503714	0.186716	-0.137027	-0.12977	-0.152736	-0.225647
FBgn0037225	FBgn0260720	TwdlG	CR42547	-0.030404	0.159973	0.454065	0.0747092	0.467751	0.762544	0.0486639	0.412704	0.367113	0.125928	0.14454	0.647144
FBgn0037225	FBgn0035666	TwdlG	Jon65Aii	0.0402097	-0.510197	0.450667	-0.182026	0.514887	0.550674	-0.0164774	0.326646	0.439512	-0.214121	-0.227013	0.504141
FBgn0037225	FBgn0031735	TwdlG	CG11029	0.494576	-0.30687	0.598692	-0.253944	0.340014	0.471247	0.469649	0.429864	0.235123	-0.279775	0.0556646	0.314949
FBgn0037225	FBgn0036483	TwdlG	CG12316	-0.63824	-0.0692036	-0.000761016	0.190351	0.032742	0.0983869	-0.543328	-0.258516	0.0232221	-0.0867412	0.0631777	0.242124
FBgn0037225	FBgn0032147	TwdlG	IP3K1	-0.654688	0.376338	0.299588	0.255327	0.272545	0.775056	-0.461538	0.0689832	0.132417	0.260394	0.171092	0.6474
FBgn0037225	FBgn0035667	TwdlG	Jon65Ai	0.45436	-0.0840102	0.466635	-0.332561	0.156906	0.265619	0.31179	0.18774	-0.0310766	0.0159652	-0.229915	0.337403
FBgn0037225	FBgn0029603	TwdlG	CG14053	-0.0360375	0.0738443	0.235483	0.16488	-0.47515	-0.521222	-0.0469564	0.102023	-0.471613	0.221634	0.0993768	-0.289678
FBgn0037225	FBgn0002869	TwdlG	MtnB	-0.45348	0.161119	-0.0156826	0.466534	0.269152	-0.128172	-0.330914	-0.0332963	0.0770085	0.0391019	0.204901	-0.132929
FBgn0037225	FBgn0033451	TwdlG	CG1665	-0.195732	-0.266767	-0.196009	-0.411056	-0.524507	-0.554283	-0.106121	-0.207206	-0.431913	-0.0725689	-0.2481	-0.388884
FBgn0037225	FBgn0033205	TwdlG	CG2064	0.281948	-0.164212	-0.104631	-0.115247	-0.485026	-0.0504005	0.263468	-0.0392726	-0.299838	-0.0395287	0.0901562	0.123111
FBgn0037225	FBgn0051097	TwdlG	CG31097	0.244391	-0.265816	0.484393	-0.314355	0.185239	0.413036	0.178776	0.34244	0.201229	-0.270639	-0.0431999	0.386323
FBgn0037225	FBgn0038674	TwdlG	CG14285	0.66401	-0.393375	0.544237	-0.137382	0.106562	0.083317	0.48348	0.38564	0.151029	-0.12977	0.11833	0.288995
FBgn0037225	FBgn0264721	TwdlG	CR43989	-0.716417	-0.138222	0.055255	0.00703425	-0.136959	-0.384188	-0.465551	-0.090327	-0.317254	-0.0215146	-0.010245	-0.360283
FBgn0037225	FBgn0051664	TwdlG	CG31664	-0.128279	-0.00924937	-0.444895	-0.015683	-0.488476	-0.66877	-0.173568	-0.213182	-0.252113	0.060531	0.0915222	-0.406471
FBgn0039886	FBgn0036787	CG2003	CG4306	0.312236	0.293125	0.223194	0.239485	0.779984	0.589703	0.150346	0.0387604	0.668488	0.214889	0.198583	0.523948
FBgn0039886	FBgn0030993	CG2003	Mec2	0.0802438	0.0684161	0.356604	-0.196258	-0.386544	-0.481091	-0.157517	0.213011	-0.131563	-0.0548109	0.0618117	-0.342269
FBgn0039886	FBgn0037230	CG2003	CG9780	-0.0954335	0.229734	0.0367359	-0.184546	-0.191381	-0.420702	-0.201571	-0.0130624	-0.0418339	0.138052	-0.0135747	-0.279092
FBgn0039886	FBgn0050428	CG2003	CG30428	-0.0173865	-0.15587	-0.0618788	0.223793	0.0573513	0.253181	-0.155895	-0.00128063	0.0431145	-0.102963	0.198156	0.339331
FBgn0039886	FBgn0267408	CG2003	AOX1	-0.127841	0.30962	-0.0718152	-0.0774765	-0.323066	-0.514064	-0.20584	-0.0922906	-0.160505	0.165799	0.0563476	-0.438231
FBgn0039886	FBgn0261509	CG2003	haf	0.0309028	-0.106382	-0.191329	-0.61564	-0.370564	-0.638756	-0.192948	-0.395714	-0.344831	-0.285922	-0.620166	-0.469991
FBgn0039886	FBgn0262007	CG2003	CG42825	0.176622	0.220597	-0.0654281	0.290953	0.108066	0.117525	-0.0542986	-0.0918637	0.263212	0.0350038	0.179886	0.155981
FBgn0039886	FBgn0030600	CG2003	hiw	0.387152	0.368732	0.20474	-0.222378	-0.0876113	-0.491939	0.122684	0.138991	-0.0315888	0.221634	-0.00469564	-0.469222
FBgn0039886	FBgn0037000	CG2003	ZnT77C	-0.204239	-0.245193	0.252048	0.40446	-0.381317	-0.413674	-0.171775	0.149748	-0.382908	0.0122087	0.297789	-0.367626
FBgn0039886	FBgn0040342	CG2003	CG3706	0.518082	0.189663	0.859712	0.590095	0.482641	0.592433	0.43806	0.756168	0.640143	0.330573	0.561342	0.361735
FBgn0039886	FBgn0030367	CG2003	Cyp311a1	0.403833	0.327004	0.812876	0.121035	0.367979	-0.275745	0.250747	0.511227	0.482712	0.29685	0.248271	-0.103048
FBgn0039886	FBgn0027934	CG2003	alpha-Est4aPsi	0.178084	-0.00266551	0.251512	0.154975	-0.0540832	0.0979478	0.231281	0.208401	0.22983	0.22411	0.195509	0.291215
FBgn0039886	FBgn0035243	CG2003	CG13926	0.0867087	-0.10081	-0.489519	-0.191891	0.270375	0.400466	-0.0560061	-0.253735	0.141296	-0.177751	-0.11039	0.436694
FBgn0039886	FBgn0034817	CG2003	Art7	0.461373	0.138507	0.865662	-0.288968	0.775672	-0.151137	0.402886	0.68949	0.696662	0.0691539	-0.0202339	-0.211133
FBgn0039886	FBgn0014073	CG2003	Tie	0.223682	0.362488	0.227225	-0.404306	0.128342	-0.709903	0.148894	0.094425	0.183984	0.281141	-0.407069	-0.281055
FBgn0039886	FBgn0038173	CG2003	Adgf-C	0.427345	0.11985	0.411012	0.404245	0.236351	-0.628658	0.183557	0.282933	0.386323	0.256382	0.240331	-0.334329
FBgn0039886	FBgn0037975	CG2003	CG3397	0.596952	0.0375597	0.695065	0.242904	0.77248	0.529797	0.508324	0.494408	0.734568	0.0144284	0.131819	0.439085
FBgn0039886	FBgn0032399	CG2003	CG6785	-0.128846	-0.11501	-0.497304	-0.601122	-0.36722	-0.407745	-0.103816	-0.350465	-0.469308	-0.0811065	-0.403569	-0.470417
FBgn0039886	FBgn0036550	CG2003	CG17026	0.757027	0.492573	0.879853	0.730993	0.447842	0.556709	0.541194	0.704175	0.46649	0.507726	0.594638	0.456843
FBgn0039886	FBgn0035670	CG2003	CG10472	0.619481	0.492555	0.751611	0.424498	0.0830067	-0.232472	0.274823	0.544182	0.230086	0.261419	0.345684	-0.256553
FBgn0039886	FBgn0039777	CG2003	Jon99Fii	0.538842	0.493038	0.698718	0.660161	-0.0642985	-0.280322	0.37326	0.549987	-0.110646	0.405959	0.614531	-0.358149
FBgn0039886	FBgn0002962	CG2003	nos	-0.406242	0.165262	-0.48138	0.246514	-0.0180641	0.287061	-0.21378	-0.223683	-0.195168	0.151883	0.259797	0.572612
FBgn0039886	FBgn0037408	CG2003	NPFR	0.111592	-0.224957	0.404451	0.293668	-0.0466252	-0.416626	-0.0878511	0.199351	0.124477	-0.116793	0.172629	-0.153163
FBgn0039886	FBgn0039494	CG2003	grass	0.252012	0.332069	0.742081	0.54469	0.0915056	-0.164514	0.203364	0.501579	0.20012	0.232562	0.528985	0.0347477
FBgn0039886	FBgn0015036	CG2003	Cyp4ae1	0.189153	0.425296	0.704678	0.654335	0.1618	-0.362454	0.095791	0.455648	0.341842	0.324767	0.4676	-0.344745
[truncated: 1,571 more rows]
