# Supplementary material for: Nonlinear expression patterns and multiple shifts in gene network interactions underlie robust phenotypic change in Drosophila melanogaster selected for night sleep duration
Source: PLoS Comput Biol. 2023 Aug 10;19(8):e1011389. doi: 10.1371/journal.pcbi.1011389 (PMC10443883; doi:10.1371/journal.pcbi.1011389)
Supplement: S14 Table — For each target gene the table lists the corresponding control line, the Flybase ID and gene symbol of the gene predicted to interact with the target gene, the normalized expression of the interacting gene for the Minos target gene line and isogenic control line, and the ratio of normalized expression (Minos/control). (XLSX) [file pcbi.1011389.s022.xlsx]

## Sheet: S14 Table
Target Gene	Control line	Sex	Flybase ID	Gene Symbol	Normalized expression in Minos line	Normalized expression in control line	Ratio (Minos/control)
CG12560	w1118	Female	FBgn0031974	CG12560	333.673	1234.14	0.270369
CG12560	w1118	Female	FBgn0040554	asRNA:CR17025	13.0935	15.6444	0.836943
CG12560	w1118	Female	FBgn0260720	asRNA:CR42547	205.367	241.92	0.848906
CG12560	w1118	Female	FBgn0031141	CG1304	14.7974	11.0415	1.34016
CG12560	w1118	Female	FBgn0035666	Jon65Aii	3487.65	2155.49	1.61803
CG12560	w1118	Male	FBgn0031974	CG12560	222.299	700.86	0.31718
CG12560	w1118	Male	FBgn0035666	Jon65Aii	908.612	1156.28	0.785809
CG12560	w1118	Male	FBgn0034494	CG10444	3874.51	3497.23	1.10788
CG12560	w1118	Male	FBgn0040342	CG3706	1028.45	901.364	1.14099
CG12560	w1118	Male	FBgn0259748	CG42397	5460.83	4003.93	1.36387
CG12560	w1118	Male	FBgn0031141	CG1304	8.84964	1.6012	5.52687
CG13793	w1118	Female	FBgn0035666	Jon65Aii	2373.34	2155.49	1.10107
CG13793	w1118	Female	FBgn0260720	asRNA:CR42547	282.406	241.92	1.16735
CG13793	w1118	Female	FBgn0031935	CG13793	235.324	126.795	1.85594
CG13793	w1118	Female	FBgn0050428	CG30428	725.348	243.234	2.9821
CG13793	w1118	Male	FBgn0029906	xit	1126.66	1042.45	1.08078
CG13793	w1118	Male	FBgn0031935	CG13793	654.223	262.197	2.49516
Cyp6a16	w1118	Female	FBgn0031726	Cyp6a16	95.5989	71.3405	1.34004
Cyp6a16	w1118	Male	FBgn0030628	CG9114	509.668	653.302	0.780142
Cyp6a16	w1118	Male	FBgn0031726	Cyp6a16	210.49	263.481	0.798882
Cyp6a16	w1118	Male	FBgn0034817	Art7	1699.01	1754.49	0.968377
hiw	w1118	Female	FBgn0030600	hiw	12283.9	11112.7	1.1054
hiw	w1118	Male	FBgn0038674	CG14285	252.11	277.36	0.908961
hiw	w1118	Male	FBgn0030600	hiw	24585.2	23132.9	1.06278
Jon65Aii	y1w67c23	Female	FBgn0035666	Jon65Aii	175.081	2709.92	0.0646073
Jon65Aii	y1w67c23	Female	FBgn0031935	CG13793	135.107	574.857	0.235027
Jon65Aii	y1w67c23	Female	FBgn0031974	CG12560	1426.89	1947.51	0.732673
Jon65Aii	y1w67c23	Female	FBgn0260720	asRNA:CR42547	146.518	166.189	0.881633
Jon65Aii	y1w67c23	Female	FBgn0050428	CG30428	736.202	805.987	0.913417
Jon65Aii	y1w67c23	Female	FBgn0032399	CG6785	452.095	473.417	0.954961
Jon65Aii	y1w67c23	Female	FBgn0039886	CG2003	1693.53	1346.3	1.25792
Jon65Aii	y1w67c23	Female	FBgn0013771	Cyp6a9	5298.62	3518.14	1.50609
Jon65Aii	y1w67c23	Female	FBgn0264950	asRNA:CR44119	160.611	84.6201	1.89803
Jon65Aii	y1w67c23	Male	FBgn0035666	Jon65Aii	73.7811	959.94	0.0768601
Jon65Aii	y1w67c23	Male	FBgn0030628	CG9114	421.553	699.463	0.602681
Jon65Aii	y1w67c23	Male	FBgn0031974	CG12560	698.331	926.572	0.753672
Jon65Aii	y1w67c23	Male	FBgn0051664	CG31664	1090.26	1377.14	0.791682
Jon65Aii	y1w67c23	Male	FBgn0039612	Nepl19	1529.89	1697.54	0.901236
Jon65Aii	y1w67c23	Male	FBgn0260720	asRNA:CR42547	320.527	337.199	0.950558
Jon65Aii	y1w67c23	Male	FBgn0039886	CG2003	1053.68	921.226	1.14378
Jon65Aii	y1w67c23	Male	FBgn0032399	CG6785	1284.41	1040.84	1.23401
Jon65Aii	y1w67c23	Male	FBgn0034494	CG10444	8051.59	4970.71	1.61981
Jon65Aii	y1w67c23	Male	FBgn0264950	asRNA:CR44119	295.139	167.257	1.76459
Jon65Aii	y1w67c23	Male	FBgn0038034	Cyp9f3	1235.5	325.207	3.79912
